# Supplementary material for: Carbon fibers derived from environmentally benign, ethanol-fractionated corn-stover lignin
Source: Royal Society of Chemistry journal article supplement (doi:10.1039/d4su00138a), 2024-01-01
Supplement: d4su00138a1.xlsx [file d4su00138a1.xlsx]

## Sheet: Carbon yield analysis
Feed Lignin				CS9.4K				CS15K				CS20K
Temp	Weight %	Temp	Weight %	Temp	Weight %	Temp	Weight %	Temp	Weight %	Temp	Weight %	Temp	Weight %	Temp	Weight %
22.0108	99.9967	22.9792	99.9963	17.1035	99.9909	17.0492	99.9981	22.8999	99.9969	22.1654	99.9998	28.5834	99.9942	28.5509	99.4676		Unfractionated CS			CS9.4K			CS15K			CS20K
22.0455	99.9966	23.009	99.9957	17.0988	99.9905	17.0517	99.997	22.9415	99.9956	22.1906	99.9984	28.6347	99.9914	28.6951	99.463
22.0699	99.9959	23.0352	99.9949	17.0972	99.99	17.048	99.996	22.9723	99.994	22.2208	99.9966	28.6791	99.9883	28.8426	99.4586		22.0108	99.9965		17.1035	99.9945		22.8999	99.9984		28.5834	99.7309
22.1052	99.9949	23.0598	99.9944	17.0934	99.9893	17.0449	99.9947	23.0022	99.9919	22.2481	99.9948	28.7319	99.9847	28.9916	99.4539		22.0455	99.9961		17.0988	99.9938		22.9415	99.997		28.6347	99.7272		Feed Lignin	CS9.4K	CS15K	CS20K		Lignin type	Carbon Yield
22.1259	99.9937	23.0823	99.9938	17.0955	99.9881	17.0487	99.9933	23.0334	99.9897	22.269	99.9929	28.7762	99.9807	29.142	99.449		22.0699	99.9954		17.0972	99.993		22.9723	99.9953		28.6791	99.7234		30.38	36.76	34.14	33.66		Feed Lignin	31.1±1.0
22.1577	99.9926	23.1045	99.9932	17.0922	99.9869	17.0505	99.9918	23.0683	99.9873	22.2927	99.9908	28.8255	99.9762	29.2921	99.4441		22.1052	99.9947		17.0934	99.992		23.0022	99.9934		28.7319	99.7193		31.73	38	34.98	36.99		CS9.4K	37.4±0.9
22.1844	99.9913	23.1337	99.9924	17.0981	99.9863	17.0472	99.9902	23.102	99.9849	22.3181	99.9888	28.8737	99.9715	29.4424	99.4394		22.1259	99.9937		17.0955	99.9907		23.0334	99.9913		28.7762	99.7148	AVG	31.055	37.38	34.56	35.325		CS15K	34.6±0.6
22.205	99.99	23.1526	99.9913	17.0946	99.9855	17.0521	99.9886	23.1302	99.9821	22.3422	99.9866	28.9212	99.9667	29.5964	99.4349		22.1577	99.9929		17.0922	99.9894		23.0683	99.989		28.8255	99.7102	SD	0.954594	0.876812	0.59397	2.35467		CS20K	35.3±2.4
22.2362	99.9891	23.1716	99.9901	17.0933	99.9844	17.0441	99.9875	23.16	99.9792	22.3645	99.9844	28.965	99.9615	29.7414	99.4298		22.1844	99.9919		17.0981	99.9883		23.102	99.9868		28.8737	99.7054
22.2689	99.9884	23.1913	99.9888	17.0918	99.9833	17.0483	99.9863	23.1899	99.9761	22.3864	99.982	29.0038	99.9557	29.8929	99.4248		22.205	99.9907		17.0946	99.9871		23.1302	99.9843		28.9212	99.7008
22.2983	99.9879	23.2144	99.9876	17.0958	99.982	17.0486	99.9851	23.2194	99.9731	22.4106	99.9798	29.0475	99.9498	30.0493	99.4201		22.2362	99.9896		17.0933	99.9859		23.16	99.9818		28.965	99.6957
22.3261	99.9871	23.241	99.9861	17.088	99.9803	17.0436	99.984	23.2489	99.9702	22.4367	99.9774	29.0905	99.9434	30.2014	99.4155		22.2689	99.9886		17.0918	99.9848		23.1899	99.979		29.0038	99.6902
22.3534	99.9865	23.2631	99.9847	17.088	99.9791	17.048	99.9832	23.2803	99.9669	22.4647	99.9751	29.136	99.9369	30.3468	99.4104		22.2983	99.9878		17.0958	99.9835		23.2194	99.9764		29.0475	99.6849
22.383	99.9858	23.286	99.9836	17.0923	99.9779	17.0465	99.9825	23.3041	99.9642	22.4889	99.9728	29.1849	99.9305	30.5013	99.4053		22.3261	99.9866		17.088	99.9821		23.2489	99.9738		29.0905	99.6794
22.4061	99.9853	23.3118	99.9822	17.0904	99.9772	17.0428	99.9818	23.3383	99.9612	22.5169	99.9705	29.2281	99.9243	30.6576	99.4003		22.3534	99.9856		17.088	99.9812		23.2803	99.971		29.136	99.6737
22.4312	99.9845	23.3338	99.9808	17.093	99.9759	17.0392	99.9803	23.368	99.9585	22.5383	99.9682	29.2679	99.9184	30.8074	99.3948		22.383	99.9847		17.0923	99.9802		23.3041	99.9685		29.1849	99.6679
22.4639	99.9834	23.3558	99.9793	17.0945	99.9742	17.0427	99.9791	23.3955	99.9555	22.5638	99.9657	29.3109	99.9124	30.9639	99.3898		22.4061	99.9838		17.0904	99.9795		23.3383	99.9659		29.2281	99.6623
22.4855	99.982	23.3808	99.9778	17.09	99.9725	17.0427	99.9779	23.4284	99.9527	22.5865	99.9634	29.3547	99.9061	31.1181	99.3841		22.4312	99.9827		17.093	99.9781		23.368	99.9634		29.2679	99.6566
22.515	99.9805	23.396	99.9764	17.0908	99.9707	17.0404	99.9761	23.4568	99.95	22.6114	99.961	29.3968	99.8999	31.2736	99.3784		22.4639	99.9814		17.0945	99.9766		23.3955	99.9606		29.3109	99.6511
22.5424	99.9784	23.4213	99.9748	17.0902	99.9688	17.0406	99.9744	23.4861	99.9471	22.6384	99.9586	29.4335	99.8937	31.4284	99.373		22.4855	99.9799		17.09	99.9752		23.4284	99.958		29.3547	99.6451
22.5657	99.976	23.4429	99.9732	17.0918	99.9666	17.0396	99.9729	23.516	99.9439	22.6611	99.9562	29.4749	99.8877	31.5842	99.367		22.515	99.9784		17.0908	99.9734		23.4568	99.9555		29.3968	99.6391
22.594	99.9737	23.4608	99.9716	17.0932	99.9646	17.0412	99.9715	23.5481	99.9409	22.6782	99.9537	29.5134	99.8813	31.7374	99.3607		22.5424	99.9766		17.0902	99.9716		23.4861	99.9528		29.4335	99.6334
22.6201	99.9708	23.4857	99.9698	17.0952	99.9623	17.0422	99.97	23.5732	99.9377	22.7039	99.9515	29.5609	99.8748	31.8911	99.3546		22.5657	99.9746		17.0918	99.9698		23.516	99.9501		29.4749	99.6273
22.6363	99.9682	23.5045	99.9679	17.0969	99.9599	17.0472	99.9686	23.6014	99.9343	22.7211	99.949	29.5952	99.8686	32.051	99.3486		22.594	99.9726		17.0932	99.968		23.5481	99.9473		29.5134	99.621
22.6635	99.9651	23.5316	99.966	17.1043	99.9578	17.0501	99.9669	23.63	99.931	22.7539	99.9464	29.6384	99.8623	32.2106	99.3423		22.6201	99.9703		17.0952	99.9661		23.5732	99.9446		29.5609	99.6147
22.6894	99.9621	23.5435	99.9641	17.1054	99.9559	17.0541	99.9656	23.6534	99.9274	22.7769	99.9436	29.6755	99.8558	32.3676	99.3364		22.6363	99.968		17.0969	99.9642		23.6014	99.9416		29.5952	99.6086
22.7201	99.9596	23.5716	99.9623	17.1142	99.9539	17.0579	99.9641	23.6811	99.9238	22.8019	99.9409	29.715	99.8496	32.527	99.3299		22.6635	99.9655		17.1043	99.9624		23.63	99.9387		29.6384	99.6023
22.7449	99.9572	23.594	99.9606	17.1129	99.952	17.0652	99.9625	23.7101	99.9202	22.823	99.9381	29.7511	99.8432	32.6772	99.3237		22.6894	99.9631		17.1054	99.9607		23.6534	99.9355		29.6755	99.5961
22.7711	99.9545	23.6135	99.9584	17.1167	99.9502	17.0719	99.9609	23.7368	99.9166	22.8415	99.9351	29.79	99.8369	32.8386	99.3175		22.7201	99.9609		17.1142	99.959		23.6811	99.9324		29.715	99.5898
22.7961	99.9519	23.6404	99.9562	17.1276	99.9484	17.0734	99.9594	23.7696	99.9128	22.8695	99.9322	29.8293	99.8306	32.9971	99.3108		22.7449	99.9589		17.1129	99.9573		23.7101	99.9292		29.7511	99.5834
22.8253	99.9496	23.6543	99.9538	17.1351	99.9473	17.0796	99.9575	23.794	99.9093	22.8899	99.9292	29.8655	99.8239	33.1521	99.3046		22.7711	99.9565		17.1167	99.9556		23.7368	99.9258		29.79	99.5772
22.844	99.9471	23.6765	99.9512	17.1361	99.9462	17.0892	99.9556	23.8188	99.9057	22.9143	99.926	29.9064	99.8176	33.3087	99.2986		22.7961	99.954		17.1276	99.9539		23.7696	99.9225		29.8293	99.5707
22.8763	99.945	23.7025	99.9489	17.1443	99.9447	17.0963	99.9537	23.8493	99.9022	22.9364	99.9225	29.9379	99.8114	33.4669	99.2923		22.8253	99.9517		17.1351	99.9524		23.794	99.9192		29.8655	99.5643
22.9044	99.9426	23.7195	99.9466	17.1514	99.9438	17.0999	99.9516	23.8739	99.8986	22.9613	99.9193	29.9769	99.8048	33.6317	99.2858		22.844	99.9491		17.1361	99.9509		23.8188	99.9158		29.9064	99.5581
22.9297	99.94	23.7458	99.9441	17.1635	99.9428	17.1147	99.9497	23.9015	99.895	22.9894	99.9162	30.0121	99.7984	33.7869	99.2795		22.8763	99.947		17.1443	99.9492		23.8493	99.9124		29.9379	99.5518
22.9592	99.9369	23.768	99.9417	17.1738	99.9412	17.1223	99.9477	23.9338	99.8915	23.0073	99.913	30.0519	99.7921	33.95	99.273		22.9044	99.9446		17.1514	99.9477		23.8739	99.909		29.9769	99.5453
22.9872	99.9336	23.7946	99.9393	17.1798	99.94	17.1323	99.9457	23.9589	99.888	23.0325	99.9099	30.0889	99.7856	34.1063	99.2672		22.9297	99.942		17.1635	99.9462		23.9015	99.9056		30.0121	99.539
23.0147	99.9302	23.8188	99.9367	17.1886	99.9387	17.1392	99.9434	23.9867	99.884	23.0615	99.9066	30.1177	99.7794	34.2661	99.2609		22.9592	99.9393		17.1738	99.9445		23.9338	99.9023		30.0519	99.5326
23.0405	99.927	23.842	99.9341	17.2054	99.9373	17.1575	99.9413	24.016	99.88	23.0839	99.9036	30.1571	99.7728	34.4252	99.2547		22.9872	99.9364		17.1798	99.9428		23.9589	99.8989		30.0889	99.5264
23.0689	99.9237	23.8646	99.9317	17.2145	99.9361	17.1724	99.9392	24.0439	99.8759	23.1041	99.9005	30.1893	99.7663	34.5815	99.2487		23.0147	99.9334		17.1886	99.9411		23.9867	99.8953		30.1177	99.5202
23.103	99.9199	23.8912	99.9291	17.2356	99.9344	17.1804	99.9373	24.0712	99.8717	23.1427	99.8972	30.2261	99.7602	34.7452	99.2422		23.0405	99.9306		17.2054	99.9393		24.016	99.8918		30.1571	99.5137
23.1235	99.9163	23.9147	99.9267	17.2446	99.933	17.1936	99.9351	24.1	99.8675	23.1631	99.8942	30.2656	99.7536	34.9059	99.2357		23.0689	99.9277		17.2145	99.9377		24.0439	99.8882		30.1893	99.5075
23.1597	99.9125	23.9458	99.9241	17.2575	99.9314	17.2107	99.9328	24.1312	99.8636	23.1883	99.8913	30.301	99.7469	35.0606	99.2291		23.103	99.9245		17.2356	99.9359		24.0712	99.8845		30.2261	99.5012
23.1891	99.9089	23.9699	99.9216	17.2781	99.9296	17.2213	99.9304	24.1589	99.8593	23.2191	99.8878	30.3315	99.7404	35.2239	99.2227		23.1235	99.9215		17.2446	99.934		24.1	99.8809		30.2656	99.4946
23.2189	99.9055	23.9937	99.9191	17.2956	99.9276	17.2345	99.9279	24.185	99.855	23.2409	99.8846	30.373	99.7335	35.3847	99.2161		23.1597	99.9183		17.2575	99.9321		24.1312	99.8774		30.301	99.488
23.2507	99.9022	24.0178	99.9167	17.3147	99.926	17.2558	99.9256	24.218	99.8502	23.2687	99.8814	30.4007	99.7266	35.548	99.2093		23.1891	99.9152		17.2781	99.93		24.1589	99.8735		30.3315	99.4815
23.2795	99.8988	24.0501	99.9142	17.3285	99.9242	17.2734	99.9231	24.2402	99.8456	23.296	99.8781	30.4399	99.72	35.7017	99.2025		23.2189	99.9123		17.2956	99.9278		24.185	99.8698		30.373	99.4748
23.311	99.8955	24.0717	99.9116	17.3542	99.9224	17.2908	99.9207	24.2732	99.8413	23.3253	99.875	30.4759	99.7131	35.8644	99.1957		23.2507	99.9095		17.3147	99.9258		24.218	99.8658		30.4007	99.468
23.3472	99.8919	24.1026	99.9091	17.3744	99.9206	17.3104	99.9184	24.3042	99.8372	23.3543	99.8717	30.5067	99.7065	36.0235	99.1886		23.2795	99.9065		17.3285	99.9236		24.2402	99.8618		30.4399	99.4612
23.3789	99.8881	24.1274	99.9064	17.3971	99.9181	17.3345	99.9164	24.3382	99.8332	23.3836	99.8683	30.5386	99.6998	36.1878	99.1813		23.311	99.9035		17.3542	99.9215		24.2732	99.8582		30.4759	99.4544
23.4126	99.8845	24.1588	99.9038	17.4183	99.9164	17.3511	99.9141	24.3701	99.8292	23.4137	99.8648	30.5753	99.693	36.3458	99.1742		23.3472	99.9005		17.3744	99.9195		24.3042	99.8544		30.5067	99.4475
23.4504	99.8809	24.19	99.9011	17.4424	99.9146	17.3762	99.9122	24.3977	99.8247	23.4517	99.8615	30.6081	99.6867	36.5046	99.1668		23.3789	99.8972		17.3971	99.9173		24.3382	99.8507		30.5386	99.4406
23.4809	99.8772	24.2236	99.8981	17.468	99.9128	17.4	99.9101	24.4238	99.8202	23.4807	99.858	30.6438	99.6802	36.6675	99.1597		23.4126	99.8941		17.4183	99.9153		24.3701	99.847		30.5753	99.4336
23.5145	99.873	24.2526	99.895	17.4868	99.9112	17.4211	99.9084	24.4619	99.8162	23.518	99.8546	30.6794	99.6738	36.8262	99.1524		23.4504	99.891		17.4424	99.9134		24.3977	99.8431		30.6081	99.4268
23.5498	99.8691	24.2861	99.892	17.522	99.9095	17.4441	99.9065	24.4971	99.8119	23.5397	99.8512	30.7191	99.6672	36.9894	99.1446		23.4809	99.8876		17.468	99.9115		24.4238	99.8391		30.6438	99.42
23.5875	99.8651	24.3221	99.8891	17.5472	99.9083	17.4764	99.9046	24.5275	99.8077	23.5735	99.8479	30.7434	99.6599	37.1456	99.1369		23.5145	99.884		17.4868	99.9098		24.4619	99.8354		30.6794	99.4131
23.6234	99.8613	24.3576	99.8859	17.5691	99.9069	17.501	99.903	24.5642	99.8036	23.6129	99.8443	30.783	99.6532	37.306	99.129		23.5498	99.8805		17.522	99.908		24.4971	99.8316		30.7191	99.4059
23.6675	99.8578	24.3868	99.8829	17.6034	99.9051	17.5311	99.9015	24.5952	99.7991	23.6479	99.8407	30.8205	99.6464	37.4703	99.1216		23.5875	99.8771		17.5472	99.9064		24.5275	99.8278		30.7434	99.3984
23.6998	99.8537	24.4213	99.8799	17.6344	99.9037	17.5545	99.8997	24.6288	99.7948	23.6797	99.8373	30.8542	99.6396	37.625	99.1143		23.6234	99.8736		17.5691	99.9049		24.5642	99.824		30.783	99.3911
23.7439	99.8504	24.4586	99.877	17.6637	99.9033	17.587	99.8975	24.6729	99.7905	23.7188	99.8341	30.8911	99.6329	37.7898	99.1067		23.6675	99.8704		17.6034	99.9033		24.5952	99.8199		30.8205	99.384
23.7806	99.8468	24.4952	99.874	17.6914	99.9023	17.6239	99.8956	24.7068	99.7862	23.7551	99.8307	30.9233	99.6261	37.9496	99.0989		23.6998	99.8668		17.6344	99.9017		24.6288	99.8161		30.8542	99.3769
23.8201	99.843	24.5281	99.8711	17.7303	99.9014	17.6583	99.8933	24.743	99.7825	23.7984	99.827	30.9622	99.6192	38.1134	99.0915		23.7439	99.8637		17.6637	99.9004		24.6729	99.8123		30.8911	99.3698
23.8651	99.8388	24.565	99.8685	17.7682	99.9005	17.6865	99.8913	24.7833	99.7785	23.8328	99.8234	30.9974	99.6123	38.2741	99.0837		23.7806	99.8604		17.6914	99.899		24.7068	99.8084		30.9233	99.3625
23.9032	99.835	24.6075	99.8659	17.8003	99.8995	17.7279	99.8889	24.8236	99.7745	23.8754	99.8199	31.0336	99.6057	38.4306	99.0759		23.8201	99.857		17.7303	99.8973		24.743	99.8048		30.9622	99.3554
23.9453	99.8312	24.6461	99.863	17.8426	99.8978	17.7623	99.8868	24.8615	99.7704	23.9094	99.8162	31.0697	99.5995	38.5905	99.0684		23.8651	99.8537		17.7682	99.8959		24.7833	99.801		30.9974	99.348
23.9862	99.8274	24.6789	99.8602	17.8829	99.8966	17.8018	99.8845	24.9049	99.7666	23.953	99.8125	31.1106	99.5937	38.7524	99.0609		23.9032	99.8504		17.8003	99.8942		24.8236	99.7972		31.0336	99.3408
24.032	99.8237	24.7201	99.8576	17.9225	99.8952	17.8381	99.882	24.947	99.7627	23.9984	99.8092	31.1468	99.5875	38.9113	99.0531		23.9453	99.8471		17.8426	99.8923		24.8615	99.7933		31.0697	99.334
24.0751	99.8192	24.7598	99.8549	17.9646	99.8943	17.8781	99.8792	24.9899	99.7586	24.0352	99.8059	31.1884	99.5813	39.0715	99.0451		23.9862	99.8438		17.8829	99.8905		24.9049	99.7896		31.1106	99.3273
24.1211	99.8153	24.8056	99.8521	18.0034	99.893	17.9211	99.8763	25.0351	99.7543	24.0812	99.8021	31.2228	99.5751	39.2285	99.0368		24.032	99.8407		17.9225	99.8886		24.947	99.786		31.1468	99.3203
24.1712	99.811	24.8469	99.8492	18.0492	99.8913	17.962	99.874	25.0741	99.7499	24.1235	99.7986	31.2671	99.5689	39.3881	99.0287		24.0751	99.837		17.9646	99.8868		24.9899	99.7823		31.1884	99.3132
24.223	99.8067	24.8949	99.8466	18.0893	99.8893	18.0067	99.8714	25.1151	99.7455	24.1681	99.7952	31.3074	99.5627	39.5476	99.021		24.1211	99.8337		18.0034	99.8847		25.0351	99.7782		31.2228	99.3059
24.2669	99.8028	24.9427	99.8439	18.1357	99.8876	18.0487	99.869	25.1641	99.7409	24.2153	99.7918	31.3403	99.5565	39.7076	99.0128		24.1712	99.8301		18.0492	99.8826		25.0741	99.7742		31.2671	99.2988
24.3178	99.7991	24.9863	99.8411	18.1828	99.8858	18.0887	99.8665	25.2099	99.7367	24.261	99.7885	31.3895	99.5505	39.8606	99.0046		24.223	99.8266		18.0893	99.8804		25.1151	99.7704		31.3074	99.2919
24.3644	99.7953	25.0308	99.8383	18.2264	99.8838	18.1357	99.8642	25.256	99.7323	24.3093	99.7852	31.4299	99.5443	40.0241	98.9962		24.2669	99.8234		18.1357	99.8783		25.1641	99.7664		31.3403	99.2846
24.4174	99.7911	25.0787	99.8356	18.2774	99.8826	18.1877	99.862	25.303	99.7282	24.3548	99.782	31.4709	99.5379	40.1831	98.9877		24.3178	99.8201		18.1828	99.8761		25.2099	99.7626		31.3895	99.2775
24.4687	99.787	25.1291	99.8327	18.3293	99.8806	18.2273	99.8598	25.3478	99.7235	24.4072	99.7786	31.5183	99.5316	40.3405	98.979		24.3644	99.8168		18.2264	99.874		25.256	99.7587		31.4299	99.2702
24.5186	99.7827	25.1783	99.8298	18.3815	99.8788	18.282	99.8575	25.3906	99.7191	24.4533	99.7751	31.557	99.5247	40.5005	98.9704		24.4174	99.8134		18.2774	99.8723		25.303	99.7551		31.4709	99.2628
24.5756	99.7789	25.2215	99.8269	18.4351	99.877	18.3312	99.8553	25.4477	99.715	24.5071	99.7715	31.6042	99.5182	40.6606	98.9614		24.4687	99.8098		18.3293	99.8702		25.3478	99.7511		31.5183	99.2553
24.628	99.7749	25.2764	99.824	18.4872	99.8756	18.3864	99.8536	25.4987	99.7109	24.5615	99.768	31.6473	99.5121	40.8254	98.9525		24.5186	99.8063		18.3815	99.8681		25.3906	99.7471		31.557	99.2476
24.6902	99.771	25.326	99.8213	18.5424	99.8744	18.4422	99.8514	25.5468	99.7067	24.6142	99.7645	31.6936	99.5057	40.9825	98.9436		24.5756	99.8029		18.4351	99.8662		25.4477	99.7433		31.6042	99.2398
24.7404	99.7674	25.3775	99.8185	18.6024	99.8732	18.4993	99.849	25.5992	99.7026	24.6658	99.7609	31.7356	99.4994	41.1355	98.9344		24.628	99.7994		18.4872	99.8646		25.4987	99.7394		31.6473	99.2323
24.7971	99.7636	25.4316	99.8155	18.6516	99.8719	18.5536	99.8467	25.6527	99.6982	24.7235	99.7575	31.7831	99.4933	41.2903	98.9259		24.6902	99.7961		18.5424	99.8629		25.5468	99.7356		31.6936	99.2246
24.8555	99.7598	25.4848	99.8124	18.7128	99.8708	18.6085	99.8441	25.703	99.6938	24.7773	99.7539	31.8279	99.4869	41.4498	98.9172		24.7404	99.793		18.6024	99.8611		25.5992	99.7317		31.7356	99.2169
24.913	99.756	25.5471	99.8097	18.7743	99.8697	18.6652	99.8417	25.7585	99.6893	24.8359	99.7503	31.8796	99.4804	41.6111	98.9086		24.7971	99.7895		18.6516	99.8593		25.6527	99.7278		31.7831	99.2096
24.9722	99.7525	25.5994	99.8065	18.837	99.8684	18.7234	99.8393	25.8139	99.6847	24.8944	99.7468	31.9275	99.4741	41.7707	98.8996		24.8555	99.7861		18.7128	99.8575		25.703	99.7239		31.8279	99.2021
25.0315	99.7487	25.6603	99.8036	18.9013	99.8675	18.7926	99.837	25.8685	99.6804	24.9508	99.7434	31.9781	99.468	41.9222	98.8911		24.913	99.7828		18.7743	99.8557		25.7585	99.7198		31.8796	99.1945
25.0923	99.7451	25.7106	99.8007	18.9656	99.8668	18.8479	99.8349	25.9271	99.6761	25.0053	99.7399	32.0255	99.4624	42.079	98.882		24.9722	99.7795		18.837	99.8539		25.8139	99.7157		31.9275	99.1868
25.1536	99.7414	25.7789	99.7978	19.0266	99.8657	18.9119	99.8327	25.982	99.6715	25.0628	99.7365	32.0772	99.456	42.2332	98.8735		25.0315	99.7761		18.9013	99.8523		25.8685	99.7119		31.9781	99.1795
25.2161	99.7376	25.841	99.7951	19.0914	99.8641	18.9789	99.8304	26.0432	99.6671	25.1228	99.733	32.1301	99.4494	42.3938	98.865		25.0923	99.7729		18.9656	99.8508		25.9271	99.708		32.0255	99.1722
25.2841	99.7336	25.8986	99.7921	19.1585	99.8626	19.0452	99.828	26.1048	99.6632	25.1836	99.7293	32.1756	99.443	42.5506	98.8566		25.1536	99.7696		19.0266	99.8492		25.982	99.704		32.0772	99.1647
25.349	99.7295	25.9579	99.7892	19.2284	99.861	19.1161	99.8259	26.1678	99.6592	25.2562	99.7258	32.2352	99.4367	42.7067	98.8475		25.2161	99.7663		19.0914	99.8472		26.0432	99.7001		32.1301	99.1572
25.4159	99.7255	26.0252	99.7865	19.3013	99.8594	19.1778	99.8234	26.2323	99.6551	25.3173	99.7222	32.2822	99.43	42.8596	98.8382		25.2841	99.7629		19.1585	99.8453		26.1048	99.6962		32.1756	99.1498
25.4781	99.7216	26.0812	99.7838	19.3677	99.8573	19.2491	99.8213	26.2903	99.6509	25.3804	99.7188	32.335	99.4235	43.0133	98.8287		25.349	99.7593		19.2284	99.8434		26.1678	99.6925		32.2352	99.1421
25.5489	99.7176	26.1518	99.7809	19.4448	99.8557	19.3148	99.8192	26.3585	99.647	25.4515	99.7152	32.3927	99.4173	43.1728	98.8193		25.4159	99.756		19.3013	99.8414		26.2323	99.6886		32.2822	99.1341
25.6145	99.7134	26.2187	99.7782	19.5136	99.8546	19.3917	99.8165	26.42	99.643	25.5175	99.7118	32.4539	99.4109	43.3261	98.8101		25.4781	99.7527		19.3677	99.8393		26.2903	99.6848		32.335	99.1261
25.6864	99.7092	26.2822	99.7755	19.5873	99.853	19.4592	99.8139	26.4899	99.6391	25.5853	99.7082	32.5066	99.4044	43.4828	98.8005		25.5489	99.7492		19.4448	99.8374		26.3585	99.6811		32.3927	99.1183
25.7588	99.7049	26.3529	99.7728	19.6654	99.8509	19.5302	99.8111	26.5574	99.6353	25.6477	99.7047	32.563	99.3982	43.6395	98.7911		25.6145	99.7458		19.5136	99.8355		26.42	99.6774		32.4539	99.1105
25.8247	99.7009	26.4204	99.77	19.741	99.8489	19.6098	99.8085	26.6285	99.6315	25.7243	99.7012	32.626	99.3926	43.7957	98.7814		25.6864	99.7424		19.5873	99.8334		26.4899	99.6736		32.5066	99.1024
25.9034	99.6969	26.4863	99.767	19.8177	99.8477	19.6894	99.8059	26.6951	99.6275	25.7922	99.6976	32.6823	99.3868	43.9474	98.7714		25.7588	99.7389		19.6654	99.831		26.5574	99.67		32.563	99.0947
25.9729	99.6932	26.557	99.7643	19.8996	99.8455	19.7667	99.8033	26.7627	99.6227	25.8634	99.6943	32.7439	99.3812	44.096	98.7611		25.8247	99.7354		19.741	99.8287		26.6285	99.6663		32.626	99.087
26.0474	99.6891	26.637	99.7616	19.9798	99.8439	19.8425	99.8009	26.834	99.6181	25.9356	99.6908	32.8037	99.3752	44.2507	98.7511		25.9034	99.732		19.8177	99.8268		26.6951	99.6626		32.6823	99.0791
26.1232	99.6851	26.7092	99.7585	20.0631	99.8417	19.9246	99.7986	26.904	99.6139	26.0116	99.687	32.8693	99.3697	44.4146	98.741		25.9729	99.7287		19.8996	99.8244		26.7627	99.6585		32.7439	99.0711
26.2019	99.681	26.7829	99.7556	20.1505	99.84	20.008	99.7963	26.9842	99.6095	26.0894	99.6835	32.9265	99.3635	44.5607	98.7311		26.0474	99.7254		19.9798	99.8224		26.834	99.6544		32.8037	99.0631
26.2766	99.6773	26.8589	99.7527	20.2341	99.8384	20.0864	99.794	27.0505	99.6048	26.1617	99.6799	32.9928	99.3571	44.709	98.7211		26.1232	99.7218		20.0631	99.8202		26.904	99.6505		32.8693	99.0553
26.3511	99.6735	26.9353	99.7496	20.3149	99.8364	20.1735	99.7917	27.1313	99.6001	26.2406	99.6763	33.0581	99.3509	44.8633	98.7111		26.2019	99.7183		20.1505	99.8182		26.9842	99.6465		32.9265	99.0473
26.4316	99.6697	27.0155	99.7466	20.4025	99.8344	20.2558	99.7895	27.2074	99.5956	26.3201	99.6727	33.1214	99.3446	45.015	98.7011		26.2766	99.715		20.2341	99.8162		27.0505	99.6423		32.9928	99.0391
26.5116	99.6657	27.0941	99.7434	20.4903	99.8329	20.3458	99.787	27.2823	99.5911	26.3921	99.6692	33.1911	99.3378	45.168	98.6909		26.3511	99.7115		20.3149	99.8141		27.1313	99.6382		33.0581	99.031
26.5907	99.6617	27.1657	99.7404	20.581	99.8312	20.4308	99.7845	27.3567	99.5867	26.4731	99.6657	33.2559	99.3314	45.318	98.6809		26.4316	99.7081		20.4025	99.8119		27.2074	99.6341		33.1214	99.0229
26.6737	99.6579	27.2489	99.7373	20.674	99.8291	20.5187	99.7821	27.4344	99.5825	26.5538	99.6622	33.3251	99.3247	45.4694	98.671		26.5116	99.7046		20.4903	99.8099		27.2823	99.6301		33.1911	99.0144
26.7581	99.654	27.3329	99.7342	20.768	99.8276	20.6084	99.7796	27.5201	99.5789	26.6358	99.6587	33.3936	99.3184	45.6227	98.6609		26.5907	99.701		20.581	99.8079		27.3567	99.6262		33.2559	99.0061
26.8454	99.6501	27.412	99.7311	20.8591	99.8263	20.7069	99.7769	27.5962	99.5752	26.7203	99.6551	33.4599	99.3119	45.772	98.6509		26.6737	99.6976		20.674	99.8056		27.4344	99.6223		33.3251	98.9979
26.9366	99.6466	27.496	99.7282	20.9506	99.8251	20.7947	99.7742	27.6774	99.5713	26.803	99.6518	33.5347	99.3051	45.9285	98.6406		26.7581	99.6941		20.768	99.8036		27.5201	99.6188		33.3936	98.9896
27.0149	99.6425	27.5813	99.7249	21.0449	99.8238	20.8897	99.7711	27.7607	99.5673	26.8856	99.6481	33.6028	99.299	46.0793	98.6304		26.8454	99.6906		20.8591	99.8016		27.5962	99.6152		33.4599	98.9814
27.104	99.6386	27.6623	99.7217	21.1382	99.8219	20.9816	99.768	27.8512	99.5632	26.9721	99.6448	33.6748	99.2931	46.2272	98.6203		26.9366	99.6874		20.9506	99.7996		27.6774	99.6115		33.5347	98.9728
27.1932	99.6348	27.7489	99.7188	21.2356	99.8203	21.0835	99.765	27.9301	99.5589	27.0605	99.6413	33.7476	99.2869	46.377	98.6101		27.0149	99.6837		21.0449	99.7975		27.7607	99.6077		33.6028	98.9647
27.2823	99.6309	27.8396	99.7158	21.3356	99.8181	21.1764	99.7619	28.0159	99.5545	27.1525	99.6378	33.8154	99.2811	46.5247	98.5997		27.104	99.6801		21.1382	99.7949		27.8512	99.604		33.6748	98.9567
27.3718	99.6274	27.9251	99.7127	21.4385	99.8162	21.2793	99.7591	28.1009	99.5501	27.2403	99.634	33.8961	99.2751	46.6767	98.5895		27.1932	99.6768		21.2356	99.7927		27.9301	99.6001		33.7476	98.9485
27.4656	99.6235	28.0103	99.7098	21.5417	99.8143	21.3724	99.7563	28.1886	99.5458	27.3256	99.6303	33.977	99.2684	46.818	98.5789		27.2823	99.6734		21.3356	99.79		28.0159	99.5961		33.8154	98.9404
27.5523	99.6192	28.1029	99.7069	21.6393	99.8125	21.4788	99.7534	28.2772	99.5414	27.4149	99.6269	34.0553	99.2622	46.9717	98.5684		27.3718	99.6701		21.4385	99.7877		28.1009	99.5921		33.8961	98.9323
27.6426	99.615	28.191	99.7039	21.7403	99.8102	21.5782	99.7506	28.3687	99.5366	27.504	99.6232	34.1344	99.2557	47.1217	98.5581		27.4656	99.6667		21.5417	99.7853		28.1886	99.5881		33.977	98.9237
27.7389	99.6111	28.2902	99.7008	21.8453	99.8075	21.6767	99.7479	28.4509	99.5318	27.6044	99.6197	34.2089	99.2493	47.2686	98.548		27.5523	99.663		21.6393	99.7829		28.2772	99.5841		34.0553	98.9153
27.8263	99.6066	28.3753	99.6979	21.9493	99.8052	21.7857	99.7452	28.5508	99.5271	27.696	99.6162	34.2926	99.2433	47.422	98.5378		27.6426	99.6594		21.7403	99.7804		28.3687	99.5799		34.1344	98.9069
27.9284	99.6023	28.4717	99.6951	22.0565	99.8029	21.8901	99.7426	28.6422	99.5225	27.7932	99.6126	34.3752	99.2369	47.568	98.5275		27.7389	99.6559		21.8453	99.7777		28.4509	99.5758		34.2089	98.8987
28.0223	99.5979	28.5719	99.6923	22.1598	99.8004	21.9924	99.7399	28.7322	99.5183	27.8821	99.6087	34.4546	99.2306	47.7132	98.5171		27.8263	99.6523		21.9493	99.7752		28.5508	99.5717		34.2926	98.8905
28.1193	99.5934	28.6682	99.6895	22.2705	99.7977	22.0995	99.7371	28.8228	99.5141	27.9783	99.6047	34.5439	99.2246	47.8567	98.5065		27.9284	99.6487		22.0565	99.7728		28.6422	99.5676		34.3752	98.8822
28.2166	99.589	28.7599	99.6866	22.382	99.7952	22.2057	99.7345	28.9197	99.5099	28.0761	99.6006	34.6294	99.2184	48.009	98.4964		28.0223	99.6451		22.1598	99.7702		28.7322	99.5635		34.4546	98.8739
28.3187	99.5848	28.8531	99.6836	22.4875	99.7923	22.3157	99.7318	29.0159	99.5054	28.1711	99.5965	34.711	99.2125	48.1477	98.4859		28.1193	99.6415		22.2705	99.7674		28.8228	99.5594		34.5439	98.8655
28.4163	99.5805	28.9491	99.6805	22.6032	99.7897	22.4219	99.729	29.1089	99.5007	28.2689	99.5923	34.7968	99.2067	48.295	98.4755		28.2166	99.6378		22.382	99.7648		28.9197	99.5553		34.6294	98.8574
28.5176	99.5763	29.0515	99.6774	22.7142	99.7871	22.539	99.7262	29.2149	99.496	28.3691	99.5883	34.8866	99.2005	48.4387	98.4651		28.3187	99.6342		22.4875	99.7621		29.0159	99.551		34.711	98.8492
28.6163	99.5722	29.1478	99.674	22.8285	99.7849	22.6489	99.7234	29.3104	99.4914	28.4705	99.584	34.9709	99.1942	48.5862	98.4544		28.4163	99.6305		22.6032	99.7594		29.1089	99.5465		34.7968	98.8411
28.7187	99.5679	29.2483	99.6709	22.945	99.7826	22.7613	99.7206	29.4123	99.4868	28.5742	99.5798	35.0599	99.188	48.7328	98.4433		28.5176	99.6268		22.7142	99.7567		29.2149	99.5421		34.8866	98.8328
28.8272	99.5639	29.3529	99.6676	23.0583	99.7801	22.8787	99.7177	29.5087	99.4825	28.6773	99.5756	35.1488	99.1817	48.8738	98.4325		28.6163	99.6231		22.8285	99.7541		29.3104	99.5377		34.9709	98.8243
28.9283	99.5601	29.4567	99.6642	23.175	99.7774	22.9947	99.7152	29.6109	99.478	28.7767	99.5717	35.2426	99.1757	49.0185	98.4213		28.7187	99.6194		22.945	99.7516		29.4123	99.5333		35.0599	98.8157
29.0385	99.556	29.5623	99.6608	23.29	99.7748	23.1079	99.7127	29.7119	99.473	28.8805	99.5676	35.3306	99.1691	49.1662	98.4102		28.8272	99.6157		23.0583	99.7489		29.5087	99.529		35.1488	98.8071
29.1401	99.552	29.6685	99.6574	23.4098	99.7724	23.2254	99.7102	29.8166	99.4683	28.9853	99.5637	35.4268	99.1623	49.3086	98.3993		28.9283	99.6121		23.175	99.7463		29.6109	99.5248		35.2426	98.7985
29.2476	99.5482	29.7699	99.6541	23.5279	99.7699	23.3421	99.7073	29.9206	99.4636	29.0931	99.5599	35.5167	99.1555	49.4496	98.3877		29.0385	99.6084		23.29	99.7437		29.7119	99.5203		35.3306	98.7896
29.3519	99.5441	29.88	99.6506	23.6464	99.7677	23.4563	99.7043	30.0231	99.4586	29.1997	99.5559	35.6082	99.1486	49.5923	98.3764		29.1401	99.6047		23.4098	99.7413		29.8166	99.516		35.4268	98.7808
29.4622	99.5404	29.9792	99.6472	23.7675	99.7656	23.5816	99.7015	30.1307	99.454	29.3071	99.5522	35.709	99.1419	49.7331	98.365		29.2476	99.6011		23.5279	99.7386		29.9206	99.5117		35.5167	98.7716
29.5719	99.5366	30.091	99.644	23.8883	99.7631	23.6973	99.6987	30.2403	99.4496	29.4216	99.5483	35.8042	99.1354	49.8808	98.3531		29.3519	99.5974		23.6464	99.736		30.0231	99.5073		35.6082	98.7625
29.6837	99.5323	30.2013	99.6407	24.0119	99.7603	23.8231	99.6959	30.3432	99.4452	29.5265	99.5444	35.904	99.1287	50.02	98.3416		29.4622	99.5938		23.7675	99.7336		30.1307	99.5031		35.709	98.7535
29.7928	99.528	30.3097	99.6373	24.1414	99.7573	23.9406	99.6929	30.454	99.4405	29.6338	99.5406	35.9937	99.1218	50.1572	98.3306		29.5719	99.5903		23.8883	99.7309		30.2403	99.4989		35.8042	98.7443
29.9052	99.5236	30.4245	99.634	24.2677	99.7545	24.0594	99.6894	30.5605	99.4354	29.7494	99.5365	36.0973	99.1149	50.2988	98.3193		29.6837	99.5865		24.0119	99.7281		30.3432	99.4948		35.904	98.7351
30.0209	99.5193	30.5297	99.6308	24.3947	99.7515	24.1876	99.6855	30.672	99.4304	29.8597	99.5322	36.1977	99.1082	50.443	98.3081		29.7928	99.5826		24.1414	99.7251		30.454	99.4905		35.9937	98.7262
30.1364	99.5152	30.6435	99.6277	24.5171	99.7489	24.3157	99.6819	30.7779	99.4257	29.9757	99.5281	36.2986	99.1015	50.5821	98.297		29.9052	99.5788		24.2677	99.7219		30.5605	99.486		36.0973	98.7171
30.242	99.5108	30.7603	99.6244	24.6427	99.7455	24.4421	99.6782	30.8912	99.4209	30.0857	99.5239	36.3945	99.0947	50.724	98.2858		30.0209	99.5751		24.3947	99.7185		30.672	99.4813		36.1977	98.7081
30.3545	99.506	30.8719	99.6209	24.7707	99.7423	24.563	99.6746	31.0104	99.4162	30.1981	99.5197	36.5006	99.0883	50.8623	98.2748		30.1364	99.5714		24.5171	99.7154		30.7779	99.4769		36.2986	98.6993
30.4751	99.5014	30.9808	99.6175	24.8988	99.7396	24.6951	99.6712	31.1237	99.4112	30.3156	99.5158	36.6032	99.0821	51.0047	98.2636		30.242	99.5676		24.6427	99.7119		30.8912	99.4724		36.3945	98.6903
30.5949	99.4969	31.1023	99.6141	25.0332	99.7364	24.8254	99.6677	31.2388	99.4064	30.4363	99.5114	36.7077	99.0758	51.1484	98.2524		30.3545	99.5635		24.7707	99.7084		31.0104	99.4679		36.5006	98.6815
30.7125	99.4924	31.2214	99.6107	25.1611	99.7337	24.9581	99.6639	31.3535	99.4012	30.5476	99.507	36.8164	99.0693	51.2852	98.2413		30.4751	99.5594		24.8988	99.7054		31.1237	99.4635		36.6032	98.6728
30.8318	99.488	31.3292	99.6073	25.2908	99.7306	25.0858	99.6601	31.4667	99.3961	30.6698	99.5028	36.9218	99.0628	51.4264	98.2304		30.5949	99.5555		25.0332	99.702		31.2388	99.4589		36.7077	98.6641
30.949	99.4838	31.4482	99.6039	25.4263	99.7277	25.2177	99.6564	31.5864	99.3911	30.7867	99.4983	37.0304	99.0563	51.5648	98.219		30.7125	99.5515		25.1611	99.6988		31.3535	99.4541		36.8164	98.6553
31.0711	99.4795	31.5725	99.6005	25.5607	99.7245	25.3484	99.6534	31.7027	99.386	30.9073	99.4941	37.1354	99.0503	51.7017	98.2078		30.8318	99.5477		25.2908	99.6953		31.4667	99.4495		36.9218	98.6466
31.1863	99.4752	31.6948	99.597	25.6901	99.7217	25.4837	99.6502	31.8183	99.381	31.025	99.4899	37.2448	99.0439	51.8382	98.1961		30.949	99.5439		25.4263	99.692		31.5864	99.4447		37.0304	98.6377
31.3065	99.4707	31.8127	99.5933	25.8291	99.7188	25.6126	99.6469	31.9344	99.3759	31.1477	99.4856	37.3512	99.0374	51.9792	98.1841		31.0711	99.54		25.5607	99.689		31.7027	99.44		37.1354	98.629
31.4291	99.4661	31.9341	99.5896	25.9672	99.7164	25.744	99.6433	32.0573	99.3707	31.2662	99.4813	37.4643	99.0308	52.1159	98.1722		31.1863	99.5361		25.6901	99.686		31.8183	99.4354		37.2448	98.62
31.5484	99.4619	32.055	99.5861	26.0983	99.7135	25.8806	99.6399	32.1786	99.3657	31.3911	99.4769	37.5759	99.0238	52.2553	98.1598		31.3065	99.532		25.8291	99.6828		31.9344	99.4308		37.3512	98.6108
31.6722	99.4573	32.1857	99.5826	26.2319	99.71	26.0124	99.6362	32.2985	99.3606	31.5091	99.4725	37.6928	99.0167	52.3922	98.1479		31.4291	99.5279		25.9672	99.6798		32.0573	99.426		37.4643	98.6015
31.7953	99.4525	32.3035	99.5794	26.3701	99.7066	26.152	99.6323	32.4229	99.3552	31.6357	99.4681	37.8036	99.0096	52.5256	98.1361		31.5484	99.524		26.0983	99.6767		32.1786	99.4213		37.5759	98.5918
31.9236	99.4479	32.4255	99.576	26.5111	99.7032	26.2874	99.6287	32.5419	99.35	31.7579	99.4637	37.9162	99.0026	52.6654	98.1246		31.6722	99.52		26.2319	99.6731		32.2985	99.4166		37.6928	98.5823
32.0451	99.4436	32.5526	99.5725	26.647	99.6997	26.4263	99.6251	32.6698	99.3447	31.8859	99.4591	38.0273	98.9957	52.8017	98.113		31.7953	99.516		26.3701	99.6694		32.4229	99.4117		37.8036	98.5728
32.1728	99.4392	32.6758	99.5688	26.7866	99.6961	26.5613	99.6216	32.7878	99.3394	32.0057	99.4547	38.1408	98.9888	52.9393	98.1012		31.9236	99.512		26.5111	99.6659		32.5419	99.4068		37.9162	98.5636
32.2933	99.4346	32.8072	99.5652	26.9289	99.6926	26.703	99.6177	32.9157	99.3343	32.1386	99.45	38.259	98.9811	53.0724	98.0892		32.0451	99.508		26.647	99.6624		32.6698	99.4019		38.0273	98.5544
32.4211	99.4294	32.9284	99.5616	27.066	99.6889	26.8465	99.614	33.0423	99.3289	32.2668	99.4453	38.3705	98.9736	53.2074	98.0777		32.1728	99.504		26.7866	99.6589		32.7878	99.397		38.1408	98.545
32.5519	99.425	33.056	99.5583	27.21	99.6848	26.9822	99.6102	33.1706	99.3238	32.3927	99.4406	38.4862	98.9667	53.3437	98.0662		32.2933	99.4999		26.9289	99.6551		32.9157	99.3922		38.259	98.5351
32.6793	99.4207	33.1823	99.5547	27.3569	99.6808	27.1237	99.6066	33.2959	99.3184	32.5191	99.4359	38.6149	98.9598	53.4766	98.0544		32.4211	99.4955		27.066	99.6514		33.0423	99.3871		38.3705	98.5256
32.8078	99.4161	33.3056	99.551	27.5003	99.6772	27.2625	99.603	33.4222	99.3128	32.6483	99.4312	38.732	98.9529	53.6097	98.0432		32.5519	99.4916		27.21	99.6475		33.1706	99.3822		38.4862	98.5164
32.9345	99.4117	33.4399	99.5473	27.6393	99.673	27.4085	99.5994	33.5492	99.3076	32.7789	99.4264	38.8501	98.9457	53.7471	98.032		32.6793	99.4877		27.3569	99.6437		33.2959	99.3772		38.6149	98.5071
33.0628	99.4074	33.5706	99.5433	27.7805	99.669	27.551	99.5959	33.6798	99.3023	32.9102	99.4217	38.9716	98.9386	53.8861	98.0205		32.8078	99.4835		27.5003	99.6401		33.4222	99.372		38.732	98.498
33.1979	99.4026	33.6972	99.5394	27.9277	99.6648	27.6952	99.592	33.8177	99.2968	33.0407	99.417	39.0906	98.9316	54.0125	98.0086		32.9345	99.4795		27.6393	99.6362		33.5492	99.367		38.8501	98.4888
33.3313	99.3978	33.8303	99.5357	28.0715	99.6606	27.8395	99.5878	33.9397	99.2912	33.1754	99.4121	39.2126	98.9246	54.1513	97.9964		33.0628	99.4753		27.7805	99.6324		33.6798	99.362		38.9716	98.4796
33.4598	99.3931	33.9614	99.532	28.219	99.6566	27.9849	99.5836	34.0757	99.2855	33.3025	99.4073	39.3367	98.9175	54.2828	97.9844		33.1979	99.471		27.9277	99.6284		33.8177	99.3569		39.0906	98.4701
33.5931	99.3883	34.0951	99.5282	28.3603	99.6522	28.1246	99.5798	34.2086	99.2797	33.4348	99.4024	39.4621	98.9106	54.4147	97.9726		33.3313	99.4667		28.0715	99.6242		33.9397	99.3516		39.2126	98.4605
33.7268	99.3839	34.2302	99.5244	28.5081	99.648	28.2731	99.576	34.3373	99.2744	33.5659	99.3973	39.5848	98.9036	54.5432	97.9607		33.4598	99.4626		28.219	99.6201		34.0757	99.3464		39.3367	98.451
33.8616	99.3793	34.3637	99.5203	28.6557	99.644	28.4202	99.5719	34.4705	99.2684	33.7089	99.3923	39.7058	98.8967	54.6766	97.9489		33.5931	99.4583		28.3603	99.616		34.2086	99.3411		39.4621	98.4416
33.9949	99.3746	34.4928	99.5164	28.8044	99.6398	28.5678	99.5678	34.6022	99.2629	33.8364	99.3875	39.8353	98.8892	54.811	97.9374		33.7268	99.4541		28.5081	99.612		34.3373	99.3358		39.5848	98.4322
34.1298	99.3703	34.6351	99.5127	28.9517	99.6356	28.7158	99.5637	34.7362	99.2575	33.9752	99.3826	39.9623	98.8818	54.9431	97.9264		33.8616	99.4498		28.6557	99.608		34.4705	99.3303		39.7058	98.4228
34.2659	99.3654	34.7655	99.5089	29.1016	99.6317	28.8668	99.5595	34.876	99.2521	34.105	99.3777	40.091	98.8746	55.0763	97.9148		33.9949	99.4455		28.8044	99.6038		34.6022	99.3252		39.8353	98.4133
34.3991	99.3604	34.9008	99.5052	29.2506	99.6274	29.0148	99.5555	35.0059	99.2463	34.2413	99.3729	40.2191	98.8674	55.2041	97.903		34.1298	99.4415		28.9517	99.5997		34.7362	99.3201		39.9623	98.4041
34.5364	99.3556	35.036	99.5014	29.402	99.6227	29.1611	99.5515	35.1394	99.2405	34.3799	99.368	40.3438	98.86	55.3383	97.8913		34.2659	99.4371		29.1016	99.5956		34.876	99.3149		40.091	98.3947
34.6719	99.3507	35.1718	99.4974	29.55	99.6185	29.3076	99.5474	35.2804	99.2348	34.5187	99.3632	40.4762	98.8523	55.4699	97.8802		34.3991	99.4328		29.2506	99.5914		35.0059	99.3096		40.2191	98.3852
34.8086	99.3455	35.3107	99.4934	29.704	99.6142	29.4603	99.5434	35.4148	99.2293	34.6564	99.3584	40.6041	98.8449	55.5988	97.869		34.5364	99.4285		29.402	99.5871		35.1394	99.3042		40.3438	98.3756
34.9442	99.3408	35.4444	99.4896	29.851	99.6102	29.6079	99.5389	35.5562	99.2234	34.7939	99.3534	40.737	98.8373	55.7243	97.8577		34.6719	99.4241		29.55	99.5829		35.2804	99.299		40.4762	98.3662
35.0824	99.336	35.5844	99.4857	30.0025	99.6058	29.7551	99.5342	35.69	99.2176	34.9305	99.3488	40.8698	98.8298	55.8564	97.8465		34.8086	99.4195		29.704	99.5788		35.4148	99.2939		40.6041	98.3569
35.2214	99.331	35.7233	99.4816	30.1561	99.6012	29.9129	99.53	35.8267	99.2118	35.076	99.344	41.0036	98.8218	55.9882	97.835		34.9442	99.4152		29.851	99.5745		35.5562	99.2884		40.737	98.3475
35.3604	99.3259	35.8624	99.4777	30.3072	99.5966	30.0601	99.5258	35.9685	99.2061	35.2118	99.3389	41.1316	98.8144	56.1222	97.8234		35.0824	99.4108		30.0025	99.57		35.69	99.2832		40.8698	98.3382
35.5007	99.3202	36.0003	99.4735	30.4555	99.5916	30.2111	99.5215	36.1089	99.2001	35.3553	99.3337	41.2658	98.8073	56.2477	97.8113		35.2214	99.4063		30.1561	99.5656		35.8267	99.2779		41.0036	98.3284
35.644	99.3153	36.1433	99.4693	30.6131	99.5867	30.3592	99.5173	36.244	99.1939	35.491	99.3287	41.3974	98.7994	56.3724	97.7995		35.3604	99.4018		30.3072	99.5612		35.9685	99.2725		41.1316	98.3189
35.7848	99.3106	36.2841	99.465	30.7652	99.5816	30.5133	99.5126	36.3858	99.1881	35.633	99.3236	41.5301	98.7914	56.5009	97.788		35.5007	99.3969		30.4555	99.5565		36.1089	99.2669		41.2658	98.3093
35.9215	99.3056	36.43	99.4608	30.9188	99.5769	30.6644	99.5082	36.5258	99.1822	35.7773	99.3181	41.6666	98.7837	56.6284	97.7771		35.644	99.3923		30.6131	99.552		36.244	99.2613		41.3974	98.2995
36.0642	99.3006	36.5697	99.4564	31.0742	99.572	30.8215	99.5039	36.6659	99.1761	35.918	99.3127	41.8059	98.7762	56.7582	97.7656		35.7848	99.3878		30.7652	99.5471		36.3858	99.2559		41.5301	98.2897
36.2055	99.2959	36.7109	99.4523	31.232	99.5668	30.9726	99.4994	36.811	99.1696	36.0551	99.3072	41.9343	98.7684	56.8848	97.7541		35.9215	99.3832		30.9188	99.5426		36.5258	99.2502		41.6666	98.2804
36.3462	99.2907	36.845	99.448	31.3852	99.5618	31.1245	99.4952	36.9536	99.1636	36.1983	99.3018	42.0745	98.7608	57.017	97.7423		36.0642	99.3785		31.0742	99.5379		36.6659	99.2444		41.8059	98.2709
36.4858	99.2857	36.9916	99.4435	31.5388	99.5562	31.2863	99.4908	37.0942	99.1572	36.3406	99.2961	42.2131	98.7529	57.1405	97.7304		36.2055	99.3741		31.232	99.5331		36.811	99.2384		41.9343	98.2612
36.6283	99.2801	37.1312	99.4391	31.6936	99.551	31.4347	99.4861	37.2373	99.1514	36.4837	99.2906	42.348	98.7452	57.2722	97.719		36.3462	99.3693		31.3852	99.5285		36.9536	99.2327		42.0745	98.2515
36.7711	99.2742	37.2764	99.4344	31.8536	99.5457	31.5905	99.4814	37.3814	99.1453	36.631	99.2851	42.4892	98.7373	57.3989	97.7073		36.4858	99.3646		31.5388	99.5235		37.0942	99.2267		42.2131	98.2416
36.9118	99.2688	37.4202	99.4302	32.0086	99.5401	31.7446	99.4767	37.5275	99.1393	36.7757	99.2797	42.6321	98.7291	57.5211	97.6955		36.6283	99.3596		31.6936	99.5185		37.2373	99.221		42.348	98.2321
37.0579	99.2634	37.5593	99.4258	32.1676	99.5343	31.9034	99.472	37.6684	99.1329	36.917	99.2741	42.767	98.7216	57.6518	97.6842		36.7711	99.3543		31.8536	99.5136		37.3814	99.2152		42.4892	98.2223
37.2009	99.2576	37.7009	99.4214	32.3239	99.5296	32.0644	99.4672	37.8139	99.126	37.0609	99.2683	42.9035	98.7142	57.7733	97.6724		36.9118	99.3495		32.0086	99.5084		37.5275	99.2095		42.6321	98.2123
37.3519	99.2518	37.8513	99.4169	32.483	99.5248	32.2176	99.4622	37.9586	99.1193	37.2088	99.2628	43.0488	98.7062	57.9033	97.6601		37.0579	99.3446		32.1676	99.5032		37.6684	99.2035		42.767	98.2029
37.4969	99.246	37.9958	99.4125	32.6302	99.5199	32.3716	99.4572	38.1075	99.1129	37.3518	99.2572	43.1891	98.6979	58.0286	97.6478		37.2009	99.3395		32.3239	99.4984		37.8139	99.1972		42.9035	98.1933
37.6412	99.2402	38.1403	99.408	32.7906	99.5147	32.5294	99.4523	38.2518	99.1066	37.5007	99.2515	43.3305	98.6898	58.1584	97.6358		37.3519	99.3343		32.483	99.4935		37.9586	99.1911		43.0488	98.1831
37.7835	99.2346	38.2859	99.4035	32.9462	99.5086	32.6864	99.4471	38.3948	99.0999	37.6447	99.246	43.4705	98.6817	58.2803	97.624		37.4969	99.3292		32.6302	99.4886		38.1075	99.1851		43.1891	98.1729
37.9311	99.2287	38.4321	99.3992	33.112	99.5031	32.841	99.4421	38.5448	99.0935	37.79	99.2406	43.6159	98.6736	58.4063	97.6126		37.6412	99.3241		32.7906	99.4835		38.2518	99.179		43.3305	98.1628
38.08	99.2232	38.5839	99.3949	33.2645	99.4973	32.9993	99.4368	38.6875	99.0868	37.9397	99.2349	43.7563	98.6653	58.5278	97.6008		37.7835	99.3191		32.9462	99.4779		38.3948	99.173		43.4705	98.1529
38.2304	99.2179	38.7282	99.3906	33.4273	99.4914	33.1581	99.4317	38.8333	99.0801	38.0892	99.2292	43.9015	98.6572	58.659	97.5895		37.9311	99.314		33.112	99.4726		38.5448	99.1671		43.6159	98.1431
38.3735	99.2125	38.8756	99.3859	33.5797	99.486	33.316	99.4264	38.984	99.0732	38.2356	99.2232	44.04	98.6489	58.7772	97.5778		38.08	99.3091		33.2645	99.4671		38.6875	99.1609		43.7563	98.133
38.5224	99.207	39.0219	99.3814	33.7449	99.4806	33.4757	99.4211	39.127	99.0666	38.3841	99.2173	44.1881	98.6402	58.9066	97.566		38.2304	99.3043		33.4273	99.4616		38.8333	99.1546		43.9015	98.1233
38.6712	99.2012	39.1694	99.3768	33.897	99.4744	33.6384	99.4158	39.2826	99.0602	38.5313	99.2115	44.3245	98.6313	59.0317	97.5543		38.3735	99.2992		33.5797	99.4562		38.984	99.1482		44.04	98.1134
38.8163	99.1959	39.3154	99.3724	34.0596	99.4674	33.7882	99.4106	39.4278	99.0537	38.6739	99.2057	44.4782	98.6229	59.1552	97.543		38.5224	99.2942		33.7449	99.4508		39.127	99.1419		44.1881	98.1031
38.9637	99.1905	39.4638	99.3679	34.2133	99.4607	33.9492	99.4052	39.5778	99.0469	38.8258	99.1998	44.6207	98.6143	59.2775	97.5318		38.6712	99.289		33.897	99.4451		39.2826	99.1359		44.3245	98.0928
39.1161	99.1848	39.608	99.3631	34.3776	99.4545	34.1076	99.4	39.7247	99.04	38.9679	99.1941	44.7654	98.6058	59.4034	97.5206		38.8163	99.2842		34.0596	99.439		39.4278	99.1297		44.4782	98.0829
39.2602	99.1788	39.7607	99.3586	34.5343	99.4488	34.2636	99.3945	39.87	99.0331	39.1205	99.1882	44.9117	98.5974	59.5236	97.5097		38.9637	99.2792		34.2133	99.433		39.5778	99.1233		44.6207	98.073
39.4102	99.1729	39.9119	99.3536	34.6938	99.4428	34.4256	99.3891	40.0201	99.0262	39.2651	99.182	45.0607	98.5885	59.6515	97.4981		39.1161	99.2739		34.3776	99.4273		39.7247	99.1171		44.7654	98.0632
39.5567	99.167	40.0606	99.3489	34.8528	99.4368	34.5829	99.3836	40.1736	99.0187	39.4153	99.1761	45.2046	98.5798	59.7757	97.4869		39.2602	99.2687		34.5343	99.4217		39.87	99.1106		44.9117	98.0536
39.7038	99.1614	40.2062	99.3443	35.0125	99.4307	34.7452	99.3783	40.3146	99.0114	39.565	99.17	45.3548	98.5714	59.8941	97.4756		39.4102	99.2633		34.6938	99.4159		40.0201	99.1041		45.0607	98.0433
39.8507	99.1556	40.3606	99.3396	35.1768	99.4243	34.9037	99.3724	40.4695	99.0044	39.715	99.1638	45.5014	98.5629	60.0184	97.4647		39.5567	99.258		34.8528	99.4102		40.1736	99.0974		45.2046	98.0333
40.0051	99.1496	40.511	99.3348	35.3389	99.4182	35.0596	99.3668	40.622	98.9973	39.8651	99.1578	45.6451	98.5546	60.1388	97.4536		39.7038	99.2528		35.0125	99.4045		40.3146	99.0907		45.3548	98.0235
40.1546	99.1438	40.658	99.33	35.4965	99.4122	35.2238	99.3614	40.7759	98.9902	40.0204	99.1516	45.7981	98.546	60.2567	97.4426		39.8507	99.2476		35.1768	99.3984		40.4695	99.0841		45.5014	98.0138
40.3023	99.1377	40.8062	99.325	35.6564	99.4068	35.3827	99.3558	40.922	98.983	40.1646	99.1451	45.9441	98.5374	60.3802	97.4314		40.0051	99.2422		35.3389	99.3925		40.622	99.0775		45.6451	98.0041
40.4493	99.1313	40.9596	99.3199	35.8109	99.401	35.5395	99.3502	41.0771	98.9757	40.3159	99.1388	46.0918	98.529	60.4983	97.4204		40.1546	99.2369		35.4965	99.3868		40.7759	99.0709		45.7981	97.9943
40.6005	99.1254	41.1088	99.3147	35.9798	99.3947	35.7	99.3445	41.2246	98.9685	40.4704	99.1323	46.2407	98.5203	60.6261	97.4091		40.3023	99.2313		35.6564	99.3813		40.922	99.0641		45.9441	97.9844
40.7499	99.1194	41.2564	99.3094	36.1352	99.3884	35.8583	99.3391	41.3776	98.9612	40.6211	99.1257	46.3911	98.5114	60.7459	97.3977		40.4493	99.2256		35.8109	99.3756		41.0771	99.0572		46.0918	97.9747
40.9064	99.1134	41.4086	99.3042	36.2945	99.3822	36.0184	99.3337	41.5259	98.9537	40.7695	99.1193	46.5422	98.5026	60.8699	97.3867		40.6005	99.22		35.9798	99.3696		41.2246	99.0504		46.2407	97.9647
41.0519	99.1072	41.5556	99.2988	36.4568	99.3758	36.1794	99.3282	41.6791	98.9465	40.9223	99.1128	46.6902	98.4936	60.9944	97.3751		40.7499	99.2144		36.1352	99.3638		41.3776	99.0434		46.3911	97.9545
41.2022	99.1007	41.7097	99.2935	36.6117	99.3694	36.3387	99.3223	41.8361	98.9392	41.0738	99.1065	46.8412	98.4843	61.1157	97.3641		40.9064	99.2088		36.2945	99.358		41.5259	99.0365		46.5422	97.9447
41.3501	99.0942	41.8601	99.2881	36.7696	99.3634	36.4996	99.3167	41.9847	98.9316	41.2184	99.1002	46.9959	98.4749	61.2357	97.3525		41.0519	99.203		36.4568	99.352		41.6791	99.0297		46.6902	97.9344
41.5063	99.0881	42.0159	99.2826	36.9349	99.357	36.6593	99.311	42.1349	98.924	41.3727	99.0937	47.1419	98.4657	61.3556	97.3409		41.2022	99.1971		36.6117	99.3459		41.8361	99.0228		46.8412	97.9242
41.6597	99.0821	42.1663	99.2771	37.0921	99.3502	36.8146	99.3053	42.2861	98.9163	41.5269	99.087	47.2953	98.4567	61.4796	97.3295		41.3501	99.1912		36.7696	99.3401		41.9847	99.0159		46.9959	97.9137
41.8114	99.0759	42.3192	99.2716	37.2597	99.3431	36.9766	99.2995	42.4378	98.9089	41.6785	99.0804	47.4443	98.4474	61.6031	97.3185		41.5063	99.1853		36.9349	99.334		42.1349	99.0089		47.1419	97.9033
41.9575	99.0697	42.4652	99.2659	37.4126	99.3364	37.1386	99.2935	42.587	98.9015	41.8288	99.0738	47.5963	98.4381	61.7188	97.3071		41.6597	99.1796		37.0921	99.3277		42.2861	99.0017		47.2953	97.8931
42.1098	99.0632	42.6258	99.2606	37.5799	99.3296	37.2977	99.2877	42.7408	98.8941	41.9792	99.067	47.7472	98.4289	61.8451	97.2959		41.8114	99.1737		37.2597	99.3213		42.4378	98.9947		47.4443	97.8829
42.2605	99.0569	42.7729	99.2552	37.7355	99.3226	37.4561	99.2818	42.8948	98.8867	42.129	99.0603	47.9052	98.4198	61.9617	97.2847		41.9575	99.1678		37.4126	99.315		42.587	98.9877		47.5963	97.8726
42.4112	99.0506	42.9257	99.2498	37.9014	99.3158	37.6186	99.2757	43.044	98.8792	42.284	99.0537	48.0584	98.4107	62.0816	97.2736		42.1098	99.1619		37.5799	99.3086		42.7408	98.9806		47.7472	97.8624
42.5703	99.0443	43.0789	99.2444	38.0625	99.3089	37.7779	99.2697	43.2012	98.8717	42.4373	99.0466	48.2099	98.4016	62.2026	97.2629		42.2605	99.156		37.7355	99.3022		42.8948	98.9735		47.9052	97.8522
42.7192	99.0382	43.2336	99.2388	38.2228	99.3017	37.9414	99.2639	43.3513	98.8639	42.5876	99.0396	48.3595	98.392	62.3214	97.2515		42.4112	99.1502		37.9014	99.2958		43.044	98.9664		48.0584	97.8421
42.8656	99.0321	43.3777	99.2333	38.3786	99.2943	38.0972	99.2579	43.5039	98.8562	42.7437	99.0325	48.5186	98.3826	62.4419	97.2406		42.5703	99.1443		38.0625	99.2893		43.2012	98.9592		48.2099	97.8323
43.0209	99.0258	43.5336	99.2279	38.5402	99.2875	38.2521	99.2519	43.662	98.8487	42.8978	99.0254	48.6687	98.373	62.5635	97.2302		42.7192	99.1385		38.2228	99.2828		43.3513	98.9518		48.3595	97.8217
43.1707	99.019	43.6863	99.2226	38.6927	99.28	38.4129	99.2457	43.811	98.8409	43.0438	99.0183	48.8204	98.3634	62.6814	97.2196		42.8656	99.1327		38.3786	99.2761		43.5039	98.9444		48.5186	97.8116
43.3227	99.0126	43.8317	99.2175	38.8562	99.2729	38.5721	99.2397	43.9623	98.8329	43.196	99.0112	48.9739	98.3536	62.8049	97.209		43.0209	99.1269		38.5402	99.2697		43.662	98.937		48.6687	97.8016
43.4718	99.0061	43.9859	99.2123	39.0182	99.2652	38.7318	99.2338	44.1168	98.8251	43.3477	99.0041	49.1284	98.3436	62.9208	97.1987		43.1707	99.1208		38.6927	99.2629		43.811	98.9296		48.8204	97.7915
43.6264	98.9996	44.1397	99.2068	39.1765	99.2579	38.892	99.2276	44.2704	98.8167	43.4991	98.9969	49.285	98.3333	63.0414	97.1885		43.3227	99.115		38.8562	99.2563		43.9623	98.9221		48.9739	97.7813
43.7799	98.9928	44.2914	99.2015	39.3336	99.2503	39.0498	99.2212	44.4262	98.8084	43.6529	98.9897	49.433	98.3231	63.1614	97.1782		43.4718	99.1092		39.0182	99.2495		44.1168	98.9146		49.1284	97.7712
43.9306	98.9861	44.4462	99.1962	39.4913	99.2429	39.2079	99.2148	44.5762	98.8001	43.8061	98.9824	49.5881	98.3131	63.2829	97.1677		43.6264	99.1032		39.1765	99.2428		44.2704	98.9068		49.285	97.7609
44.0824	98.9798	44.5948	99.1907	39.6571	99.2356	39.3662	99.2083	44.7334	98.7917	43.9558	98.9753	49.7445	98.3031	63.4	97.1571		43.7799	99.0972		39.3336	99.2358		44.4262	98.899		49.433	97.7506
44.2331	98.9731	44.7452	99.1853	39.8174	99.2279	39.5306	99.2017	44.8835	98.7836	44.1077	98.9681	49.8957	98.2934	63.5181	97.1468		43.9306	99.0911		39.4913	99.2289		44.5762	98.8912		49.5881	97.7404
44.3838	98.9661	44.898	99.1798	39.9693	99.22	39.6883	99.195	45.0357	98.7751	44.26	98.9607	50.0523	98.2835	63.6407	97.1361		44.0824	99.0853		39.6571	99.2219		44.7334	98.8835		49.7445	97.7301
44.5362	98.9588	45.0534	99.1742	40.1342	99.2118	39.8453	99.1883	45.1921	98.7665	44.4152	98.9533	50.207	98.2738	63.7574	97.1256		44.2331	99.0792		39.8174	99.2148		44.8835	98.8758		49.8957	97.7201
44.6873	98.9521	45.2065	99.1682	40.2906	99.2045	40.0035	99.1816	45.3469	98.7581	44.5664	98.946	50.3601	98.2639	63.8736	97.1147		44.3838	99.0729		39.9693	99.2075		45.0357	98.8679		50.0523	97.7098
44.8386	98.9455	45.3551	99.1621	40.4533	99.1965	40.159	99.1748	45.5005	98.7497	44.7157	98.9386	50.5122	98.2541	63.9905	97.104		44.5362	99.0665		40.1342	99.2001		45.1921	98.8599		50.207	97.6997
44.9907	98.9385	45.5124	99.1562	40.608	99.1884	40.3173	99.1682	45.6508	98.7409	44.8687	98.9311	50.6707	98.2444	64.1092	97.093		44.6873	99.0602		40.2906	99.193		45.3469	98.8521		50.3601	97.6893
45.1426	98.9313	45.6587	99.1504	40.7743	99.1802	40.4765	99.1614	45.8074	98.7325	45.0193	98.9237	50.819	98.2349	64.2332	97.0821		44.8386	99.0538		40.4533	99.1857		45.5005	98.8441		50.5122	97.679
45.2947	98.9244	45.8154	99.1442	40.9305	99.1723	40.6357	99.1546	45.9545	98.7242	45.1674	98.9164	50.9738	98.225	64.3468	97.0715		44.9907	99.0473		40.608	99.1783		45.6508	98.836		50.6707	97.6687
45.4443	98.9173	45.9681	99.1382	41.0893	99.1643	40.7959	99.1477	46.1087	98.7161	45.3233	98.9089	51.1329	98.2151	64.4663	97.0611		45.1426	99.0409		40.7743	99.1708		45.8074	98.8281		50.819	97.6585
45.5959	98.91	46.1175	99.1319	41.2437	99.1561	40.9493	99.141	46.2633	98.7076	45.4737	98.9013	51.2876	98.2048	64.5801	97.0507		45.2947	99.0343		40.9305	99.1634		45.9545	98.8203		50.9738	97.6483
45.7462	98.9027	46.2699	99.1255	41.4035	99.1481	41.1041	99.1343	46.4093	98.6989	45.6306	98.8936	51.4404	98.1946	64.6992	97.0404		45.4443	99.0277		41.0893	99.156		46.1087	98.8125		51.1329	97.6381
45.8958	98.8953	46.4229	99.1193	41.5596	99.1404	41.2659	99.1276	46.5687	98.6902	45.7788	98.8859	51.5947	98.1842	64.8225	97.0303		45.5959	99.0209		41.2437	99.1486		46.2633	98.8044		51.2876	97.6278
46.0487	98.888	46.5761	99.1129	41.7179	99.1321	41.4221	99.1209	46.7178	98.6814	45.9335	98.8783	51.7511	98.1733	64.9346	97.0199		45.7462	99.0141		41.4035	99.1412		46.4093	98.7962		51.4404	97.6175
46.1978	98.8808	46.7223	99.1067	41.8735	99.1242	41.5785	99.1141	46.8724	98.6727	46.0809	98.8704	51.9039	98.1625	65.0532	97.0098		45.8958	99.0073		41.5596	99.134		46.5687	98.7881		51.5947	97.6072
46.3519	98.8732	46.8777	99.1006	42.0351	99.1166	41.7369	99.107	47.0237	98.6638	46.2331	98.8628	52.0628	98.1517	65.171	96.9995		46.0487	99.0005		41.7179	99.1265		46.7178	98.7799		51.7511	97.5966
46.5058	98.8663	47.0275	99.0942	42.1882	99.1091	41.8884	99.1	47.1803	98.6551	46.381	98.8548	52.2178	98.1413	65.2939	96.9893		46.1978	98.9938		41.8735	99.1191		46.8724	98.7716		51.9039	97.5862
46.659	98.8594	47.1808	99.0879	42.3461	99.1012	42.0455	99.0931	47.3289	98.6462	46.5378	98.847	52.3752	98.1312	65.4113	96.9791		46.3519	98.9869		42.0351	99.1118		47.0237	98.7633		52.0628	97.5756
46.8065	98.8527	47.3268	99.0816	42.4976	99.0934	42.197	99.0862	47.4863	98.6373	46.6852	98.8389	52.5283	98.1211	65.5243	96.9687		46.5058	98.9802		42.1882	99.1045		47.1803	98.755		52.2178	97.5653
46.9589	98.8451	47.4808	99.0754	42.6588	99.0852	42.3566	99.0793	47.6354	98.6281	46.8355	98.8306	52.6854	98.1107	65.6431	96.9581		46.659	98.9737		42.3461	99.0972		47.3289	98.7466		52.3752	97.5551
47.1032	98.8378	47.6277	99.0693	42.8121	99.0774	42.5154	99.0725	47.788	98.6194	46.9893	98.8226	52.8402	98.1002	65.7606	96.9478		46.8065	98.9672		42.4976	99.0898		47.4863	98.7381		52.5283	97.5449
47.2557	98.8304	47.7798	99.0632	42.9726	99.0698	42.6712	99.0653	47.9427	98.6104	47.142	98.8144	52.9941	98.0896	65.8822	96.9378		46.9589	98.9603		42.6588	99.0822		47.6354	98.7294		52.6854	97.5344
47.4035	98.8231	47.9319	99.0569	43.1269	99.0615	42.8274	99.0582	48.0907	98.6014	47.2924	98.8062	53.1499	98.0793	65.9964	96.9279		47.1032	98.9536		42.8121	99.075		47.788	98.721		52.8402	97.524
47.5534	98.8159	48.0844	99.0506	43.2777	99.0537	42.9796	99.0512	48.241	98.5928	47.4445	98.7978	53.3072	98.0691	66.1128	96.918		47.2557	98.9468		42.9726	99.0675		47.9427	98.7124		52.9941	97.5137
47.7077	98.8082	48.2312	99.0442	43.4385	99.045	43.1398	99.0439	48.3967	98.5838	47.5971	98.7896	53.4624	98.0588	66.2331	96.9083		47.4035	98.94		43.1269	99.0599		48.0907	98.7038		53.1499	97.5036
47.8581	98.8004	48.3813	99.0378	43.5905	99.0365	43.2929	99.0367	48.5501	98.5748	47.745	98.7814	53.617	98.0486	66.3489	96.8986		47.5534	98.9333		43.2777	99.0525		48.241	98.6953		53.3072	97.4936
48.0069	98.7925	48.5304	99.0314	43.7385	99.0282	43.4446	99.0291	48.7032	98.5654	47.8937	98.7733	53.7721	98.0375	66.4625	96.889		47.7077	98.9262		43.4385	99.0445		48.3967	98.6867		53.4624	97.4835
48.1585	98.7847	48.6843	99.0249	43.8925	99.0198	43.6002	99.0214	48.8536	98.5565	48.047	98.7651	53.928	98.0262	66.5838	96.8799		47.8581	98.9191		43.5905	99.0366		48.5501	98.6781		53.617	97.4736
48.309	98.7766	48.8318	99.0181	44.0493	99.0114	43.7583	99.0137	49.0045	98.5471	48.195	98.7567	54.0851	98.0153	66.6994	96.8707		48.0069	98.9119		43.7385	99.0286		48.7032	98.6693		53.7721	97.4633
48.4556	98.7693	48.9859	99.0114	44.2065	99.0031	43.9055	99.0063	49.1593	98.5377	48.3452	98.7484	54.2337	98.0045	66.8161	96.8619		48.1585	98.9048		43.8925	99.0206		48.8536	98.6608		53.928	97.453
48.6071	98.7617	49.1323	99.0048	44.3587	98.9946	44.0596	98.9987	49.3078	98.528	48.4955	98.74	54.3925	97.9939	66.9291	96.8525		48.309	98.8974		44.0493	99.0126		49.0045	98.6519		54.0851	97.443
48.7541	98.7541	49.2853	98.9981	44.513	98.9859	44.2127	98.9909	49.4584	98.5185	48.6434	98.7318	54.5449	97.9832	67.0515	96.843		48.4556	98.8903		44.2065	99.0047		49.1593	98.6431		54.2337	97.4332
48.9077	98.7466	49.4305	98.9915	44.6644	98.9774	44.3635	98.9832	49.6054	98.509	48.7908	98.7236	54.6972	97.9723	67.1676	96.8333		48.6071	98.8833		44.3587	98.9966		49.3078	98.634		54.3925	97.4232
49.0557	98.7391	49.582	98.9849	44.8188	98.9691	44.5168	98.9756	49.7555	98.4993	48.9383	98.7153	54.8539	97.9615	67.2849	96.8238		48.7541	98.8761		44.513	98.9884		49.4584	98.6251		54.5449	97.4131
49.2039	98.7314	49.7306	98.9782	44.9701	98.9606	44.6672	98.968	49.9075	98.4899	49.0898	98.7069	55.0092	97.9506	67.401	96.8148		48.9077	98.8691		44.6644	98.9803		49.6054	98.6163		54.6972	97.4028
49.3505	98.7237	49.8811	98.9714	45.1259	98.9516	44.8191	98.9604	50.0646	98.4806	49.2392	98.6986	55.1603	97.9395	67.5196	96.8054		49.0557	98.862		44.8188	98.9723		49.7555	98.6073		54.8539	97.3927
49.5012	98.7158	50.0262	98.9647	45.2773	98.943	44.9721	98.9531	50.2131	98.4714	49.3867	98.6902	55.3136	97.9289	67.6379	96.7962		49.2039	98.8548		44.9701	98.9643		49.9075	98.5984		55.0092	97.3827
49.6438	98.7081	50.1796	98.9578	45.4305	98.9342	45.1216	98.9458	50.3617	98.4617	49.5315	98.6814	55.4681	97.918	67.7539	96.7864		49.3505	98.8476		45.1259	98.956		50.0646	98.5896		55.1603	97.3725
49.7948	98.7004	50.3256	98.951	45.5764	98.9256	45.2757	98.9385	50.5144	98.4523	49.6819	98.6728	55.6229	97.9067	67.869	96.7769		49.5012	98.8403		45.2773	98.948		50.2131	98.5808		55.3136	97.3626
49.943	98.6923	50.475	98.944	45.7287	98.9165	45.4262	98.9309	50.6657	98.4427	49.8312	98.6641	55.78	97.8959	67.9867	96.7673		49.6438	98.8329		45.4305	98.94		50.3617	98.5716		55.4681	97.3522
50.0899	98.6842	50.6217	98.9371	45.8777	98.9073	45.5721	98.9234	50.8191	98.4332	49.9789	98.6552	55.9367	97.8845	68.0999	96.7582		49.7948	98.8257		45.5764	98.932		50.5144	98.5625		55.6229	97.3418
50.2419	98.6762	50.7685	98.9301	46.0296	98.8981	45.7257	98.9163	50.9683	98.4236	50.1272	98.6462	56.0877	97.8732	68.2173	96.7492		49.943	98.8182		45.7287	98.9237		50.6657	98.5534		55.78	97.3316
50.3889	98.6682	50.9129	98.9231	46.1752	98.8889	45.8728	98.909	51.1148	98.4137	50.2716	98.6371	56.2381	97.8622	68.3367	96.7405		50.0899	98.8107		45.8777	98.9153		50.8191	98.5442		55.9367	97.3214
50.5332	98.6602	51.0678	98.9163	46.3307	98.8793	46.0239	98.9013	51.2618	98.4036	50.4237	98.6282	56.3984	97.8511	68.4497	96.7317		50.2419	98.8032		46.0296	98.9072		50.9683	98.5349		56.0877	97.3112
50.6871	98.6522	51.2152	98.9095	46.4813	98.8702	46.1789	98.8939	51.4084	98.3934	50.5707	98.6191	56.5455	97.8399	68.5674	96.7224		50.3889	98.7956		46.1752	98.8989		51.1148	98.5254		56.2381	97.3013
50.8318	98.6445	51.3591	98.9024	46.6306	98.8616	46.328	98.8864	51.5608	98.3833	50.7181	98.6099	56.6962	97.8287	68.6893	96.7134		50.5332	98.7882		46.3307	98.8903		51.2618	98.5159		56.3984	97.2914
50.9791	98.6366	51.5014	98.8952	46.7799	98.8524	46.4739	98.8788	51.7093	98.3736	50.8579	98.6005	56.8539	97.8175	68.8052	96.7043		50.6871	98.7808		46.4813	98.882		51.4084	98.5062		56.5455	97.2812
51.1229	98.6283	51.6506	98.888	46.9326	98.8434	46.6231	98.8711	51.8555	98.3636	51.0057	98.5915	57.0043	97.8064	68.9228	96.6954		50.8318	98.7735		46.6306	98.874		51.5608	98.4966		56.6962	97.271
51.2689	98.6201	51.7951	98.8807	47.0753	98.834	46.7717	98.8634	52.0029	98.3537	51.1532	98.5823	57.1575	97.7955	69.0382	96.6863		50.9791	98.7659		46.7799	98.8656		51.7093	98.487		56.8539	97.2609
51.4173	98.6117	51.9451	98.8735	47.2294	98.8253	46.922	98.8557	52.1522	98.344	51.3016	98.5733	57.3123	97.7842	69.156	96.6777		51.1229	98.7582		46.9326	98.8572		51.8555	98.4776		57.0043	97.2509
51.5631	98.6031	52.0911	98.8659	47.3752	98.8161	47.0722	98.848	52.3025	98.3341	51.4469	98.5641	57.4621	97.7733	69.2746	96.6687		51.2689	98.7504		47.0753	98.8487		52.0029	98.468		57.1575	97.2409
51.7087	98.5945	52.2381	98.8585	47.5279	98.8075	47.2189	98.8399	52.4502	98.3244	51.5941	98.5549	57.6149	97.7624	69.3941	96.6599		51.4173	98.7426		47.2294	98.8405		52.1522	98.4586		57.3123	97.231
51.8522	98.5858	52.3803	98.8508	47.6729	98.7988	47.3645	98.8322	52.5914	98.3147	51.7416	98.5458	57.7686	97.7513	69.5039	96.6509		51.5631	98.7345		47.3752	98.832		52.3025	98.4491		57.4621	97.221
51.9993	98.5766	52.5261	98.843	47.8226	98.7901	47.513	98.8242	52.7397	98.3051	51.8875	98.5365	57.9174	97.7404	69.6216	96.6421		51.7087	98.7265		47.5279	98.8237		52.4502	98.4396		57.6149	97.2111
52.1442	98.5679	52.6715	98.8351	47.9622	98.7809	47.6554	98.8159	52.886	98.2951	52.0296	98.5275	58.071	97.7293	69.7374	96.6332		51.8522	98.7183		47.6729	98.8155		52.5914	98.4303		57.7686	97.2011
52.2948	98.5591	52.8193	98.8275	48.1135	98.7716	47.8046	98.8077	53.0329	98.2854	52.1732	98.5186	58.2214	97.7181	69.8571	96.6248		51.9993	98.7098		47.8226	98.8071		52.7397	98.4208		57.9174	97.1912
52.4334	98.5503	52.9609	98.8199	48.2528	98.7623	47.9539	98.7996	53.1829	98.2754	52.3163	98.5094	58.3783	97.7069	69.9746	96.6161		52.1442	98.7015		47.9622	98.7984		52.886	98.4113		58.071	97.1812
52.5811	98.5413	53.1064	98.8124	48.4016	98.753	48.0993	98.7914	53.3266	98.2652	52.4619	98.5001	58.5292	97.6956	70.0861	96.6075		52.2948	98.6933		48.1135	98.7897		53.0329	98.402		58.2214	97.1715
52.7229	98.5326	53.2485	98.805	48.5417	98.7439	48.2439	98.7834	53.4733	98.2548	52.6095	98.4909	58.6806	97.6844	70.2067	96.5991		52.4334	98.6851		48.2528	98.7809		53.1829	98.3924		58.3783	97.1615
52.8676	98.524	53.393	98.7975	48.6903	98.7347	48.3867	98.7751	53.6221	98.2443	52.7531	98.4818	58.8275	97.673	70.3227	96.5905		52.5811	98.6769		48.4016	98.7722		53.3266	98.3826		58.5292	97.1516
53.0123	98.5157	53.5337	98.7899	48.8352	98.7256	48.5315	98.7671	53.766	98.2339	52.8925	98.4726	58.9776	97.6617	70.4364	96.5825		52.7229	98.6688		48.5417	98.7636		53.4733	98.3728		58.6806	97.1417
53.1527	98.5074	53.6817	98.7824	48.9757	98.7159	48.6738	98.7592	53.9134	98.2234	53.036	98.4634	59.1278	97.6503	70.5592	96.5743		52.8676	98.6607		48.6903	98.7549		53.6221	98.363		58.8275	97.1317
53.2981	98.4989	53.824	98.775	49.1246	98.7062	48.8239	98.7508	54.0603	98.2131	53.1851	98.4542	59.2782	97.6388	70.678	96.566		53.0123	98.6528		48.8352	98.7464		53.766	98.3533		58.9776	97.1221
53.4436	98.4907	53.9676	98.7676	49.2716	98.6967	48.9663	98.7428	54.2029	98.2028	53.3249	98.4449	59.4324	97.6273	70.7963	96.5576		53.1527	98.6449		48.9757	98.7375		53.9134	98.3434		59.1278	97.1123
53.5851	98.4824	54.1072	98.7602	49.4074	98.6874	49.1086	98.7351	54.3472	98.1927	53.469	98.4355	59.5773	97.6158	70.9134	96.5496		53.2981	98.637		49.1246	98.7285		54.0603	98.3337		59.2782	97.1024
53.7304	98.4737	54.2529	98.7526	49.5533	98.6783	49.2556	98.727	54.492	98.182	53.615	98.4258	59.7282	97.6046	71.0291	96.5416		53.4436	98.6292		49.2716	98.7198		54.2029	98.3238		59.4324	97.0925
53.8695	98.4652	54.3959	98.7451	49.6958	98.6693	49.3946	98.7188	54.6369	98.1715	53.7561	98.4164	59.8798	97.593	71.1431	96.5338		53.5851	98.6213		49.4074	98.7112		54.3472	98.3141		59.5773	97.0827
54.0139	98.4566	54.5418	98.7375	49.8425	98.6603	49.537	98.7108	54.7801	98.1612	53.898	98.407	60.0285	97.5816	71.2628	96.5258		53.7304	98.6132		49.5533	98.7026		54.492	98.3039		59.7282	97.0731
54.1563	98.4476	54.6806	98.7297	49.9845	98.6511	49.6773	98.7024	54.9281	98.151	54.0388	98.3975	60.1737	97.5701	71.3774	96.518		53.8695	98.6052		49.6958	98.694		54.6369	98.294		59.8798	97.0634
54.298	98.4387	54.8272	98.722	50.1306	98.6416	49.8239	98.6943	55.0624	98.1407	54.1819	98.3879	60.3291	97.5585	71.4957	96.5099		54.0139	98.597		49.8425	98.6855		54.7801	98.2841		60.0285	97.0537
54.4377	98.4297	54.9633	98.7145	50.2667	98.6321	49.9617	98.6859	55.2109	98.1307	54.3197	98.3782	60.4793	97.5473	71.6112	96.5016		54.1563	98.5886		49.9845	98.6767		54.9281	98.2743		60.1737	97.044
54.5786	98.421	55.1025	98.7068	50.4181	98.6228	50.1074	98.6773	55.3546	98.1205	54.4617	98.3683	60.6255	97.5359	71.7308	96.4936		54.298	98.5804		50.1306	98.668		55.0624	98.2643		60.3291	97.0342
54.721	98.412	55.2427	98.699	50.5513	98.6138	50.2441	98.6688	55.4949	98.1102	54.6041	98.3584	60.7735	97.5243	71.8462	96.4857		54.4377	98.5721		50.2667	98.659		55.2109	98.2544		60.4793	97.0244
54.8614	98.4029	55.3868	98.691	50.6959	98.6043	50.3863	98.6604	55.6389	98.0999	54.7448	98.3486	60.9243	97.5125	71.9627	96.4778		54.5786	98.5639		50.4181	98.65		55.3546	98.2444		60.6255	97.0148
54.9991	98.3937	55.5247	98.6831	50.8386	98.5948	50.5251	98.6518	55.7811	98.0897	54.8829	98.3387	61.0688	97.5011	72.0813	96.4699		54.721	98.5555		50.5513	98.6413		55.4949	98.2343		60.7735	97.005
55.1437	98.3841	55.6696	98.675	50.9806	98.5853	50.6668	98.6433	55.9249	98.0797	55.0239	98.3287	61.2127	97.49	72.2018	96.462		54.8614	98.5469		50.6959	98.6324		55.6389	98.2242		60.9243	96.9951
55.2764	98.3747	55.8059	98.6668	51.1156	98.5754	50.8071	98.6348	56.0645	98.0697	55.1647	98.3186	61.3602	97.4788	72.3225	96.4544		54.9991	98.5384		50.8386	98.6233		55.7811	98.2142		61.0688	96.9855
55.4196	98.3656	55.9448	98.6585	51.2556	98.5658	50.9494	98.6263	56.2072	98.0595	55.3054	98.3087	61.5078	97.4676	72.436	96.4469		55.1437	98.5296		50.9806	98.6143		55.9249	98.2042		61.2127	96.976
55.5613	98.3564	56.0878	98.6503	51.3954	98.5566	51.088	98.6176	56.3486	98.0493	55.4434	98.2988	61.6561	97.4561	72.5572	96.4394		55.2764	98.5208		51.1156	98.6051		56.0645	98.1942		61.3602	96.9666
55.6988	98.3473	56.226	98.6419	51.5327	98.5472	51.2264	98.6087	56.4924	98.0389	55.583	98.2889	61.803	97.4449	72.6746	96.432		55.4196	98.512		51.2556	98.5961		56.2072	98.1841		61.5078	96.9572
55.8384	98.338	56.3692	98.6333	51.6708	98.5379	51.3649	98.6	56.6324	98.0283	55.7196	98.279	61.9501	97.4335	72.7927	96.4249		55.5613	98.5033		51.3954	98.5871		56.3486	98.1741		61.6561	96.9477
55.9811	98.3282	56.5055	98.6248	51.8164	98.5288	51.5064	98.5915	56.77	98.0179	55.8637	98.2692	62.0949	97.4222	72.9081	96.4176		55.6988	98.4946		51.5327	98.5779		56.4924	98.1639		61.803	96.9385
56.1183	98.3187	56.6421	98.6164	51.9524	98.5193	51.6388	98.5831	56.9111	98.0074	56.0022	98.2594	62.2406	97.4112	73.0279	96.4103		55.8384	98.4857		51.6708	98.569		56.6324	98.1537		61.9501	96.9292
56.2551	98.3092	56.7824	98.608	52.0952	98.5105	51.7755	98.5744	57.0525	97.9967	56.1435	98.2495	62.3841	97.4002	73.1428	96.4033		55.9811	98.4765		51.8164	98.5601		56.77	98.1436		62.0949	96.9199
56.3911	98.2998	56.9195	98.5996	52.2293	98.5016	51.9146	98.5661	57.1946	97.9862	56.2832	98.2396	62.5346	97.3888	73.2615	96.3965		56.1183	98.4676		51.9524	98.5512		56.9111	98.1334		62.2406	96.9108
56.5294	98.291	57.0591	98.5915	52.3702	98.4925	52.0544	98.5576	57.3354	97.9755	56.415	98.2299	62.6781	97.3771	73.3802	96.3892		56.2551	98.4586		52.0952	98.5425		57.0525	98.1231		62.3841	96.9018
56.6697	98.282	57.1885	98.5831	52.504	98.4829	52.1901	98.549	57.4697	97.9647	56.5534	98.2199	62.8272	97.3663	73.4962	96.3818		56.3911	98.4497		52.2293	98.5338		57.1946	98.1129		62.5346	96.8927
56.8083	98.2729	57.3339	98.5748	52.6407	98.4731	52.3266	98.5405	57.6077	97.9543	56.6947	98.2099	62.9718	97.355	73.6201	96.3744		56.5294	98.4413		52.3702	98.525		57.3354	98.1027		62.6781	96.8832
56.9454	98.2639	57.4684	98.5664	52.777	98.4631	52.461	98.5323	57.7453	97.9439	56.8284	98.1998	63.1152	97.3439	73.7398	96.3672		56.6697	98.4325		52.504	98.516		57.4697	98.0923		62.8272	96.874
57.0808	98.2545	57.6099	98.5581	52.9137	98.4533	52.5977	98.524	57.8909	97.9333	56.9655	98.1897	63.2601	97.3327	73.8596	96.3604		56.8083	98.4238		52.6407	98.5068		57.6077	98.0821		62.9718	96.8647
57.218	98.2455	57.7386	98.5496	53.0445	98.4438	52.7357	98.5156	58.0222	97.923	57.1031	98.1795	63.4027	97.3216	73.9754	96.3532		56.9454	98.4151		52.777	98.4977		57.7453	98.0718		63.1152	96.8556
57.3585	98.2364	57.8773	98.541	53.1871	98.4345	52.874	98.5072	58.1614	97.9127	57.2419	98.1696	63.553	97.3104	74.0944	96.3462		57.0808	98.4063		52.9137	98.4886		57.8909	98.0615		63.2601	96.8466
57.494	98.2274	58.0108	98.5325	53.3208	98.4249	53.0081	98.4986	58.3022	97.9025	57.3792	98.1594	63.6873	97.2994	74.215	96.339		57.218	98.3975		53.0445	98.4797		58.0222	98.0512		63.4027	96.8374
57.6266	98.2184	58.1516	98.5241	53.4533	98.415	53.1457	98.4902	58.4407	97.8926	57.5178	98.1493	63.8389	97.2886	74.3358	96.3319		57.3585	98.3887		53.1871	98.4708		58.1614	98.0411		63.553	96.8283
57.7629	98.2092	58.2801	98.5156	53.5887	98.4053	53.2731	98.4816	58.5753	97.8821	57.6468	98.1393	63.9769	97.2777	74.4505	96.3244		57.494	98.3799		53.3208	98.4618		58.3022	98.0309		63.6873	96.8192
57.8936	98.1994	58.4186	98.5069	53.7224	98.3956	53.4119	98.4733	58.7119	97.8713	57.7824	98.1292	64.1273	97.2667	74.5732	96.3176		57.6266	98.3712		53.4533	98.4526		58.4407	98.0209		63.8389	96.8103
58.0323	98.1898	58.5524	98.4984	53.8527	98.3864	53.5452	98.465	58.85	97.8605	57.9201	98.1191	64.2662	97.2556	74.6908	96.3106		57.7629	98.3624		53.5887	98.4435		58.5753	98.0107		63.9769	96.8011
58.1695	98.18	58.6903	98.4899	53.9932	98.3775	53.6753	98.4564	58.9866	97.8495	58.0501	98.109	64.4102	97.2448	74.8074	96.3037		57.8936	98.3531		53.7224	98.4344		58.7119	98.0003		64.1273	96.7921
58.3051	98.1701	58.8207	98.4814	54.128	98.3685	53.8125	98.4478	59.127	97.8388	58.1869	98.0989	64.551	97.2339	74.927	96.2965		58.0323	98.3441		53.8527	98.4257		58.85	97.9898		64.2662	96.7831
58.439	98.1606	58.9508	98.4728	54.2587	98.3596	53.947	98.4393	59.2611	97.8286	58.3216	98.0886	64.6931	97.2229	75.0427	96.289		58.1695	98.335		53.9932	98.417		58.9866	97.9793		64.4102	96.7742
58.5726	98.1505	59.0902	98.4642	54.3894	98.35	54.0825	98.4308	59.4007	97.8179	58.4534	98.0785	64.8358	97.2121	75.1638	96.2818		58.3051	98.3258		54.128	98.4081		59.127	97.9689		64.551	96.7652
58.7081	98.1402	59.2284	98.4556	54.5255	98.3404	54.2161	98.4223	59.5322	97.8071	58.5855	98.0683	64.981	97.2015	75.2813	96.2749		58.439	98.3167		54.2587	98.3994		59.2611	97.9586		64.6931	96.756
58.8382	98.1302	59.3589	98.4468	54.6581	98.3309	54.344	98.4136	59.6693	97.7964	58.7203	98.058	65.1193	97.1911	75.3984	96.2678		58.5726	98.3074		54.3894	98.3904		59.4007	97.9482		64.8358	96.7469
58.9743	98.1201	59.4917	98.438	54.7985	98.3218	54.4824	98.4051	59.804	97.7857	58.8534	98.0477	65.2586	97.1806	75.5212	96.2606		58.7081	98.2979		54.5255	98.3814		59.5322	97.9377		64.981	96.7382
59.1107	98.1102	59.6213	98.4291	54.9309	98.3128	54.6094	98.3964	59.9429	97.7751	58.9899	98.0375	65.3968	97.1702	75.6425	96.2536		58.8382	98.2885		54.6581	98.3723		59.6693	97.9272		65.1193	96.7295
59.2448	98.1004	59.7604	98.4202	55.06	98.3034	54.7459	98.3875	60.077	97.7649	59.123	98.0273	65.5409	97.1602	75.7619	96.2466		58.9743	98.2791		54.7985	98.3635		59.804	97.9167		65.2586	96.7206
59.3784	98.0905	59.8915	98.4111	55.187	98.2935	54.8704	98.3785	60.2116	97.7546	59.2541	98.0171	65.6842	97.1496	75.8812	96.2399		59.1107	98.2696		54.9309	98.3546		59.9429	97.9063		65.3968	96.7119
59.5104	98.0807	60.0242	98.4021	55.3218	98.2838	55.0024	98.3696	60.3486	97.7446	59.3898	98.0069	65.8223	97.1391	76.002	96.2333		59.2448	98.2603		55.06	98.3454		60.077	97.8961		65.5409	96.7034
59.6413	98.0709	60.157	98.3931	55.447	98.2741	55.1393	98.3609	60.4806	97.7343	59.5152	97.9967	65.9629	97.1287	76.1233	96.2267		59.3784	98.2508		55.187	98.336		60.2116	97.8858		65.6842	96.6948
59.7719	98.061	60.2842	98.384	55.584	98.2639	55.2687	98.3518	60.614	97.7236	59.6553	97.9864	66.1019	97.1181	76.244	96.22		59.5104	98.2414		55.3218	98.3267		60.3486	97.8757		65.8223	96.6862
59.9078	98.0513	60.4163	98.375	55.7183	98.254	55.3975	98.3428	60.7537	97.7131	59.7881	97.9762	66.2419	97.1074	76.3616	96.2134		59.6413	98.232		55.447	98.3175		60.4806	97.8655		65.9629	96.6777
60.0375	98.0417	60.5503	98.3661	55.8445	98.2441	55.5256	98.334	60.8795	97.7028	59.9189	97.9659	66.3802	97.0963	76.4829	96.2066		59.7719	98.2225		55.584	98.3078		60.614	97.855		66.1019	96.669
60.1667	98.0323	60.6798	98.3572	55.9701	98.2342	55.653	98.3254	61.0177	97.6922	60.0475	97.9556	66.5187	97.0852	76.5991	96.2001		59.9078	98.2131		55.7183	98.2984		60.7537	97.8446		66.2419	96.6604
60.3001	98.0227	60.8135	98.348	56.106	98.2242	55.7863	98.3166	61.1473	97.6817	60.1824	97.9451	66.6542	97.074	76.724	96.1937		60.0375	98.2039		55.8445	98.289		60.8795	97.8343		66.3802	96.6514
60.4294	98.013	60.941	98.339	56.2258	98.2143	55.9167	98.3077	61.2782	97.6709	60.315	97.9346	66.7893	97.0629	76.8444	96.1877		60.1667	98.1948		55.9701	98.2798		61.0177	97.8239		66.5187	96.6427
60.5629	98.003	61.0723	98.3298	56.3587	98.2046	56.0455	98.299	61.4157	97.6602	60.4404	97.9241	66.9273	97.0517	76.9643	96.1813		60.3001	98.1854		56.106	98.2704		61.1473	97.8134		66.6542	96.6339
60.6959	97.9931	61.201	98.3206	56.4824	98.1957	56.1726	98.2904	61.5472	97.6496	60.5739	97.9137	67.0681	97.0407	77.085	96.1748		60.4294	98.176		56.2258	98.261		61.2782	97.8028		66.7893	96.6253
60.8229	97.9835	61.3391	98.3115	56.6167	98.1866	56.3031	98.2816	61.6745	97.6388	60.7035	97.9031	67.2068	97.0303	77.2075	96.1683		60.5629	98.1664		56.3587	98.2518		61.4157	97.7922		66.9273	96.6165
60.9553	97.9736	61.4628	98.3024	56.7438	98.1777	56.4293	98.273	61.8097	97.6283	60.8307	97.8927	67.3447	97.0199	77.3288	96.1623		60.6959	98.1569		56.4824	98.243		61.5472	97.7816		67.0681	96.6078
61.0828	97.9638	61.5965	98.2933	56.874	98.1694	56.5618	98.2648	61.9393	97.6179	60.9619	97.8822	67.4801	97.0096	77.4513	96.1563		60.8229	98.1475		56.6167	98.2341		61.6745	97.771		67.2068	96.5993
61.218	97.954	61.7244	98.2842	56.9954	98.1612	56.69	98.2566	62.0734	97.6078	61.091	97.8717	67.6179	96.9991	77.5671	96.1499		60.9553	98.138		56.7438	98.2254		61.8097	97.7605		67.3447	96.5911
61.3455	97.9442	61.8546	98.2749	57.1289	98.1528	56.8223	98.248	62.2016	97.597	61.2239	97.8612	67.7598	96.989	77.6918	96.1438		61.0828	98.1285		56.874	98.2171		61.9393	97.7501		67.4801	96.583
61.4733	97.9341	61.9811	98.2655	57.257	98.1444	56.9429	98.2394	62.3367	97.5863	61.3502	97.8509	67.8924	96.9786	77.8126	96.1377		61.218	98.1191		56.9954	98.2089		62.0734	97.7398		67.6179	96.5745
61.6033	97.924	62.1127	98.2562	57.3846	98.1357	57.0736	98.231	62.4678	97.576	61.485	97.8405	68.0251	96.9684	77.9313	96.1318		61.3455	98.1095		57.1289	98.2004		62.2016	97.7291		67.7598	96.5664
61.7311	97.914	62.2384	98.247	57.51	98.1269	57.1961	98.2226	62.5937	97.566	61.6087	97.8302	68.1609	96.9581	78.057	96.1259		61.4733	98.0998		57.257	98.1919		62.3367	97.7186		67.8924	96.5581
61.8599	97.9039	62.3686	98.238	57.6377	98.1181	57.3302	98.214	62.7258	97.5559	61.7389	97.8199	68.2943	96.9481	78.1802	96.1205		61.6033	98.0901		57.3846	98.1834		62.4678	97.7082		68.0251	96.5501
61.9881	97.8939	62.4948	98.229	57.7593	98.1087	57.4506	98.2057	62.8576	97.5459	61.8659	97.8097	68.4343	96.9382	78.3015	96.1152		61.7311	98.0805		57.51	98.1747		62.5937	97.6981		68.1609	96.542
62.1194	97.8838	62.6279	98.2198	57.8915	98.0992	57.581	98.1973	62.9834	97.5359	61.9969	97.7993	68.5659	96.928	78.4267	96.1098		61.8599	98.071		57.6377	98.166		62.7258	97.6879		68.2943	96.5343
62.2441	97.8736	62.7488	98.2103	58.0149	98.0898	57.7057	98.1887	63.1133	97.5256	62.1242	97.789	68.7011	96.9176	78.5483	96.1042		61.9881	98.0615		57.7593	98.1572		62.8576	97.6778		68.4343	96.5267
62.3722	97.8635	62.8827	98.2007	58.1442	98.0803	57.8312	98.18	63.2435	97.5156	62.25	97.7789	68.8397	96.9077	78.6706	96.0988		62.1194	98.0518		57.8915	98.1483		62.9834	97.6676		68.5659	96.5189
62.5045	97.8533	63.0053	98.1913	58.263	98.0707	57.9531	98.171	63.3725	97.5054	62.3749	97.7685	68.9696	96.898	78.7903	96.0934		62.2441	98.0419		58.0149	98.1392		63.1133	97.6573		68.7011	96.5109
62.6302	97.8431	63.139	98.1821	58.3958	98.061	58.0817	98.1622	63.4989	97.4955	62.5075	97.7581	69.1041	96.8884	78.9143	96.088		62.3722	98.0321		58.1442	98.1302		63.2435	97.6472		68.8397	96.5032
62.7531	97.8332	63.2601	98.1726	58.517	98.0516	58.2044	98.1533	63.6314	97.4855	62.6326	97.7476	69.2418	96.8788	79.0382	96.0829		62.5045	98.0223		58.263	98.1209		63.3725	97.6369		68.9696	96.4957
62.8844	97.8232	63.3847	98.1631	58.6435	98.0422	58.3332	98.1443	63.7625	97.475	62.7619	97.7374	69.3754	96.8692	79.158	96.0777		62.6302	98.0126		58.3958	98.1116		63.4989	97.6268		69.1041	96.4882
63.0084	97.8133	63.5086	98.1535	58.769	98.0323	58.4555	98.1356	63.8874	97.4648	62.8873	97.7272	69.5091	96.8593	79.2823	96.0723		62.7531	98.0029		58.517	98.1025		63.6314	97.6165		69.2418	96.4809
63.1413	97.8033	63.6395	98.1437	58.8917	98.0228	58.5833	98.1269	64.0149	97.4546	63.0189	97.7171	69.644	96.8495	79.4075	96.0668		62.8844	97.9931		58.6435	98.0932		63.7625	97.6062		69.3754	96.4734
63.2673	97.7934	63.7613	98.1339	59.0164	98.0131	58.701	98.1183	64.1407	97.4445	63.142	97.707	69.7739	96.8394	79.5256	96.0609		63.0084	97.9834		58.769	98.084		63.8874	97.596		69.5091	96.4658
63.3976	97.7836	63.8953	98.1244	59.1455	98.0037	58.8261	98.1097	64.2737	97.4344	63.2647	97.6971	69.9087	96.8296	79.6478	96.0552		63.1413	97.9735		58.8917	98.0748		64.0149	97.5859		69.644	96.4581
63.5217	97.7734	64.0162	98.115	59.264	97.9944	58.9507	98.1008	64.3973	97.4246	63.3892	97.6871	70.0412	96.8202	79.7735	96.0493		63.2673	97.9636		59.0164	98.0657		64.1407	97.5757		69.7739	96.4501
63.6452	97.7632	64.1421	98.1055	59.3929	97.9855	59.0775	98.0923	64.5284	97.4146	63.5165	97.6768	70.1712	96.8102	79.8976	96.0434		63.3976	97.954		59.1455	98.0567		64.2737	97.5658		69.9087	96.4424
63.7739	97.7534	64.2646	98.0959	59.5133	97.9768	59.1977	98.0837	64.6571	97.4047	63.6441	97.6669	70.3093	96.8006	80.0195	96.0379		63.5217	97.9442		59.264	98.0476		64.3973	97.5559		70.0412	96.4347
63.8972	97.7431	64.3896	98.0862	59.6387	97.9677	59.326	98.0752	64.7825	97.3947	63.774	97.6572	70.4356	96.7908	80.1444	96.0325		63.6452	97.9344		59.3929	98.0389		64.5284	97.5457		70.1712	96.4268
64.0215	97.7329	64.5147	98.0768	59.7606	97.9586	59.4427	98.0668	64.9154	97.385	63.8945	97.6472	70.5677	96.7811	80.2688	96.0263		63.7739	97.9246		59.5133	98.0303		64.6571	97.5358		70.3093	96.4193
64.1458	97.7225	64.64	98.0672	59.8824	97.9496	59.57	98.0584	65.0406	97.3754	64.0226	97.6373	70.7014	96.7718	80.3887	96.0209		63.8972	97.9147		59.6387	98.0215		64.7825	97.5259		70.4356	96.4116
64.2707	97.7121	64.7684	98.0575	60.0012	97.9412	59.6928	98.0499	65.166	97.3655	64.1437	97.6272	70.834	96.763	80.5119	96.0155		64.0215	97.9048		59.7606	98.0127		64.9154	97.5161		70.5677	96.4037
64.3991	97.7022	64.8915	98.0479	60.1282	97.9327	59.8135	98.0417	65.292	97.3555	64.2746	97.6168	70.9609	96.7538	80.6375	96.0099		64.1458	97.8948		59.8824	98.004		65.0406	97.5064		70.7014	96.3964
64.5221	97.6919	65.0135	98.0384	60.2494	97.9246	59.9379	98.0335	65.4183	97.3457	64.3975	97.6068	71.0943	96.7449	80.7632	96.0048		64.2707	97.8848		60.0012	97.9956		65.166	97.4964		70.834	96.3892
64.6474	97.6814	65.1418	98.0287	60.3751	97.9165	60.0597	98.0253	65.542	97.3359	64.5272	97.5965	71.225	96.7357	80.8837	96		64.3991	97.8751		60.1282	97.9872		65.292	97.4862		70.9609	96.3818
64.7729	97.6716	65.2598	98.0188	60.4863	97.9079	60.1801	98.0171	65.6671	97.3258	64.6493	97.5863	71.3543	96.7262	81.0065	95.9954		64.5221	97.8652		60.2494	97.979		65.4183	97.4763		71.0943	96.3749
64.8975	97.662	65.387	98.009	60.6132	97.8987	60.3021	98.0088	65.797	97.3157	64.7731	97.5762	71.4826	96.7171	81.1301	95.9909		64.6474	97.855		60.3751	97.9709		65.542	97.4662		71.225	96.3679
65.022	97.6519	65.5087	97.9993	60.7394	97.8892	60.4269	98.0008	65.9216	97.3059	64.8988	97.5659	71.6162	96.7075	81.2564	95.9859		64.7729	97.8452		60.4863	97.9625		65.6671	97.4561		71.3543	96.3608
65.1445	97.642	65.6346	97.9899	60.8619	97.8809	60.551	97.9924	66.0494	97.2963	65.0229	97.5553	71.7432	96.6981	81.3808	95.981		64.8975	97.8355		60.6132	97.9537		65.797	97.446		71.4826	96.354
65.27	97.6315	65.7558	97.9803	60.9814	97.8725	60.6681	97.9843	66.1731	97.2865	65.1465	97.545	71.8713	96.6887	81.5075	95.9764		65.022	97.8256		60.7394	97.945		65.9216	97.4359		71.6162	96.3467
65.3907	97.6216	65.8793	97.9707	61.1022	97.864	60.7883	97.9762	66.2999	97.2769	65.2714	97.5347	72.0051	96.6793	81.6336	95.9714		65.1445	97.8159		60.8619	97.9366		66.0494	97.4258		71.7432	96.3396
65.5137	97.6116	66.0025	97.9612	61.2233	97.855	60.9096	97.9683	66.4265	97.2673	65.3942	97.5245	72.1323	96.6699	81.7576	95.9661		65.27	97.8059		60.9814	97.9284		66.1731	97.4158		71.8713	96.3325
65.6415	97.6016	66.1303	97.9517	61.3476	97.8466	61.035	97.96	66.5533	97.2578	65.5146	97.5143	72.2615	96.6606	81.8814	95.9611		65.3907	97.7961		61.1022	97.9201		66.2999	97.4058		72.0051	96.3253
65.7672	97.5916	66.2491	97.942	61.4674	97.8382	61.149	97.9515	66.6771	97.2482	65.6407	97.5042	72.3886	96.6516	82.0041	95.9562		65.5137	97.7864		61.2233	97.9116		66.4265	97.3959		72.1323	96.318
65.8867	97.5817	66.3718	97.9323	61.5894	97.8298	61.2762	97.9431	66.7977	97.2387	65.7595	97.4941	72.5209	96.6428	82.132	95.9512		65.6415	97.7767		61.3476	97.9033		66.5533	97.3861		72.2615	96.3108
66.0134	97.5715	66.4902	97.9226	61.7107	97.8216	61.3942	97.9351	66.9216	97.2293	65.8843	97.4839	72.6492	96.6344	82.2536	95.9459		65.7672	97.7668		61.4674	97.8949		66.6771	97.3762		72.3886	96.3039
66.1347	97.5613	66.613	97.913	61.8343	97.8137	61.5143	97.9271	67.0432	97.2202	66.0092	97.4739	72.781	96.6262	82.3814	95.9408		65.8867	97.757		61.5894	97.8864		66.7977	97.3664		72.5209	96.297
66.2544	97.5514	66.7351	97.9033	61.945	97.8057	61.6353	97.9186	67.1735	97.2107	66.1291	97.4641	72.9059	96.6181	82.5064	95.9357		66.0134	97.747		61.7107	97.8783		66.9216	97.3566		72.6492	96.2902
66.3798	97.5413	66.8582	97.8932	62.0715	97.7973	61.7574	97.9105	67.2941	97.2013	66.249	97.4544	73.0351	96.6099	82.6353	95.9309		66.1347	97.7371		61.8343	97.8704		67.0432	97.3471		72.781	96.2835
66.498	97.5316	66.9774	97.8831	62.1919	97.7887	61.8733	97.9021	67.4171	97.1921	66.3733	97.4446	73.1661	96.6018	82.7579	95.9259		66.2544	97.7273		61.945	97.8621		67.1735	97.3374		72.9059	96.2769
66.6208	97.5215	67.104	97.8731	62.3111	97.7804	62.0007	97.894	67.5458	97.1827	66.4968	97.4346	73.2927	96.5936	82.8876	95.9211		66.3798	97.7173		62.0715	97.8539		67.2941	97.3279		73.0351	96.2704
66.7484	97.5114	67.2212	97.863	62.428	97.7728	62.1145	97.8856	67.6696	97.1733	66.6178	97.4247	73.4186	96.5853	83.0094	95.9166		66.498	97.7074		62.1919	97.8454		67.4171	97.3183		73.1661	96.2638
66.867	97.5012	67.3447	97.8529	62.5513	97.7646	62.2379	97.8775	67.7925	97.1641	66.7446	97.4152	73.5468	96.5771	83.1332	95.9118		66.6208	97.6973		62.3111	97.8372		67.5458	97.3087		73.2927	96.2573
66.99	97.4909	67.464	97.8429	62.6649	97.7562	62.3576	97.8695	67.916	97.1549	66.8639	97.4052	73.6733	96.5688	83.2588	95.9069		66.7484	97.6872		62.428	97.8292		67.6696	97.299		73.4186	96.2509
67.1108	97.4807	67.5828	97.8329	62.7944	97.7478	62.4827	97.8613	68.0362	97.1453	66.9839	97.3954	73.8007	96.5607	83.3827	95.9025		66.867	97.6771		62.5513	97.8211		67.7925	97.2896		73.5468	96.2444
67.2296	97.4706	67.7077	97.8227	62.9046	97.7395	62.5926	97.8531	68.1582	97.136	67.1041	97.3858	73.9253	96.5522	83.5097	95.8984		66.99	97.6669		62.6649	97.8129		67.916	97.28		73.6733	96.2379
67.3528	97.4604	67.8235	97.8125	63.0288	97.7316	62.7188	97.8449	68.2846	97.1267	67.2299	97.3761	74.0529	96.5435	83.6393	95.8941		67.1108	97.6568		62.7944	97.8046		68.0362	97.2704		73.8007	96.2316
67.4722	97.4499	67.9441	97.8025	63.1444	97.7236	62.8318	97.837	68.4068	97.1178	67.3519	97.3662	74.1779	96.5349	83.7655	95.8898		67.2296	97.6466		62.9046	97.7963		68.1582	97.2609		73.9253	96.2253
67.5957	97.4398	68.0635	97.7925	63.2674	97.7154	62.9538	97.8293	68.5304	97.1086	67.4713	97.3564	74.3058	96.5267	83.8899	95.8854		67.3528	97.6364		63.0288	97.7883		68.2846	97.2514		74.0529	96.2188
67.7179	97.4296	68.1881	97.7827	63.3871	97.7078	63.0711	97.8214	68.6523	97.0993	67.5951	97.3467	74.4311	96.5184	84.0195	95.881		67.4722	97.6262		63.1444	97.7803		68.4068	97.242		74.1779	96.2124
67.8346	97.4197	68.3067	97.7729	63.5095	97.6997	63.1907	97.8132	68.7713	97.0905	67.7174	97.3372	74.5552	96.5101	84.1471	95.8769		67.5957	97.6161		63.2674	97.7723		68.5304	97.2325		74.3058	96.2061
67.9611	97.4097	68.4259	97.7629	63.623	97.6917	63.3083	97.8051	68.8916	97.0815	67.8379	97.3275	74.6785	96.5021	84.2751	95.8727		67.7179	97.6062		63.3871	97.7646		68.6523	97.223		74.4311	96.1997
68.08	97.3995	68.5478	97.7527	63.7458	97.6833	63.4273	97.7973	69.0187	97.0727	67.9607	97.3177	74.8063	96.4939	84.4024	95.8689		67.8346	97.5963		63.5095	97.7564		68.7713	97.2138		74.5552	96.1935
68.1967	97.3896	68.6643	97.7425	63.8584	97.6757	63.5477	97.7895	69.1355	97.0639	68.0769	97.3082	74.9301	96.4856	84.5275	95.8651		67.9611	97.5863		63.623	97.7484		68.8916	97.2045		74.6785	96.1874
68.324	97.3795	68.784	97.7326	63.9833	97.6679	63.6686	97.7818	69.2613	97.0553	68.2005	97.2985	75.0529	96.4773	84.6521	95.8609		68.08	97.5761		63.7458	97.7403		69.0187	97.1952		74.8063	96.1814
68.4462	97.3696	68.9026	97.7228	64.0943	97.6602	63.7877	97.7743	69.3772	97.047	68.3189	97.2888	75.1801	96.4692	84.7809	95.8566		68.1967	97.5661		63.8584	97.7326		69.1355	97.186		74.9301	96.1754
68.5617	97.3595	69.0253	97.713	64.2171	97.6518	63.9071	97.7665	69.5071	97.0383	68.4454	97.279	75.3014	96.4617	84.9072	95.8527		68.324	97.556		63.9833	97.7249		69.2613	97.1769		75.0529	96.1691
68.682	97.3494	69.1429	97.703	64.3302	97.6442	64.0218	97.7585	69.6273	97.0295	68.562	97.2694	75.4299	96.454	85.0332	95.8487		68.4462	97.5462		64.0943	97.7172		69.3772	97.1679		75.1801	96.1629
68.8063	97.3394	69.2585	97.693	64.4517	97.6368	64.1462	97.7509	69.7502	97.0209	68.6826	97.2598	75.5521	96.4459	85.162	95.8445		68.5617	97.5362		64.2171	97.7091		69.5071	97.1587		75.3014	96.1572
68.9245	97.3293	69.3856	97.683	64.5694	97.6288	64.2598	97.7433	69.8704	97.0122	68.8021	97.2502	75.6819	96.4381	85.2917	95.8411		68.682	97.5262		64.3302	97.7013		69.6273	97.1494		75.4299	96.1513
69.0441	97.3192	69.5016	97.6732	64.6913	97.6215	64.3806	97.736	69.9919	97.0033	68.9236	97.2407	75.8003	96.4307	85.4166	95.8369		68.8063	97.5162		64.4517	97.6939		69.7502	97.1403		75.5521	96.1452
69.1615	97.3092	69.6176	97.6636	64.8046	97.6136	64.4957	97.7286	70.1098	96.9948	69.0432	97.2314	75.9284	96.4229	85.5428	95.8328		68.9245	97.5062		64.5694	97.6861		69.8704	97.1312		75.6819	96.1396
69.2833	97.2995	69.7428	97.6538	64.927	97.6062	64.617	97.721	70.2327	96.9861	69.1636	97.2219	76.0463	96.4154	85.6698	95.8285		69.0441	97.4962		64.6913	97.6788		69.9919	97.122		75.8003	96.1338
69.4027	97.2897	69.8597	97.6442	65.0381	97.5986	64.7318	97.7133	70.3531	96.9776	69.286	97.2124	76.1766	96.408	85.8008	95.8243		69.1615	97.4864		64.8046	97.6711		70.1098	97.1131		75.9284	96.1279
69.521	97.2798	69.9818	97.6343	65.1655	97.5908	64.8493	97.7053	70.4744	96.969	69.4082	97.2032	76.2966	96.4007	85.93	95.8201		69.2833	97.4767		64.927	97.6636		70.2327	97.104		76.0463	96.122
69.6352	97.2699	70.0975	97.6243	65.274	97.5836	64.9648	97.6975	70.5951	96.9603	69.526	97.194	76.4201	96.3936	86.0564	95.816		69.4027	97.4669		65.0381	97.6559		70.3531	97.095		76.1766	96.1161
69.7571	97.2602	70.2165	97.6144	65.3944	97.5764	65.0831	97.6898	70.7148	96.9519	69.6403	97.1847	76.5425	96.3861	86.1843	95.8119		69.521	97.457		65.1655	97.648		70.4744	97.0861		76.2966	96.1104
69.8762	97.2506	70.3291	97.6044	65.5077	97.569	65.199	97.6826	70.8335	96.9433	69.7629	97.1754	76.6636	96.3788	86.3114	95.8079		69.6352	97.4471		65.274	97.6406		70.5951	97.0771		76.4201	96.1048
69.9943	97.2408	70.4509	97.5947	65.6321	97.5614	65.3209	97.6754	70.9563	96.9348	69.8839	97.1662	76.7883	96.3716	86.4373	95.8043		69.7571	97.4373		65.3944	97.6331		70.7148	97.0683		76.5425	96.099
70.1175	97.2308	70.5677	97.5848	65.7469	97.5542	65.4351	97.6678	71.0744	96.9262	70.0058	97.1572	76.9131	96.3644	86.5662	95.8004		69.8762	97.4275		65.5077	97.6258		70.8335	97.0594		76.6636	96.0934
70.2347	97.2211	70.687	97.5747	65.8694	97.5468	65.5579	97.66	71.1948	96.9179	70.1237	97.1481	77.0373	96.3573	86.6932	95.7966		69.9943	97.4177		65.6321	97.6184		70.9563	97.0505		76.7883	96.0879
70.353	97.2113	70.8016	97.5646	65.9768	97.5394	65.6702	97.6526	71.3184	96.91	70.2376	97.1387	77.1608	96.3505	86.8231	95.7927		70.1175	97.4078		65.7469	97.611		71.0744	97.0417		76.9131	96.0824
70.4781	97.2009	70.9294	97.5547	66.0995	97.5324	65.7902	97.6452	71.4363	96.9019	70.3578	97.1296	77.2821	96.3434	86.9576	95.789		70.2347	97.3979		65.8694	97.6034		71.1948	97.033		77.0373	96.0769
70.5961	97.1907	71.0478	97.5446	66.2154	97.5251	65.9015	97.638	71.5551	96.8937	70.4793	97.1206	77.404	96.3364	87.0797	95.7852		70.353	97.388		65.9768	97.596		71.3184	97.0244		77.1608	96.0716
70.7108	97.1808	71.1602	97.5348	66.3301	97.5179	66.0267	97.631	71.6765	96.8856	70.5993	97.1114	77.525	96.3296	87.2065	95.7811		70.4781	97.3778		66.0995	97.5888		71.4363	97.0158		77.2821	96.0662
70.8362	97.1707	71.2791	97.5252	66.4511	97.5102	66.1367	97.6237	71.7978	96.8776	70.7161	97.1024	77.6478	96.3226	87.3344	95.7772		70.5961	97.3677		66.2154	97.5815		71.5551	97.0072		77.404	96.0608
70.9503	97.1608	71.3987	97.5153	66.5668	97.5029	66.2618	97.6165	71.9166	96.8693	70.8362	97.0933	77.7689	96.3155	87.4664	95.7731		70.7108	97.3578		66.3301	97.5744		71.6765	96.9985		77.525	96.0554
71.0669	97.1511	71.5123	97.5054	66.6855	97.4956	66.3732	97.6092	72.0356	96.8612	70.9581	97.0844	77.8907	96.3085	87.5977	95.7693		70.8362	97.3479		66.4511	97.5669		71.7978	96.99		77.6478	96.0499
71.1869	97.1414	71.6311	97.4954	66.8036	97.4884	66.4929	97.6016	72.1542	96.853	71.0754	97.0752	78.0146	96.3018	87.727	95.7658		70.9503	97.3381		66.5668	97.5597		71.9166	96.9813		77.7689	96.0443
71.3049	97.1319	71.7541	97.4855	66.9178	97.4814	66.6114	97.5946	72.2748	96.8453	71.1906	97.0663	78.1356	96.2953	87.8517	95.7621		71.0669	97.3283		66.6855	97.5524		72.0356	96.9728		77.8907	96.0389
71.4253	97.1222	71.8663	97.4758	67.0372	97.4742	66.7283	97.5875	72.395	96.8375	71.3152	97.0574	78.2553	96.2885	87.9819	95.7584		71.1869	97.3184		66.8036	97.545		72.1542	96.9641		78.0146	96.0338
71.5421	97.1126	71.9848	97.4659	67.1508	97.4673	66.8441	97.5802	72.5129	96.8293	71.4315	97.0486	78.3785	96.2816	88.109	95.7551		71.3049	97.3087		66.9178	97.538		72.2748	96.9558		78.1356	96.0287
71.6594	97.1035	72.1008	97.456	67.2678	97.4601	66.9641	97.573	72.6334	96.8214	71.5448	97.0399	78.4972	96.275	88.2384	95.7516		71.4253	97.299		67.0372	97.5308		72.395	96.9474		78.2553	96.0234
71.7789	97.0941	72.2192	97.4462	67.382	97.4531	67.0811	97.5656	72.7567	96.8135	71.6674	97.0311	78.6234	96.2689	88.367	95.7479		71.5421	97.2892		67.1508	97.5237		72.5129	96.939		78.3785	96.0183
71.8921	97.0851	72.3372	97.4362	67.5071	97.4468	67.1953	97.5583	72.8754	96.8056	71.7888	97.0223	78.7439	96.2622	88.4979	95.7447		71.6594	97.2798		67.2678	97.5166		72.6334	96.9306		78.4972	96.0133
72.0154	97.0761	72.4524	97.4261	67.6192	97.4405	67.3058	97.5512	72.9903	96.7975	71.9091	97.0135	78.865	96.2558	88.6266	95.7413		71.7789	97.2701		67.382	97.5093		72.7567	96.9223		78.6234	96.0084
72.1325	97.0668	72.5662	97.4162	67.7341	97.4341	67.43	97.5439	73.115	96.7896	72.0287	97.0048	78.9881	96.2496	88.7567	95.7379		71.8921	97.2606		67.5071	97.5025		72.8754	96.9139		78.7439	96.0035
72.2503	97.057	72.6847	97.4063	67.8522	97.4275	67.5437	97.5368	73.2316	96.782	72.145	96.9961	79.1091	96.2436	88.8876	95.7347		72.0154	97.2511		67.6192	97.4958		72.9903	96.9055		78.865	95.9985
72.3666	97.0476	72.8051	97.3963	67.9706	97.4208	67.6641	97.5298	73.3492	96.7745	72.2622	96.9878	79.2245	96.2375	89.0157	95.7315		72.1325	97.2415		67.7341	97.489		73.115	96.8972		78.9881	95.9937
72.4841	97.0382	72.9194	97.3861	68.0907	97.4138	67.7785	97.5227	73.4658	96.7671	72.3824	96.979	79.3527	96.231	89.1493	95.7281		72.2503	97.2317		67.8522	97.4822		73.2316	96.889		79.1091	95.9891
72.6026	97.0285	73.0382	97.376	68.2068	97.4069	67.9032	97.5156	73.5883	96.7597	72.5014	96.9705	79.4692	96.2247	89.2751	95.7249		72.3666	97.2219		67.9706	97.4753		73.3492	96.8811		79.2245	95.9845
72.7183	97.019	73.1533	97.3661	68.3178	97.3999	68.0124	97.5086	73.7095	96.7523	72.6234	96.962	79.5921	96.2186	89.3996	95.7216		72.4841	97.2121		68.0907	97.4682		73.4658	96.873		79.3527	95.9796
72.8366	97.0095	73.2709	97.3561	68.4348	97.3929	68.1313	97.5015	73.8251	96.7449	72.7379	96.9534	79.7071	96.2123	89.5346	95.7182		72.6026	97.2022		68.2068	97.4612		73.5883	96.8651		79.4692	95.9748
72.9605	97.0001	73.3873	97.3461	68.5538	97.386	68.2461	97.4947	73.9467	96.7375	72.8518	96.9449	79.8333	96.2057	89.6629	95.7153		72.7183	97.1925		68.3178	97.4542		73.7095	96.8571		79.5921	95.9701
73.0782	96.9903	73.5066	97.3362	68.6712	97.3793	68.3637	97.4877	74.0671	96.7304	72.9702	96.9365	79.9502	96.1996	89.7943	95.7121		72.8366	97.1828		68.4348	97.4472		73.8251	96.8491		79.7071	95.9652
73.1929	96.9804	73.6225	97.3263	68.7864	97.3723	68.481	97.4809	74.1822	96.7233	73.0885	96.9283	80.0721	96.1933	89.9222	95.7089		72.9605	97.1731		68.5538	97.4404		73.9467	96.8412		79.8333	95.9605
73.3132	96.9705	73.7398	97.3162	68.9031	97.3653	68.5997	97.4741	74.3019	96.7164	73.2109	96.9202	80.1883	96.187	90.0513	95.7059		73.0782	97.1632		68.6712	97.4335		74.0671	96.8334		79.9502	95.9558
73.4342	96.9608	73.8617	97.3064	69.0172	97.3589	68.7155	97.4674	74.4231	96.7094	73.3283	96.9119	80.3122	96.1809	90.1862	95.7026		73.1929	97.1533		68.7864	97.4266		74.1822	96.8258		80.0721	95.9511
73.5475	96.9513	73.9762	97.2967	69.1392	97.3529	68.8287	97.4607	74.5419	96.7021	73.445	96.9037	80.4303	96.1751	90.3113	95.6989		73.3132	97.1434		68.9031	97.4197		74.3019	96.8183		80.1883	95.9465
73.6645	96.9419	74.0916	97.287	69.2533	97.3469	68.9469	97.4543	74.657	96.6948	73.5591	96.8957	80.5525	96.1694	90.4401	95.6955		73.4342	97.1336		69.0172	97.4132		74.4231	96.8107		80.3122	95.9417
73.7834	96.9327	74.2032	97.2773	69.3733	97.3413	69.0639	97.4477	74.7771	96.6876	73.6838	96.8875	80.6717	96.1636	90.574	95.6921		73.5475	97.124		69.1392	97.4068		74.5419	96.8029		80.4303	95.937
73.9025	96.9234	74.3182	97.2674	69.4864	97.3361	69.1807	97.4411	74.8996	96.6804	73.7975	96.8793	80.7946	96.1578	90.703	95.6888		73.6645	97.1145		69.2533	97.4006		74.657	96.7952		80.5525	95.9325
74.0157	96.9141	74.4331	97.2578	69.6039	97.3304	69.2984	97.4345	75.0147	96.6731	73.9197	96.8713	80.9094	96.152	90.8344	95.6858		73.7834	97.105		69.3733	97.3945		74.7771	96.7875		80.6717	95.9279
74.1337	96.9047	74.5551	97.2482	69.7188	97.3246	69.4134	97.428	75.1317	96.6658	74.0396	96.8632	81.0322	96.1465	90.9635	95.6823		73.9025	97.0954		69.4864	97.3886		74.8996	96.7798		80.7946	95.9233
74.2483	96.8957	74.6734	97.2385	69.8367	97.3183	69.5349	97.4215	75.2491	96.6586	74.1572	96.855	81.1502	96.1409	91.0949	95.6789		74.0157	97.086		69.6039	97.3824		75.0147	96.7722		80.9094	95.9189
74.3688	96.8867	74.7893	97.2287	69.9497	97.3125	69.6471	97.4147	75.3699	96.6515	74.2752	96.8467	81.2711	96.1353	91.2262	95.6758		74.1337	97.0764		69.7188	97.3763		75.1317	96.7645		81.0322	95.9144
74.4867	96.8776	74.9056	97.2188	70.0746	97.3071	69.7643	97.408	75.4863	96.6446	74.3969	96.8384	81.3899	96.1298	91.3577	95.6727		74.2483	97.0671		69.8367	97.3699		75.2491	96.7568		81.1502	95.9099
74.6031	96.8685	75.0196	97.2089	70.1867	97.3012	69.8797	97.4016	75.6062	96.6378	74.5148	96.8304	81.5126	96.1242	91.4855	95.6698		74.3688	97.0577		69.9497	97.3636		75.3699	96.7491		81.2711	95.9055
74.7213	96.8593	75.1361	97.1992	70.3071	97.2951	69.9997	97.3951	75.7235	96.6313	74.6327	96.8225	81.6261	96.1184	91.6183	95.667		74.4867	97.0482		70.0746	97.3575		75.4863	96.7415		81.3899	95.9012
74.837	96.8498	75.2511	97.1895	70.4218	97.2892	70.1185	97.3883	75.8421	96.6251	74.7488	96.8144	81.7482	96.1128	91.7481	95.6642		74.6031	97.0387		70.1867	97.3514		75.6062	96.7341		81.5126	95.897
74.9565	96.8404	75.3701	97.1797	70.5355	97.2833	70.2331	97.3816	75.9613	96.6186	74.8666	96.8063	81.8633	96.1074	91.8788	95.6616		74.7213	97.0293		70.3071	97.3451		75.7235	96.7269		81.6261	95.8927
75.0769	96.831	75.4855	97.1699	70.6547	97.2774	70.3505	97.375	76.0808	96.612	74.9872	96.7984	81.9858	96.102	92.0133	95.659		74.837	97.0196		70.4218	97.3387		75.8421	96.7198		81.7482	95.8885
75.193	96.8215	75.6031	97.16	70.774	97.2717	70.4698	97.3686	76.2012	96.6058	75.1058	96.7904	82.1057	96.0966	92.1435	95.656		74.9565	97.01		70.5355	97.3325		75.9613	96.7125		81.8633	95.8845
75.3128	96.8122	75.7196	97.1502	70.8881	97.266	70.584	97.3621	76.3174	96.5994	75.2193	96.7825	82.2233	96.0912	92.2724	95.6535		75.0769	97.0004		70.6547	97.3262		76.0808	96.7052		81.9858	95.8805
75.4287	96.8028	75.8353	97.1405	71.007	97.2602	70.7025	97.3556	76.4356	96.593	75.34	96.7747	82.3429	96.0861	92.4006	95.6512		75.193	96.9908		70.774	97.3202		76.2012	96.6981		82.1057	95.8763
75.548	96.7935	75.9548	97.1308	71.1208	97.2542	70.8204	97.3492	76.5541	96.5868	75.4584	96.7669	82.4613	96.0813	92.5325	95.6487		75.3128	96.9812		70.8881	97.3141		76.3174	96.691		82.2233	95.8723
75.6626	96.7843	76.0721	97.1209	71.2387	97.2478	70.9407	97.3428	76.6712	96.5803	75.5734	96.7594	82.5772	96.0762	92.6643	95.646		75.4287	96.9716		71.007	97.3079		76.4356	96.6839		82.3429	95.8687
75.7802	96.7753	76.1861	97.1112	71.3578	97.2413	71.0528	97.3366	76.7908	96.5738	75.6914	96.7518	82.7009	96.0711	92.7959	95.6432		75.548	96.9621		71.1208	97.3017		76.5541	96.6769		82.4613	95.865
75.8962	96.7662	76.3054	97.1013	71.4771	97.2346	71.1695	97.3304	76.9054	96.5674	75.8114	96.7441	82.8207	96.0661	92.9227	95.6407		75.6626	96.9526		71.2387	97.2953		76.6712	96.6698		82.5772	95.8611
76.016	96.7571	76.4201	97.0915	71.59	97.2282	71.2889	97.3242	77.0284	96.5607	75.931	96.7365	82.9414	96.0612	93.0561	95.6382		75.7802	96.9432		71.3578	97.2889		76.7908	96.6628		82.7009	95.8572
76.1347	96.7481	76.5363	97.0818	71.7072	97.2217	71.4026	97.3183	77.1459	96.5542	76.0533	96.7291	83.0567	96.0564	93.1877	95.6355		75.8962	96.9337		71.4771	97.2825		76.9054	96.6557		82.8207	95.8534
76.2492	96.7392	76.6506	97.0721	71.826	97.2149	71.5133	97.3126	77.2637	96.5479	76.1663	96.7215	83.1801	96.0515	93.3219	95.6327		76.016	96.9243		71.59	97.2762		77.0284	96.6486		82.9414	95.8497
76.3692	96.7302	76.7712	97.0624	71.9446	97.2086	71.6368	97.3067	77.3798	96.5416	76.2888	96.7142	83.2975	96.0467	93.4523	95.6301		76.1347	96.9149		71.7072	97.27		77.1459	96.6416		83.0567	95.846
76.4853	96.7215	76.8907	97.0528	72.056	97.2026	71.7579	97.3007	77.4989	96.5354	76.4077	96.7068	83.42	96.0421	93.5795	95.627		76.2492	96.9057		71.826	97.2637		77.2637	96.6347		83.1801	95.8421
76.6029	96.7127	77.0033	97.0431	72.1766	97.1964	71.8753	97.2949	77.6171	96.5294	76.5298	96.6994	83.5379	96.037	93.7139	95.6239		76.3692	96.8963		71.9446	97.2576		77.3798	96.6279		83.2975	95.8384
76.7201	96.704	77.1201	97.0335	72.2924	97.1907	71.9974	97.2894	77.7372	96.5234	76.6449	96.6921	83.6544	96.0322	93.8436	95.621		76.4853	96.8871		72.056	97.2516		77.4989	96.6211		83.42	95.8345
76.8432	96.6952	77.2397	97.024	72.4142	97.1855	72.1172	97.2837	77.8564	96.5173	76.7637	96.6847	83.7741	96.0274	93.9759	95.6183		76.6029	96.8779		72.1766	97.2456		77.6171	96.6144		83.5379	95.8305
76.9596	96.6862	77.3538	97.0146	72.5347	97.18	72.2312	97.2776	77.9755	96.5109	76.8806	96.6774	83.8962	96.0225	94.1073	95.6157		76.7201	96.8688		72.2924	97.2401		77.7372	96.6078		83.6544	95.8266
77.0746	96.6775	77.4728	97.0051	72.6508	97.1748	72.3504	97.2718	78.0932	96.5046	77.0059	96.6701	84.014	96.0177	94.24	95.6129		76.8432	96.8596		72.4142	97.2346		77.8564	96.601		83.7741	95.8229
77.1911	96.6685	77.5858	96.9958	72.7633	97.1699	72.4669	97.2659	78.2073	96.4985	77.1223	96.6629	84.1338	96.0126	94.3705	95.6101		76.9596	96.8504		72.5347	97.2288		77.9755	96.5942		83.8962	95.8191
77.3101	96.6599	77.7093	96.9865	72.8914	97.1654	72.5881	97.2599	78.3277	96.4926	77.2394	96.6558	84.2462	96.0081	94.5013	95.6076		77.0746	96.8413		72.6508	97.2233		78.0932	96.5873		84.014	95.8153
77.4273	96.651	77.8204	96.9769	73.0052	97.1608	72.7023	97.2536	78.4499	96.4867	77.3557	96.6489	84.3707	96.0035	94.627	95.6048		77.1911	96.8322		72.7633	97.2179		78.2073	96.5807		84.1338	95.8113
77.546	96.642	77.9392	96.9673	73.1222	97.156	72.8189	97.2476	78.5648	96.4806	77.4757	96.6419	84.486	95.9989	94.7618	95.6024		77.3101	96.8232		72.8914	97.2126		78.3277	96.5742		84.2462	95.8078
77.6586	96.6333	78.058	96.9578	73.2394	97.1508	72.9378	97.2419	78.681	96.4748	77.595	96.635	84.6082	95.9941	94.8943	95.6007		77.4273	96.8139		73.0052	97.2072		78.4499	96.5678		84.3707	95.8042
77.7781	96.6243	78.1726	96.9482	73.3566	97.1463	73.0576	97.2359	78.8047	96.4687	77.7152	96.6281	84.7259	95.9893	95.0263	95.5986		77.546	96.8047		73.1222	97.2018		78.5648	96.5613		84.486	95.8007
77.8922	96.6151	78.2912	96.9387	73.4756	97.1418	73.1747	97.2298	78.9242	96.4628	77.8309	96.6213	84.8449	95.9849	95.1595	95.5965		77.6586	96.7956		73.2394	97.1963		78.681	96.5549		84.6082	95.7974
78.0126	96.606	78.4095	96.9293	73.5961	97.1368	73.2891	97.2239	79.0419	96.4571	77.9501	96.6146	84.9603	95.9806	95.2893	95.5945		77.7781	96.7862		73.3566	97.1911		78.8047	96.5484		84.7259	95.794
78.1329	96.597	78.5192	96.9198	73.7117	97.1328	73.4114	97.2182	79.1588	96.4516	78.0644	96.6078	85.0792	95.9766	95.4213	95.5926		77.8922	96.7769		73.4756	97.1858		78.9242	96.5421		84.8449	95.7907
78.2529	96.5883	78.6375	96.9103	73.8329	97.1288	73.5297	97.2121	79.2795	96.4463	78.1903	96.6011	85.198	95.9727	95.5516	95.5904		78.0126	96.7676		73.5961	97.1804		79.0419	96.5359		84.9603	95.7875
78.3667	96.5798	78.761	96.9007	73.9474	97.1239	73.6513	97.2064	79.3959	96.4408	78.3099	96.5945	85.3214	95.9691	95.6836	95.5884		78.1329	96.7584		73.7117	97.1755		79.1588	96.5297		85.0792	95.7846
78.4865	96.5709	78.8729	96.8912	74.0694	97.1193	73.7664	97.2009	79.5159	96.4352	78.4297	96.5879	85.4373	95.965	95.8136	95.5863		78.2529	96.7493		73.8329	97.1705		79.2795	96.5237		85.198	95.7816
78.6028	96.5621	78.9926	96.8819	74.182	97.1148	73.887	97.1956	79.6343	96.4297	78.5518	96.581	85.5594	95.9609	95.9445	95.5845		78.3667	96.7402		73.9474	97.1652		79.3959	96.5176		85.3214	95.7787
78.7224	96.5536	79.1118	96.8725	74.3027	97.1106	74.0037	97.1899	79.7523	96.4242	78.6711	96.5743	85.6793	95.9568	96.0767	95.5823		78.4865	96.731		74.0694	97.1601		79.5159	96.5115		85.4373	95.7756
78.8409	96.5451	79.2257	96.8631	74.4236	97.1066	74.1227	97.1843	79.8706	96.4187	78.7889	96.5676	85.8	95.9528	96.2095	95.5795		78.6028	96.722		74.182	97.1552		79.6343	96.5053		85.5594	95.7727
78.9556	96.5367	79.345	96.8538	74.5431	97.1019	74.2446	97.1789	79.9933	96.4134	78.905	96.5609	85.909	95.9489	96.3412	95.5771		78.7224	96.7131		74.3027	97.1503		79.7523	96.4992		85.6793	95.7696
79.0798	96.5284	79.464	96.8445	74.6589	97.0971	74.3633	97.1733	80.1112	96.4081	79.0273	96.5544	86.0286	95.9448	96.4709	95.5748		78.8409	96.7041		74.4236	97.1454		79.8706	96.4932		85.8	95.7662
79.1938	96.5199	79.5822	96.8353	74.7808	97.0926	74.4809	97.1679	80.2322	96.4026	79.1452	96.5478	86.1476	95.9408	96.6065	95.5723		78.9556	96.6952		74.5431	97.1404		79.9933	96.4872		85.909	95.763
79.3136	96.5116	79.6965	96.8258	74.8987	97.0879	74.5987	97.1627	80.3503	96.3973	79.2664	96.5412	86.2725	95.9367	96.7368	95.5696		79.0798	96.6864		74.6589	97.1352		80.1112	96.4813		86.0286	95.7598
79.4299	96.5032	79.815	96.8165	75.0199	97.0834	74.7201	97.1577	80.4636	96.3918	79.3848	96.5346	86.3887	95.9325	96.8652	95.5673		79.1938	96.6776		74.7808	97.1303		80.2322	96.4752		86.1476	95.7566
79.5507	96.4949	79.9339	96.8073	75.137	97.0794	74.8396	97.1523	80.5818	96.3868	79.501	96.5278	86.5096	95.928	96.9989	95.5649		79.3136	96.6687		74.8987	97.1253		80.3503	96.4693		86.2725	95.7532
79.6668	96.4866	80.0485	96.7979	75.2572	97.0746	74.9557	97.1471	80.7003	96.3818	79.6234	96.5211	86.6244	95.9238	97.1266	95.5628		79.4299	96.6598		75.0199	97.1205		80.4636	96.4632		86.3887	95.7499
79.7867	96.4778	80.1679	96.7885	75.3766	97.0697	75.0809	97.1419	80.8199	96.3769	79.7411	96.5147	86.7438	95.92	97.2611	95.5607		79.5507	96.6511		75.137	97.1158		80.5818	96.4573		86.5096	95.7465
79.9056	96.4697	80.2837	96.7791	75.497	97.0646	75.2026	97.1372	80.9425	96.3721	79.8631	96.5082	86.8628	95.9163	97.3933	95.5584		79.6668	96.6423		75.2572	97.1108		80.7003	96.4514		86.6244	95.7433
80.0224	96.4612	80.4031	96.7698	75.6178	97.0596	75.3163	97.1324	81.0621	96.3671	79.9838	96.5018	86.9842	95.9129	97.5263	95.5566		79.7867	96.6332		75.3766	97.1058		80.8199	96.4458		86.7438	95.7404
80.1414	96.4526	80.5179	96.7603	75.7387	97.0549	75.4376	97.1276	81.1814	96.3619	80.1019	96.4954	87.1009	95.9094	97.6528	95.5548		79.9056	96.6244		75.497	97.1009		80.9425	96.4402		86.8628	95.7373
80.2618	96.4441	80.6347	96.751	75.8555	97.0503	75.5544	97.1228	81.3008	96.3568	80.2198	96.4888	87.2217	95.9057	97.7853	95.5531		80.0224	96.6155		75.6178	97.096		81.0621	96.4345		86.9842	95.7348
80.3785	96.4356	80.7591	96.7415	75.9834	97.0452	75.6782	97.1177	81.4187	96.352	80.3436	96.4823	87.3388	95.9019	97.9217	95.5514		80.1414	96.6065		75.7387	97.0913		81.1814	96.4287		87.1009	95.7321
80.4952	96.4271	80.8763	96.7321	76.0969	97.0403	75.7993	97.1123	81.5361	96.3471	80.4591	96.4762	87.4614	95.8982	98.0538	95.5498		80.2618	96.5975		75.8555	97.0866		81.3008	96.4228		87.2217	95.7294
80.6159	96.4182	80.9926	96.7227	76.2109	97.0353	75.9224	97.1069	81.657	96.3423	80.5769	96.47	87.5763	95.8946	98.1833	95.5479		80.3785	96.5885		75.9834	97.0815		81.4187	96.4172		87.3388	95.7266
80.7362	96.4095	81.1111	96.7132	76.3355	97.03	76.037	97.102	81.7762	96.3372	80.7002	96.4637	87.7003	95.891	98.3169	95.546		80.4952	96.5796		76.0969	97.0763		81.5361	96.4116		87.4614	95.724
80.8527	96.4012	81.2279	96.7038	76.4567	97.0253	76.1533	97.0969	81.8982	96.332	80.8197	96.4574	87.8151	95.8872	98.4458	95.5439		80.6159	96.5704		76.2109	97.0711		81.657	96.4061		87.5763	95.7212
80.9748	96.3936	81.3455	96.6946	76.5673	97.0205	76.2767	97.0917	82.0132	96.327	80.9378	96.4514	87.9358	95.8833	98.5764	95.5415		80.7362	96.5614		76.3355	97.066		81.7762	96.4005		87.7003	95.7185
81.0882	96.3847	81.4679	96.6854	76.6945	97.0157	76.394	97.0859	82.1361	96.3219	81.0597	96.4452	88.0539	95.8794	98.7104	95.5398		80.8527	96.5525		76.4567	97.0611		81.8982	96.3947		87.8151	95.7156
81.2072	96.3763	81.581	96.6763	76.814	97.0113	76.5159	97.0807	82.2547	96.317	81.1799	96.4392	88.1719	95.8756	98.8422	95.5381		80.9748	96.5441		76.5673	97.0561		82.0132	96.3892		87.9358	95.7124
81.3291	96.368	81.6989	96.6673	76.9356	97.007	76.6356	97.0756	82.3738	96.3126	81.2945	96.4335	88.2927	95.8718	98.9726	95.536		81.0882	96.535		76.6945	97.0508		82.1361	96.3835		88.0539	95.7096
81.4444	96.3597	81.818	96.6582	77.0532	97.0026	76.7546	97.0704	82.4904	96.308	81.4179	96.4277	88.4142	95.8682	99.105	95.534		81.2072	96.5263		76.814	97.046		82.2547	96.3781		88.1719	95.7068
81.5657	96.3517	81.9371	96.6492	77.1754	96.9986	76.8747	97.0651	82.6142	96.3034	81.5397	96.422	88.5255	95.8649	99.2372	95.532		81.3291	96.5176		76.9356	97.0413		82.3738	96.373		88.2927	95.7039
81.6846	96.3439	82.0566	96.6402	77.2947	96.9944	76.9991	97.0603	82.7336	96.2989	81.663	96.4163	88.6532	95.8617	99.3657	95.5301		81.4444	96.509		77.0532	97.0365		82.4904	96.3679		88.4142	95.7011
81.8009	96.3363	82.1712	96.6312	77.4141	96.9901	77.1193	97.0553	82.8511	96.2944	81.7802	96.4106	88.77	95.8583	99.5	95.5281		81.5657	96.5005		77.1754	97.0319		82.6142	96.3627		88.5255	95.6985
81.9223	96.3287	82.2922	96.6223	77.538	96.9862	77.2399	97.0502	82.9756	96.2901	81.8994	96.4051	88.8945	95.855	99.6304	95.5265		81.6846	96.492		77.2947	97.0274		82.7336	96.3576		88.6532	95.6959
82.0427	96.3205	82.4174	96.6132	77.6565	96.9818	77.3648	97.0452	83.0946	96.2857	82.0241	96.3997	89.0108	95.8518	99.7691	95.5245		81.8009	96.4838		77.4141	97.0227		82.8511	96.3525		88.77	95.6932
82.1615	96.3124	82.5321	96.6043	77.7765	96.978	77.4833	97.0403	83.2167	96.281	82.1426	96.3942	89.1283	95.8489	99.8947	95.5228		81.9223	96.4755		77.538	97.0182		82.9756	96.3476		88.8945	95.6908
82.28	96.305	82.6494	96.5952	77.9012	96.9744	77.6066	97.0356	83.3342	96.2763	82.2625	96.3888	89.2496	95.8459	100.028	95.5207		82.0427	96.4669		77.6565	97.0135		83.0946	96.3427		89.0108	95.6882
82.4006	96.2974	82.7677	96.5862	78.0191	96.9706	77.7243	97.0307	83.4547	96.2715	82.3822	96.3836	89.3689	95.8428	100.155	95.519		82.1615	96.4584		77.7765	97.0092		83.2167	96.3376		89.1283	95.6858
82.5142	96.2895	82.8882	96.5771	78.1434	96.9665	77.8445	97.0255	83.574	96.2669	82.5061	96.3779	89.4872	95.8398	100.289	95.5172		82.28	96.4501		77.9012	97.005		83.3342	96.3325		89.2496	95.6833
82.6351	96.2815	83.0052	96.568	78.263	96.9627	77.9681	97.0208	83.6951	96.2624	82.6267	96.3725	89.6092	95.8368	100.418	95.5156		82.4006	96.4418		78.0191	97.0006		83.4547	96.3275		89.3689	95.6809
82.7583	96.2732	83.1245	96.5592	78.3886	96.9591	78.0904	97.0161	83.8139	96.258	82.7458	96.3671	89.727	95.8336	100.552	95.5138		82.5142	96.4333		78.1434	96.996		83.574	96.3224		89.4872	95.6785
82.8771	96.2651	83.2448	96.5503	78.5074	96.9557	78.2129	97.0115	83.9343	96.2536	82.8655	96.3617	89.8517	95.8302	100.682	95.5117		82.6351	96.4247		78.263	96.9917		83.6951	96.3174		89.6092	95.6762
82.9928	96.257	83.3637	96.5414	78.6324	96.9519	78.3361	97.0071	84.0529	96.2491	82.9857	96.3562	89.9636	95.827	100.814	95.5101		82.7583	96.4162		78.3886	96.9876		83.8139	96.3126		89.727	95.6737
83.1138	96.2487	83.4804	96.5324	78.7505	96.9485	78.4571	97.0025	84.1738	96.2448	83.1071	96.351	90.0848	95.8238	100.946	95.5082		82.8771	96.4077		78.5074	96.9836		83.9343	96.3076		89.8517	95.671
83.2334	96.241	83.5985	96.5236	78.8735	96.9453	78.5777	96.9981	84.2962	96.2406	83.2303	96.3456	90.206	95.8209	101.08	95.5065		82.9928	96.3992		78.6324	96.9795		84.0529	96.3027		89.9636	95.6685
83.353	96.2329	83.7177	96.5147	78.996	96.9418	78.6946	96.9937	84.4145	96.2364	83.3527	96.34	90.3267	95.818	101.206	95.5051		83.1138	96.3905		78.7505	96.9755		84.1738	96.2979		90.0848	95.666
83.4751	96.2247	83.8384	96.5061	79.1232	96.9388	78.8251	96.9893	84.5411	96.2326	83.4762	96.3347	90.4466	95.815	101.339	95.5032		83.2334	96.3823		78.8735	96.9717		84.2962	96.2931		90.206	95.6637
83.5915	96.2166	83.96	96.4973	79.2407	96.9355	78.9463	96.9848	84.6578	96.2288	83.5965	96.3291	90.5653	95.8121	101.473	95.501		83.353	96.3738		78.996	96.9677		84.4145	96.2882		90.3267	95.6615
83.7106	96.2085	84.0761	96.4886	79.3665	96.9327	79.0709	96.9806	84.778	96.2247	83.72	96.324	90.6812	95.8093	101.606	95.4994		83.4751	96.3654		79.1232	96.9641		84.5411	96.2836		90.4466	95.6591
83.8346	96.2006	84.1982	96.4797	79.4818	96.9296	79.192	96.9761	84.9029	96.2206	83.8403	96.3187	90.8062	95.8069	101.735	95.4978		83.5915	96.3569		79.2407	96.9602		84.6578	96.279		90.5653	95.6565
83.9558	96.1932	84.3204	96.4707	79.6113	96.9258	79.3169	96.9719	85.0212	96.2165	83.9637	96.3134	90.9253	95.8045	101.865	95.4965		83.7106	96.3486		79.3665	96.9566		84.778	96.2744		90.6812	95.6543
84.0746	96.1853	84.4376	96.4618	79.7295	96.9219	79.4368	96.9675	85.1419	96.2122	84.0799	96.3079	91.0486	95.802	101.996	95.4954		83.8346	96.3401		79.4818	96.9528		84.9029	96.2697		90.8062	95.6523
84.1964	96.1774	84.5605	96.4531	79.8517	96.918	79.5586	96.9632	85.2648	96.2081	84.2037	96.3025	91.1668	95.7993	102.125	95.4942		83.9558	96.332		79.6113	96.9489		85.0212	96.2649		90.9253	95.6505
84.3163	96.1694	84.6789	96.4444	79.975	96.9137	79.6799	96.9588	85.3846	96.2039	84.3238	96.2973	91.2883	95.7966	102.259	95.493		84.0746	96.3236		79.7295	96.9447		85.1419	96.26		91.0486	95.6487
84.4385	96.1613	84.7974	96.4358	80.0978	96.9088	79.8052	96.9546	85.5047	96.2001	84.4504	96.2922	91.4079	95.7936	102.39	95.4918		84.1964	96.3152		79.8517	96.9406		85.2648	96.2553		91.1668	95.6468
84.5557	96.1533	84.9157	96.4271	80.2216	96.9039	79.9281	96.9504	85.6253	96.1964	84.5649	96.2871	91.5273	95.7907	102.519	95.4906		84.3163	96.3069		79.975	96.9363		85.3846	96.2506		91.2883	95.6448
84.6792	96.1453	85.0392	96.4183	80.3434	96.8982	80.054	96.9465	85.7486	96.1926	84.6895	96.2822	91.6453	95.7878	102.654	95.4897		84.4385	96.2986		80.0978	96.9317		85.5047	96.2461		91.4079	95.6427
84.799	96.1373	85.1603	96.4097	80.4723	96.8932	80.1788	96.9425	85.8662	96.1888	84.8137	96.2773	91.7677	95.7848	102.785	95.4887		84.5557	96.2902		80.2216	96.9272		85.6253	96.2417		91.5273	95.6406
84.9185	96.1296	85.2858	96.401	80.5962	96.8878	80.3027	96.9382	85.9859	96.1848	84.9353	96.2726	91.8827	95.7824	102.918	95.4875		84.6792	96.2818		80.3434	96.9224		85.7486	96.2374		91.6453	95.6387
85.041	96.1218	85.3995	96.3925	80.7161	96.883	80.4211	96.9342	86.1129	96.181	85.0524	96.2679	92.0065	95.7793	103.047	95.4861		84.799	96.2735		80.4723	96.9178		85.8662	96.2331		91.7677	95.6368
85.1574	96.1141	85.5232	96.3841	80.8407	96.8783	80.5517	96.93	86.2313	96.1774	85.1779	96.2632	92.1266	95.7764	103.177	95.4847		84.9185	96.2653		80.5962	96.913		85.9859	96.2287		91.8827	95.635
85.2754	96.1069	85.6401	96.3757	80.9639	96.8736	80.6714	96.9257	86.3549	96.1738	85.2972	96.2585	92.2487	95.7737	103.308	95.4832		85.041	96.2572		80.7161	96.9086		86.1129	96.2245		92.0065	95.6327
85.3963	96.0996	85.7574	96.3673	81.0902	96.8699	80.7942	96.9212	86.4793	96.1701	85.421	96.254	92.37	95.7711	103.441	95.4816		85.1574	96.2491		80.8407	96.9041		86.2313	96.2203		92.1266	95.6305
85.5148	96.0922	85.8865	96.3587	81.2102	96.8663	80.9129	96.9172	86.5951	96.1665	85.5415	96.2494	92.4871	95.7686	103.569	95.4802		85.2754	96.2413		80.9639	96.8996		86.3549	96.2162		92.2487	95.6285
85.6417	96.085	86.0077	96.35	81.3386	96.8635	81.0425	96.9128	86.7216	96.1629	85.6665	96.2449	92.6043	95.7662	103.702	95.4789		85.3963	96.2335		81.0902	96.8956		86.4793	96.212		92.37	95.6264
85.7577	96.0777	86.1274	96.3414	81.4605	96.8606	81.1669	96.9083	86.8393	96.1592	85.7886	96.2403	92.7252	95.7639	103.833	95.4774		85.5148	96.2254		81.2102	96.8918		86.5951	96.2079		92.4871	95.6244
85.8804	96.0703	86.2449	96.3328	81.5894	96.858	81.287	96.9038	86.9616	96.1553	85.9096	96.2356	92.8467	95.7618	103.967	95.4759		85.6417	96.2175		81.3386	96.8881		86.7216	96.2039		92.6043	95.6225
86.0022	96.0629	86.3674	96.3241	81.7083	96.8555	81.4114	96.8995	87.0786	96.1516	86.0327	96.2308	92.9661	95.7595	104.095	95.4746		85.7577	96.2095		81.4605	96.8845		86.8393	96.1997		92.7252	95.6207
86.1266	96.0557	86.4892	96.3155	81.8322	96.8531	81.5354	96.8953	87.2032	96.1481	86.1563	96.2259	93.0884	95.7569	104.226	95.4729		85.8804	96.2016		81.5894	96.8809		86.9616	96.1955		92.8467	95.6189
86.2437	96.0487	86.6103	96.3071	81.9545	96.8499	81.6662	96.8912	87.3269	96.1446	86.2809	96.2212	93.2114	95.7546	104.355	95.4715		86.0022	96.1935		81.7083	96.8775		87.0786	96.1912		92.9661	95.617
86.3653	96.0413	86.7353	96.2986	82.0817	96.8473	81.7848	96.8871	87.4482	96.1411	86.4037	96.2168	93.331	95.7524	104.486	95.4699		86.1266	96.1856		81.8322	96.8742		87.2032	96.187		93.0884	95.6149
86.4906	96.0339	86.8538	96.2901	82.2066	96.8454	81.9128	96.8832	87.5735	96.1377	86.5273	96.2125	93.455	95.7503	104.616	95.4683		86.2437	96.1779		81.9545	96.8705		87.3269	96.1829		93.2114	95.6131
86.6156	96.0265	86.973	96.2817	82.3304	96.8428	82.0371	96.8796	87.6932	96.1343	86.6492	96.2079	93.574	95.7483	104.748	95.4668		86.3653	96.17		82.0817	96.8672		87.4482	96.1789		93.331	95.6112
86.7286	96.0195	87.0964	96.2733	82.4563	96.8404	82.1613	96.8759	87.8128	96.1308	86.7719	96.2034	93.6926	95.746	104.88	95.4651		86.4906	96.162		82.2066	96.8643		87.5735	96.1751		93.455	95.6093
86.8533	96.0121	87.2166	96.2648	82.5818	96.8381	82.2901	96.8719	87.9347	96.127	86.8959	96.1988	93.8115	95.7436	105.014	95.4637		86.6156	96.1541		82.3304	96.8612		87.6932	96.1711		93.574	95.6075
86.9753	96.0052	87.3408	96.2564	82.704	96.8355	82.4125	96.8683	88.0577	96.1235	87.0129	96.1944	93.9324	95.7413	105.141	95.462		86.7286	96.1464		82.4563	96.8581		87.8128	96.1671		93.6926	95.6056
87.1001	95.9982	87.459	96.2479	82.8337	96.8329	82.5402	96.8643	88.1817	96.1203	87.1372	96.1901	94.0554	95.739	105.273	95.4606		86.8533	96.1385		82.5818	96.855		87.9347	96.1629		93.8115	95.6037
87.2201	95.9912	87.5838	96.2396	82.9559	96.8298	82.6693	96.8605	88.2996	96.1172	87.2615	96.1861	94.179	95.737	105.4	95.4591		86.9753	96.1308		82.704	96.8519		88.0577	96.1589		93.9324	95.6016
87.3417	95.9842	87.704	96.2314	83.0844	96.8263	82.7916	96.8568	88.4233	96.1142	87.39	96.182	94.2951	95.7348	105.533	95.458		87.1001	96.123		82.8337	96.8486		88.1817	96.1552		94.0554	95.5998
87.4599	95.9773	87.8223	96.2227	83.2082	96.8234	82.9169	96.8528	88.5424	96.1111	87.5109	96.1778	94.4176	95.7325	105.662	95.4565		87.2201	96.1154		82.9559	96.8452		88.2996	96.1516		94.179	95.598
87.5822	95.9706	87.948	96.2143	83.3356	96.8202	83.0427	96.8491	88.6688	96.1079	87.6353	96.1737	94.5397	95.7302	105.796	95.4551		87.3417	96.1078		83.0844	96.8415		88.4233	96.1481		94.2951	95.5964
87.7054	95.9635	88.0695	96.2059	83.4605	96.8167	83.1691	96.8455	88.7912	96.1047	87.7634	96.1695	94.6605	95.728	105.924	95.4536		87.4599	96.1		83.2082	96.8381		88.5424	96.1444		94.4176	95.5945
87.8308	95.9567	88.1895	96.1973	83.5878	96.8137	83.2962	96.8418	88.9139	96.1017	87.8835	96.1657	94.7833	95.7261	106.054	95.4522		87.5822	96.0924		83.3356	96.8347		88.6688	96.1408		94.5397	95.5926
87.9531	95.9497	88.3156	96.1889	83.7088	96.8107	83.4207	96.8379	89.0383	96.0987	88.0059	96.1618	94.9039	95.7243	106.181	95.451		87.7054	96.0847		83.4605	96.8311		88.7912	96.1371		94.6605	95.5908
88.0726	95.9425	88.4345	96.1807	83.8404	96.8072	83.5466	96.8345	89.1562	96.096	88.1255	96.1579	95.0266	95.7225	106.314	95.4497		87.8308	96.077		83.5878	96.8278		88.9139	96.1337		94.7833	95.5891
88.1941	95.9354	88.5574	96.1724	83.9602	96.8045	83.6733	96.8309	89.2832	96.0934	88.2517	96.1542	95.1478	95.7206	106.443	95.4487		87.9531	96.0693		83.7088	96.8243		89.0383	96.1302		94.9039	95.5877
88.3174	95.9282	88.6813	96.1642	84.0922	96.8014	83.7985	96.8277	89.4089	96.0905	88.3795	96.1504	95.2697	95.7187	106.577	95.4476		88.0726	96.0616		83.8404	96.8209		89.1562	96.1269		95.0266	95.5861
88.4379	95.921	88.8016	96.1557	84.215	96.7981	83.9234	96.8244	89.5265	96.0874	88.5004	96.1464	95.3935	95.7166	106.705	95.4466		88.1941	96.0539		83.9602	96.8177		89.2832	96.1238		95.1478	95.5847
88.5592	95.9139	88.9305	96.1474	84.3413	96.7947	84.0508	96.8211	89.6509	96.0841	88.6281	96.1426	95.5076	95.7146	106.837	95.4454		88.3174	96.0462		84.0922	96.8145		89.4089	96.1204		95.2697	95.5832
88.6844	95.9064	89.0504	96.1393	84.4658	96.791	84.177	96.8179	89.7751	96.081	88.7473	96.1389	95.6359	95.7125	106.968	95.4447		88.4379	96.0384		84.215	96.8113		89.5265	96.1169		95.3935	95.5816
88.8061	95.8988	89.1731	96.1311	84.5979	96.7875	84.3003	96.8142	89.8962	96.0781	88.8711	96.1348	95.7562	95.7102	107.095	95.4438		88.5592	96.0307		84.3413	96.8079		89.6509	96.1133		95.5076	95.58
88.9296	95.8912	89.2958	96.1231	84.7209	96.7835	84.4289	96.8106	90.0245	96.0752	88.9975	96.1309	95.8784	95.7081	107.229	95.4429		88.6844	96.0228		84.4658	96.8044		89.7751	96.1099		95.6359	95.5786
89.0491	95.8839	89.4161	96.115	84.8486	96.7797	84.5559	96.8072	90.145	96.0721	89.1223	96.127	95.9968	95.7058	107.358	95.4419		88.8061	96.015		84.5979	96.8008		89.8962	96.1065		95.7562	95.577
89.1745	95.8763	89.5403	96.1069	84.9703	96.776	84.6834	96.8039	90.2718	96.069	89.247	96.1233	96.1213	95.7038	107.486	95.4409		88.9296	96.0071		84.7209	96.797		90.0245	96.1031		95.8784	95.5755
89.3003	95.8692	89.6607	96.0988	85.0989	96.7729	84.811	96.8004	90.3939	96.0659	89.3686	96.1195	96.2436	95.7022	107.617	95.4399		89.0491	95.9994		84.8486	96.7935		90.145	96.0995		95.9968	95.5739
89.4194	95.8621	89.7846	96.0909	85.2306	96.7693	84.9382	96.7969	90.5165	96.063	89.4955	96.1157	96.3663	95.7006	107.749	95.4389		89.1745	95.9916		84.9703	96.79		90.2718	96.0961		96.1213	95.5724
89.5423	95.855	89.909	96.0829	85.3547	96.7662	85.0684	96.7935	90.64	96.0601	89.6188	96.1117	96.4859	95.6987	107.874	95.4377		89.3003	95.984		85.0989	96.7866		90.3939	96.0927		96.2436	95.5711
89.6678	95.8481	90.0331	96.0751	85.4824	96.7633	85.1904	96.79	90.763	96.0576	89.7391	96.1078	96.6063	95.6971	108.004	95.4365		89.4194	95.9765		85.2306	96.7831		90.5165	96.0893		96.3663	95.5697
89.7866	95.8411	90.1522	96.0672	85.6118	96.7614	85.3195	96.7866	90.8882	96.0553	89.8671	96.104	96.7302	95.6955	108.135	95.4355		89.5423	95.969		85.3547	96.7798		90.64	96.0859		96.4859	95.5682
89.9122	95.8345	90.2765	96.0592	85.7334	96.7594	85.448	96.7828	91.0084	96.0531	89.9888	96.1002	96.857	95.6941	108.266	95.4341		89.6678	95.9616		85.4824	96.7766		90.763	96.0827		96.6063	95.5668
90.0317	95.8278	90.4027	96.0512	85.8625	96.7577	85.5732	96.7797	91.1352	96.0503	90.1166	96.0966	96.9721	95.6927	108.399	95.4329		89.7866	95.9541		85.6118	96.774		90.8882	96.0797		96.7302	95.5655
90.1603	95.8216	90.5259	96.043	85.9918	96.7561	85.7009	96.7766	91.2574	96.048	90.2424	96.0931	97.0962	95.6914	108.529	95.4321		89.9122	95.9468		85.7334	96.7711		91.0084	96.0767		96.857	95.5641
90.28	95.8149	90.6478	96.0351	86.1189	96.7542	85.8286	96.7731	91.3778	96.0458	90.3655	96.0894	97.2175	95.6898	108.653	95.4314		90.0317	95.9395		85.8625	96.7687		91.1352	96.0735		96.9721	95.5628
90.4044	95.8085	90.77	96.0273	86.2451	96.7525	85.953	96.7698	91.5044	96.0432	90.4918	96.0856	97.3417	95.6879	108.785	95.4304		90.1603	95.9323		85.9918	96.7664		91.2574	96.0705		97.0962	95.5618
90.5323	95.8022	90.8935	96.0194	86.3774	96.7501	86.084	96.7665	91.6284	96.0408	90.6162	96.082	97.462	95.6861	108.916	95.4293		90.28	95.925		86.1189	96.7637		91.3778	96.0676		97.2175	95.5606
90.6511	95.7957	91.0164	96.0114	86.5036	96.7482	86.213	96.7632	91.7511	96.0383	90.744	96.0783	97.5907	95.6843	109.042	95.4284		90.4044	95.9179		86.2451	96.7611		91.5044	96.0644		97.3417	95.5591
90.7709	95.7897	91.1437	96.0036	86.634	96.7464	86.3392	96.7599	91.8767	96.0357	90.8715	96.075	97.7129	95.6825	109.173	95.4277		90.5323	95.9108		86.3774	96.7583		91.6284	96.0614		97.462	95.5577
90.8998	95.7835	91.2655	95.9958	86.7596	96.7444	86.4656	96.7568	91.999	96.0329	90.9962	96.0716	97.8329	95.6805	109.301	95.4271		90.6511	95.9035		86.5036	96.7557		91.7511	96.0583		97.5907	95.5564
91.0198	95.7771	91.3902	95.9881	86.888	96.7422	86.5941	96.7538	92.1223	96.0301	91.1233	96.0683	97.9559	95.6786	109.43	95.4264		90.7709	95.8966		86.634	96.7531		91.8767	96.0553		97.7129	95.5551
91.144	95.7706	91.5142	95.9804	87.0127	96.7404	86.7214	96.7512	92.2445	96.0273	91.2487	96.0649	98.0809	95.6767	109.558	95.4258		90.8998	95.8896		86.7596	96.7506		91.999	96.0523		97.8329	95.5538
91.2682	95.7642	91.6367	95.9727	87.1432	96.7382	86.856	96.7482	92.3689	96.025	91.3746	96.0617	98.199	95.6752	109.689	95.4256		91.0198	95.8826		86.888	96.748		92.1223	96.0492		97.9559	95.5525
91.3854	95.7572	91.7583	95.965	87.266	96.7366	86.9817	96.7452	92.4979	96.0223	91.4952	96.0584	98.3214	95.6736	109.819	95.4249		91.144	95.8755		87.0127	96.7458		92.2445	96.0461		98.0809	95.5513
91.5134	95.7504	91.8813	95.9573	87.3961	96.7347	87.1091	96.7422	92.6202	96.0198	91.6208	96.0552	98.449	95.6722	109.952	95.424		91.2682	95.8685		87.1432	96.7432		92.3689	96.0434		98.199	95.5504
91.6374	95.7435	92.0084	95.9496	87.5252	96.7323	87.2358	96.7392	92.7423	96.0177	91.7469	96.0521	98.5724	95.6708	110.076	95.4236		91.3854	95.8611		87.266	96.7409		92.4979	96.0404		98.3214	95.5493
91.7621	95.7367	92.1265	95.9418	87.654	96.7307	87.3636	96.7364	92.8675	96.0158	91.8709	96.0488	98.6963	95.6694	110.206	95.4231		91.5134	95.8538		87.3961	96.7385		92.6202	96.0375		98.449	95.5481
91.888	95.7302	92.2532	95.9341	87.7791	96.7293	87.4888	96.7333	92.9921	96.0139	91.9946	96.0459	98.8201	95.6681	110.335	95.4222		91.6374	95.8466		87.5252	96.7357		92.7423	96.0349		98.5724	95.5472
92.0107	95.7233	92.3819	95.9266	87.9102	96.7277	87.6217	96.7303	93.1146	96.0118	92.1214	96.0429	98.9404	95.667	110.465	95.4213		91.7621	95.8393		87.654	96.7336		92.8675	96.0323		98.6963	95.5463
92.1327	95.7162	92.4991	95.9189	88.0378	96.7262	87.7477	96.727	93.241	96.01	92.2455	96.04	99.066	95.6659	110.593	95.4202		91.888	95.8322		87.7791	96.7313		92.9921	96.0299		98.8201	95.5452
92.2568	95.7092	92.628	95.9111	88.165	96.7246	87.8785	96.7236	93.3652	96.008	92.376	96.0368	99.1853	95.6643	110.719	95.4188		92.0107	95.8249		87.9102	96.729		93.1146	96.0273		98.9404	95.5441
92.3798	95.7024	92.7507	95.9036	88.297	96.7229	88.0058	96.7204	93.4888	96.0059	92.5001	96.0336	99.3095	95.6631	110.847	95.4177		92.1327	95.8176		88.0378	96.7266		93.241	96.025		99.066	95.5431
92.502	95.6958	92.8762	95.8959	88.4235	96.7208	88.1384	96.7173	93.6159	96.0037	92.6226	96.0306	99.434	95.6618	110.977	95.4166		92.2568	95.8102		88.165	96.7241		93.3652	96.0224		99.1853	95.5416
92.6316	95.6897	92.9957	95.8883	88.5571	96.7183	88.27	96.714	93.7395	96.0018	92.7485	96.0276	99.5601	95.6605	111.105	95.4159		92.3798	95.803		88.297	96.7217		93.4888	96.0198		99.3095	95.5404
92.7532	95.6837	93.1248	95.8805	88.6894	96.7161	88.4001	96.7109	93.8642	95.9998	92.8745	96.0246	99.6811	95.6592	111.234	95.4151		92.502	95.7958		88.4235	96.7191		93.6159	96.0172		99.434	95.5392
92.8749	95.6779	93.2497	95.873	88.8161	96.7138	88.5236	96.708	93.9902	95.9979	92.998	96.0216	99.8043	95.6579	111.365	95.4139		92.6316	95.789		88.5571	96.7161		93.7395	96.0147		99.5601	95.5382
92.9993	95.6721	93.3735	95.8657	88.945	96.7108	88.6563	96.7049	94.1173	95.9955	93.1259	96.0187	99.9302	95.6562	111.494	95.4126		92.7532	95.7821		88.6894	96.7135		93.8642	96.0122		99.6811	95.5371
93.128	95.6657	93.4962	95.8583	89.0744	96.7085	88.7834	96.7025	94.2382	95.9932	93.2475	96.0156	100.055	95.6547	111.622	95.4119		92.8749	95.7754		88.8161	96.7109		93.9902	96.0098		99.8043	95.5359
93.2516	95.6594	93.6236	95.8509	89.2058	96.7064	88.9166	96.7	94.3642	95.9912	93.3771	96.0126	100.177	95.6534	111.751	95.4111		92.9993	95.7689		88.945	96.7079		94.1173	96.0071		99.9302	95.5344
93.3712	95.6538	93.7421	95.8433	89.3346	96.7045	89.0428	96.6974	94.4889	95.9889	93.4996	96.0096	100.3	95.652	111.878	95.4105		93.128	95.762		89.0744	96.7055		94.2382	96.0044		100.055	95.5333
93.5023	95.6481	93.87	95.836	89.4638	96.7026	89.1748	96.6947	94.6158	95.9867	93.6232	96.0066	100.426	95.6514	112.006	95.4099		93.2516	95.7552		89.2058	96.7032		94.3642	96.0019		100.177	95.5322
93.6214	95.642	93.9934	95.8287	89.5915	96.7009	89.303	96.692	94.7388	95.9849	93.7548	96.0039	100.551	95.65	112.134	95.4091		93.3712	95.7486		89.3346	96.701		94.4889	95.9993		100.3	95.5312
93.7492	95.6359	94.1256	95.8213	89.722	96.6994	89.4297	96.6892	94.8655	95.983	93.8841	96.001	100.672	95.6489	112.258	95.4082		93.5023	95.742		89.4638	96.6986		94.6158	95.9967		100.426	95.5307
93.8738	95.6295	94.2459	95.8139	89.8494	96.6978	89.5609	96.6867	94.9872	95.9809	94.0079	95.9984	100.797	95.6478	112.389	95.4068		93.6214	95.7353		89.5915	96.6964		94.7388	95.9944		100.551	95.5296
93.9973	95.6233	94.3701	95.8066	89.9824	96.6966	89.691	96.6844	95.1132	95.9787	94.1364	95.9957	100.922	95.6468	112.514	95.4059		93.7492	95.7286		89.722	96.6943		94.8655	95.992		100.672	95.5285
94.1189	95.617	94.4971	95.799	90.1104	96.6953	89.8179	96.6819	95.2358	95.9763	94.2601	95.9929	101.045	95.6456	112.644	95.4051		93.8738	95.7217		89.8494	96.6923		94.9872	95.9897		100.797	95.5273
94.2465	95.6104	94.6241	95.7914	90.239	96.6941	89.9461	96.6794	95.3614	95.9744	94.385	95.9903	101.167	95.6444	112.775	95.4045		93.9973	95.715		89.9824	96.6905		95.1132	95.9872		100.922	95.5264
94.3746	95.6044	94.7454	95.784	90.3668	96.6918	90.0753	96.6766	95.4895	95.9723	94.5095	95.9879	101.294	95.6431	112.904	95.4036		94.1189	95.708		90.1104	96.6886		95.2358	95.9846		101.045	95.5254
94.4952	95.5982	94.8716	95.7765	90.4957	96.6887	90.2121	96.674	95.6118	95.97	94.6383	95.9854	101.415	95.6417	113.035	95.4027		94.2465	95.7009		90.239	96.6867		95.3614	95.9823		101.167	95.5244
94.6204	95.5914	94.9988	95.7692	90.6249	96.6857	90.3426	96.6714	95.7383	95.968	94.763	95.9828	101.538	95.6403	113.155	95.4018		94.3746	95.6942		90.3668	96.6842		95.4895	95.9801		101.294	95.5233
94.7444	95.585	95.1248	95.7618	90.7561	96.6833	90.4706	96.669	95.8625	95.9661	94.8881	95.9805	101.664	95.6387	113.285	95.4009		94.4952	95.6873		90.4957	96.6813		95.6118	95.9777		101.415	95.5222
94.8733	95.5789	95.2487	95.7545	90.8862	96.6803	90.601	96.6669	95.9909	95.9637	95.0176	95.9781	101.788	95.6375	113.414	95.4002		94.6204	95.6803		90.6249	96.6786		95.7383	95.9754		101.538	95.521
94.9988	95.5727	95.3711	95.7472	91.014	96.6777	90.7334	96.6645	96.1168	95.9614	95.1461	95.9755	101.915	95.6362	113.54	95.3991		94.7444	95.6734		90.7561	96.6762		95.8625	95.9733		101.664	95.5198
95.1225	95.5666	95.498	95.7403	91.1446	96.6748	90.8671	96.6621	96.2408	95.9595	95.2722	95.9729	102.037	95.6348	113.67	95.3986		94.8733	95.6667		90.8862	96.6736		95.9909	95.9709		101.788	95.5188
95.2455	95.5602	95.6238	95.7333	91.2772	96.672	90.9979	96.6593	96.3667	95.9581	95.3987	95.9702	102.164	95.6337	113.796	95.3977		94.9988	95.66		91.014	96.6711		96.1168	95.9684		101.915	95.5176
95.3726	95.5539	95.749	95.7263	91.4028	96.6696	91.1257	96.6566	96.493	95.9564	95.5266	95.9677	102.286	95.6325	113.926	95.3971		95.1225	95.6534		91.1446	96.6684		96.2408	95.9662		102.037	95.5167
95.4963	95.548	95.877	95.7193	91.5353	96.668	91.253	96.654	96.6184	95.9547	95.6525	95.9654	102.408	95.6319	114.055	95.3967		95.2455	95.6468		91.2772	96.6657		96.3667	95.9641		102.164	95.5157
95.6221	95.5422	95.9993	95.7122	91.6654	96.6665	91.3854	96.6516	96.7457	95.953	95.779	95.9628	102.535	95.6313	114.18	95.3961		95.3726	95.6401		91.4028	96.6631		96.493	95.9621		102.286	95.5148
95.7469	95.5362	96.1257	95.7052	91.79	96.6655	91.5163	96.6492	96.8698	95.9513	95.9008	95.9603	102.66	95.6307	114.308	95.3956		95.4963	95.6336		91.5353	96.661		96.6184	95.96		102.408	95.5143
95.871	95.5304	96.2484	95.6983	91.9279	96.6646	91.6432	96.6468	96.9962	95.9497	96.0268	95.9579	102.784	95.63	114.437	95.395		95.6221	95.6272		91.6654	96.6591		96.7457	95.9579		102.535	95.5137
95.9991	95.5246	96.3749	95.6912	92.0596	96.6633	91.7725	96.6442	97.1209	95.948	96.1599	95.9554	102.908	95.6293	114.567	95.3943		95.7469	95.6207		91.79	96.6573		96.8698	95.9558		102.66	95.5131
96.1246	95.519	96.5019	95.6842	92.1837	96.6621	91.9033	96.6415	97.2466	95.9465	96.2836	95.9529	103.034	95.6288	114.688	95.3933		95.871	95.6143		91.9279	96.6557		96.9962	95.9538		102.784	95.5125
96.2456	95.5132	96.6265	95.6771	92.3209	96.6605	92.0307	96.6392	97.374	95.9449	96.4133	95.9506	103.158	95.6281	114.823	95.3927		95.9991	95.6079		92.0596	96.6538		97.1209	95.9517		102.908	95.5118
96.37	95.5075	96.7506	95.6701	92.4462	96.6593	92.1639	96.6368	97.4985	95.9433	96.5397	95.9481	103.286	95.6268	114.945	95.3918		96.1246	95.6016		92.1837	96.6518		97.2466	95.9497		103.034	95.5111
96.4991	95.5022	96.88	95.6629	92.5814	96.6578	92.296	96.6348	97.6252	95.9417	96.665	95.946	103.409	95.6256	115.076	95.391		96.2456	95.5952		92.3209	96.6499		97.374	95.9477		103.158	95.5104
96.6202	95.4967	97.0051	95.6561	92.7069	96.6561	92.4279	96.6327	97.7493	95.9401	96.7928	95.9437	103.534	95.6245	115.204	95.3905		96.37	95.5888		92.4462	96.6481		97.4985	95.9457		103.286	95.5093
96.7492	95.4912	97.1312	95.6493	92.8405	96.6533	92.5609	96.6307	97.8788	95.9385	96.9232	95.9414	103.662	95.6234	115.327	95.3896		96.4991	95.5825		92.5814	96.6463		97.6252	95.9438		103.409	95.5083
96.8708	95.4854	97.2564	95.6424	92.9697	96.6509	92.6881	96.6284	98.0027	95.9368	97.0466	95.9393	103.787	95.6224	115.455	95.3883		96.6202	95.5764		92.7069	96.6444		97.7493	95.9419		103.534	95.5075
96.9986	95.4803	97.3846	95.6354	93.0978	96.6484	92.8204	96.6262	98.1273	95.9353	97.1746	95.9372	103.908	95.6215	115.579	95.3874		96.7492	95.5702		92.8405	96.642		97.8788	95.94		103.662	95.5065
97.1288	95.475	97.5131	95.6287	93.2306	96.6459	92.9556	96.6239	98.2578	95.9336	97.3007	95.935	104.033	95.6207	115.709	95.3866		96.8708	95.5639		92.9697	96.6396		98.0027	95.938		103.787	95.5054
97.2471	95.4698	97.6362	95.6219	93.3642	96.6436	93.0855	96.6218	98.3813	95.9319	97.427	95.9327	104.157	95.62	115.837	95.3861		96.9986	95.5579		93.0978	96.6373		98.1273	95.9362		103.908	95.5045
97.3763	95.4644	97.7643	95.6151	93.4891	96.6417	93.2124	96.6199	98.5036	95.9303	97.5552	95.9308	104.282	95.6188	115.96	95.3854		97.1288	95.5519		93.2306	96.6349		98.2578	95.9343		104.033	95.5037
97.5032	95.459	97.8914	95.6086	93.6204	96.6403	93.3429	96.6176	98.6345	95.9289	97.6827	95.9287	104.408	95.6178	116.091	95.3846		97.2471	95.5459		93.3642	96.6327		98.3813	95.9323		104.157	95.503
97.6224	95.4535	98.0174	95.6017	93.7498	96.6387	93.477	96.6152	98.7583	95.9273	97.8094	95.9268	104.534	95.6173	116.215	95.3841		97.3763	95.5397		93.4891	96.6308		98.5036	95.9305		104.282	95.5021
97.7527	95.4481	98.1458	95.5951	93.8848	96.6372	93.6067	96.613	98.8879	95.9253	97.9299	95.9247	104.661	95.6166	116.348	95.3837		97.5032	95.5338		93.6204	96.6289		98.6345	95.9288		104.408	95.5012
97.8765	95.4427	98.2685	95.5882	94.0107	96.6355	93.7357	96.6107	99.0087	95.9236	98.0654	95.9228	104.784	95.6162	116.47	95.3829		97.6224	95.5276		93.7498	96.6269		98.7583	95.927		104.534	95.5007
98.0018	95.4372	98.3941	95.5814	94.1399	96.6347	93.8717	96.6081	99.1326	95.9218	98.1851	95.9208	104.906	95.6153	116.599	95.3821		97.7527	95.5216		93.8848	96.6251		98.8879	95.925		104.661	95.5001
98.1235	95.4322	98.5185	95.5747	94.2697	96.6333	93.9998	96.6056	99.261	95.92	98.3145	95.9187	105.031	95.6139	116.723	95.382		97.8765	95.5154		94.0107	96.6231		99.0087	95.9232		104.784	95.4996
98.2504	95.4265	98.648	95.5681	94.4056	96.6318	94.1316	96.603	99.3891	95.9185	98.443	95.9166	105.162	95.6129	116.856	95.3814		98.0018	95.5093		94.1399	96.6214		99.1326	95.9213		104.906	95.4986
98.3801	95.4208	98.7739	95.5614	94.5322	96.6309	94.2618	96.6011	99.5095	95.9171	98.5706	95.9149	105.288	95.6118	116.981	95.3807		98.1235	95.5034		94.2697	96.6194		99.261	95.9194		105.031	95.4979
98.5082	95.4151	98.9024	95.5547	94.6628	96.63	94.402	96.599	99.6382	95.9159	98.6961	95.9131	105.409	95.6109	117.108	95.38		98.2504	95.4973		94.4056	96.6174		99.3891	95.9175		105.162	95.4972
98.638	95.4094	99.0254	95.5482	94.7924	96.6287	94.5311	96.5969	99.7664	95.9148	98.8223	95.911	105.533	95.6101	117.232	95.3794		98.3801	95.4911		94.5322	96.616		99.5095	95.916		105.288	95.4962
98.7614	95.4038	99.1559	95.5416	94.9256	96.6271	94.6574	96.5947	99.892	95.9136	98.9518	95.9091	105.659	95.609	117.361	95.3791		98.5082	95.4849		94.6628	96.6145		99.6382	95.9145		105.409	95.4954
98.8806	95.3986	99.2807	95.5353	95.0554	96.6258	94.7952	96.593	100.017	95.9122	99.0822	95.9072	105.787	95.6078	117.485	95.3785		98.638	95.4788		94.7924	96.6128		99.7664	95.9129		105.533	95.4948
99.0131	95.3931	99.4077	95.5289	95.1891	96.6245	94.9226	96.5908	100.147	95.911	99.207	95.9052	105.91	95.6067	117.612	95.3779		98.7614	95.4727		94.9256	96.6109		99.892	95.9113		105.659	95.4941
99.1392	95.3874	99.5316	95.5224	95.3206	96.6237	95.051	96.589	100.271	95.9099	99.3323	95.9031	106.035	95.6053	117.736	95.3775		98.8806	95.467		95.0554	96.6094		100.017	95.9097		105.787	95.4932
99.2673	95.3819	99.6618	95.5159	95.4501	96.6227	95.1851	96.5874	100.4	95.9088	99.463	95.9011	106.16	95.6041	117.865	95.3773		99.0131	95.461		95.1891	96.6076		100.147	95.9081		105.91	95.4923
99.391	95.3759	99.7903	95.5095	95.5812	96.6212	95.3124	96.5856	100.525	95.908	99.5882	95.8992	106.282	95.6033	117.992	95.3768		99.1392	95.4549		95.3206	96.6064		100.271	95.9065		106.035	95.4914
99.5195	95.3706	99.9128	95.5031	95.7102	96.6202	95.4478	96.5836	100.654	95.9069	99.716	95.8973	106.408	95.6025	118.118	95.3766		99.2673	95.4489		95.4501	96.605		100.4	95.9049		106.16	95.4907
99.6445	95.3655	100.041	95.4967	95.8426	96.6182	95.5765	96.5816	100.775	95.9056	99.8474	95.895	106.533	95.6017	118.245	95.3759		99.391	95.4427		95.5812	96.6034		100.525	95.9036		106.282	95.4901
99.7712	95.3602	100.167	95.4903	95.9775	96.6162	95.7102	96.58	100.907	95.9041	99.9749	95.8928	106.662	95.6009	118.369	95.375		99.5195	95.4368		95.7102	96.6019		100.654	95.9021		106.408	95.4895
99.8934	95.3551	100.293	95.4838	96.1073	96.6141	95.845	96.578	101.032	95.9025	100.101	95.8909	106.79	95.6002	118.489	95.3743		99.6445	95.4311		95.8426	96.5999		100.775	95.9003		106.533	95.4888
100.019	95.35	100.423	95.4776	96.2386	96.6122	95.9781	96.5761	101.158	95.901	100.224	95.889	106.912	95.5997	118.618	95.3734		99.7712	95.4252		95.9775	96.5981		100.907	95.8985		106.662	95.4879
100.147	95.3448	100.547	95.4713	96.3678	96.6102	96.1056	96.5741	101.282	95.8997	100.353	95.8871	107.037	95.5991	118.747	95.3729		99.8934	95.4195		96.1073	96.596		101.032	95.8967		106.79	95.4872
100.275	95.3397	100.678	95.465	96.4998	96.6084	96.2385	96.5723	101.41	95.8986	100.479	95.8854	107.165	95.5985	118.871	95.3723		100.019	95.4138		96.2386	96.5942		101.158	95.895		106.912	95.4866
100.4	95.3351	100.806	95.4589	96.6304	96.6067	96.3695	96.5702	101.535	95.8973	100.605	95.8837	107.29	95.5981	119	95.3712		100.147	95.4081		96.3678	96.5922		101.282	95.8934		107.037	95.486
100.522	95.3301	100.931	95.4527	96.7622	96.6054	96.5039	96.5683	101.663	95.8962	100.736	95.882	107.414	95.5981	119.127	95.3701		100.275	95.4024		96.4998	96.5903		101.41	95.892		107.165	95.4854
100.653	95.3252	101.06	95.4464	96.889	96.6048	96.6317	96.5664	101.789	95.8949	100.86	95.8802	107.543	95.5979	119.253	95.3692		100.4	95.397		96.6304	96.5885		101.535	95.8905		107.29	95.4846
100.777	95.3202	101.187	95.4401	97.0205	96.6038	96.762	96.5648	101.917	95.8938	100.988	95.8786	107.669	95.5975	119.379	95.3684		100.522	95.3914		96.7622	96.5869		101.663	95.8891		107.414	95.4841
100.904	95.3153	101.309	95.4339	97.1539	96.6033	96.8906	96.5628	102.041	95.8926	101.118	95.8772	107.794	95.597	119.504	95.3681		100.653	95.3858		96.889	96.5856		101.789	95.8876		107.543	95.4836
101.031	95.3106	101.437	95.4276	97.2871	96.6025	97.0267	96.5605	102.17	95.8917	101.248	95.8758	107.918	95.5966	119.629	95.368		100.777	95.3802		97.0205	96.5843		101.917	95.8862		107.669	95.4829
101.159	95.3056	101.566	95.4215	97.4173	96.6022	97.1557	96.5585	102.298	95.8906	101.373	95.8746	108.042	95.5961	119.754	95.3676		100.904	95.3746		97.1539	96.5831		102.041	95.8849		107.794	95.4826
101.285	95.3005	101.693	95.4154	97.5533	96.6016	97.2879	96.5566	102.422	95.8897	101.503	95.8734	108.165	95.5956	119.883	95.3671		101.031	95.3691		97.2871	96.5815		102.17	95.8837		107.918	95.4823
101.415	95.2956	101.819	95.409	97.6782	96.6011	97.419	96.5547	102.549	95.8886	101.632	95.8719	108.3	95.5951	120.008	95.3666		101.159	95.3636		97.4173	96.5803		102.298	95.8826		108.042	95.4818
101.537	95.2905	101.946	95.4028	97.8112	96.6004	97.5526	96.5527	102.675	95.8875	101.756	95.8707	108.424	95.595	120.138	95.3662		101.285	95.358		97.5533	96.5791		102.422	95.8815		108.165	95.4813
101.666	95.2854	102.075	95.3966	97.9402	96.5995	97.6846	96.5507	102.803	95.8864	101.886	95.8695	108.554	95.5948	120.26	95.3661		101.415	95.3523		97.6782	96.5779		102.549	95.8803		108.3	95.4808
101.792	95.2803	102.203	95.3903	98.0748	96.598	97.8173	96.5485	102.93	95.8852	102.01	95.8684	108.676	95.5941	120.386	95.3661		101.537	95.3466		97.8112	96.5765		102.675	95.8791		108.424	95.4806
101.919	95.2754	102.328	95.3842	98.2058	96.5961	97.9425	96.5466	103.057	95.8843	102.143	95.8673	108.801	95.5934	120.513	95.3658		101.666	95.341		97.9402	96.5751		102.803	95.878		108.554	95.4805
102.048	95.2703	102.454	95.3781	98.338	96.5942	98.076	96.5447	103.181	95.8832	102.268	95.8662	108.93	95.5929	120.635	95.3657		101.792	95.3353		98.0748	96.5732		102.93	95.8768		108.676	95.4801
102.171	95.2653	102.581	95.3722	98.466	96.5923	98.2115	96.5432	103.309	95.8823	102.4	95.8651	109.052	95.5923	120.763	95.3654		101.919	95.3298		98.2058	96.5713		103.057	95.8758		108.801	95.4796
102.302	95.2603	102.712	95.3662	98.5963	96.5907	98.3417	96.5416	103.436	95.8812	102.524	95.8638	109.181	95.5917	120.89	95.3651		102.048	95.3242		98.338	96.5694		103.181	95.8747		108.93	95.4793
102.425	95.2555	102.833	95.3603	98.7254	96.5887	98.4752	96.54	103.562	95.8802	102.653	95.8623	109.306	95.591	121.016	95.365		102.171	95.3188		98.466	96.5678		103.309	95.8737		109.052	95.4789
102.552	95.2507	102.965	95.3542	98.8599	96.5868	98.6041	96.5387	103.692	95.8792	102.78	95.8608	109.431	95.5904	121.141	95.3647		102.302	95.3132		98.5963	96.5662		103.436	95.8725		109.181	95.4784
102.68	95.2455	103.092	95.3483	98.9929	96.5852	98.7326	96.5374	103.815	95.8785	102.909	95.8594	109.558	95.5899	121.265	95.3643		102.425	95.3079		98.7254	96.5643		103.562	95.8713		109.306	95.478
102.807	95.2406	103.217	95.3424	99.1262	96.5839	98.8691	96.5359	103.941	95.8776	103.033	95.8577	109.68	95.5892	121.393	95.3637		102.552	95.3024		98.8599	96.5627		103.692	95.87		109.431	95.4775
102.932	95.2355	103.346	95.3364	99.2512	96.5823	98.9965	96.5348	104.069	95.8769	103.166	95.8562	109.81	95.5887	121.518	95.3628		102.68	95.2969		98.9929	96.5613		103.815	95.869		109.558	95.4771
103.058	95.2306	103.475	95.3308	99.3826	96.5809	99.1273	96.5335	104.194	95.8761	103.293	95.8545	109.936	95.5881	121.642	95.362		102.807	95.2915		99.1262	96.5599		103.941	95.8677		109.68	95.4764
103.186	95.2256	103.604	95.3252	99.5163	96.5799	99.2647	96.5323	104.32	95.8751	103.416	95.8529	110.065	95.5877	121.765	95.3611		102.932	95.2859		99.2512	96.5585		104.069	95.8666		109.81	95.4757
103.313	95.2211	103.735	95.3193	99.6492	96.5791	99.3925	96.5311	104.447	95.8743	103.549	95.8514	110.189	95.5869	121.891	95.3598		103.058	95.2807		99.3826	96.5572		104.194	95.8653		109.936	95.4751
103.438	95.2162	103.858	95.3133	99.7764	96.5785	99.5241	96.5295	104.574	95.8737	103.68	95.8499	110.316	95.5861	122.017	95.3585		103.186	95.2754		99.5163	96.5561		104.32	95.864		110.065	95.4744
103.568	95.2115	103.986	95.3077	99.9071	96.5781	99.6547	96.5282	104.704	95.8731	103.802	95.8487	110.437	95.5856	122.142	95.3572		103.313	95.2702		99.6492	96.5551		104.447	95.8629		110.189	95.4733
103.691	95.2065	104.113	95.3018	100.04	96.5781	99.7888	96.5272	104.828	95.8722	103.934	95.8475	110.566	95.5853	122.273	95.3558		103.438	95.2648		99.7764	96.554		104.574	95.8618		110.316	95.4723
103.823	95.2019	104.243	95.2961	100.171	96.5779	99.9211	96.5257	104.954	95.8712	104.059	95.8464	110.695	95.5848	122.397	95.3546		103.568	95.2596		99.9071	96.5532		104.704	95.8609		110.437	95.4714
103.949	95.1976	104.371	95.2905	100.299	96.5773	100.054	96.5241	105.082	95.8699	104.188	95.8452	110.825	95.5846	122.521	95.3532		103.691	95.2542		100.04	96.5526		104.828	95.8599		110.566	95.4706
104.075	95.1929	104.5	95.285	100.431	96.5765	100.185	96.523	105.206	95.869	104.317	95.8442	110.951	95.5842	122.646	95.352		103.823	95.249		100.171	96.5518		104.954	95.8588		110.695	95.4697
104.201	95.1882	104.628	95.2797	100.561	96.576	100.313	96.5216	105.338	95.8679	104.445	95.843	111.076	95.5836	122.772	95.3514		103.949	95.244		100.299	96.5507		105.082	95.8576		110.825	95.4689
104.325	95.1835	104.755	95.2741	100.693	96.5758	100.448	96.52	105.464	95.8672	104.574	95.842	111.202	95.583	122.895	95.3504		104.075	95.239		100.431	96.5498		105.206	95.8566		110.951	95.4681
104.452	95.1792	104.883	95.2682	100.823	96.5753	100.579	96.5186	105.591	95.8665	104.701	95.8408	111.328	95.5824	123.022	95.3497		104.201	95.234		100.561	96.5488		105.338	95.8554		111.076	95.4675
104.58	95.1746	105.01	95.2627	100.958	96.575	100.707	96.5169	105.721	95.8659	104.828	95.8397	111.457	95.5823	123.146	95.3492		104.325	95.2288		100.693	96.5479		105.464	95.8546		111.202	95.4667
104.712	95.1702	105.136	95.2573	101.086	96.5742	100.837	96.5159	105.842	95.8651	104.956	95.8387	111.582	95.582	123.269	95.3489		104.452	95.2237		100.823	96.5469		105.591	95.8536		111.328	95.4661
104.839	95.1656	105.267	95.2517	101.217	96.573	100.971	96.5144	105.971	95.8643	105.079	95.8376	111.705	95.5819	123.394	95.3484		104.58	95.2187		100.958	96.546		105.721	95.8528		111.457	95.4657
104.964	95.1613	105.392	95.2463	101.347	96.5717	101.094	96.5125	106.094	95.8638	105.209	95.8363	111.834	95.5815	123.52	95.3481		104.712	95.2138		101.086	96.545		105.842	95.8519		111.582	95.4655
105.087	95.1571	105.517	95.2408	101.478	96.5708	101.229	96.5108	106.224	95.8635	105.332	95.8351	111.96	95.5814	123.647	95.3479		104.839	95.2087		101.217	96.5437		105.971	95.8509		111.705	95.4652
105.215	95.1527	105.646	95.2351	101.61	96.5698	101.361	96.5094	106.352	95.8628	105.461	95.834	112.086	95.5813	123.77	95.3476		104.964	95.2038		101.347	96.5421		106.094	95.85		111.834	95.4648
105.343	95.1484	105.776	95.2294	101.741	96.5685	101.495	96.5077	106.476	95.8621	105.592	95.8328	112.213	95.5813	123.894	95.3473		105.087	95.1989		101.478	96.5408		106.224	95.8493		111.96	95.4647
105.467	95.1441	105.903	95.2237	101.869	96.5672	101.626	96.5062	106.606	95.8617	105.717	95.8318	112.34	95.5811	124.021	95.347		105.215	95.1939		101.61	96.5396		106.352	95.8484		112.086	95.4644
105.593	95.1399	106.031	95.2183	102.001	96.5662	101.759	96.5049	106.732	95.8607	105.852	95.8305	112.466	95.5813	124.147	95.3467		105.343	95.1889		101.741	96.5381		106.476	95.8475		112.213	95.4643
105.721	95.1352	106.159	95.2131	102.132	96.5653	101.89	96.5033	106.858	95.8597	105.979	95.8296	112.596	95.5814	124.272	95.3465		105.467	95.1839		101.869	96.5367		106.606	95.8467		112.34	95.464
105.85	95.1305	106.284	95.2078	102.264	96.5638	102.021	96.5019	106.986	95.8587	106.104	95.8284	112.724	95.581	124.397	95.3463		105.593	95.1791		102.001	96.5355		106.732	95.8456		112.466	95.464
105.973	95.1259	106.412	95.2022	102.392	96.5622	102.15	96.5003	107.115	95.8575	106.23	95.8271	112.847	95.5805	124.524	95.3461		105.721	95.1741		102.132	96.5343		106.858	95.8447		112.596	95.4639
106.103	95.1217	106.541	95.1968	102.524	96.561	102.283	96.499	107.239	95.8566	106.36	95.8259	112.972	95.5802	124.647	95.3466		105.85	95.1692		102.264	96.5328		106.986	95.8435		112.724	95.4636
106.229	95.1172	106.668	95.1914	102.653	96.5596	102.412	96.4978	107.368	95.8559	106.487	95.8248	113.097	95.5798	124.768	95.3472		105.973	95.1641		102.392	96.5312		107.115	95.8423		112.847	95.4633
106.352	95.1126	106.798	95.1861	102.787	96.5577	102.544	96.4969	107.49	95.8552	106.613	95.8237	113.225	95.5794	124.9	95.3473		106.103	95.1592		102.524	96.53		107.239	95.8413		112.972	95.4634
106.482	95.1079	106.924	95.1808	102.918	96.5559	102.674	96.4956	107.62	95.8548	106.744	95.8227	113.356	95.5788	125.023	95.3477		106.229	95.1543		102.653	96.5287		107.368	95.8404		113.097	95.4635
106.607	95.1039	107.054	95.1755	103.047	96.555	102.805	96.4945	107.748	95.8542	106.871	95.8217	113.482	95.5779	125.149	95.348		106.352	95.1494		102.787	96.5273		107.49	95.8394		113.225	95.4634
106.73	95.0998	107.181	95.1701	103.176	96.5535	102.934	96.4933	107.869	95.8537	106.998	95.8207	113.612	95.5776	125.272	95.3485		106.482	95.1444		102.918	96.5258		107.62	95.8388		113.356	95.4632
106.865	95.0957	107.307	95.1648	103.311	96.5518	103.07	96.4921	107.998	95.8532	107.12	95.8199	113.735	95.5771	125.392	95.349		106.607	95.1397		103.047	96.5247		107.748	95.838		113.482	95.463
106.988	95.0917	107.435	95.1595	103.439	96.5501	103.204	96.4909	108.124	95.8528	107.25	95.8187	113.862	95.5764	125.522	95.3491		106.73	95.1349		103.176	96.5234		107.869	95.8372		113.612	95.463
107.119	95.088	107.566	95.1542	103.571	96.5489	103.332	96.4898	108.254	95.8522	107.383	95.818	113.989	95.5757	125.643	95.349		106.865	95.1302		103.311	96.522		107.998	95.8365		113.735	95.4631
107.243	95.0843	107.697	95.1492	103.702	96.5484	103.462	96.4886	108.378	95.852	107.508	95.8172	114.112	95.5755	125.773	95.3486		106.988	95.1256		103.439	96.5205		108.124	95.8358		113.862	95.4628
107.371	95.0803	107.821	95.1441	103.834	96.5478	103.592	96.4875	108.502	95.8515	107.636	95.8162	114.238	95.5752	125.894	95.3481		107.119	95.1211		103.571	96.5194		108.254	95.8351		113.989	95.4624
107.497	95.0767	107.95	95.1389	103.962	96.5473	103.722	96.4861	108.633	95.8507	107.767	95.8155	114.367	95.5748	126.02	95.3471		107.243	95.1167		103.702	96.5185		108.378	95.8346		114.112	95.462
107.625	95.0731	108.078	95.1338	104.095	96.5469	103.854	96.4845	108.759	95.8503	107.895	95.8147	114.49	95.5744	126.148	95.3464		107.371	95.1122		103.834	96.5176		108.502	95.8339		114.238	95.4617
107.752	95.0697	108.207	95.1286	104.221	96.5472	103.984	96.4833	108.887	95.8498	108.027	95.8139	114.615	95.5741	126.271	95.346		107.497	95.1078		103.962	96.5167		108.633	95.8331		114.367	95.4609
107.877	95.0661	108.333	95.1238	104.352	96.5469	104.117	96.4819	109.012	95.8494	108.148	95.8132	114.741	95.5738	126.391	95.3455		107.625	95.1034		104.095	96.5157		108.759	95.8325		114.49	95.4604
108.008	95.0624	108.461	95.119	104.479	96.547	104.245	96.4806	109.141	95.8488	108.277	95.8124	114.871	95.5734	126.518	95.3444		107.752	95.0991		104.221	96.5152		108.887	95.8318		114.615	95.46
108.132	95.0585	108.59	95.1142	104.611	96.547	104.376	96.4792	109.266	95.8484	108.403	95.8115	114.996	95.5725	126.644	95.3432		107.877	95.0949		104.352	96.5144		109.012	95.8313		114.741	95.4597
108.254	95.0549	108.717	95.1093	104.737	96.5467	104.505	96.4781	109.398	95.8478	108.53	95.8106	115.122	95.5724	126.767	95.3423		108.008	95.0907		104.479	96.5138		109.141	95.8306		114.871	95.4589
108.382	95.0513	108.843	95.1044	104.871	96.5468	104.639	96.477	109.523	95.8473	108.658	95.8097	115.249	95.5724	126.891	95.3417		108.132	95.0864		104.611	96.5131		109.266	95.83		114.996	95.4579
108.515	95.0475	108.974	95.0994	105.004	96.5463	104.772	96.4758	109.647	95.8468	108.788	95.8089	115.371	95.5722	127.016	95.3414		108.254	95.0821		104.737	96.5124		109.398	95.8292		115.122	95.4573
108.637	95.0437	109.096	95.0944	105.131	96.5458	104.897	96.4747	109.773	95.8459	108.918	95.8082	115.498	95.5717	127.141	95.3405		108.382	95.0779		104.871	96.5119		109.523	95.8285		115.249	95.457
108.766	95.0398	109.227	95.0897	105.26	96.546	105.028	96.4738	109.901	95.8453	109.038	95.8073	115.626	95.5713	127.269	95.3399		108.515	95.0734		105.004	96.511		109.647	95.8278		115.371	95.4568
108.892	95.0359	109.352	95.0849	105.39	96.547	105.159	96.4731	110.028	95.8447	109.17	95.8067	115.754	95.5711	127.39	95.3391		108.637	95.069		105.131	96.5102		109.773	95.827		115.498	95.4561
109.018	95.0321	109.479	95.0804	105.522	96.5474	105.291	96.472	110.156	95.8439	109.297	95.8059	115.879	95.5709	127.516	95.3379		108.766	95.0648		105.26	96.5099		109.901	95.8263		115.626	95.4556
109.146	95.0279	109.61	95.0755	105.654	96.5475	105.418	96.4707	110.284	95.8429	109.424	95.8052	116.005	95.5707	127.64	95.3371		108.892	95.0604		105.39	96.5101		110.028	95.8257		115.754	95.4551
109.27	95.0237	109.738	95.0706	105.778	96.5477	105.554	96.4695	110.409	95.8421	109.554	95.8046	116.135	95.5707	127.765	95.3364		109.018	95.0562		105.522	96.5097		110.156	95.8249		115.879	95.4544
109.4	95.0203	109.866	95.0656	105.915	96.5476	105.684	96.4684	110.537	95.8413	109.684	95.8041	116.262	95.5716	127.891	95.3359		109.146	95.0517		105.654	96.5091		110.284	95.8241		116.005	95.4539
109.528	95.0165	109.995	95.0609	106.043	96.5477	105.811	96.4674	110.664	95.8408	109.806	95.8038	116.388	95.5717	128.013	95.3353		109.27	95.0472		105.778	96.5086		110.409	95.8233		116.135	95.4536
109.652	95.0124	110.122	95.0563	106.171	96.5473	105.942	96.4664	110.789	95.8403	109.936	95.8034	116.513	95.5714	128.137	95.3346		109.4	95.043		105.915	96.508		110.537	95.8227		116.262	95.4537
109.782	95.0088	110.247	95.0517	106.302	96.5469	106.072	96.4653	110.915	95.84	110.066	95.8027	116.639	95.5709	128.262	95.334		109.528	95.0387		106.043	96.5075		110.664	95.8223		116.388	95.4535
109.905	95.005	110.375	95.0472	106.43	96.5464	106.201	96.4641	111.041	95.8399	110.193	95.8021	116.768	95.5705	128.389	95.3336		109.652	95.0343		106.171	96.5069		110.789	95.8218		116.513	95.453
110.03	95.001	110.502	95.0426	106.56	96.5451	106.336	96.4631	111.17	95.8399	110.317	95.8015	116.891	95.5701	128.511	95.3334		109.782	95.0303		106.302	96.5061		110.915	95.8214		116.639	95.4524
110.158	94.9974	110.632	95.038	106.692	96.5429	106.463	96.4618	111.294	95.8397	110.45	95.8005	117.017	95.5698	128.634	95.3333		109.905	95.0261		106.43	96.5052		111.041	95.821		116.768	95.452
110.287	94.9936	110.76	95.0333	106.816	96.5408	106.591	96.4608	111.422	95.8393	110.574	95.7999	117.143	95.5698	128.76	95.3333		110.03	95.0218		106.56	96.5041		111.17	95.8207		116.891	95.4518
110.413	94.9899	110.887	95.0287	106.945	96.5386	106.724	96.4597	111.551	95.8389	110.703	95.7991	117.272	95.5698	128.881	95.3328		110.158	95.0177		106.692	96.5023		111.294	95.8201		117.017	95.4515
110.543	94.9864	111.014	95.0242	107.071	96.5365	106.849	96.4587	111.679	95.8385	110.831	95.7983	117.398	95.5694	129.011	95.3322		110.287	95.0135		106.816	96.5008		111.422	95.8196		117.143	95.4516
110.669	94.9823	111.143	95.0197	107.207	96.5342	106.979	96.458	111.804	95.8383	110.957	95.7977	117.522	95.5686	129.131	95.3317		110.413	95.0093		106.945	96.4992		111.551	95.819		117.272	95.4513
110.794	94.9786	111.268	95.0152	107.332	96.5323	107.109	96.4569	111.928	95.8379	111.083	95.7969	117.649	95.5682	129.258	95.3311		110.543	95.0053		107.071	96.4976		111.679	95.8184		117.398	95.4508
110.92	94.9752	111.397	95.0106	107.466	96.5306	107.243	96.4559	112.055	95.8375	111.212	95.7961	117.775	95.5682	129.383	95.3305		110.669	95.001		107.207	96.4961		111.804	95.818		117.522	95.4502
111.046	94.9718	111.526	95.006	107.592	96.5291	107.372	96.4551	112.181	95.8371	111.338	95.7955	117.902	95.5684	129.511	95.33		110.794	94.9969		107.332	96.4946		111.928	95.8174		117.649	95.4496
111.175	94.9683	111.654	95.0013	107.723	96.528	107.498	96.4544	112.308	95.8366	111.465	95.7949	118.026	95.5687	129.631	95.3294		110.92	94.9929		107.466	96.4932		112.055	95.8168		117.775	95.4494
111.303	94.9648	111.782	94.9968	107.849	96.5269	107.633	96.4535	112.438	95.8359	111.591	95.7942	118.151	95.5687	129.758	95.3287		111.046	94.9889		107.592	96.4921		112.181	95.8163		117.902	95.4492
111.428	94.9613	111.912	94.9924	107.979	96.5262	107.762	96.4527	112.563	95.8351	111.721	95.7937	118.282	95.5684	129.88	95.3283		111.175	94.9848		107.723	96.4912		112.308	95.8157		118.026	95.449
111.553	94.9579	112.039	94.988	108.107	96.5258	107.887	96.4516	112.694	95.835	111.845	95.7929	118.409	95.5679	130.005	95.3277		111.303	94.9808		107.849	96.4902		112.438	95.8151		118.151	95.4487
111.683	94.9548	112.164	94.9836	108.236	96.5256	108.019	96.4507	112.82	95.8348	111.971	95.7924	118.531	95.5674	130.126	95.327		111.428	94.9769		107.979	96.4895		112.563	95.8144		118.282	95.4484
111.807	94.9518	112.293	94.9793	108.368	96.5252	108.149	96.45	112.941	95.8346	112.098	95.7918	118.659	95.567	130.25	95.3265		111.553	94.973		108.107	96.4887		112.694	95.814		118.409	95.4478
111.937	94.9485	112.421	94.975	108.498	96.5252	108.277	96.4493	113.067	95.8342	112.228	95.791	118.786	95.5667	130.374	95.3267		111.683	94.9692		108.236	96.4881		112.82	95.8136		118.531	95.4472
112.06	94.9451	112.546	94.9706	108.626	96.5252	108.407	96.4486	113.197	95.8342	112.355	95.7902	118.912	95.5665	130.498	95.327		111.807	94.9655		108.368	96.4876		112.941	95.8132		118.659	95.4468
112.185	94.9418	112.672	94.9661	108.761	96.5253	108.544	96.4477	113.322	95.8337	112.481	95.7894	119.039	95.5665	130.625	95.3271		111.937	94.9617		108.498	96.4872		113.067	95.8126		118.786	95.4467
112.312	94.9381	112.799	94.9617	108.886	96.5254	108.668	96.4467	113.445	95.8333	112.611	95.7889	119.168	95.5665	130.75	95.3267		112.06	94.9579		108.626	96.4869		113.197	95.8122		118.912	95.4467
112.438	94.9348	112.931	94.9575	109.02	96.5253	108.796	96.4458	113.574	95.8331	112.738	95.7883	119.294	95.5662	130.875	95.3262		112.185	94.9539		108.761	96.4865		113.322	95.8116		119.039	95.4468
112.566	94.9318	113.057	94.9531	109.143	96.5254	108.925	96.4449	113.702	95.8327	112.865	95.7877	119.418	95.5663	130.999	95.3259		112.312	94.9499		108.886	96.486		113.445	95.8111		119.168	95.4466
112.694	94.9286	113.181	94.9487	109.278	96.525	109.053	96.4442	113.832	95.8323	112.99	95.787	119.545	95.5665	131.123	95.3255		112.438	94.9462		109.02	96.4856		113.574	95.8107		119.294	95.4462
112.819	94.9252	113.314	94.9444	109.405	96.5247	109.182	96.4434	113.956	95.8316	113.119	95.7863	119.668	95.5666	131.247	95.3251		112.566	94.9424		109.143	96.4852		113.702	95.8102		119.418	95.4461
112.942	94.9216	113.44	94.9399	109.531	96.525	109.31	96.4425	114.081	95.8312	113.244	95.7857	119.795	95.5668	131.37	95.325		112.694	94.9387		109.278	96.4846		113.832	95.8097		119.545	95.446
113.072	94.918	113.568	94.9357	109.659	96.5252	109.438	96.4415	114.212	95.8306	113.371	95.785	119.923	95.5671	131.495	95.3244		112.819	94.9348		109.405	96.4841		113.956	95.809		119.668	95.4459
113.198	94.9148	113.694	94.9313	109.789	96.5254	109.57	96.4403	114.335	95.8303	113.502	95.7846	120.048	95.5672	131.618	95.3236		112.942	94.9308		109.531	96.4838		114.081	95.8085		119.795	95.4459
113.322	94.9116	113.826	94.9271	109.916	96.5252	109.702	96.4395	114.459	95.8298	113.623	95.7844	120.174	95.5671	131.745	95.3226		113.072	94.9268		109.659	96.4833		114.212	95.8078		119.923	95.4458
113.449	94.9083	113.948	94.9231	110.044	96.5247	109.827	96.4386	114.588	95.8294	113.754	95.7841	120.298	95.5665	131.869	95.3215		113.198	94.923		109.789	96.4829		114.335	95.8075		120.048	95.4454
113.577	94.9051	114.076	94.919	110.172	96.524	109.96	96.4376	114.716	95.8288	113.883	95.7833	120.425	95.5661	131.991	95.3207		113.322	94.9193		109.916	96.4823		114.459	95.8071		120.174	95.4449
113.707	94.9018	114.208	94.9148	110.304	96.5235	110.09	96.4362	114.838	95.8285	114.013	95.7828	120.552	95.5659	132.117	95.3202		113.449	94.9157		110.044	96.4816		114.588	95.8067		120.298	95.444
113.832	94.8984	114.333	94.9109	110.43	96.5231	110.213	96.4349	114.97	95.828	114.138	95.7823	120.676	95.5654	132.243	95.3195		113.577	94.9121		110.172	96.4808		114.716	95.8061		120.425	95.4434
113.955	94.895	114.46	94.907	110.558	96.5227	110.341	96.4336	115.096	95.8278	114.266	95.7822	120.802	95.5652	132.366	95.3188		113.707	94.9083		110.304	96.4798		114.838	95.8056		120.552	95.443
114.079	94.8917	114.589	94.9031	110.681	96.5216	110.473	96.4326	115.219	95.8277	114.39	95.7821	120.931	95.565	132.494	95.318		113.832	94.9047		110.43	96.479		114.97	95.8052		120.676	95.4425
114.212	94.8885	114.717	94.8993	110.819	96.5203	110.604	96.4318	115.345	95.8275	114.516	95.7818	121.056	95.5646	132.617	95.3172		113.955	94.901		110.558	96.4782		115.096	95.805		120.802	95.442
114.336	94.8852	114.838	94.8955	110.945	96.519	110.73	96.431	115.472	95.8272	114.641	95.7817	121.183	95.5644	132.736	95.3172		114.079	94.8974		110.681	96.4771		115.219	95.8049		120.931	95.4415
114.463	94.8821	114.969	94.8918	111.075	96.5178	110.858	96.43	115.597	95.8268	114.768	95.7813	121.307	95.564	132.864	95.3168		114.212	94.8939		110.819	96.476		115.345	95.8046		121.056	95.4409
114.591	94.8789	115.098	94.8881	111.201	96.517	110.987	96.4288	115.724	95.8264	114.895	95.7809	121.434	95.5638	132.988	95.3165		114.336	94.8903		110.945	96.475		115.472	95.8044		121.183	95.4408
114.723	94.8757	115.225	94.8844	111.328	96.516	111.117	96.4278	115.852	95.8259	115.022	95.7804	121.558	95.5641	133.112	95.3163		114.463	94.887		111.075	96.4739		115.597	95.804		121.307	95.4404
114.841	94.8726	115.351	94.8806	111.456	96.5155	111.242	96.4271	115.975	95.8259	115.147	95.7801	121.684	95.5645	133.237	95.3162		114.591	94.8835		111.201	96.4729		115.724	95.8036		121.434	95.4402
114.971	94.8697	115.478	94.8768	111.583	96.5147	111.376	96.4266	116.101	95.8256	115.272	95.7797	121.817	95.5649	133.362	95.316		114.723	94.88		111.328	96.4719		115.852	95.8032		121.558	95.4402
115.094	94.8667	115.609	94.8732	111.71	96.5138	111.503	96.4261	116.23	95.8252	115.401	95.7794	121.941	95.5651	133.485	95.3158		114.841	94.8766		111.456	96.4713		115.975	95.803		121.684	95.4403
115.223	94.8639	115.736	94.8694	111.843	96.5128	111.632	96.4255	116.358	95.8251	115.53	95.7791	122.062	95.5648	133.605	95.3154		114.971	94.8733		111.583	96.4707		116.101	95.8026		121.817	95.4404
115.349	94.8611	115.859	94.8657	111.968	96.513	111.761	96.4245	116.481	95.8246	115.654	95.7785	122.191	95.5644	133.732	95.3153		115.094	94.87		111.71	96.47		116.23	95.8023		121.941	95.4404
115.474	94.8584	115.989	94.8621	112.095	96.5132	111.889	96.4239	116.608	95.8245	115.781	95.7781	122.32	95.5642	133.858	95.3153		115.223	94.8667		111.843	96.4692		116.358	95.8021		122.062	95.4401
115.598	94.8558	116.116	94.8583	112.226	96.5133	112.014	96.4232	116.733	95.8243	115.905	95.7777	122.444	95.5643	133.983	95.3145		115.349	94.8634		111.968	96.4688		116.481	95.8016		122.191	95.4399
115.724	94.8531	116.243	94.8545	112.349	96.5134	112.142	96.4226	116.856	95.8239	116.035	95.7772	122.568	95.5643	134.107	95.3139		115.474	94.8603		112.095	96.4686		116.608	95.8013		122.32	95.4398
115.847	94.8504	116.37	94.8507	112.48	96.5129	112.273	96.4224	116.986	95.8235	116.16	95.7767	122.695	95.5642	134.229	95.3134		115.598	94.857		112.226	96.4682		116.733	95.801		122.444	95.4394
115.978	94.8476	116.498	94.8472	112.609	96.5127	112.399	96.4216	117.111	95.8232	116.29	95.7763	122.821	95.564	134.357	95.3132		115.724	94.8538		112.349	96.468		116.856	95.8005		122.568	95.4391
116.102	94.8448	116.623	94.8437	112.734	96.5124	112.532	96.4207	117.236	95.8225	116.414	95.7757	122.95	95.5634	134.478	95.3124		115.847	94.8506		112.48	96.4676		116.986	95.8001		122.695	95.4388
116.23	94.8418	116.751	94.8401	112.863	96.5119	112.66	96.4201	117.361	95.8222	116.54	95.7753	123.071	95.5628	134.604	95.3119		115.978	94.8474		112.609	96.4672		117.111	95.7997		122.821	95.4386
116.352	94.8387	116.88	94.8364	112.991	96.5117	112.786	96.4194	117.487	95.822	116.665	95.7749	123.193	95.5625	134.73	95.3115		116.102	94.8443		112.734	96.4666		117.236	95.7991		122.95	95.4379
116.484	94.8359	117.008	94.8328	113.122	96.5114	112.915	96.4188	117.613	95.8216	116.796	95.7743	123.323	95.5626	134.852	95.311		116.23	94.8409		112.863	96.466		117.361	95.7987		123.071	95.4374
116.608	94.8331	117.138	94.8291	113.246	96.5105	113.038	96.4184	117.736	95.8215	116.922	95.7739	123.445	95.5627	134.982	95.3105		116.352	94.8376		112.991	96.4656		117.487	95.7985		123.193	95.437
116.736	94.8302	117.257	94.8255	113.376	96.5096	113.166	96.4177	117.867	95.8213	117.048	95.7734	123.573	95.5628	135.105	95.31		116.484	94.8344		113.122	96.4651		117.613	95.7979		123.323	95.4368
116.86	94.8275	117.389	94.822	113.499	96.5088	113.293	96.4171	117.989	95.8214	117.174	95.7729	123.698	95.5628	135.227	95.3101		116.608	94.8311		113.246	96.4645		117.736	95.7977		123.445	95.4366
116.988	94.8245	117.519	94.8184	113.634	96.5077	113.422	96.4164	118.115	95.8213	117.301	95.7725	123.828	95.5631	135.355	95.31		116.736	94.8279		113.376	96.4637		117.867	95.7974		123.573	95.4364
117.115	94.8216	117.641	94.8149	113.759	96.5072	113.55	96.4156	118.241	95.8214	117.427	95.772	123.951	95.5633	135.477	95.3095		116.86	94.8247		113.499	96.4629		117.989	95.7972		123.698	95.4364
117.242	94.8189	117.77	94.8112	113.889	96.5067	113.682	96.4151	118.37	95.8217	117.555	95.7717	124.077	95.5633	135.605	95.3088		116.988	94.8215		113.634	96.4621		118.115	95.7969		123.828	95.4365
117.369	94.8159	117.895	94.8074	114.011	96.5065	113.807	96.4147	118.498	95.8219	117.679	95.7714	124.2	95.5638	135.727	95.3082		117.115	94.8183		113.759	96.4614		118.241	95.7967		123.951	95.4364
117.495	94.8134	118.024	94.8039	114.142	96.5065	113.931	96.4138	118.622	95.8217	117.808	95.7711	124.326	95.5638	135.853	95.308		117.242	94.815		113.889	96.4609		118.37	95.7967		124.077	95.436
117.618	94.811	118.153	94.8004	114.269	96.506	114.064	96.4128	118.743	95.8215	117.93	95.7708	124.454	95.5639	135.971	95.3077		117.369	94.8117		114.011	96.4606		118.498	95.7967		124.2	95.436
117.743	94.8084	118.278	94.7971	114.397	96.5061	114.193	96.412	118.871	95.8214	118.061	95.7707	124.578	95.5638	136.101	95.3075		117.495	94.8086		114.142	96.4601		118.622	95.7964		124.326	95.4359
117.868	94.8058	118.403	94.794	114.525	96.5061	114.313	96.4114	118.999	95.8213	118.186	95.7705	124.702	95.5636	136.224	95.3065		117.618	94.8057		114.269	96.4594		118.743	95.7961		124.454	95.4358
117.998	94.8032	118.533	94.7904	114.65	96.5058	114.442	96.4107	119.126	95.8208	118.312	95.7703	124.831	95.5634	136.354	95.3058		117.743	94.8027		114.397	96.4591		118.871	95.7961		124.578	95.4356
118.122	94.8008	118.659	94.7869	114.778	96.5058	114.574	96.4099	119.252	95.8208	118.436	95.7703	124.955	95.5628	136.475	95.3049		117.868	94.7999		114.525	96.4587		118.999	95.7959		124.702	95.4351
118.25	94.7982	118.785	94.7836	114.901	96.5059	114.7	96.4093	119.375	95.8209	118.564	95.7703	125.087	95.5623	136.597	95.3044		117.998	94.7968		114.65	96.4582		119.126	95.7955		124.831	95.4346
118.373	94.7955	118.911	94.7802	115.029	96.5062	114.823	96.4089	119.504	95.8209	118.688	95.7701	125.206	95.5617	136.72	95.3039		118.122	94.7938		114.778	96.4579		119.252	95.7956		124.955	95.4339
118.499	94.7929	119.04	94.7769	115.156	96.5057	114.951	96.4081	119.63	95.8205	118.818	95.77	125.335	95.5614	136.846	95.3036		118.25	94.7909		114.901	96.4576		119.375	95.7956		125.087	95.4333
118.624	94.7906	119.164	94.7738	115.284	96.505	115.08	96.4072	119.754	95.8201	118.942	95.77	125.459	95.5612	136.968	95.3033		118.373	94.7878		115.029	96.4575		119.504	95.7955		125.206	95.4328
118.752	94.788	119.288	94.7706	115.411	96.5041	115.206	96.4065	119.881	95.8199	119.067	95.7699	125.583	95.5612	137.094	95.3027		118.499	94.7849		115.156	96.4569		119.63	95.7952		125.335	95.4325
118.877	94.7853	119.419	94.7674	115.535	96.5036	115.334	96.406	120.008	95.8195	119.192	95.7696	125.708	95.5612	137.219	95.302		118.624	94.7822		115.284	96.4561		119.754	95.7951		125.459	95.4322
119.003	94.7826	119.549	94.764	115.667	96.5029	115.462	96.4054	120.134	95.8191	119.315	95.7693	125.833	95.5609	137.344	95.3015		118.752	94.7793		115.411	96.4553		119.881	95.7949		125.583	95.4319
119.127	94.7798	119.674	94.7606	115.788	96.5028	115.588	96.4046	120.258	95.819	119.443	95.7691	125.959	95.5612	137.469	95.3018		118.877	94.7763		115.535	96.4548		120.008	95.7946		125.708	95.4316
119.255	94.7772	119.802	94.7574	115.918	96.5027	115.717	96.4038	120.38	95.8189	119.569	95.769	126.082	95.5614	137.598	95.3018		119.003	94.7733		115.667	96.4541		120.134	95.7942		125.833	95.4312
119.378	94.7747	119.927	94.7541	116.044	96.5024	115.844	96.4032	120.507	95.8183	119.695	95.7685	126.209	95.5614	137.722	95.3019		119.127	94.7702		115.788	96.4537		120.258	95.7941		125.959	95.4315
119.508	94.772	120.056	94.7508	116.167	96.5021	115.974	96.4025	120.635	95.8178	119.82	95.7683	126.336	95.5614	137.842	95.3019		119.255	94.7673		115.918	96.4533		120.38	95.794		126.082	95.4316
119.63	94.7699	120.183	94.7477	116.294	96.5018	116.095	96.4016	120.756	95.8172	119.946	95.7682	126.46	95.5613	137.968	95.302		119.378	94.7644		116.044	96.4528		120.507	95.7934		126.209	95.4316
119.761	94.7677	120.309	94.7445	116.423	96.5019	116.221	96.4008	120.885	95.8169	120.072	95.7679	126.585	95.561	138.094	95.3021		119.508	94.7614		116.167	96.4523		120.635	95.7931		126.336	95.4316
119.883	94.7654	120.437	94.7413	116.546	96.5023	116.352	96.4002	121.012	95.8168	120.201	95.7676	126.709	95.5607	138.216	95.3021		119.63	94.7588		116.294	96.4517		120.756	95.7927		126.46	95.4317
120.009	94.7631	120.558	94.7381	116.673	96.5023	116.477	96.3993	121.135	95.8166	120.324	95.7674	126.837	95.5606	138.34	95.302		119.761	94.7561		116.423	96.4514		120.885	95.7924		126.585	95.4315
120.134	94.7605	120.69	94.735	116.798	96.5025	116.606	96.3986	121.259	95.8165	120.45	95.7671	126.96	95.5602	138.464	95.3018		119.883	94.7533		116.546	96.4513		121.012	95.7922		126.709	95.4314
120.267	94.7582	120.813	94.7319	116.93	96.5023	116.732	96.398	121.387	95.8162	120.578	95.7667	127.082	95.5605	138.593	95.3015		120.009	94.7506		116.673	96.4508		121.135	95.792		126.837	95.4313
120.383	94.7559	120.94	94.729	117.05	96.5018	116.858	96.3976	121.51	95.8155	120.703	95.7663	127.208	95.5603	138.714	95.301		120.134	94.7477		116.798	96.4505		121.259	95.7918		126.96	95.431
120.513	94.7533	121.067	94.7261	117.181	96.5017	116.985	96.3971	121.638	95.815	120.827	95.7657	127.338	95.5602	138.838	95.3004		120.267	94.745		116.93	96.4501		121.387	95.7915		127.082	95.431
120.636	94.7504	121.193	94.723	117.3	96.502	117.109	96.3965	121.762	95.8147	120.955	95.7655	127.464	95.5608	138.962	95.2993		120.383	94.7425		117.05	96.4497		121.51	95.7909		127.208	95.4307
120.764	94.7481	121.319	94.7201	117.43	96.5019	117.235	96.3958	121.889	95.8143	121.083	95.7648	127.589	95.5611	139.087	95.2981		120.513	94.7397		117.181	96.4494		121.638	95.7904		127.338	95.4303
120.888	94.7459	121.446	94.717	117.554	96.5014	117.364	96.3952	122.011	95.8143	121.203	95.7641	127.712	95.5611	139.215	95.2966		120.636	94.7367		117.3	96.4492		121.762	95.7901		127.464	95.4301
121.017	94.7434	121.574	94.7141	117.679	96.5006	117.493	96.3946	122.137	95.8143	121.331	95.7637	127.841	95.5612	139.338	95.2951		120.764	94.7341		117.43	96.4488		121.889	95.7896		127.589	95.4296
121.138	94.7408	121.698	94.7111	117.808	96.5001	117.617	96.394	122.264	95.814	121.46	95.7632	127.963	95.561	139.465	95.2939		120.888	94.7314		117.554	96.4483		122.011	95.7892		127.712	95.4288
121.268	94.7382	121.825	94.7081	117.936	96.4995	117.746	96.3939	122.39	95.8141	121.585	95.7627	128.089	95.5606	139.585	95.2926		121.017	94.7288		117.679	96.4476		122.137	95.789		127.841	95.4281
121.39	94.7361	121.957	94.7051	118.059	96.4989	117.873	96.3933	122.513	95.8139	121.709	95.7624	128.212	95.5604	139.709	95.2916		121.138	94.726		117.808	96.4471		122.264	95.7886		127.963	95.4275
121.519	94.7338	122.082	94.7021	118.188	96.4985	117.996	96.3925	122.638	95.8138	121.831	95.7622	128.338	95.5601	139.833	95.2909		121.268	94.7231		117.936	96.4467		122.39	95.7884		128.089	95.4266
121.641	94.7315	122.208	94.699	118.315	96.4977	118.119	96.3916	122.765	95.8143	121.96	95.7619	128.464	95.56	139.959	95.2901		121.39	94.7206		118.059	96.4461		122.513	95.7882		128.212	95.426
121.768	94.7292	122.334	94.696	118.442	96.4969	118.246	96.3907	122.884	95.8148	122.082	95.7618	128.589	95.5598	140.087	95.2893		121.519	94.718		118.188	96.4455		122.638	95.788		128.338	95.4255
121.891	94.7272	122.456	94.6934	118.566	96.496	118.377	96.3899	123.011	95.8149	122.207	95.7615	128.713	95.5597	140.211	95.2887		121.641	94.7152		118.315	96.4447		122.765	95.7881		128.464	95.425
122.017	94.7253	122.586	94.6905	118.694	96.4956	118.505	96.3891	123.138	95.8149	122.332	95.7615	128.834	95.5596	140.334	95.2886		121.768	94.7126		118.442	96.4438		122.884	95.7883		128.589	95.4245
122.144	94.7229	122.712	94.6876	118.817	96.4951	118.632	96.3883	123.263	95.8146	122.457	95.7616	128.962	95.56	140.461	95.2884		121.891	94.7103		118.566	96.443		123.011	95.7882		128.713	95.4242
122.267	94.7206	122.836	94.6847	118.943	96.495	118.756	96.3876	123.385	95.8142	122.585	95.7616	129.084	95.5603	140.589	95.2885		122.017	94.7079		118.694	96.4424		123.138	95.7882		128.834	95.4241
122.388	94.7186	122.965	94.6821	119.069	96.4944	118.88	96.3866	123.514	95.8139	122.71	95.7615	129.208	95.5605	140.71	95.2882		122.144	94.7053		118.817	96.4417		123.263	95.7881		128.962	95.4242
122.514	94.7168	123.093	94.6795	119.198	96.4944	119.006	96.3855	123.64	95.8136	122.835	95.7616	129.331	95.5605	140.836	95.2879		122.267	94.7027		118.943	96.4413		123.385	95.7879		129.084	95.4244
122.639	94.7147	123.221	94.6768	119.32	96.4946	119.132	96.3848	123.762	95.8134	122.959	95.7616	129.461	95.5606	140.962	95.2875		122.388	94.7003		119.069	96.4405		123.514	95.7877		129.208	95.4244
122.768	94.7123	123.343	94.6743	119.449	96.4952	119.257	96.3841	123.888	95.8132	123.089	95.7614	129.583	95.5605	141.089	95.2869		122.514	94.6981		119.198	96.44		123.64	95.7876		129.331	95.4242
122.893	94.7106	123.469	94.6715	119.574	96.4956	119.385	96.3834	124.011	95.8128	123.212	95.7612	129.71	95.5604	141.21	95.2866		122.639	94.6958		119.32	96.4397		123.762	95.7875		129.461	95.4241
123.023	94.7089	123.597	94.6687	119.702	96.4955	119.512	96.3826	124.135	95.8123	123.336	95.7611	129.836	95.5603	141.335	95.2862		122.768	94.6933		119.449	96.4397		123.888	95.7873		129.583	95.4237
123.145	94.7069	123.723	94.6659	119.825	96.4949	119.636	96.3821	124.264	95.812	123.461	95.7613	129.956	95.5599	141.461	95.2861		122.893	94.691		119.574	96.4395		124.011	95.787		129.71	95.4235
123.272	94.7047	123.846	94.6633	119.954	96.4939	119.763	96.3816	124.391	95.812	123.586	95.7612	130.084	95.5594	141.584	95.2854		123.023	94.6888		119.702	96.439		124.135	95.7867		129.836	95.4233
123.396	94.7024	123.975	94.6605	120.078	96.4931	119.887	96.3811	124.515	95.8121	123.713	95.7609	130.208	95.5588	141.706	95.2848		123.145	94.6864		119.825	96.4385		124.264	95.7867		129.956	95.423
123.52	94.7001	124.104	94.6576	120.202	96.4922	120.016	96.3805	124.636	95.8124	123.839	95.7607	130.337	95.5583	141.834	95.2841		123.272	94.684		119.954	96.4378		124.391	95.7866		130.084	95.4224
123.648	94.698	124.23	94.6547	120.327	96.4911	120.14	96.3801	124.763	95.8126	123.96	95.7606	130.464	95.5578	141.96	95.2835		123.396	94.6814		120.078	96.4371		124.515	95.7865		130.208	95.4218
123.773	94.6958	124.352	94.6519	120.449	96.49	120.264	96.3798	124.887	95.8124	124.091	95.7602	130.586	95.558	142.08	95.283		123.52	94.6788		120.202	96.4363		124.636	95.7865		130.337	95.4212
123.896	94.6935	124.478	94.6492	120.577	96.4881	120.39	96.3792	125.011	95.8123	124.215	95.7599	130.713	95.5582	142.204	95.2823		123.648	94.6764		120.327	96.4356		124.763	95.7866		130.464	95.4207
124.024	94.6913	124.603	94.6465	120.702	96.4861	120.519	96.3786	125.137	95.8123	124.339	95.76	130.836	95.5583	142.333	95.2816		123.773	94.6738		120.449	96.4349		124.887	95.7863		130.586	95.4205
124.15	94.6888	124.731	94.644	120.828	96.4845	120.646	96.3783	125.261	95.8124	124.467	95.7601	130.962	95.5583	142.458	95.2805		123.896	94.6713		120.577	96.4337		125.011	95.7861		130.713	95.4203
124.277	94.6864	124.856	94.6414	120.952	96.483	120.77	96.3778	125.387	95.812	124.588	95.7598	131.085	95.5581	142.584	95.2798		124.024	94.6689		120.702	96.4324		125.137	95.7861		130.836	95.42
124.4	94.6841	124.981	94.6388	121.081	96.4821	120.893	96.3773	125.514	95.8117	124.716	95.7594	131.211	95.5581	142.709	95.2788		124.15	94.6664		120.828	96.4314		125.261	95.7862		130.962	95.4194
124.525	94.6818	125.107	94.6363	121.202	96.4815	121.017	96.3766	125.634	95.8116	124.838	95.7593	131.334	95.5581	142.831	95.278		124.277	94.6639		120.952	96.4304		125.387	95.7859		131.085	95.4189
124.647	94.6801	125.236	94.6339	121.329	96.4809	121.141	96.3758	125.761	95.8113	124.964	95.7592	131.463	95.5583	142.957	95.2775		124.4	94.6615		121.081	96.4297		125.514	95.7856		131.211	95.4184
124.774	94.6784	125.362	94.6318	121.455	96.4806	121.268	96.3752	125.882	95.811	125.091	95.7588	131.585	95.5586	143.082	95.2766		124.525	94.6591		121.202	96.429		125.634	95.7854		131.334	95.418
124.898	94.6767	125.488	94.6292	121.578	96.4805	121.396	96.3747	126.009	95.8108	125.215	95.7587	131.708	95.5584	143.204	95.2759		124.647	94.657		121.329	96.4283		125.761	95.7852		131.463	95.4179
125.024	94.6745	125.613	94.6268	121.706	96.4805	121.522	96.3742	126.137	95.8108	125.344	95.7584	131.832	95.5579	143.33	95.2754		124.774	94.6551		121.455	96.4279		125.882	95.7849		131.585	95.4176
125.147	94.6727	125.741	94.6242	121.829	96.4809	121.642	96.3737	126.256	95.8107	125.465	95.7583	131.958	95.5573	143.456	95.275		124.898	94.6529		121.578	96.4276		126.009	95.7847		131.708	95.4171
125.273	94.6709	125.861	94.6216	121.953	96.4813	121.77	96.3733	126.384	95.8105	125.588	95.7579	132.084	95.557	143.587	95.2749		125.024	94.6507		121.706	96.4274		126.137	95.7846		131.832	95.4167
125.396	94.6689	125.989	94.619	122.078	96.4818	121.895	96.3726	126.509	95.8102	125.716	95.7576	132.209	95.5567	143.707	95.2747		125.147	94.6484		121.829	96.4273		126.256	95.7845		131.958	95.4162
125.524	94.6672	126.118	94.6165	122.206	96.4821	122.018	96.3723	126.633	95.8103	125.843	95.7574	132.336	95.5564	143.828	95.2741		125.273	94.6463		121.953	96.4273		126.384	95.7842		132.084	95.4159
125.648	94.6654	126.244	94.614	122.331	96.482	122.144	96.3718	126.759	95.8101	125.967	95.7572	132.459	95.5562	143.958	95.2737		125.396	94.6439		122.078	96.4272		126.509	95.7839		132.209	95.4157
125.774	94.6634	126.369	94.6114	122.453	96.4822	122.268	96.3717	126.879	95.8099	126.092	95.7569	132.581	95.5561	144.08	95.2732		125.524	94.6418		122.206	96.4272		126.633	95.7839		132.336	95.4153
125.897	94.6612	126.495	94.6088	122.582	96.4819	122.393	96.3715	127.002	95.8098	126.216	95.7569	132.708	95.5559	144.207	95.2726		125.648	94.6397		122.331	96.4269		126.759	95.7836		132.459	95.4149
126.024	94.6589	126.622	94.606	122.703	96.4814	122.522	96.3712	127.13	95.8097	126.341	95.7567	132.83	95.5559	144.331	95.2723		125.774	94.6374		122.453	96.4269		126.879	95.7834		132.581	95.4146
126.146	94.6566	126.748	94.6036	122.83	96.4812	122.648	96.3708	127.255	95.8092	126.465	95.7566	132.96	95.5565	144.459	95.272		125.897	94.635		122.582	96.4267		127.002	95.7834		132.708	95.4143
126.272	94.6547	126.872	94.6009	122.955	96.4806	122.773	96.3703	127.381	95.8089	126.592	95.7566	133.082	95.5566	144.581	95.2713		126.024	94.6325		122.703	96.4263		127.13	95.7832		132.83	95.4141
126.398	94.6528	126.998	94.5983	123.076	96.4799	122.897	96.3702	127.503	95.8086	126.717	95.7562	133.207	95.5572	144.705	95.2706		126.146	94.6301		122.83	96.426		127.255	95.7829		132.96	95.4143
126.528	94.6508	127.126	94.5956	123.205	96.4794	123.021	96.3699	127.629	95.8082	126.839	95.7561	133.331	95.5577	144.832	95.2694		126.272	94.6278		122.955	96.4254		127.381	95.7828		133.082	95.414
126.649	94.6491	127.248	94.593	123.328	96.4782	123.146	96.3697	127.751	95.8079	126.964	95.756	133.455	95.558	144.957	95.2686		126.398	94.6255		123.076	96.425		127.503	95.7824		133.207	95.4139
126.775	94.6473	127.376	94.5905	123.458	96.4776	123.273	96.3693	127.876	95.8075	127.089	95.7559	133.578	95.5581	145.082	95.2684		126.528	94.6232		123.205	96.4246		127.629	95.7821		133.331	95.4136
126.9	94.6451	127.499	94.5879	123.58	96.4774	123.399	96.3687	128.003	95.8074	127.217	95.7558	133.704	95.5583	145.208	95.268		126.649	94.621		123.328	96.424		127.751	95.782		133.455	95.4133
127.027	94.6434	127.628	94.5853	123.705	96.4771	123.521	96.3681	128.125	95.807	127.343	95.7556	133.828	95.5589	145.331	95.2674		126.775	94.6189		123.458	96.4235		127.876	95.7817		133.578	95.4133
127.149	94.6416	127.752	94.5831	123.83	96.4782	123.647	96.3675	128.252	95.8068	127.468	95.7554	133.952	95.5588	145.458	95.2667		126.9	94.6165		123.58	96.4231		128.003	95.7816		133.704	95.4132
127.275	94.6398	127.876	94.5808	123.953	96.4794	123.774	96.3668	128.376	95.8066	127.594	95.7553	134.076	95.5584	145.584	95.2662		127.027	94.6144		123.705	96.4226		128.125	95.7813		133.828	95.4132
127.396	94.6382	128.003	94.5783	124.076	96.4801	123.899	96.3663	128.498	95.8065	127.719	95.755	134.202	95.5573	145.709	95.2656		127.149	94.6123		123.83	96.4229		128.252	95.7811		133.952	95.4128
127.525	94.6367	128.125	94.5762	124.202	96.481	124.022	96.3658	128.626	95.8064	127.84	95.7547	134.328	95.5571	145.835	95.2652		127.275	94.6103		123.953	96.4231		128.376	95.7809		134.076	95.4123
127.648	94.6351	128.252	94.574	124.324	96.482	124.149	96.3655	128.748	95.806	127.967	95.7547	134.453	95.5568	145.959	95.265		127.396	94.6082		124.076	96.4232		128.498	95.7807		134.202	95.4115
127.771	94.6333	128.377	94.5721	124.453	96.4828	124.269	96.3651	128.873	95.8062	128.09	95.7543	134.577	95.5564	146.083	95.2651		127.525	94.6064		124.202	96.4234		128.626	95.7805		134.328	95.4111
127.896	94.6314	128.503	94.5699	124.576	96.4842	124.396	96.3645	128.998	95.8061	128.213	95.7538	134.701	95.5562	146.209	95.2651		127.648	94.6046		124.324	96.4237		128.748	95.7803		134.453	95.4109
128.027	94.6291	128.626	94.5677	124.697	96.4853	124.518	96.3638	129.119	95.8061	128.338	95.7536	134.822	95.5562	146.333	95.2645		127.771	94.6027		124.453	96.4239		128.873	95.7802		134.577	95.4108
128.145	94.6271	128.754	94.5656	124.822	96.486	124.644	96.3633	129.245	95.8062	128.464	95.7533	134.947	95.5559	146.457	95.264		127.896	94.6006		124.576	96.4243		128.998	95.78		134.701	95.4107
128.272	94.6254	128.878	94.5637	124.948	96.4868	124.771	96.3629	129.367	95.806	128.591	95.7529	135.073	95.5553	146.581	95.2636		128.027	94.5984		124.697	96.4246		129.119	95.7799		134.822	95.4104
128.398	94.6234	129.004	94.5614	125.073	96.4869	124.896	96.3624	129.495	95.8057	128.715	95.7527	135.198	95.5555	146.707	95.2631		128.145	94.5964		124.822	96.4247		129.245	95.7797		134.947	95.4099
128.523	94.6218	129.131	94.5594	125.198	96.4869	125.021	96.3619	129.62	95.8055	128.839	95.7525	135.322	95.5556	146.835	95.2623		128.272	94.5945		124.948	96.4248		129.367	95.7795		135.073	95.4095
128.649	94.6199	129.255	94.5572	125.32	96.4865	125.145	96.3613	129.746	95.8054	128.963	95.7524	135.446	95.5561	146.959	95.2619		128.398	94.5924		125.073	96.4247		129.495	95.7792		135.198	95.4093
128.773	94.6176	129.379	94.5549	125.446	96.4859	125.268	96.3607	129.864	95.8052	129.087	95.7524	135.572	95.5562	147.085	95.2613		128.523	94.5906		125.198	96.4244		129.62	95.779		135.322	95.409
128.895	94.6155	129.504	94.5525	125.574	96.4854	125.393	96.3598	129.988	95.8051	129.21	95.7524	135.694	95.5559	147.211	95.2602		128.649	94.5885		125.32	96.4239		129.746	95.7789		135.446	95.409
129.023	94.6136	129.632	94.5502	125.697	96.4846	125.519	96.359	130.116	95.8049	129.336	95.7523	135.819	95.5553	147.334	95.2592		128.773	94.5863		125.446	96.4233		129.864	95.7788		135.572	95.4087
129.14	94.6118	129.755	94.5481	125.823	96.4838	125.642	96.3582	130.241	95.8047	129.462	95.7522	135.941	95.5551	147.458	95.2581		128.895	94.584		125.574	96.4226		129.988	95.7788		135.694	95.408
129.269	94.6099	129.884	94.5458	125.943	96.4828	125.764	96.3575	130.363	95.8043	129.585	95.752	136.064	95.5553	147.584	95.2571		129.023	94.5819		125.697	96.4218		130.116	95.7786		135.819	95.4073
129.394	94.6084	130.008	94.5435	126.07	96.4814	125.892	96.3568	130.487	95.8038	129.71	95.7516	136.188	95.5553	147.711	95.2561		129.14	94.5799		125.823	96.421		130.241	95.7784		135.941	95.4066
129.519	94.6065	130.137	94.5412	126.194	96.4799	126.017	96.356	130.613	95.8034	129.838	95.7515	136.315	95.555	147.837	95.2554		129.269	94.5778		125.943	96.4201		130.363	95.7781		136.064	95.4062
129.639	94.6045	130.261	94.5387	126.318	96.4782	126.14	96.3552	130.738	95.803	129.963	95.7514	136.436	95.5543	147.965	95.2545		129.394	94.576		126.07	96.4191		130.487	95.7777		136.188	95.4057
129.768	94.6023	130.387	94.5362	126.44	96.4765	126.265	96.3543	130.863	95.8027	130.088	95.7513	136.561	95.5538	148.084	95.2539		129.519	94.5738		126.194	96.418		130.613	95.7775		136.315	95.4052
129.893	94.6004	130.509	94.534	126.564	96.4756	126.388	96.3534	130.99	95.8026	130.21	95.7511	136.689	95.5533	148.21	95.2531		129.639	94.5716		126.318	96.4167		130.738	95.7772		136.436	95.4044
130.02	94.5985	130.633	94.5318	126.687	96.4749	126.515	96.3526	131.109	95.8025	130.33	95.7508	136.81	95.5529	148.339	95.2525		129.768	94.5693		126.44	96.4154		130.863	95.777		136.561	95.4038
130.141	94.5966	130.758	94.5294	126.813	96.4741	126.639	96.3521	131.23	95.8026	130.46	95.7506	136.937	95.5525	148.462	95.252		129.893	94.5672		126.564	96.4145		130.99	95.7768		136.689	95.4032
130.268	94.595	130.886	94.527	126.94	96.4734	126.764	96.3516	131.355	95.8026	130.581	95.7506	137.058	95.5522	148.585	95.2511		130.02	94.5651		126.687	96.4137		131.109	95.7767		136.81	95.4027
130.389	94.5934	131.012	94.5245	127.064	96.4728	126.885	96.3513	131.483	95.8025	130.704	95.7505	137.185	95.5519	148.712	95.2507		130.141	94.563		126.813	96.4131		131.23	95.7766		136.937	95.4022
130.518	94.5922	131.141	94.5222	127.186	96.4725	127.016	96.3511	131.604	95.8024	130.832	95.7505	137.307	95.5514	148.836	95.2504		130.268	94.561		126.94	96.4125		131.355	95.7766		137.058	95.4017
130.639	94.5906	131.263	94.5199	127.313	96.4724	127.139	96.3507	131.732	95.8021	130.957	95.7508	137.43	95.5513	148.963	95.2496		130.389	94.5589		127.064	96.412		131.483	95.7765		137.185	95.4013
130.765	94.5892	131.39	94.5175	127.434	96.4723	127.263	96.3504	131.854	95.8019	131.078	95.7508	137.558	95.5511	149.089	95.2488		130.518	94.5572		127.186	96.4118		131.604	95.7765		137.307	95.4009
130.888	94.588	131.513	94.5153	127.558	96.4724	127.385	96.3503	131.975	95.8021	131.208	95.7507	137.684	95.5513	149.214	95.2483		130.639	94.5553		127.313	96.4116		131.732	95.7764		137.43	95.4004
131.012	94.5865	131.637	94.5131	127.682	96.4724	127.513	96.3504	132.101	95.802	131.331	95.7504	137.806	95.5515	149.338	95.2472		130.765	94.5534		127.434	96.4114		131.854	95.7764		137.558	95.4
131.137	94.5848	131.764	94.5108	127.807	96.4724	127.641	96.3502	132.227	95.8019	131.457	95.7504	137.929	95.5516	149.464	95.2462		130.888	94.5516		127.558	96.4113		131.975	95.7764		137.684	95.3998
131.26	94.5833	131.89	94.5084	127.933	96.4721	127.763	96.3502	132.351	95.8016	131.58	95.7504	138.053	95.5519	149.588	95.2453		131.012	94.5498		127.682	96.4114		132.101	95.7762		137.806	95.3993
131.385	94.5817	132.016	94.5065	128.054	96.4718	127.884	96.3497	132.477	95.8012	131.705	95.7503	138.178	95.552	149.714	95.2445		131.137	94.5478		127.807	96.4113		132.227	95.7762		137.929	95.3989
131.512	94.5797	132.141	94.5045	128.184	96.4715	128.011	96.3492	132.596	95.8009	131.828	95.7503	138.301	95.5523	149.842	95.2436		131.26	94.5459		127.933	96.4111		132.351	95.776		138.053	95.3986
131.638	94.578	132.264	94.5025	128.306	96.4713	128.136	96.3489	132.721	95.8008	131.954	95.7502	138.423	95.5525	149.966	95.2422		131.385	94.5441		128.054	96.4107		132.477	95.7758		138.178	95.3983
131.762	94.5759	132.391	94.5006	128.424	96.471	128.256	96.3481	132.845	95.8008	132.074	95.75	138.548	95.5522	150.092	95.2412		131.512	94.5421		128.184	96.4104		132.596	95.7756		138.301	95.3979
131.886	94.5738	132.515	94.4985	128.552	96.4704	128.38	96.3475	132.968	95.8012	132.2	95.7497	138.671	95.5522	150.216	95.2404		131.638	94.5402		128.306	96.4101		132.721	95.7755		138.423	95.3973
132.009	94.5718	132.636	94.4965	128.677	96.4702	128.506	96.3469	133.093	95.8015	132.323	95.7495	138.797	95.552	150.342	95.2393		131.762	94.5382		128.424	96.4095		132.845	95.7754		138.548	95.3967
132.13	94.5699	132.762	94.4946	128.8	96.47	128.63	96.346	133.219	95.8018	132.449	95.7494	138.923	95.5516	150.468	95.2385		131.886	94.5362		128.552	96.409		132.968	95.7755		138.671	95.3963
132.26	94.5678	132.891	94.4926	128.925	96.4701	128.751	96.3452	133.343	95.802	132.573	95.7494	139.046	95.5512	150.593	95.2382		132.009	94.5342		128.677	96.4085		133.093	95.7755		138.797	95.3957
132.381	94.5661	133.015	94.4906	129.049	96.4695	128.878	96.3446	133.472	95.8021	132.701	95.749	139.171	95.5511	150.72	95.237		132.13	94.5322		128.8	96.408		133.219	95.7756		138.923	95.3951
132.509	94.5644	133.137	94.4888	129.173	96.469	129.002	96.3438	133.589	95.8023	132.821	95.7484	139.292	95.5505	150.842	95.236		132.26	94.5302		128.925	96.4077		133.343	95.7757		139.046	95.3947
132.627	94.5623	133.262	94.4866	129.296	96.4686	129.124	96.3433	133.717	95.8024	132.946	95.7479	139.417	95.5501	150.968	95.2352		132.381	94.5284		129.049	96.407		133.472	95.7756		139.171	95.3941
132.755	94.5607	133.388	94.4847	129.421	96.4683	129.251	96.3426	133.838	95.8022	133.072	95.7473	139.54	95.55	151.095	95.2348		132.509	94.5266		129.173	96.4064		133.589	95.7754		139.292	95.3933
132.88	94.5588	133.512	94.4825	129.546	96.4678	129.373	96.3417	133.963	95.8017	133.197	95.7471	139.669	95.5496	151.218	95.2346		132.627	94.5245		129.296	96.4059		133.717	95.7751		139.417	95.3927
133.007	94.5569	133.639	94.4803	129.67	96.4669	129.499	96.3415	134.088	95.8013	133.319	95.7469	139.79	95.5492	151.343	95.2341		132.755	94.5227		129.421	96.4054		133.838	95.7747		139.54	95.3924
133.128	94.555	133.763	94.4782	129.795	96.4666	129.621	96.341	134.21	95.8007	133.445	95.7469	139.91	95.5488	151.469	95.2337		132.88	94.5207		129.546	96.4048		133.963	95.7744		139.669	95.3921
133.255	94.5532	133.886	94.4761	129.922	96.466	129.747	96.3406	134.331	95.8001	133.57	95.7468	140.035	95.5486	151.598	95.2333		133.007	94.5186		129.67	96.4042		134.088	95.7741		139.79	95.3917
133.376	94.5516	134.012	94.474	130.046	96.4657	129.873	96.3403	134.461	95.7996	133.693	95.7466	140.161	95.5484	151.72	95.2324		133.128	94.5166		129.795	96.4038		134.21	95.7738		139.91	95.3912
133.502	94.5502	134.137	94.4717	130.165	96.4652	129.998	96.34	134.581	95.7993	133.814	95.7464	140.287	95.5484	151.842	95.2316		133.255	94.5146		129.922	96.4033		134.331	95.7735		140.035	95.391
133.627	94.5483	134.26	94.4696	130.291	96.4653	130.119	96.3395	134.704	95.7988	133.938	95.7465	140.408	95.5483	151.968	95.2312		133.376	94.5128		130.046	96.403		134.461	95.7731		140.161	95.3904
133.753	94.5465	134.389	94.4673	130.414	96.4655	130.243	96.3389	134.831	95.7986	134.068	95.7465	140.53	95.5482	152.097	95.2307		133.502	94.5109		130.165	96.4026		134.581	95.7729		140.287	95.39
133.876	94.545	134.514	94.465	130.539	96.4651	130.369	96.3382	134.955	95.7986	134.192	95.7467	140.655	95.5482	152.223	95.23		133.627	94.5089		130.291	96.4024		134.704	95.7727		140.408	95.3898
133.999	94.5433	134.64	94.4626	130.663	96.4648	130.494	96.3377	135.081	95.7987	134.317	95.7467	140.781	95.5481	152.35	95.229		133.753	94.5069		130.414	96.4022		134.831	95.7726		140.53	95.3895
134.12	94.5414	134.764	94.4604	130.787	96.4646	130.618	96.3372	135.205	95.799	134.435	95.7464	140.902	95.5479	152.474	95.228		133.876	94.505		130.539	96.4016		134.955	95.7726		140.655	95.3891
134.246	94.5399	134.886	94.4583	130.914	96.4643	130.744	96.3366	135.328	95.7992	134.565	95.7464	141.022	95.5478	152.598	95.2267		133.999	94.503		130.663	96.4013		135.081	95.7727		140.781	95.3885
134.371	94.5381	135.01	94.456	131.035	96.4642	130.867	96.3364	135.452	95.7996	134.686	95.7459	141.149	95.5475	152.726	95.2258		134.12	94.5009		130.787	96.4009		135.205	95.7727		140.902	95.388
134.496	94.5361	135.137	94.4539	131.16	96.464	130.99	96.336	135.576	95.7999	134.81	95.7456	141.273	95.5474	152.847	95.2248		134.246	94.4991		130.914	96.4005		135.328	95.7728		141.022	95.3873
134.622	94.5339	135.257	94.4517	131.283	96.4636	131.115	96.3356	135.701	95.8	134.936	95.7454	141.399	95.5475	152.972	95.2239		134.371	94.497		131.035	96.4003		135.452	95.7728		141.149	95.3866
134.745	94.532	135.385	94.4496	131.415	96.4634	131.24	96.3348	135.822	95.7998	135.061	95.7452	141.517	95.5475	153.103	95.2228		134.496	94.495		131.16	96.4		135.576	95.7728		141.273	95.3861
134.866	94.5302	135.51	94.4474	131.536	96.4631	131.362	96.3343	135.951	95.7994	135.185	95.7451	141.644	95.5477	153.224	95.222		134.622	94.4928		131.283	96.3996		135.701	95.7727		141.399	95.3857
134.995	94.5286	135.634	94.4454	131.661	96.4629	131.485	96.3337	136.071	95.7991	135.311	95.745	141.765	95.5479	153.352	95.2211		134.745	94.4908		131.415	96.3991		135.822	95.7725		141.517	95.3852
135.115	94.5268	135.758	94.4432	131.783	96.4631	131.609	96.3329	136.194	95.7985	135.435	95.7446	141.894	95.5478	153.478	95.2201		134.866	94.4888		131.536	96.3987		135.951	95.7723		141.644	95.3849
135.24	94.5249	135.882	94.4413	131.909	96.4626	131.734	96.3322	136.317	95.7978	135.557	95.7444	142.015	95.5476	153.605	95.2194		134.995	94.487		131.661	96.3983		136.071	95.772		141.765	95.3845
135.366	94.5233	136.007	94.4393	132.03	96.462	131.858	96.3316	136.443	95.7972	135.678	95.7443	142.14	95.5476	153.731	95.2184		135.115	94.485		131.783	96.398		136.194	95.7716		141.894	95.384
135.491	94.5215	136.134	94.4373	132.158	96.4618	131.98	96.3311	136.566	95.7968	135.806	95.7439	142.266	95.5477	153.854	95.2175		135.24	94.4831		131.909	96.3974		136.317	95.7711		142.015	95.3835
135.614	94.5198	136.261	94.4352	132.28	96.4614	132.105	96.3303	136.687	95.7966	135.929	95.7439	142.389	95.548	153.978	95.2164		135.366	94.4813		132.03	96.3968		136.443	95.7707		142.14	95.383
135.736	94.5182	136.382	94.433	132.404	96.4611	132.231	96.3296	136.815	95.7963	136.059	95.7436	142.515	95.5477	154.109	95.2155		135.491	94.4794		132.158	96.3965		136.566	95.7704		142.266	95.3826
135.86	94.5167	136.507	94.431	132.522	96.4609	132.355	96.3292	136.942	95.7961	136.176	95.7432	142.634	95.5472	154.231	95.2151		135.614	94.4775		132.28	96.3958		136.687	95.7702		142.389	95.3822
135.988	94.5148	136.63	94.429	132.648	96.4603	132.478	96.3288	137.068	95.7961	136.301	95.7429	142.757	95.5464	154.356	95.2143		135.736	94.4756		132.404	96.3953		136.815	95.7699		142.515	95.3816
136.112	94.5128	136.753	94.4271	132.773	96.4597	132.602	96.328	137.19	95.7961	136.426	95.7424	142.885	95.5459	154.483	95.2137		135.86	94.4739		132.522	96.3951		136.942	95.7697		142.634	95.3811
136.238	94.5105	136.882	94.4252	132.901	96.4589	132.728	96.3278	137.315	95.7959	136.548	95.7424	143.009	95.5456	154.608	95.2129		135.988	94.4719		132.648	96.3946		137.068	95.7695		142.757	95.3804
136.362	94.5088	137.005	94.4235	133.023	96.4581	132.855	96.3276	137.442	95.7959	136.672	95.7424	143.137	95.5453	154.737	95.2121		136.112	94.4699		132.773	96.3939		137.19	95.7693		142.885	95.3798
136.486	94.5067	137.132	94.4214	133.153	96.4579	132.975	96.3272	137.563	95.7959	136.799	95.7422	143.256	95.545	154.861	95.2111		136.238	94.4679		132.901	96.3934		137.315	95.7691		143.009	95.3792
136.606	94.5048	137.261	94.4192	133.274	96.4581	133.104	96.3266	137.686	95.7958	136.921	95.742	143.379	95.5447	154.987	95.2102		136.362	94.4661		133.023	96.3929		137.442	95.7692		143.137	95.3787
136.736	94.5028	137.382	94.4169	133.397	96.4577	133.228	96.3261	137.81	95.7955	137.047	95.7417	143.5	95.5443	155.113	95.2093		136.486	94.464		133.153	96.3925		137.563	95.769		143.256	95.3781
136.855	94.5006	137.506	94.415	133.519	96.4572	133.349	96.3255	137.935	95.7952	137.171	95.7415	143.626	95.5439	155.236	95.2086		136.606	94.462		133.274	96.3923		137.686	95.7689		143.379	95.3774
136.984	94.4985	137.633	94.4128	133.644	96.4569	133.471	96.3248	138.06	95.7948	137.294	95.7414	143.751	95.5438	155.365	95.2074		136.736	94.4599		133.397	96.3919		137.81	95.7686		143.5	95.3768
137.111	94.4966	137.755	94.4105	133.769	96.4564	133.595	96.324	138.179	95.7943	137.415	95.7414	143.875	95.5438	155.49	95.2056		136.855	94.4578		133.519	96.3914		137.935	95.7684		143.626	95.3763
137.23	94.4948	137.878	94.4082	133.895	96.4563	133.72	96.3234	138.308	95.7941	137.541	95.741	144.001	95.5437	155.618	95.2044		136.984	94.4556		133.644	96.3908		138.06	95.7681		143.751	95.3756
137.351	94.4927	137.998	94.4059	134.014	96.4561	133.846	96.3229	138.432	95.7939	137.666	95.7408	144.122	95.5434	155.741	95.2031		137.111	94.4535		133.769	96.3902		138.179	95.7678		143.875	95.3747
137.479	94.4909	138.123	94.4034	134.141	96.4564	133.97	96.3221	138.553	95.7934	137.788	95.7404	144.246	95.5429	155.871	95.2018		137.23	94.4515		133.895	96.3899		138.308	95.7675		144.001	95.374
137.603	94.4886	138.25	94.4008	134.265	96.4566	134.093	96.3213	138.677	95.7928	137.912	95.7401	144.373	95.5428	155.991	95.2005		137.351	94.4493		134.014	96.3895		138.432	95.7673		144.122	95.3732
137.724	94.4869	138.375	94.3984	134.392	96.4569	134.217	96.3206	138.802	95.7926	138.036	95.7399	144.495	95.5424	156.123	95.1995		137.479	94.4471		134.141	96.3893		138.553	95.7669		144.246	95.3723
137.849	94.4848	138.499	94.3961	134.514	96.4567	134.343	96.3201	138.925	95.7923	138.162	95.7398	144.622	95.5422	156.242	95.1988		137.603	94.4447		134.265	96.389		138.677	95.7664		144.373	95.3717
137.974	94.4829	138.628	94.3939	134.637	96.4572	134.465	96.3192	139.051	95.7919	138.282	95.7397	144.743	95.5421	156.37	95.1979		137.724	94.4427		134.392	96.3888		138.802	95.7662		144.495	95.3709
138.097	94.4812	138.753	94.3915	134.762	96.4574	134.593	96.3188	139.176	95.7917	138.408	95.7394	144.867	95.5416	156.494	95.1972		137.849	94.4404		134.514	96.3884		138.925	95.766		144.622	95.3705
138.223	94.4794	138.873	94.3893	134.885	96.4575	134.714	96.3183	139.298	95.7914	138.533	95.7391	144.988	95.5413	156.619	95.1966		137.974	94.4384		134.637	96.3882		139.051	95.7658		144.743	95.37
138.345	94.4771	138.998	94.387	135.006	96.4568	134.841	96.3179	139.421	95.7912	138.657	95.7389	145.114	95.5411	156.741	95.1962		138.097	94.4363		134.762	96.3881		139.176	95.7656		144.867	95.3694
138.469	94.4752	139.127	94.3849	135.134	96.456	134.966	96.3172	139.544	95.7906	138.781	95.7389	145.239	95.5409	156.87	95.1954		138.223	94.4343		134.885	96.3879		139.298	95.7653		144.988	95.369
138.593	94.4737	139.25	94.3828	135.258	96.4556	135.089	96.3163	139.672	95.7903	138.906	95.7387	145.365	95.5407	156.994	95.1947		138.345	94.4321		135.006	96.3874		139.421	95.7651		145.114	95.3687
138.717	94.4717	139.373	94.3807	135.384	96.4548	135.214	96.3157	139.793	95.7903	139.032	95.7385	145.483	95.5407	157.123	95.1937		138.469	94.43		135.134	96.3866		139.544	95.7648		145.239	95.3682
138.84	94.4701	139.501	94.3788	135.505	96.4538	135.338	96.3152	139.916	95.7903	139.157	95.7382	145.607	95.5402	157.246	95.1929		138.593	94.4283		135.258	96.3859		139.672	95.7645		145.365	95.3677
138.971	94.4685	139.622	94.3768	135.631	96.4527	135.464	96.3148	140.039	95.7901	139.281	95.738	145.731	95.5403	157.373	95.1918		138.717	94.4262		135.384	96.3852		139.793	95.7644		145.483	95.3672
139.09	94.467	139.745	94.3746	135.755	96.452	135.59	96.3144	140.165	95.7901	139.402	95.7375	145.858	95.5401	157.496	95.1905		138.84	94.4244		135.505	96.3845		139.916	95.7643		145.607	95.3665
139.214	94.4653	139.876	94.3726	135.883	96.4509	135.712	96.3139	140.289	95.79	139.526	95.7373	145.978	95.5397	157.624	95.1892		138.971	94.4226		135.631	96.3837		140.039	95.764		145.731	95.3661
139.338	94.4635	139.997	94.3705	136.003	96.45	135.838	96.3133	140.417	95.7894	139.648	95.7372	146.107	95.5391	157.753	95.1878		139.09	94.4208		135.755	96.3832		140.165	95.7638		145.858	95.3653
139.466	94.4619	140.124	94.3682	136.134	96.4491	135.96	96.3125	140.54	95.7892	139.776	95.7369	146.231	95.5386	157.876	95.1865		139.214	94.419		135.883	96.3824		140.289	95.7636		145.978	95.3644
139.59	94.4604	140.249	94.3661	136.256	96.4485	136.087	96.3116	140.662	95.7889	139.9	95.7367	146.355	95.5383	158.001	95.1856		139.338	94.417		136.003	96.3816		140.417	95.7633		146.107	95.3634
139.716	94.4583	140.376	94.3638	136.377	96.4478	136.206	96.3109	140.785	95.7886	140.019	95.7366	146.475	95.5381	158.127	95.1845		139.466	94.415		136.134	96.3808		140.54	95.763		146.231	95.3626
139.84	94.4561	140.499	94.3613	136.501	96.447	136.332	96.3106	140.911	95.7884	140.149	95.7365	146.596	95.5376	158.254	95.1832		139.59	94.4132		136.256	96.38		140.662	95.7628		146.355	95.3619
139.964	94.4545	140.623	94.359	136.627	96.446	136.458	96.3101	141.035	95.7883	140.269	95.7362	146.726	95.537	158.376	95.1823		139.716	94.4111		136.377	96.3794		140.785	95.7626		146.475	95.3613
140.086	94.4524	140.748	94.3566	136.751	96.4454	136.58	96.3094	141.155	95.7881	140.395	95.736	146.851	95.5371	158.504	95.1809		139.84	94.4087		136.501	96.3788		140.911	95.7625		146.596	95.3604
140.209	94.45	140.874	94.3541	136.877	96.4443	136.706	96.3086	141.28	95.7878	140.523	95.7355	146.975	95.5367	158.628	95.1797		139.964	94.4067		136.627	96.378		141.035	95.7622		146.726	95.3597
140.333	94.4475	140.996	94.3517	136.996	96.4435	136.829	96.3077	141.406	95.7875	140.645	95.7352	147.096	95.5364	158.753	95.1783		140.086	94.4045		136.751	96.3774		141.155	95.762		146.851	95.359
140.457	94.445	141.125	94.3494	137.126	96.4432	136.957	96.3073	141.531	95.7871	140.768	95.7346	147.222	95.5364	158.875	95.177		140.209	94.4021		136.877	96.3764		141.28	95.7617		146.975	95.3582
140.583	94.4427	141.243	94.3471	137.247	96.442	137.077	96.3069	141.657	95.7868	140.894	95.7341	147.345	95.5363	159.005	95.1756		140.333	94.3996		136.996	96.3756		141.406	95.7613		147.096	95.3573
140.708	94.4403	141.37	94.3449	137.371	96.4409	137.203	96.3062	141.78	95.7869	141.016	95.7335	147.47	95.5362	159.131	95.1743		140.457	94.3972		137.126	96.3753		141.531	95.7609		147.222	95.3567
140.831	94.4378	141.496	94.3424	137.496	96.4401	137.327	96.3056	141.905	95.7868	141.139	95.733	147.592	95.5358	159.255	95.173		140.583	94.3949		137.247	96.3745		141.657	95.7604		147.345	95.356
140.957	94.4355	141.619	94.3399	137.619	96.4391	137.452	96.3051	142.027	95.7869	141.265	95.7324	147.714	95.5358	159.383	95.1717		140.708	94.3926		137.371	96.3736		141.78	95.7602		147.47	95.3553
141.079	94.4334	141.742	94.3376	137.745	96.4382	137.573	96.3045	142.15	95.7866	141.386	95.7318	147.844	95.5357	159.502	95.1703		140.831	94.3901		137.496	96.3728		141.905	95.7599		147.592	95.3544
141.206	94.4314	141.871	94.3352	137.872	96.4371	137.698	96.3041	142.276	95.7863	141.514	95.7315	147.967	95.5353	159.632	95.169		140.957	94.3877		137.619	96.3721		142.027	95.7596		147.714	95.3537
141.329	94.4294	141.993	94.3326	137.995	96.4362	137.821	96.3036	142.403	95.7859	141.638	95.7311	148.089	95.5346	159.76	95.1682		141.079	94.3855		137.745	96.3713		142.15	95.7592		147.844	95.353
141.454	94.4271	142.118	94.3304	138.12	96.4361	137.949	96.303	142.525	95.7857	141.76	95.7311	148.21	95.5345	159.886	95.1672		141.206	94.3833		137.872	96.3706		142.276	95.7589		147.967	95.3521
141.58	94.4252	142.238	94.3282	138.241	96.4357	138.076	96.3023	142.646	95.7853	141.883	95.731	148.334	95.534	160.01	95.1666		141.329	94.381		137.995	96.3699		142.403	95.7585		148.089	95.3514
141.701	94.423	142.366	94.3257	138.368	96.4348	138.199	96.3015	142.77	95.7852	142.008	95.7309	148.461	95.5332	160.139	95.1658		141.454	94.3788		138.12	96.3696		142.525	95.7584		148.21	95.3509
141.824	94.4209	142.49	94.3234	138.495	96.4345	138.323	96.3004	142.896	95.785	142.136	95.7309	148.585	95.5331	160.263	95.165		141.58	94.3767		138.241	96.369		142.646	95.7582		148.334	95.3503
141.946	94.4187	142.613	94.3209	138.62	96.4341	138.448	96.2997	143.014	95.7842	142.258	95.7309	148.706	95.5327	160.387	95.164		141.701	94.3743		138.368	96.3681		142.77	95.7581		148.461	95.3495
142.073	94.4167	142.739	94.3186	138.744	96.4337	138.57	96.2992	143.143	95.7834	142.383	95.7308	148.831	95.5324	160.513	95.1626		141.824	94.3721		138.495	96.3675		142.896	95.758		148.585	95.3491
142.199	94.4148	142.864	94.3164	138.87	96.4336	138.697	96.2982	143.266	95.783	142.505	95.7308	148.955	95.5316	160.637	95.1615		141.946	94.3698		138.62	96.3669		143.014	95.7576		148.706	95.3483
142.322	94.4123	142.991	94.3141	138.99	96.4334	138.823	96.2975	143.392	95.7824	142.631	95.7306	149.08	95.531	160.765	95.1605		142.073	94.3677		138.744	96.3664		143.143	95.7571		148.831	95.3475
142.449	94.41	143.114	94.3116	139.118	96.4335	138.943	96.2966	143.514	95.7819	142.758	95.7304	149.203	95.531	160.891	95.1591		142.199	94.3656		138.87	96.3659		143.266	95.7569		148.955	95.3465
142.573	94.4078	143.233	94.3093	139.24	96.4335	139.071	96.2957	143.641	95.7817	142.881	95.7302	149.326	95.5309	161.017	95.1575		142.322	94.3632		138.99	96.3655		143.392	95.7565		149.08	95.3457
142.698	94.4055	143.365	94.3068	139.367	96.433	139.196	96.2948	143.763	95.7811	143	95.73	149.453	95.5304	161.139	95.1561		142.449	94.3608		139.118	96.365		143.514	95.7562		149.203	95.3451
142.822	94.4031	143.488	94.3041	139.486	96.4323	139.318	96.2939	143.89	95.7808	143.129	95.7297	149.578	95.5299	161.265	95.1548		142.573	94.3586		139.24	96.3646		143.641	95.756		149.326	95.3442
142.947	94.4013	143.611	94.3015	139.612	96.4317	139.441	96.2931	144.011	95.7806	143.256	95.7295	149.7	95.5299	161.394	95.1533		142.698	94.3562		139.367	96.3639		143.763	95.7556		149.453	95.3433
143.063	94.3992	143.737	94.299	139.736	96.4311	139.571	96.2926	144.136	95.7806	143.374	95.7292	149.826	95.5297	161.518	95.1513		142.822	94.3536		139.486	96.3631		143.89	95.7553		149.578	95.3424
143.19	94.3971	143.862	94.2965	139.862	96.4304	139.693	96.292	144.26	95.7806	143.504	95.7291	149.949	95.5291	161.644	95.1498		142.947	94.3514		139.612	96.3624		144.011	95.755		149.7	95.3416
143.313	94.3951	143.985	94.2939	139.988	96.4299	139.817	96.2913	144.385	95.7805	143.625	95.7288	150.07	95.5286	161.766	95.1488		143.063	94.3491		139.736	96.3618		144.136	95.7549		149.826	95.3405
143.439	94.3926	144.112	94.2913	140.113	96.4291	139.938	96.2907	144.509	95.7802	143.749	95.7284	150.194	95.528	161.893	95.1473		143.19	94.3468		139.862	96.3612		144.26	95.7548		149.949	95.3395
143.563	94.3903	144.238	94.2883	140.24	96.4284	140.068	96.29	144.635	95.78	143.874	95.7282	150.32	95.5276	162.018	95.1458		143.313	94.3445		139.988	96.3606		144.385	95.7546		150.07	95.3387
143.692	94.388	144.36	94.2856	140.366	96.4274	140.189	96.2892	144.755	95.7798	143.999	95.7278	150.444	95.5268	162.145	95.1446		143.439	94.3419		140.113	96.3599		144.509	95.7543		150.194	95.3377
143.812	94.3859	144.487	94.2827	140.488	96.4266	140.315	96.2886	144.881	95.7798	144.125	95.7276	150.567	95.526	162.269	95.1434		143.563	94.3393		140.24	96.3592		144.635	95.7541		150.32	95.3367
143.939	94.3839	144.608	94.2802	140.614	96.4261	140.442	96.2883	145.002	95.7799	144.247	95.7273	150.69	95.5253	162.394	95.1419		143.692	94.3368		140.366	96.3583		144.755	95.7538		150.444	95.3357
144.063	94.3818	144.732	94.2775	140.736	96.4253	140.562	96.2877	145.13	95.7795	144.376	95.727	150.813	95.5248	162.521	95.1404		143.812	94.3343		140.488	96.3576		144.881	95.7537		150.567	95.3347
144.184	94.3795	144.859	94.2749	140.861	96.4251	140.686	96.2873	145.255	95.7792	144.499	95.7267	150.937	95.5241	162.643	95.1388		143.939	94.3321		140.614	96.3572		145.002	95.7536		150.69	95.3336
144.311	94.3774	144.982	94.2723	140.986	96.4245	140.815	96.2865	145.378	95.7787	144.623	95.7261	151.061	95.5239	162.772	95.138		144.063	94.3297		140.736	96.3565		145.13	95.7533		150.813	95.3326
144.437	94.375	145.108	94.2695	141.111	96.4246	140.938	96.2856	145.5	95.7781	144.747	95.7255	151.183	95.5239	162.894	95.1367		144.184	94.3272		140.861	96.3562		145.255	95.7529		150.937	95.3315
144.559	94.3725	145.232	94.2668	141.236	96.4244	141.067	96.2848	145.63	95.7774	144.871	95.725	151.308	95.524	163.022	95.1357		144.311	94.3248		140.986	96.3555		145.378	95.7524		151.061	95.331
144.683	94.3704	145.357	94.2643	141.36	96.4241	141.189	96.2841	145.751	95.7768	144.998	95.7245	151.43	95.5237	163.145	95.1345		144.437	94.3223		141.111	96.3551		145.5	95.7518		151.183	95.3303
144.808	94.3682	145.483	94.2618	141.485	96.4236	141.313	96.2833	145.874	95.7761	145.118	95.7242	151.552	95.5234	163.272	95.1335		144.559	94.3196		141.236	96.3546		145.63	95.7512		151.308	95.3298
144.928	94.3659	145.607	94.2593	141.611	96.4232	141.437	96.2822	145.997	95.7755	145.242	95.7238	151.679	95.5231	163.396	95.1326		144.683	94.3173		141.36	96.3541		145.751	95.7507		151.43	95.3291
145.052	94.3633	145.732	94.257	141.732	96.4227	141.562	96.2812	146.125	95.7743	145.368	95.7231	151.801	95.5229	163.525	95.1316		144.808	94.315		141.485	96.3534		145.874	95.7501		151.552	95.3285
145.18	94.3611	145.857	94.2543	141.857	96.4219	141.689	96.2803	146.248	95.7738	145.489	95.7224	151.928	95.5224	163.65	95.1306		144.928	94.3126		141.611	96.3527		145.997	95.7496		151.679	95.3278
145.306	94.3588	145.976	94.2517	141.978	96.4212	141.812	96.2793	146.372	95.7736	145.619	95.7219	152.051	95.5216	163.774	95.1297		145.052	94.3101		141.732	96.352		146.125	95.7487		151.801	95.3273
145.429	94.3562	146.1	94.2492	142.106	96.4204	141.938	96.2782	146.497	95.7731	145.74	95.7213	152.177	95.5211	163.901	95.1288		145.18	94.3077		141.857	96.3511		146.248	95.7481		151.928	95.3265
145.555	94.3538	146.228	94.2467	142.231	96.4197	142.059	96.2772	146.622	95.7729	145.865	95.7208	152.295	95.5205	164.028	95.1275		145.306	94.3052		141.978	96.3503		146.372	95.7477		152.051	95.3256
145.676	94.3515	146.352	94.2442	142.358	96.4186	142.185	96.2766	146.743	95.7729	145.991	95.7204	152.423	95.5194	164.151	95.1263		145.429	94.3027		142.106	96.3493		146.497	95.7472		152.177	95.325
145.803	94.3492	146.477	94.2416	142.483	96.4176	142.311	96.2759	146.865	95.7728	146.11	95.7198	152.548	95.5187	164.28	95.1247		145.555	94.3003		142.231	96.3484		146.622	95.7469		152.295	95.324
145.93	94.3466	146.604	94.2391	142.609	96.4167	142.434	96.2751	146.99	95.7725	146.236	95.7194	152.672	95.5184	164.402	95.1236		145.676	94.2979		142.358	96.3476		146.743	95.7466		152.423	95.3228
146.05	94.3442	146.726	94.2367	142.733	96.4161	142.56	96.2746	147.119	95.7721	146.36	95.719	152.793	95.5181	164.528	95.1219		145.803	94.2954		142.483	96.3467		146.865	95.7463		152.548	95.3217
146.174	94.3416	146.851	94.2342	142.855	96.4154	142.685	96.2742	147.238	95.7721	146.486	95.7186	152.914	95.5177	164.652	95.1206		145.93	94.2928		142.609	96.3459		146.99	95.7459		152.672	95.321
146.3	94.3389	146.972	94.2315	142.978	96.4146	142.808	96.2736	147.366	95.7719	146.611	95.7183	153.039	95.5172	164.779	95.1191		146.05	94.2904		142.733	96.3453		147.119	95.7455		152.793	95.32
146.423	94.336	147.099	94.2289	143.108	96.4137	142.932	96.2728	147.486	95.7715	146.733	95.7181	153.164	95.5167	164.903	95.1174		146.174	94.2879		142.855	96.3448		147.238	95.7453		152.914	95.3192
146.552	94.3333	147.221	94.2263	143.231	96.4131	143.057	96.2719	147.613	95.7711	146.862	95.7177	153.287	95.5164	165.024	95.1155		146.3	94.2852		142.978	96.3441		147.366	95.7451		153.039	95.3181
146.673	94.3308	147.353	94.2236	143.357	96.4124	143.184	96.2708	147.74	95.7708	146.982	95.7173	153.414	95.5159	165.153	95.1141		146.423	94.2825		143.108	96.3433		147.486	95.7448		153.164	95.317
146.794	94.3279	147.471	94.2208	143.479	96.4123	143.308	96.2699	147.861	95.7705	147.106	95.7169	153.535	95.515	165.279	95.1128		146.552	94.2798		143.231	96.3425		147.613	95.7444		153.287	95.3159
146.92	94.3249	147.6	94.2182	143.604	96.4116	143.435	96.2689	147.988	95.77	147.23	95.7166	153.665	95.5148	165.405	95.1112		146.673	94.2772		143.357	96.3416		147.74	95.7441		153.414	95.315
147.046	94.322	147.724	94.2158	143.733	96.4106	143.557	96.2677	148.111	95.7694	147.357	95.7164	153.785	95.5143	165.53	95.1093		146.794	94.2743		143.479	96.3411		147.861	95.7437		153.535	95.3139
147.17	94.3196	147.848	94.2134	143.858	96.4099	143.682	96.2668	148.233	95.769	147.484	95.7161	153.912	95.5134	165.654	95.1072		146.92	94.2715		143.604	96.3402		147.988	95.7433		153.665	95.313
147.294	94.317	147.973	94.2108	143.978	96.4088	143.804	96.2657	148.361	95.7688	147.602	95.7155	154.036	95.5126	165.782	95.1054		147.046	94.2689		143.733	96.3392		148.111	95.7429		153.785	95.3118
147.419	94.3143	148.097	94.2081	144.103	96.408	143.934	96.2643	148.485	95.7683	147.732	95.715	154.159	95.512	165.908	95.1031		147.17	94.2665		143.858	96.3383		148.233	95.7425		153.912	95.3103
147.541	94.3115	148.223	94.2053	144.23	96.4075	144.057	96.2632	148.607	95.7682	147.856	95.7147	154.281	95.5113	166.037	95.1013		147.294	94.2639		143.978	96.3372		148.361	95.7421		154.036	95.309
147.668	94.3091	148.35	94.2027	144.357	96.407	144.182	96.262	148.732	95.7677	147.982	95.7143	154.408	95.5108	166.16	95.0996		147.419	94.2612		144.103	96.3362		148.485	95.7417		154.159	95.3075
147.795	94.3067	148.473	94.2002	144.48	96.4064	144.309	96.2612	148.856	95.7671	148.107	95.7139	154.528	95.5104	166.284	95.0978		147.541	94.2584		144.23	96.3353		148.607	95.7415		154.281	95.3063
147.916	94.3042	148.598	94.1975	144.607	96.4054	144.432	96.2607	148.98	95.7666	148.23	95.7136	154.654	95.51	166.409	95.0957		147.668	94.2559		144.357	96.3345		148.732	95.741		154.408	95.3052
148.042	94.3017	148.719	94.1948	144.728	96.4043	144.556	96.26	149.104	95.7658	148.353	95.7133	154.779	95.5093	166.534	95.0936		147.795	94.2534		144.48	96.3338		148.856	95.7405		154.528	95.3041
148.164	94.2992	148.846	94.192	144.854	96.4036	144.687	96.2591	149.226	95.7653	148.478	95.713	154.91	95.5083	166.658	95.0919		147.916	94.2509		144.607	96.3331		148.98	95.7401		154.654	95.3028
148.29	94.2967	148.971	94.1888	144.978	96.4032	144.81	96.2584	149.353	95.7648	148.601	95.7125	155.024	95.5078	166.783	95.0901		148.042	94.2483		144.728	96.3322		149.104	95.7395		154.779	95.3015
148.415	94.2943	149.095	94.1857	145.105	96.4027	144.932	96.2573	149.479	95.7643	148.727	95.7122	155.149	95.5073	166.907	95.0887		148.164	94.2456		144.854	96.3313		149.226	95.7391		154.91	95.3001
148.54	94.2916	149.218	94.1826	145.228	96.4022	145.059	96.2561	149.601	95.7638	148.848	95.712	155.272	95.5068	167.033	95.0873		148.29	94.2428		144.978	96.3308		149.353	95.7387		155.024	95.2989
148.661	94.289	149.343	94.1796	145.357	96.4014	145.183	96.2553	149.725	95.7631	148.978	95.7114	155.399	95.5061	167.158	95.0857		148.415	94.24		145.105	96.33		149.479	95.7382		155.149	95.298
148.786	94.2865	149.469	94.1767	145.48	96.4004	145.305	96.2545	149.847	95.7626	149.098	95.711	155.523	95.5053	167.282	95.0839		148.54	94.2371		145.228	96.3291		149.601	95.7379		155.272	95.2971
148.91	94.2837	149.595	94.1738	145.604	96.3994	145.431	96.2539	149.973	95.762	149.223	95.7106	155.65	95.5048	167.408	95.0824		148.661	94.2343		145.357	96.3284		149.725	95.7373		155.399	95.2959
149.034	94.2809	149.718	94.1706	145.729	96.3985	145.559	96.253	150.101	95.7615	149.347	95.7099	155.769	95.5044	167.534	95.081		148.786	94.2316		145.48	96.3275		149.847	95.7368		155.523	95.2946
149.161	94.278	149.845	94.1676	145.86	96.3976	145.682	96.252	150.223	95.7609	149.474	95.7093	155.895	95.5041	167.658	95.0799		148.91	94.2287		145.604	96.3267		149.973	95.7363		155.65	95.2936
149.28	94.2753	149.963	94.1647	145.979	96.3966	145.807	96.251	150.348	95.7606	149.596	95.7088	156.019	95.5041	167.784	95.0784		149.034	94.2258		145.729	96.3258		150.101	95.7357		155.769	95.2927
149.403	94.2728	150.097	94.1616	146.107	96.395	145.933	96.2502	150.471	95.7599	149.719	95.7082	156.146	95.5038	167.91	95.0769		149.161	94.2228		145.86	96.3248		150.223	95.7351		155.895	95.292
149.532	94.2703	150.216	94.1586	146.233	96.3931	146.054	96.2493	150.598	95.7593	149.843	95.7076	156.266	95.5031	168.04	95.0754		149.28	94.22		145.979	96.3238		150.348	95.7347		156.019	95.2913
149.657	94.2672	150.344	94.1556	146.359	96.3914	146.179	96.2485	150.72	95.7589	149.968	95.7071	156.397	95.5023	168.163	95.0738		149.403	94.2172		146.107	96.3226		150.471	95.734		156.146	95.2903
149.779	94.2645	150.465	94.1525	146.482	96.3901	146.304	96.248	150.844	95.7584	150.093	95.7066	156.519	95.5015	168.286	95.072		149.532	94.2145		146.233	96.3212		150.598	95.7335		156.266	95.2893
149.906	94.2617	150.593	94.1493	146.61	96.3887	146.43	96.247	150.97	95.7582	150.226	95.7062	156.646	95.5009	168.411	95.0704		149.657	94.2114		146.359	96.32		150.72	95.733		156.397	95.288
150.031	94.2588	150.716	94.1461	146.735	96.387	146.557	96.246	151.096	95.7579	150.341	95.7056	156.767	95.5004	168.536	95.0689		149.779	94.2085		146.482	96.3191		150.844	95.7325		156.519	95.2867
150.157	94.2562	150.839	94.1428	146.86	96.3854	146.681	96.2448	151.218	95.7576	150.461	95.7048	156.892	95.4998	168.658	95.0668		149.906	94.2055		146.61	96.3179		150.97	95.7322		156.646	95.2856
150.282	94.2534	150.965	94.1396	146.982	96.3839	146.804	96.2437	151.344	95.7573	150.593	95.7043	157.012	95.4988	168.788	95.0647		150.031	94.2025		146.735	96.3165		151.096	95.7317		156.767	95.2846
150.41	94.2508	151.094	94.1365	147.108	96.3825	146.928	96.243	151.468	95.7566	150.718	95.7039	157.139	95.4977	168.911	95.0627		150.157	94.1995		146.86	96.3151		151.218	95.7312		156.892	95.2833
150.532	94.248	151.214	94.1332	147.231	96.3816	147.058	96.242	151.591	95.7559	150.841	95.7035	157.263	95.4964	169.036	95.0607		150.282	94.1965		146.982	96.3138		151.344	95.7308		157.012	95.2817
150.657	94.245	151.341	94.1302	147.359	96.3817	147.184	96.2409	151.712	95.7556	150.968	95.7031	157.389	95.4955	169.161	95.0585		150.41	94.1937		147.108	96.3127		151.468	95.7303		157.139	95.2802
150.78	94.2418	151.462	94.127	147.482	96.3817	147.303	96.2398	151.843	95.7553	151.093	95.7026	157.517	95.4952	169.287	95.0567		150.532	94.1906		147.231	96.3118		151.591	95.7297		157.263	95.2786
150.903	94.2394	151.59	94.1236	147.613	96.3815	147.431	96.2387	151.965	95.7549	151.218	95.7019	157.639	95.4947	169.41	95.0547		150.657	94.1876		147.359	96.3114		151.712	95.7293		157.389	95.2771
151.028	94.2365	151.711	94.1206	147.735	96.3816	147.554	96.2374	152.09	95.7543	151.343	95.7013	157.764	95.4944	169.538	95.0528		150.78	94.1844		147.482	96.3107		151.843	95.729		157.517	95.276
151.153	94.234	151.842	94.1176	147.861	96.3813	147.681	96.2361	152.212	95.7534	151.469	95.7009	157.885	95.4937	169.659	95.051		150.903	94.1815		147.613	96.3101		151.965	95.7284		157.639	95.2747
151.277	94.2311	151.962	94.1144	147.984	96.3817	147.806	96.2352	152.336	95.7525	151.591	95.7004	158.013	95.4932	169.783	95.0492		151.028	94.1786		147.735	96.3095		152.09	95.7278		157.764	95.2736
151.403	94.2283	152.092	94.1114	148.111	96.3816	147.93	96.2339	152.459	95.7516	151.715	95.7001	158.137	95.4923	169.912	95.0477		151.153	94.1758		147.861	96.3087		152.212	95.7272		157.885	95.2723
151.527	94.2257	152.214	94.1084	148.235	96.3815	148.054	96.2327	152.59	95.7511	151.839	95.6998	158.26	95.4919	170.037	95.0462		151.277	94.1728		147.984	96.3085		152.336	95.7265		158.013	95.2712
151.652	94.2227	152.343	94.1052	148.361	96.3816	148.179	96.2314	152.71	95.7508	151.964	95.6993	158.387	95.491	170.157	95.0441		151.403	94.1699		148.111	96.3077		152.459	95.7258		158.137	95.27
151.774	94.2197	152.465	94.102	148.485	96.3808	148.304	96.2303	152.833	95.7505	152.088	95.6987	158.509	95.49	170.286	95.0422		151.527	94.167		148.235	96.3071		152.59	95.7254		158.26	95.269
151.899	94.2169	152.587	94.0987	148.61	96.3795	148.432	96.229	152.962	95.7502	152.211	95.698	158.636	95.4893	170.409	95.0408		151.652	94.1639		148.361	96.3065		152.71	95.7251		158.387	95.2675
152.022	94.2141	152.715	94.0956	148.733	96.3786	148.557	96.2276	153.084	95.7498	152.333	95.6975	158.761	95.4883	170.534	95.039		151.774	94.1609		148.485	96.3055		152.833	95.7246		158.509	95.2661
152.147	94.211	152.841	94.0926	148.86	96.3771	148.68	96.2263	153.206	95.7496	152.46	95.697	158.884	95.4877	170.657	95.037		151.899	94.1578		148.61	96.3042		152.962	95.7241		158.636	95.2651
152.272	94.2078	152.961	94.0893	148.982	96.3754	148.811	96.2254	153.334	95.7492	152.584	95.6964	159.007	95.4867	170.782	95.0352		152.022	94.1548		148.733	96.3031		153.084	95.7236		158.761	95.2637
152.398	94.2047	153.089	94.0862	149.111	96.3741	148.933	96.2245	153.456	95.7487	152.71	95.6958	159.135	95.4861	170.907	95.0331		152.147	94.1518		148.86	96.3017		153.206	95.7233		158.884	95.2623
152.523	94.2014	153.213	94.0829	149.236	96.3726	149.058	96.2232	153.583	95.7482	152.834	95.6952	159.256	95.4851	171.032	95.0311		152.272	94.1486		148.982	96.3004		153.334	95.7228		159.007	95.261
152.647	94.198	153.337	94.0796	149.362	96.3713	149.18	96.2222	153.707	95.7482	152.956	95.6946	159.382	95.4846	171.157	95.029		152.398	94.1454		149.111	96.2993		153.456	95.7222		159.135	95.2596
152.772	94.1946	153.461	94.0763	149.488	96.37	149.309	96.2211	153.833	95.7476	153.083	95.694	159.51	95.4839	171.283	95.027		152.523	94.1422		149.236	96.2979		153.583	95.7217		159.256	95.2581
152.898	94.191	153.588	94.0729	149.612	96.3683	149.433	96.2197	153.956	95.747	153.208	95.6932	159.635	95.4836	171.41	95.0251		152.647	94.1388		149.362	96.2967		153.707	95.7214		159.382	95.2568
153.02	94.188	153.711	94.0698	149.737	96.3671	149.56	96.2184	154.08	95.7462	153.334	95.6924	159.757	95.4834	171.532	95.0231		152.772	94.1354		149.488	96.2955		153.833	95.7208		159.51	95.2554
153.144	94.1848	153.84	94.0666	149.864	96.366	149.686	96.2173	154.205	95.7453	153.457	95.6919	159.883	95.4827	171.658	95.0211		152.898	94.1319		149.612	96.294		153.956	95.7201		159.635	95.2543
153.266	94.1816	153.964	94.0634	149.99	96.3648	149.809	96.2163	154.328	95.7445	153.58	95.6913	160.008	95.4819	171.785	95.0187		153.02	94.1289		149.737	96.2927		154.08	95.7193		159.757	95.2533
153.395	94.1782	154.091	94.0602	150.116	96.364	149.935	96.2151	154.455	95.7435	153.705	95.6907	160.131	95.4809	171.905	95.0164		153.144	94.1257		149.864	96.2916		154.205	95.7186		159.883	95.2519
153.518	94.1747	154.213	94.0572	150.243	96.3629	150.062	96.2135	154.582	95.7429	153.832	95.6901	160.254	95.4804	172.029	95.0144		153.266	94.1225		149.99	96.2905		154.328	95.7179		160.008	95.2503
153.64	94.1714	154.334	94.0539	150.365	96.3619	150.189	96.2121	154.706	95.7422	153.957	95.6897	160.382	95.4793	172.159	95.0121		153.395	94.1192		150.116	96.2895		154.455	95.7171		160.131	95.2487
153.77	94.1686	154.462	94.0507	150.493	96.3606	150.31	96.2107	154.827	95.7416	154.083	95.689	160.507	95.4782	172.28	95.01		153.518	94.116		150.243	96.2882		154.582	95.7165		160.254	95.2474
153.896	94.1656	154.588	94.0477	150.619	96.3593	150.439	96.2093	154.95	95.7408	154.21	95.6884	160.635	95.4771	172.404	95.0077		153.64	94.1126		150.365	96.287		154.706	95.716		160.382	95.2457
154.02	94.1627	154.71	94.0445	150.74	96.3578	150.564	96.208	155.077	95.7401	154.331	95.6877	160.758	95.4759	172.529	95.0051		153.77	94.1096		150.493	96.2856		154.827	95.7153		160.507	95.2441
154.142	94.1599	154.839	94.0412	150.866	96.3567	150.69	96.2068	155.202	95.7394	154.458	95.6873	160.877	95.4746	172.652	95.003		153.896	94.1066		150.619	96.2843		154.95	95.7146		160.635	95.2424
154.267	94.1566	154.958	94.0378	150.993	96.3556	150.814	96.2056	155.327	95.7387	154.579	95.6869	161.001	95.4735	172.779	95.0008		154.02	94.1036		150.74	96.2829		155.077	95.7139		160.758	95.2405
154.392	94.1532	155.09	94.0345	151.12	96.3545	150.94	96.2042	155.453	95.738	154.706	95.6863	161.129	95.4727	172.904	94.9982		154.142	94.1006		150.866	96.2818		155.202	95.7133		160.877	95.2388
154.514	94.1499	155.211	94.0312	151.244	96.3535	151.06	96.2028	155.58	95.7372	154.83	95.6856	161.25	95.4717	173.031	94.9966		154.267	94.0972		150.993	96.2806		155.327	95.7128		161.001	95.2371
154.64	94.1467	155.339	94.0275	151.369	96.3525	151.188	96.2014	155.701	95.7365	154.956	95.6848	161.377	95.4706	173.153	94.9949		154.392	94.0939		151.12	96.2794		155.453	95.7121		161.129	95.2354
154.765	94.1437	155.461	94.0239	151.491	96.3516	151.316	96.2001	155.825	95.7358	155.08	95.6839	161.498	95.4691	173.28	94.9929		154.514	94.0905		151.244	96.2782		155.58	95.7114		161.25	95.2341
154.887	94.1403	155.589	94.0204	151.617	96.3507	151.437	96.1988	155.95	95.7352	155.202	95.683	161.624	95.4682	173.402	94.9913		154.64	94.0871		151.369	96.2769		155.701	95.7106		161.377	95.2327
155.014	94.1368	155.71	94.0169	151.743	96.3502	151.564	96.1977	156.074	95.7343	155.328	95.6823	161.746	95.4676	173.526	94.9892		154.765	94.0838		151.491	96.2759		155.825	95.7098		161.498	95.231
155.139	94.1332	155.838	94.0132	151.869	96.3495	151.689	96.1966	156.2	95.7335	155.452	95.6816	161.872	95.4668	173.649	94.9872		154.887	94.0804		151.617	96.2747		155.95	95.7091		161.624	95.2297
155.263	94.1295	155.966	94.0097	151.992	96.3484	151.814	96.1951	156.322	95.7327	155.578	95.681	161.994	95.4661	173.777	94.9855		155.014	94.0769		151.743	96.274		156.074	95.7083		161.746	95.2284
155.39	94.126	156.089	94.0061	152.118	96.3476	151.941	96.1939	156.449	95.7319	155.706	95.6802	162.121	95.4653	173.903	94.9836		155.139	94.0732		151.869	96.273		156.2	95.7076		161.872	95.227
155.515	94.1227	156.215	94.0025	152.243	96.3466	152.066	96.1925	156.57	95.731	155.826	95.6794	162.246	95.4643	174.025	94.9818		155.263	94.0696		151.992	96.2718		156.322	95.7069		161.994	95.2258
155.638	94.1197	156.34	93.9989	152.37	96.3455	152.195	96.191	156.691	95.7302	155.951	95.6785	162.371	95.4636	174.149	94.9798		155.39	94.0661		152.118	96.2707		156.449	95.7061		162.121	95.2244
155.766	94.1163	156.463	93.9954	152.494	96.3441	152.317	96.1894	156.819	95.7293	156.078	95.6779	162.494	95.4628	174.274	94.9775		155.515	94.0626		152.243	96.2695		156.57	95.7052		162.246	95.223
155.891	94.1129	156.591	93.9918	152.618	96.3424	152.442	96.1881	156.944	95.7284	156.202	95.6771	162.619	95.462	174.4	94.9751		155.638	94.0593		152.37	96.2682		156.691	95.7044		162.371	95.2217
156.012	94.1096	156.711	93.988	152.744	96.3407	152.566	96.1869	157.068	95.7278	156.327	95.6764	162.741	95.4612	174.523	94.9728		155.766	94.0559		152.494	96.2668		156.819	95.7036		162.494	95.2201
156.137	94.1065	156.84	93.9845	152.868	96.3389	152.693	96.1856	157.196	95.7273	156.454	95.6758	162.867	95.4603	174.652	94.9704		155.891	94.0523		152.618	96.2653		156.944	95.7028		162.619	95.2186
156.26	94.1034	156.964	93.9808	152.993	96.337	152.82	96.184	157.318	95.7266	156.576	95.6751	162.995	95.459	174.776	94.9685		156.012	94.0488		152.744	96.2638		157.068	95.7021		162.741	95.217
156.388	94.1003	157.089	93.9774	153.119	96.3353	152.944	96.1822	157.439	95.7257	156.701	95.674	163.115	95.458	174.898	94.9667		156.137	94.0455		152.868	96.2622		157.196	95.7015		162.867	95.2153
156.509	94.0973	157.212	93.9736	153.245	96.3343	153.073	96.1808	157.565	95.7247	156.825	95.6729	163.242	95.4567	175.022	94.9646		156.26	94.0421		152.993	96.2605		157.318	95.7009		162.995	95.2138
156.635	94.094	157.339	93.9699	153.37	96.3329	153.2	96.1792	157.688	95.7239	156.95	95.6719	163.362	95.4556	175.147	94.9622		156.388	94.0388		153.119	96.2588		157.439	95.6998		163.115	95.2123
156.762	94.0907	157.464	93.9663	153.498	96.3317	153.321	96.1778	157.814	95.7234	157.07	95.6711	163.491	95.4545	175.27	94.9601		156.509	94.0354		153.245	96.2575		157.565	95.6988		163.242	95.2107
156.885	94.0869	157.588	93.9627	153.625	96.3304	153.449	96.1764	157.939	95.7226	157.196	95.6704	163.613	95.453	175.395	94.9582		156.635	94.032		153.37	96.2561		157.688	95.6979		163.362	95.2089
157.011	94.0834	157.71	93.9589	153.748	96.3287	153.573	96.1752	158.062	95.722	157.319	95.6695	163.735	95.452	175.524	94.9557		156.762	94.0285		153.498	96.2547		157.814	95.6973		163.491	95.2073
157.136	94.0801	157.838	93.9554	153.873	96.3277	153.694	96.1738	158.189	95.7213	157.443	95.6688	163.863	95.4511	175.646	94.9534		156.885	94.0248		153.625	96.2534		157.939	95.6965		163.613	95.2056
157.26	94.0767	157.962	93.9519	153.999	96.3266	153.822	96.1724	158.312	95.7201	157.57	95.6682	163.989	95.4504	175.769	94.9508		157.011	94.0212		153.748	96.2519		158.062	95.6957		163.735	95.2039
157.387	94.0731	158.086	93.9484	154.124	96.3253	153.949	96.1711	158.438	95.7192	157.693	95.6674	164.113	95.4494	175.893	94.9485		157.136	94.0178		153.873	96.2507		158.189	95.6951		163.863	95.2023
157.511	94.0695	158.213	93.945	154.248	96.324	154.071	96.1697	158.562	95.7184	157.819	95.6665	164.238	95.4487	176.02	94.9458		157.26	94.0143		153.999	96.2495		158.312	95.6942		163.989	95.2006
157.635	94.0656	158.339	93.9414	154.372	96.3228	154.197	96.1687	158.684	95.7181	157.945	95.666	164.362	95.4476	176.145	94.9429		157.387	94.0107		154.124	96.2482		158.438	95.6933		164.113	95.1989
157.763	94.062	158.464	93.9378	154.499	96.3213	154.324	96.1676	158.81	95.7174	158.072	95.6655	164.485	95.4468	176.268	94.9401		157.511	94.0072		154.248	96.2469		158.562	95.6925		164.238	95.1972
157.885	94.0583	158.586	93.9343	154.621	96.3202	154.447	96.1663	158.935	95.7163	158.198	95.6651	164.608	95.4458	176.391	94.9376		157.635	94.0035		154.372	96.2458		158.684	95.692		164.362	95.1953
158.013	94.0544	158.711	93.9308	154.753	96.3186	154.575	96.1647	159.06	95.7154	158.32	95.6643	164.734	95.4447	176.517	94.9349		157.763	93.9999		154.499	96.2445		158.81	95.6914		164.485	95.1934
158.138	94.0504	158.838	93.9269	154.876	96.3168	154.698	96.1632	159.185	95.715	158.443	95.6635	164.859	95.4438	176.639	94.9319		157.885	93.9963		154.621	96.2432		158.935	95.6907		164.608	95.1917
158.263	94.0467	158.964	93.9234	155.001	96.3156	154.826	96.1618	159.308	95.7141	158.567	95.6627	164.983	95.4427	176.764	94.9294		158.013	93.9926		154.753	96.2416		159.06	95.6898		164.734	95.1898
158.387	94.0428	159.091	93.9197	155.126	96.3143	154.952	96.1603	159.432	95.7132	158.694	95.6619	165.111	95.4414	176.887	94.9266		158.138	93.9887		154.876	96.24		159.185	95.6892		164.859	95.1879
158.509	94.0388	159.218	93.916	155.253	96.3127	155.077	96.1586	159.556	95.7121	158.818	95.6609	165.234	95.4401	177.012	94.9241		158.263	93.9851		155.001	96.2387		159.308	95.6884		164.983	95.1861
158.633	94.035	159.342	93.9123	155.378	96.3113	155.202	96.1571	159.679	95.7111	158.94	95.6601	165.365	95.4391	177.138	94.9213		158.387	93.9812		155.126	96.2373		159.432	95.6876		165.111	95.184
158.759	94.0312	159.463	93.9084	155.506	96.3098	155.33	96.1557	159.809	95.7098	159.068	95.6592	165.486	95.4378	177.263	94.9186		158.509	93.9774		155.253	96.2357		159.556	95.6865		165.234	95.1821
158.887	94.0277	159.589	93.9047	155.631	96.3084	155.453	96.1541	159.933	95.7084	159.197	95.6583	165.61	95.4367	177.389	94.9161		158.633	93.9736		155.378	96.2342		159.679	95.6856		165.365	95.1802
159.009	94.0241	159.712	93.9008	155.757	96.3068	155.578	96.1524	160.058	95.7076	159.318	95.6574	165.736	95.4353	177.511	94.9137		158.759	93.9698		155.506	96.2327		159.809	95.6845		165.486	95.1782
159.132	94.0203	159.84	93.897	155.881	96.3049	155.704	96.1505	160.186	95.707	159.442	95.6562	165.86	95.4343	177.634	94.9113		158.887	93.9662		155.631	96.2312		159.933	95.6834		165.61	95.1764
159.262	94.0167	159.962	93.8932	156.005	96.3034	155.831	96.1487	160.306	95.706	159.566	95.655	165.984	95.4332	177.759	94.9085		159.009	93.9624		155.757	96.2296		160.058	95.6825		165.736	95.1745
159.386	94.0138	160.092	93.8896	156.131	96.3019	155.957	96.147	160.434	95.7049	159.691	95.6541	166.108	95.4321	177.886	94.906		159.132	93.9587		155.881	96.2277		160.186	95.6816		165.86	95.1728
159.512	94.0106	160.218	93.8858	156.256	96.3001	156.081	96.1451	160.558	95.704	159.818	95.6532	166.231	95.431	178.009	94.9035		159.262	93.9549		156.005	96.226		160.306	95.6805		165.984	95.1709
159.635	94.0071	160.342	93.8819	156.38	96.2989	156.204	96.1433	160.68	95.7033	159.941	95.6522	166.355	95.43	178.133	94.9013		159.386	93.9517		156.131	96.2244		160.434	95.6795		166.108	95.169
159.756	94.0038	160.466	93.8781	156.508	96.2973	156.331	96.1419	160.805	95.7026	160.07	95.6513	166.48	95.4288	178.26	94.899		159.512	93.9482		156.256	96.2226		160.558	95.6786		166.231	95.1673
159.881	94.0004	160.592	93.8743	156.632	96.296	156.457	96.1402	160.931	95.7015	160.191	95.6504	166.604	95.4273	178.381	94.8961		159.635	93.9445		156.38	96.2211		160.68	95.6777		166.355	95.1657
160.008	93.9969	160.716	93.8706	156.756	96.2947	156.579	96.1385	161.057	95.7007	160.314	95.6495	166.731	95.426	178.506	94.8934		159.756	93.9409		156.508	96.2196		160.805	95.677		166.48	95.1639
160.135	93.9934	160.841	93.8667	156.886	96.2932	156.706	96.1367	161.181	95.7	160.439	95.6484	166.856	95.4246	178.634	94.891		159.881	93.9374		156.632	96.2181		160.931	95.6759		166.604	95.1617
160.258	93.9899	160.966	93.8629	157.01	96.2913	156.833	96.135	161.303	95.699	160.564	95.6475	166.977	95.4232	178.757	94.8884		160.008	93.9337		156.756	96.2166		161.057	95.6751		166.731	95.1597
160.385	93.9865	161.094	93.8591	157.136	96.2896	156.955	96.1334	161.428	95.6981	160.69	95.6468	167.105	95.4219	178.881	94.8857		160.135	93.93		156.886	96.215		161.181	95.6742		166.856	95.1578
160.506	93.9831	161.219	93.8554	157.26	96.2878	157.082	96.1318	161.553	95.6969	160.814	95.6461	167.227	95.4207	179.004	94.8829		160.258	93.9264		157.01	96.2132		161.303	95.6733		166.977	95.1558
160.632	93.979	161.34	93.8516	157.385	96.2862	157.208	96.13	161.675	95.6958	160.94	95.6452	167.354	95.4194	179.128	94.8798		160.385	93.9228		157.136	96.2115		161.428	95.6724		167.105	95.1538
160.758	93.9748	161.468	93.8477	157.511	96.2847	157.334	96.1283	161.801	95.6949	161.06	95.6443	167.478	95.4183	179.253	94.8765		160.506	93.9192		157.26	96.2098		161.553	95.6715		167.227	95.1518
160.882	93.9711	161.594	93.8439	157.636	96.2827	157.46	96.1265	161.926	95.6938	161.185	95.6434	167.603	95.417	179.377	94.8733		160.632	93.9153		157.385	96.2081		161.675	95.6705		167.354	95.1496
161.006	93.9675	161.716	93.8402	157.763	96.2813	157.585	96.1246	162.051	95.6931	161.311	95.6423	167.725	95.4158	179.502	94.8703		160.758	93.9112		157.511	96.2065		161.801	95.6696		167.478	95.1474
161.13	93.9636	161.843	93.8363	157.89	96.2796	157.711	96.123	162.173	95.6921	161.439	95.6411	167.855	95.4146	179.628	94.8674		160.882	93.9075		157.636	96.2046		161.926	95.6686		167.603	95.1452
161.256	93.9597	161.968	93.8322	158.007	96.2777	157.835	96.1214	162.299	95.6911	161.561	95.64	167.978	95.4134	179.748	94.8644		161.006	93.9038		157.763	96.203		162.051	95.6677		167.725	95.1431
161.38	93.9557	162.093	93.8284	158.136	96.2759	157.96	96.1195	162.424	95.6901	161.687	95.6391	168.101	95.4123	179.878	94.8613		161.13	93.8999		157.89	96.2013		162.173	95.6666		167.855	95.141
161.503	93.9513	162.217	93.8248	158.262	96.2743	158.083	96.1179	162.552	95.689	161.811	95.6378	168.226	95.4109	179.999	94.8581		161.256	93.896		158.007	96.1996		162.299	95.6655		167.978	95.1389
161.63	93.9473	162.345	93.8209	158.386	96.273	158.21	96.1164	162.678	95.6881	161.937	95.6368	168.348	95.4096	180.124	94.8548		161.38	93.8921		158.136	96.1977		162.424	95.6646		168.101	95.1368
161.753	93.9435	162.468	93.8169	158.515	96.2716	158.337	96.1149	162.8	95.6873	162.062	95.6358	168.472	95.4079	180.248	94.8517		161.503	93.888		158.262	96.1961		162.552	95.6634		168.226	95.1345
161.877	93.9397	162.596	93.8131	158.637	96.2701	158.467	96.1136	162.923	95.6862	162.185	95.6347	168.599	95.4062	180.374	94.8491		161.63	93.8841		158.386	96.1947		162.678	95.6624		168.348	95.1322
161.999	93.9361	162.717	93.8092	158.764	96.2686	158.588	96.1121	163.052	95.6853	162.311	95.6336	168.725	95.4044	180.496	94.8468		161.753	93.8802		158.515	96.1932		162.8	95.6615		168.472	95.1298
162.126	93.9323	162.847	93.8053	158.89	96.2668	158.714	96.1105	163.176	95.6844	162.434	95.6327	168.85	95.4028	180.622	94.8441		161.877	93.8764		158.637	96.1919		162.923	95.6604		168.599	95.1277
162.25	93.9287	162.971	93.8013	159.015	96.2649	158.839	96.1089	163.296	95.683	162.558	95.6317	168.974	95.4009	180.745	94.8412		161.999	93.8726		158.764	96.1903		163.052	95.6595		168.725	95.1256
162.375	93.925	163.095	93.7974	159.141	96.2637	158.967	96.1071	163.42	95.6818	162.683	95.6305	169.099	95.3996	180.865	94.8386		162.126	93.8688		158.89	96.1886		163.176	95.6585		168.85	95.1235
162.499	93.9213	163.219	93.7934	159.266	96.262	159.088	96.105	163.542	95.6808	162.809	95.6294	169.223	95.3984	180.991	94.836		162.25	93.865		159.015	96.1869		163.296	95.6573		168.974	95.1211
162.627	93.9173	163.345	93.7892	159.391	96.2603	159.215	96.1034	163.671	95.6793	162.931	95.6283	169.349	95.397	181.119	94.8336		162.375	93.8612		159.141	96.1854		163.42	95.6562		169.099	95.1191
162.753	93.9138	163.469	93.785	159.516	96.2588	159.342	96.1015	163.789	95.6777	163.055	95.6274	169.474	95.3959	181.245	94.8309		162.499	93.8573		159.266	96.1835		163.542	95.6551		169.223	95.1172
162.878	93.9102	163.597	93.7809	159.642	96.2574	159.466	96.0997	163.916	95.6763	163.185	95.6262	169.598	95.3943	181.366	94.8284		162.627	93.8533		159.391	96.1819		163.671	95.6538		169.349	95.1153
163.003	93.9066	163.721	93.777	159.767	96.2557	159.591	96.0979	164.039	95.6748	163.306	95.625	169.72	95.3929	181.489	94.8257		162.753	93.8494		159.516	96.1802		163.789	95.6526		169.474	95.1134
163.128	93.9028	163.844	93.7729	159.889	96.254	159.718	96.0961	164.162	95.6735	163.427	95.6237	169.844	95.3915	181.617	94.8231		162.878	93.8456		159.642	96.1785		163.916	95.6512		169.598	95.1114
163.252	93.8993	163.969	93.769	160.018	96.2529	159.845	96.0944	164.288	95.672	163.554	95.6223	169.974	95.39	181.741	94.8202		163.003	93.8418		159.767	96.1768		164.039	95.6499		169.72	95.1093
163.377	93.8956	164.095	93.7649	160.138	96.2516	159.971	96.0929	164.414	95.6706	163.681	95.6209	170.095	95.3883	181.866	94.8171		163.128	93.8379		159.889	96.1751		164.162	95.6486		169.844	95.1073
163.501	93.8914	164.22	93.7609	160.269	96.2498	160.095	96.0911	164.536	95.6693	163.805	95.6198	170.22	95.3872	181.988	94.8145		163.252	93.8341		160.018	96.1736		164.288	95.6471		169.974	95.1051
163.623	93.8874	164.344	93.7567	160.396	96.2475	160.221	96.0892	164.664	95.668	163.933	95.6189	170.345	95.3855	182.113	94.8116		163.377	93.8303		160.138	96.1722		164.414	95.6457		170.095	95.1027
163.751	93.8832	164.469	93.7529	160.524	96.2454	160.345	96.0873	164.788	95.6666	164.052	95.618	170.469	95.3837	182.237	94.8083		163.501	93.8261		160.269	96.1705		164.536	95.6445		170.22	95.1008
163.875	93.8794	164.594	93.7488	160.649	96.2436	160.472	96.0851	164.912	95.6654	164.177	95.617	170.594	95.382	182.36	94.8052		163.623	93.8221		160.396	96.1683		164.664	95.6435		170.345	95.0986
164.002	93.8752	164.717	93.7447	160.773	96.242	160.594	96.0832	165.039	95.6643	164.3	95.6157	170.717	95.3803	182.486	94.8026		163.751	93.818		160.524	96.1664		164.788	95.6423		170.469	95.096
164.125	93.871	164.843	93.7407	160.896	96.24	160.722	96.0811	165.163	95.6632	164.426	95.6147	170.844	95.3791	182.608	94.7998		163.875	93.8141		160.649	96.1644		164.912	95.6412		170.594	95.0936
164.251	93.8666	164.968	93.7366	161.025	96.2378	160.849	96.0788	165.285	95.6623	164.549	95.6137	170.967	95.3774	182.734	94.797		164.002	93.81		160.773	96.1626		165.039	95.64		170.717	95.0914
164.376	93.8626	165.097	93.7325	161.146	96.2358	160.971	96.077	165.41	95.6613	164.673	95.6128	171.09	95.3757	182.856	94.7936		164.125	93.8059		160.896	96.1606		165.163	95.639		170.844	95.0894
164.5	93.858	165.218	93.7285	161.273	96.2332	161.1	96.075	165.533	95.6601	164.802	95.6121	171.216	95.3743	182.978	94.7902		164.251	93.8016		161.025	96.1583		165.285	95.638		170.967	95.0872
164.625	93.8533	165.35	93.7245	161.395	96.2305	161.223	96.0728	165.657	95.6589	164.928	95.6112	171.34	95.3728	183.105	94.7869		164.376	93.7975		161.146	96.1564		165.41	95.637		171.09	95.0846
164.75	93.8488	165.47	93.7205	161.522	96.2284	161.347	96.0707	165.786	95.6577	165.052	95.6102	171.464	95.3711	183.226	94.7833		164.5	93.7932		161.273	96.1541		165.533	95.6361		171.216	95.0823
164.875	93.8448	165.598	93.7165	161.647	96.2263	161.469	96.0682	165.909	95.6568	165.175	95.6089	171.589	95.3695	183.355	94.7799		164.625	93.7889		161.395	96.1517		165.657	95.635		171.34	95.0798
165	93.841	165.721	93.7124	161.776	96.224	161.601	96.0656	166.035	95.6556	165.297	95.6076	171.711	95.3679	183.478	94.777		164.75	93.7846		161.522	96.1496		165.786	95.6339		171.464	95.0772
165.124	93.837	165.844	93.7086	161.902	96.222	161.725	96.0637	166.16	95.6543	165.426	95.6061	171.837	95.3664	183.601	94.7732		164.875	93.7807		161.647	96.1473		165.909	95.6328		171.589	95.0747
165.25	93.8331	165.975	93.7045	162.024	96.2194	161.852	96.0613	166.282	95.6532	165.549	95.6046	171.965	95.3644	183.726	94.7694		165	93.7767		161.776	96.1448		166.035	95.6316		171.711	95.0725
165.375	93.8295	166.097	93.7004	162.148	96.2168	161.977	96.0593	166.41	95.6516	165.672	95.6032	172.089	95.3623	183.855	94.7657		165.124	93.7728		161.902	96.1428		166.16	95.6302		171.837	95.0698
165.499	93.8256	166.221	93.6962	162.276	96.2151	162.103	96.0569	166.532	95.65	165.794	95.6018	172.214	95.3606	183.979	94.7622		165.25	93.7688		162.024	96.1404		166.282	95.6289		171.965	95.0669
165.625	93.8218	166.347	93.692	162.401	96.2126	162.226	96.0543	166.658	95.6484	165.918	95.6002	172.34	95.3588	184.1	94.7588		165.375	93.7649		162.148	96.1381		166.41	95.6274		172.089	95.064
165.745	93.8178	166.471	93.6879	162.524	96.2103	162.352	96.052	166.782	95.647	166.044	95.5986	172.465	95.3568	184.225	94.7554		165.499	93.7609		162.276	96.136		166.532	95.6259		172.214	95.0614
165.876	93.8142	166.594	93.6838	162.65	96.2081	162.477	96.0493	166.908	95.6454	166.166	95.597	172.588	95.3548	184.351	94.752		165.625	93.7569		162.401	96.1335		166.658	95.6243		172.34	95.0588
166	93.8105	166.72	93.6796	162.777	96.2057	162.602	96.0466	167.031	95.6439	166.291	95.5952	172.709	95.3525	184.473	94.7484		165.745	93.7528		162.524	96.1311		166.782	95.6228		172.465	95.0561
166.124	93.8063	166.846	93.6754	162.903	96.2033	162.728	96.0444	167.154	95.6422	166.414	95.5935	172.833	95.3509	184.599	94.745		165.876	93.749		162.65	96.1287		166.908	95.6212		172.588	95.0534
166.25	93.8024	166.972	93.6712	163.025	96.2014	162.848	96.0426	167.277	95.6407	166.536	95.5922	172.961	95.3491	184.719	94.7414		166	93.7451		162.777	96.1261		167.031	95.6195		172.709	95.0505
166.375	93.7983	167.098	93.6669	163.15	96.1995	162.978	96.0404	167.402	95.6393	166.661	95.5908	173.081	95.3472	184.844	94.7381		166.124	93.7408		162.903	96.1238		167.154	95.6179		172.833	95.0479
166.498	93.7947	167.22	93.6627	163.276	96.1977	163.102	96.0384	167.526	95.6379	166.79	95.5896	173.208	95.3453	184.973	94.7347		166.25	93.7368		163.025	96.122		167.277	95.6165		172.961	95.0453
166.622	93.7904	167.348	93.6586	163.402	96.1959	163.225	96.0363	167.65	95.6369	166.915	95.5882	173.33	95.3435	185.094	94.7313		166.375	93.7326		163.15	96.1199		167.402	95.615		173.081	95.0426
166.744	93.786	167.475	93.6546	163.53	96.1937	163.355	96.0342	167.776	95.6357	167.036	95.5867	173.456	95.3417	185.212	94.7278		166.498	93.7287		163.276	96.118		167.526	95.6138		173.208	95.04
166.873	93.7816	167.602	93.6504	163.653	96.1919	163.479	96.032	167.904	95.6344	167.163	95.5851	173.583	95.3401	185.339	94.7244		166.622	93.7245		163.402	96.1161		167.65	95.6125		173.33	95.0374
166.999	93.7774	167.726	93.6461	163.778	96.1901	163.607	96.03	168.028	95.6332	167.288	95.5836	173.71	95.3383	185.463	94.7209		166.744	93.7203		163.53	96.1139		167.776	95.6112		173.456	95.0347
167.125	93.7733	167.851	93.6419	163.904	96.1886	163.727	96.0282	168.151	95.6319	167.412	95.5823	173.832	95.3365	185.589	94.7175		166.873	93.716		163.653	96.112		167.904	95.6098		173.583	95.0323
167.253	93.769	167.976	93.6378	164.03	96.1873	163.854	96.0264	168.277	95.6307	167.538	95.5811	173.956	95.3353	185.711	94.7139		166.999	93.7118		163.778	96.1101		168.028	95.6084		173.71	95.0296
167.374	93.7648	168.1	93.6336	164.155	96.1856	163.982	96.0246	168.402	95.6296	167.66	95.5796	174.083	95.3332	185.836	94.7099		167.125	93.7076		163.904	96.1084		168.151	95.6071		173.832	95.027
167.5	93.7602	168.226	93.6295	164.278	96.1835	164.108	96.0229	168.525	95.6282	167.786	95.5779	174.205	95.3312	185.96	94.7058		167.253	93.7034		164.03	96.1069		168.277	95.6059		173.956	95.0246
167.622	93.7561	168.353	93.6253	164.405	96.1812	164.23	96.021	168.649	95.627	167.914	95.5765	174.329	95.3292	186.085	94.7024		167.374	93.6992		164.155	96.1051		168.402	95.6046		174.083	95.0215
167.746	93.7517	168.477	93.6211	164.532	96.1789	164.359	96.0191	168.774	95.6256	168.035	95.5749	174.453	95.3273	186.209	94.6984		167.5	93.6948		164.278	96.1032		168.525	95.603		174.205	95.0185
167.876	93.7476	168.602	93.6169	164.658	96.1764	164.483	96.0171	168.899	95.6238	168.163	95.5734	174.578	95.325	186.335	94.6945		167.622	93.6907		164.405	96.1011		168.649	95.6017		174.329	95.0158
168	93.7434	168.728	93.6127	164.783	96.1741	164.607	96.0153	169.024	95.6221	168.283	95.5718	174.703	95.323	186.461	94.6904		167.746	93.6864		164.532	96.099		168.774	95.6002		174.453	95.0129
168.126	93.7394	168.853	93.6087	164.906	96.1718	164.731	96.0134	169.147	95.6205	168.41	95.5705	174.828	95.3206	186.584	94.6863		167.876	93.6822		164.658	96.0967		168.899	95.5986		174.578	95.0097
168.253	93.7354	168.974	93.6045	165.031	96.1693	164.856	96.0111	169.269	95.6186	168.534	95.5692	174.951	95.3186	186.708	94.6826		168	93.678		164.783	96.0947		169.024	95.597		174.703	95.0067
168.377	93.731	169.103	93.6002	165.155	96.1666	164.981	96.0091	169.392	95.617	168.659	95.5677	175.077	95.3166	186.832	94.6786		168.126	93.6741		164.906	96.0926		169.147	95.5955		174.828	95.0035
168.501	93.727	169.228	93.5959	165.279	96.1639	165.11	96.0069	169.518	95.6155	168.784	95.5664	175.201	95.3146	186.955	94.6753		168.253	93.67		165.031	96.0902		169.269	95.5939		174.951	95.0006
168.623	93.7231	169.354	93.5915	165.406	96.1615	165.235	96.0046	169.642	95.6137	168.905	95.5651	175.326	95.3132	187.079	94.6722		168.377	93.6656		165.155	96.0879		169.392	95.5924		175.077	94.9976
168.75	93.7194	169.476	93.5871	165.531	96.1592	165.356	96.0018	169.767	95.612	169.032	95.5637	175.451	95.3115	187.203	94.669		168.501	93.6614		165.279	96.0854		169.518	95.5909		175.201	94.995
168.875	93.715	169.601	93.5828	165.656	96.1567	165.481	95.9994	169.893	95.6102	169.159	95.5623	175.573	95.3097	187.327	94.6654		168.623	93.6573		165.406	96.083		169.642	95.5894		175.326	94.9927
169.003	93.7106	169.73	93.5783	165.782	96.1544	165.611	95.9971	170.019	95.6084	169.285	95.561	175.702	95.308	187.452	94.662		168.75	93.6533		165.531	96.0805		169.767	95.5879		175.451	94.9902
169.127	93.7064	169.853	93.5741	165.909	96.152	165.736	95.9949	170.138	95.6068	169.408	95.5596	175.826	95.3069	187.578	94.6586		168.875	93.6489		165.656	96.0781		169.893	95.5863		175.573	94.9875
169.251	93.7024	169.981	93.5697	166.031	96.1497	165.861	95.9929	170.266	95.6052	169.534	95.5583	175.949	95.3048	187.701	94.6555		169.003	93.6445		165.782	96.0757		170.019	95.5847		175.702	94.985
169.375	93.6982	170.104	93.5652	166.157	96.1476	165.987	95.9904	170.39	95.6033	169.656	95.5567	176.074	95.3029	187.826	94.6524		169.127	93.6402		165.909	96.0734		170.138	95.5832		175.826	94.9828
169.5	93.6938	170.233	93.5609	166.285	96.1457	166.111	95.9879	170.512	95.6016	169.781	95.5551	176.197	95.3006	187.952	94.6494		169.251	93.6361		166.031	96.0713		170.266	95.5818		175.949	94.9801
169.625	93.6899	170.356	93.5566	166.406	96.144	166.237	95.9853	170.639	95.5999	169.904	95.5536	176.322	95.2983	188.075	94.6465		169.375	93.6317		166.157	96.069		170.39	95.58		176.074	94.9776
169.75	93.6859	170.479	93.5523	166.533	96.1417	166.362	95.9826	170.766	95.5982	170.032	95.5517	176.447	95.2958	188.197	94.6428		169.5	93.6274		166.285	96.0668		170.512	95.5784		176.197	94.975
169.875	93.6818	170.602	93.5479	166.659	96.1394	166.486	95.9801	170.889	95.5966	170.155	95.5501	176.571	95.2928	188.322	94.6387		169.625	93.6233		166.406	96.0646		170.639	95.5767		176.322	94.9724
169.998	93.6776	170.729	93.5436	166.784	96.137	166.611	95.9774	171.011	95.595	170.278	95.5486	176.697	95.2904	188.446	94.6346		169.75	93.6191		166.533	96.0621		170.766	95.5749		176.447	94.9693
170.123	93.6736	170.857	93.5392	166.909	96.1348	166.738	95.9745	171.137	95.5934	170.405	95.5468	176.823	95.2878	188.566	94.6307		169.875	93.6149		166.659	96.0597		170.889	95.5734		176.571	94.9657
170.247	93.6693	170.977	93.5349	167.036	96.1329	166.866	95.9714	171.263	95.5917	170.524	95.545	176.946	95.2857	188.695	94.6267		169.998	93.6106		166.784	96.0572		171.011	95.5718		176.697	94.9625
170.374	93.6651	171.11	93.5304	167.161	96.1305	166.987	95.968	171.383	95.5898	170.653	95.543	177.071	95.2833	188.821	94.6226		170.123	93.6064		166.909	96.0547		171.137	95.5701		176.823	94.9593
170.499	93.6608	171.232	93.5261	167.284	96.128	167.111	95.9647	171.511	95.5879	170.775	95.541	177.197	95.2816	188.94	94.618		170.247	93.6021		167.036	96.0521		171.263	95.5683		176.946	94.9562
170.624	93.6564	171.356	93.522	167.412	96.125	167.239	95.9616	171.63	95.5863	170.898	95.5391	177.32	95.2796	189.068	94.6134		170.374	93.5978		167.161	96.0493		171.383	95.5664		177.071	94.9529
170.747	93.6523	171.478	93.5174	167.535	96.122	167.366	95.9589	171.757	95.5845	171.023	95.5372	177.445	95.2777	189.189	94.6083		170.499	93.5935		167.284	96.0464		171.511	95.5644		177.197	94.9498
170.873	93.6477	171.608	93.513	167.658	96.1186	167.488	95.956	171.883	95.5826	171.15	95.5352	177.569	95.2756	189.319	94.6036		170.624	93.5892		167.412	96.0433		171.63	95.5627		177.32	94.9465
170.999	93.643	171.732	93.5086	167.784	96.1157	167.615	95.9533	172.007	95.5806	171.273	95.5335	177.69	95.2735	189.439	94.5995		170.747	93.5849		167.535	96.0404		171.757	95.5608		177.445	94.943
171.121	93.6384	171.855	93.5042	167.912	96.1128	167.741	95.9506	172.132	95.5786	171.397	95.5314	177.816	95.2714	189.563	94.5957		170.873	93.5803		167.658	96.0373		171.883	95.5589		177.569	94.9396
171.249	93.6338	171.981	93.4999	168.036	96.11	167.865	95.9483	172.257	95.5768	171.519	95.5294	177.942	95.269	189.686	94.5915		170.999	93.5758		167.784	96.0345		172.007	95.557		177.69	94.9365
171.375	93.629	172.106	93.4959	168.162	96.1068	167.991	95.9458	172.376	95.5747	171.641	95.5273	178.064	95.2668	189.812	94.5872		171.121	93.5713		167.912	96.0317		172.132	95.555		177.816	94.9336
171.498	93.6243	172.227	93.4916	168.287	96.1028	168.118	95.9434	172.504	95.5728	171.767	95.5255	178.19	95.2639	189.936	94.5832		171.249	93.5669		168.036	96.0291		172.257	95.5531		177.942	94.9302
171.623	93.6194	172.356	93.4873	168.413	96.0997	168.243	95.9413	172.628	95.5711	171.893	95.5239	178.316	95.2611	190.062	94.5793		171.375	93.5624		168.162	96.0263		172.376	95.551		178.064	94.927
171.747	93.6143	172.48	93.483	168.539	96.097	168.364	95.9389	172.754	95.5696	172.018	95.5224	178.438	95.2585	190.187	94.5757		171.498	93.558		168.287	96.0231		172.504	95.5491		178.19	94.9236
171.876	93.6095	172.606	93.4785	168.663	96.0942	168.491	95.9366	172.875	95.5678	172.142	95.5206	178.563	95.2563	190.31	94.5721		171.623	93.5534		168.413	96.0205		172.628	95.5475		178.316	94.9202
172	93.6045	172.731	93.4742	168.789	96.0914	168.613	95.9341	172.999	95.5661	172.265	95.519	178.691	95.2542	190.435	94.5685		171.747	93.5487		168.539	96.0179		172.754	95.546		178.438	94.9171
172.123	93.5999	172.857	93.4699	168.914	96.0888	168.742	95.9313	173.126	95.5641	172.39	95.5175	178.815	95.252	190.56	94.5644		171.876	93.544		168.663	96.0154		172.875	95.5442		178.563	94.9142
172.247	93.5953	172.984	93.4653	169.037	96.086	168.867	95.9286	173.252	95.5618	172.513	95.5159	178.94	95.25	190.686	94.5601		172	93.5393		168.789	96.0128		172.999	95.5426		178.691	94.9113
172.37	93.5907	173.108	93.4609	169.163	96.0829	168.993	95.9257	173.374	95.5598	172.636	95.5142	179.062	95.2479	190.809	94.556		172.123	93.5349		168.914	96.0101		173.126	95.5408		178.815	94.9082
172.496	93.5859	173.232	93.4565	169.284	96.0797	169.119	95.9231	173.498	95.5577	172.76	95.5127	179.187	95.2457	190.931	94.5522		172.247	93.5303		169.037	96.0073		173.252	95.5388		178.94	94.9051
172.623	93.5813	173.358	93.452	169.413	96.0769	169.244	95.9208	173.627	95.5561	172.885	95.5113	179.313	95.2433	191.055	94.5484		172.37	93.5258		169.163	96.0043		173.374	95.537		179.062	94.9019
172.746	93.5766	173.48	93.4474	169.538	96.0745	169.368	95.9183	173.75	95.5543	173.016	95.5098	179.436	95.2409	191.18	94.5444		172.496	93.5212		169.284	96.0014		173.498	95.5352		179.187	94.8989
172.875	93.5723	173.605	93.4428	169.662	96.0719	169.493	95.9157	173.876	95.5522	173.137	95.5078	179.557	95.2385	191.302	94.5399		172.623	93.5166		169.413	95.9989		173.627	95.5337		179.313	94.8959
172.995	93.5678	173.733	93.4383	169.785	96.069	169.618	95.9129	173.998	95.55	173.26	95.5059	179.684	95.2357	191.427	94.5356		172.746	93.512		169.538	95.9964		173.75	95.532		179.436	94.8927
173.123	93.5633	173.855	93.4338	169.91	96.0667	169.74	95.9103	174.125	95.548	173.387	95.5042	179.809	95.2327	191.549	94.5311		172.875	93.5076		169.662	95.9938		173.876	95.53		179.557	94.8892
173.246	93.5588	173.981	93.4291	170.034	96.064	169.866	95.9078	174.247	95.5462	173.51	95.5023	179.938	95.2298	191.675	94.5268		172.995	93.5031		169.785	95.991		173.998	95.528		179.684	94.8856
173.37	93.554	174.109	93.4246	170.163	96.0614	169.989	95.9055	174.371	95.5446	173.637	95.5003	180.057	95.2272	191.8	94.5226		173.123	93.4985		169.91	95.9885		174.125	95.5261		179.809	94.8819
173.496	93.5493	174.234	93.4202	170.289	96.0592	170.118	95.9031	174.497	95.543	173.762	95.4981	180.183	95.2242	191.922	94.5186		173.246	93.4939		170.034	95.9859		174.247	95.5242		179.938	94.8783
173.624	93.5446	174.361	93.4158	170.414	96.0576	170.245	95.9007	174.621	95.5412	173.885	95.4961	180.31	95.2214	192.048	94.5145		173.37	93.4893		170.163	95.9835		174.371	95.5224		180.057	94.8749
173.744	93.5398	174.485	93.4109	170.538	96.0559	170.37	95.8979	174.744	95.5395	174.011	95.494	180.432	95.2189	192.173	94.5097		173.496	93.4847		170.289	95.9811		174.497	95.5206		180.183	94.8714
173.871	93.5353	174.609	93.4061	170.665	96.0534	170.492	95.8948	174.868	95.5374	174.133	95.4919	180.56	95.2164	192.298	94.5052		173.624	93.4802		170.414	95.9792		174.621	95.5187		180.31	94.868
173.992	93.5306	174.732	93.4016	170.788	96.0512	170.617	95.8916	174.993	95.5351	174.26	95.4896	180.686	95.2137	192.419	94.5009		173.744	93.4754		170.538	95.9769		174.744	95.5167		180.432	94.8643
174.119	93.526	174.858	93.3971	170.911	96.049	170.742	95.8884	175.117	95.5332	174.381	95.4874	180.81	95.2115	192.547	94.497		173.871	93.4707		170.665	95.9741		174.868	95.5146		180.56	94.8608
174.242	93.5219	174.981	93.3925	171.036	96.0466	170.867	95.8855	175.239	95.5312	174.505	95.4853	180.932	95.209	192.668	94.4927		173.992	93.4661		170.788	95.9714		174.993	95.5124		180.686	94.8573
174.367	93.5179	175.107	93.3879	171.159	96.0437	170.995	95.8824	175.364	95.5294	174.633	95.483	181.058	95.2067	192.793	94.4884		174.119	93.4616		170.911	95.9687		175.117	95.5103		180.81	94.8542
174.494	93.5133	175.231	93.3833	171.287	96.0408	171.116	95.8793	175.489	95.5272	174.755	95.4807	181.182	95.2041	192.915	94.4843		174.242	93.4572		171.036	95.966		175.239	95.5083		180.932	94.8509
174.619	93.509	175.358	93.3785	171.411	96.038	171.241	95.8764	175.618	95.5248	174.878	95.4783	181.303	95.2014	193.045	94.48		174.367	93.4529		171.159	95.9631		175.364	95.5062		181.058	94.8475
174.745	93.5048	175.483	93.3739	171.537	96.0344	171.364	95.8737	175.74	95.5227	175.004	95.4763	181.429	95.199	193.164	94.4754		174.494	93.4483		171.287	95.9601		175.489	95.5039		181.182	94.8442
174.871	93.5005	175.607	93.3693	171.664	96.0303	171.489	95.8708	175.862	95.5203	175.13	95.4743	181.555	95.1963	193.291	94.4706		174.619	93.4437		171.411	95.9572		175.618	95.5016		181.303	94.8407
174.994	93.4962	175.733	93.3646	171.787	96.0266	171.621	95.868	175.988	95.5179	175.253	95.472	181.679	95.1935	193.413	94.4665		174.745	93.4394		171.537	95.954		175.74	95.4995		181.429	94.8372
175.119	93.4918	175.856	93.3601	171.91	96.0235	171.739	95.8654	176.109	95.5158	175.376	95.4698	181.804	95.1909	193.538	94.4618		174.871	93.4349		171.664	95.9505		175.862	95.4973		181.555	94.8335
175.244	93.4878	175.986	93.3552	172.036	96.0199	171.865	95.8629	176.234	95.514	175.502	95.4678	181.925	95.1887	193.659	94.4573		174.994	93.4304		171.787	95.9473		175.988	95.495		181.679	94.83
175.37	93.4835	176.112	93.3504	172.158	96.0165	171.994	95.8602	176.36	95.512	175.627	95.4658	182.055	95.1859	193.787	94.4525		175.119	93.426		171.91	95.9444		176.109	95.4928		181.804	94.8263
175.494	93.4787	176.238	93.3456	172.286	96.0133	172.114	95.8571	176.483	95.5098	175.748	95.4636	182.178	95.1835	193.912	94.4477		175.244	93.4215		172.036	95.9414		176.234	95.4909		181.925	94.823
175.619	93.4737	176.36	93.3411	172.408	96.0099	172.24	95.8541	176.609	95.5072	175.875	95.4614	182.302	95.1809	194.035	94.4432		175.37	93.417		172.158	95.9383		176.36	95.4889		182.055	94.8192
175.743	93.469	176.484	93.3364	172.535	96.007	172.366	95.851	176.732	95.5045	175.996	95.4592	182.426	95.1779	194.159	94.438		175.494	93.4121		172.286	95.9352		176.483	95.4867		182.178	94.8156
175.866	93.4641	176.608	93.3318	172.658	96.0037	172.493	95.8478	176.862	95.5021	176.122	95.4572	182.551	95.1748	194.28	94.4331		175.619	93.4074		172.408	95.932		176.609	95.4843		182.302	94.812
175.991	93.4592	176.734	93.327	172.791	96.0009	172.616	95.8447	176.983	95.4996	176.249	95.4551	182.673	95.1717	194.405	94.4284		175.743	93.4027		172.535	95.929		176.732	95.4818		182.426	94.808
176.119	93.4542	176.859	93.3221	172.911	95.9984	172.74	95.8416	177.104	95.4976	176.369	95.4528	182.798	95.1689	194.531	94.4241		175.866	93.398		172.658	95.9257		176.862	95.4796		182.551	94.804
176.247	93.4489	176.983	93.3175	173.036	95.9963	172.867	95.8384	177.231	95.4955	176.495	95.451	182.923	95.1662	194.657	94.4196		175.991	93.3931		172.791	95.9228		176.983	95.4774		182.673	94.8
176.369	93.4439	177.107	93.3128	173.16	95.9938	172.991	95.835	177.355	95.4931	176.62	95.4488	183.045	95.1633	194.783	94.4152		176.119	93.3882		172.911	95.92		177.104	95.4752		182.798	94.7965
176.493	93.4386	177.231	93.3082	173.286	95.9919	173.114	95.8319	177.48	95.4908	176.743	95.4466	183.169	95.16	194.905	94.4108		176.247	93.3832		173.036	95.9173		177.231	95.4732		182.923	94.7929
176.617	93.4331	177.359	93.3033	173.409	95.9891	173.244	95.8284	177.602	95.4883	176.867	95.4442	183.294	95.157	195.028	94.4063		176.369	93.3783		173.16	95.9144		177.355	95.471		183.045	94.7893
176.744	93.4281	177.485	93.2985	173.535	95.986	173.368	95.8254	177.729	95.4859	176.993	95.4419	183.423	95.1541	195.154	94.4018		176.493	93.3734		173.286	95.9119		177.48	95.4687		183.169	94.7854
176.869	93.4231	177.609	93.2937	173.66	95.9831	173.49	95.8225	177.851	95.4837	177.119	95.4399	183.543	95.1511	195.281	94.3972		176.617	93.3682		173.409	95.9088		177.602	95.4663		183.294	94.7817
176.992	93.4183	177.734	93.2889	173.781	95.9802	173.616	95.8194	177.979	95.4818	177.242	95.4379	183.667	95.1485	195.401	94.3929		176.744	93.3633		173.535	95.9057		177.729	95.4639		183.423	94.7779
177.117	93.4135	177.859	93.284	173.911	95.9774	173.741	95.8161	178.103	95.4798	177.368	95.4358	183.792	95.1458	195.529	94.3886		176.869	93.3584		173.66	95.9028		177.851	95.4618		183.543	94.7742
177.242	93.4087	177.979	93.2793	174.036	95.9741	173.864	95.8129	178.223	95.4773	177.491	95.4335	183.914	95.143	195.65	94.3841		176.992	93.3536		173.781	95.8998		177.979	95.4599		183.667	94.7707
177.366	93.4039	178.106	93.2747	174.162	95.9708	173.988	95.8095	178.35	95.4749	177.612	95.4312	184.042	95.1403	195.777	94.3793		177.117	93.3488		173.911	95.8967		178.103	95.4578		183.792	94.7672
177.492	93.3993	178.231	93.2698	174.282	95.9668	174.113	95.8062	178.474	95.4727	177.737	95.4286	184.163	95.1373	195.899	94.3745		177.242	93.344		174.036	95.8935		178.223	95.4554		183.914	94.7636
177.616	93.3943	178.357	93.2652	174.41	95.9628	174.239	95.8031	178.598	95.4701	177.862	95.4263	184.292	95.1339	196.024	94.3696		177.366	93.3393		174.162	95.8901		178.35	95.453		184.042	94.7598
177.742	93.3891	178.483	93.2604	174.535	95.9589	174.359	95.7996	178.721	95.4675	177.986	95.4239	184.415	95.1308	196.148	94.3647		177.492	93.3346		174.282	95.8865		178.474	95.4506		184.163	94.7559
177.866	93.3844	178.609	93.2556	174.66	95.9554	174.485	95.7965	178.848	95.4651	178.11	95.4217	184.538	95.1278	196.272	94.3598		177.616	93.3297		174.41	95.8829		178.598	95.4482		184.292	94.7517
177.987	93.3794	178.731	93.2509	174.784	95.952	174.612	95.7931	178.976	95.4627	178.238	95.4194	184.665	95.1247	196.397	94.3549		177.742	93.3248		174.535	95.8792		178.721	95.4457		184.415	94.7477
178.115	93.3743	178.858	93.246	174.908	95.9484	174.743	95.7899	179.099	95.4601	178.36	95.417	184.787	95.1218	196.522	94.3503		177.866	93.32		174.66	95.8759		178.848	95.4434		184.538	94.7438
178.235	93.3692	178.979	93.2412	175.031	95.9447	174.865	95.7868	179.22	95.4577	178.488	95.4144	184.911	95.1182	196.644	94.3456		177.987	93.3152		174.784	95.8726		178.976	95.441		184.665	94.7398
178.362	93.3642	179.107	93.2361	175.156	95.941	174.988	95.7835	179.344	95.4552	178.61	95.4119	185.036	95.1151	196.771	94.3409		178.115	93.3102		174.908	95.8692		179.099	95.4386		184.787	94.736
178.487	93.359	179.231	93.2311	175.281	95.9375	175.111	95.7803	179.469	95.4525	178.731	95.4094	185.162	95.1121	196.897	94.3363		178.235	93.3052		175.031	95.8657		179.22	95.4361		184.911	94.7319
178.612	93.3538	179.356	93.2261	175.408	95.934	175.239	95.7772	179.597	95.4496	178.858	95.4072	185.285	95.1088	197.02	94.3317		178.362	93.3002		175.156	95.8622		179.344	95.4335		185.036	94.728
178.737	93.3487	179.477	93.2214	175.532	95.9306	175.362	95.7739	179.719	95.4472	178.983	95.4048	185.411	95.1059	197.143	94.3269		178.487	93.295		175.281	95.8589		179.469	95.4309		185.162	94.7242
178.86	93.344	179.602	93.2164	175.656	95.927	175.487	95.771	179.839	95.4448	179.105	95.4023	185.535	95.1032	197.269	94.3222		178.612	93.29		175.408	95.8556		179.597	95.4284		185.285	94.7202
178.987	93.3394	179.728	93.2115	175.784	95.9236	175.612	95.7679	179.97	95.4424	179.228	95.3998	185.657	95.1004	197.391	94.3174		178.737	93.2851		175.532	95.8523		179.719	95.426		185.411	94.7164
179.113	93.3342	179.851	93.2067	175.91	95.9195	175.737	95.7648	180.091	95.4399	179.355	95.3971	185.779	95.0971	197.515	94.3123		178.86	93.2802		175.656	95.849		179.839	95.4235		185.535	94.7127
179.237	93.3291	179.979	93.202	176.036	95.916	175.864	95.7616	180.219	95.4376	179.481	95.3947	185.906	95.0938	197.641	94.3074		178.987	93.2754		175.784	95.8457		179.97	95.4211		185.657	94.7089
179.359	93.3245	180.103	93.1971	176.16	95.9125	175.985	95.7583	180.339	95.4349	179.606	95.3923	186.03	95.0904	197.766	94.3023		179.113	93.2705		175.91	95.8422		180.091	95.4185		185.779	94.7047
179.485	93.3192	180.23	93.1922	176.285	95.9087	176.113	95.755	180.466	95.4323	179.727	95.3898	186.156	95.087	197.887	94.2975		179.237	93.2656		176.036	95.8388		180.219	95.4162		185.906	94.7006
179.611	93.3141	180.355	93.1874	176.406	95.905	176.237	95.7519	180.589	95.4297	179.851	95.3872	186.281	95.0834	198.011	94.2925		179.359	93.2608		176.16	95.8354		180.339	95.4136		186.03	94.6964
179.736	93.3089	180.482	93.1827	176.53	95.9018	176.358	95.7486	180.714	95.4277	179.98	95.3849	186.403	95.0799	198.139	94.2872		179.485	93.2557		176.285	95.8318		180.466	95.411		186.156	94.6923
179.859	93.3038	180.604	93.1775	176.655	95.8984	176.484	95.7453	180.841	95.4254	180.102	95.3823	186.53	95.0766	198.262	94.2818		179.611	93.2508		176.406	95.8285		180.589	95.4084		186.281	94.688
179.989	93.2983	180.728	93.1724	176.779	95.8951	176.606	95.7419	180.962	95.4226	180.224	95.38	186.652	95.0729	198.387	94.2767		179.736	93.2458		176.53	95.8252		180.714	95.4063		186.403	94.6836
180.11	93.293	180.854	93.1674	176.904	95.8922	176.729	95.7384	181.083	95.4198	180.348	95.3775	186.778	95.0693	198.509	94.2714		179.859	93.2407		176.655	95.8219		180.841	95.4039		186.53	94.6792
180.234	93.2877	180.98	93.1624	177.028	95.8886	176.855	95.7349	181.21	95.4171	180.475	95.375	186.899	95.0662	198.638	94.2661		179.989	93.2354		176.779	95.8185		180.962	95.4013		186.652	94.6748
180.36	93.283	181.106	93.1573	177.154	95.8859	176.982	95.7312	181.334	95.4143	180.6	95.3725	187.023	95.0629	198.759	94.2608		180.11	93.2302		176.904	95.8153		181.083	95.3986		186.778	94.6704
180.481	93.2778	181.226	93.152	177.277	95.883	177.107	95.7275	181.46	95.4112	180.723	95.3699	187.149	95.0598	198.885	94.2558		180.234	93.225		177.028	95.8117		181.21	95.3961		186.899	94.6662
180.61	93.2722	181.351	93.1469	177.401	95.8801	177.233	95.7239	181.585	95.4086	180.85	95.3674	187.273	95.0566	199.01	94.2504		180.36	93.2201		177.154	95.8086		181.334	95.3934		187.023	94.6618
180.736	93.2672	181.478	93.1417	177.528	95.8772	177.356	95.7203	181.709	95.4059	180.974	95.3649	187.398	95.0538	199.135	94.2444		180.481	93.2149		177.277	95.8053		181.46	95.3906		187.149	94.6578
180.858	93.2624	181.602	93.1366	177.654	95.8741	177.481	95.7166	181.832	95.4033	181.097	95.3624	187.523	95.0507	199.26	94.2386		180.61	93.2096		177.401	95.802		181.585	95.388		187.273	94.6535
180.984	93.2574	181.726	93.1315	177.778	95.8708	177.608	95.713	181.956	95.4004	181.225	95.3598	187.648	95.0475	199.38	94.233		180.736	93.2044		177.528	95.7987		181.709	95.3854		187.398	94.6491
181.106	93.2526	181.854	93.1266	177.903	95.8671	177.73	95.7092	182.079	95.3978	181.345	95.357	187.769	95.0441	199.505	94.2273		180.858	93.1995		177.654	95.7954		181.832	95.3829		187.523	94.6446
181.234	93.248	181.976	93.1217	178.025	95.8635	177.858	95.7056	182.204	95.3952	181.47	95.3541	187.895	95.0405	199.631	94.2215		180.984	93.1945		177.778	95.7919		181.956	95.3801		187.648	94.6402
181.361	93.2432	182.098	93.1167	178.152	95.8594	177.979	95.7017	182.331	95.3927	181.594	95.3512	188.019	95.0366	199.757	94.216		181.106	93.1896		177.903	95.7882		182.079	95.3774		187.769	94.6357
181.482	93.2382	182.229	93.1115	178.274	95.8559	178.105	95.6978	182.457	95.3897	181.721	95.3483	188.143	95.0327	199.881	94.2104		181.234	93.1849		178.025	95.7845		182.204	95.3747		187.895	94.631
181.608	93.2331	182.356	93.1064	178.4	95.8519	178.23	95.6941	182.581	95.3872	181.845	95.3455	188.268	95.0292	200.004	94.2048		181.361	93.18		178.152	95.7806		182.331	95.372		188.019	94.6263
181.731	93.2282	182.477	93.1014	178.525	95.8474	178.357	95.6904	182.705	95.3846	181.969	95.3425	188.395	95.0258	200.129	94.199		181.482	93.1749		178.274	95.7769		182.457	95.369		188.143	94.6215
181.857	93.2233	182.602	93.0962	178.648	95.8434	178.482	95.6866	182.827	95.3821	182.093	95.3396	188.522	95.0222	200.253	94.1936		181.608	93.1698		178.4	95.773		182.581	95.3663		188.268	94.617
181.981	93.2187	182.727	93.0911	178.774	95.8395	178.604	95.6827	182.954	95.3794	182.217	95.3367	188.644	95.0184	200.376	94.1888		181.731	93.1648		178.525	95.7689		182.705	95.3636		188.395	94.6124
182.103	93.2139	182.853	93.0857	178.902	95.8358	178.728	95.6792	183.079	95.3766	182.342	95.3337	188.767	95.0152	200.501	94.1838		181.857	93.1597		178.648	95.765		182.827	95.3608		188.522	94.6079
182.229	93.2087	182.974	93.0803	179.025	95.8315	178.851	95.6757	183.203	95.3737	182.463	95.3307	188.893	95.0118	200.625	94.1789		181.981	93.1549		178.774	95.7611		182.954	95.3581		188.644	94.6036
182.354	93.2035	183.1	93.0748	179.149	95.8275	178.975	95.672	183.327	95.3704	182.59	95.3278	189.016	95.0083	200.752	94.1741		182.103	93.1498		178.902	95.7575		183.079	95.3552		188.767	94.5995
182.479	93.1982	183.225	93.0693	179.274	95.8237	179.099	95.6681	183.45	95.3672	182.715	95.325	189.141	95.0049	200.876	94.1692		182.229	93.1445		179.025	95.7536		183.203	95.3522		188.893	94.5953
182.601	93.1928	183.349	93.0638	179.399	95.8198	179.227	95.6644	183.572	95.3642	182.838	95.3222	189.265	95.0017	201	94.164		182.354	93.1392		179.149	95.7497		183.327	95.3491		189.016	94.5912
182.728	93.1873	183.474	93.0584	179.52	95.8161	179.349	95.6609	183.7	95.3613	182.963	95.3195	189.391	94.9984	201.122	94.1589		182.479	93.1338		179.274	95.7459		183.45	95.3461		189.141	94.5871
182.852	93.1817	183.6	93.0528	179.649	95.8121	179.475	95.6576	183.824	95.358	183.086	95.3166	189.514	94.9951	201.25	94.1537		182.601	93.1283		179.399	95.7421		183.572	95.3432		189.265	94.5829
182.978	93.1765	183.725	93.0473	179.773	95.808	179.601	95.654	183.951	95.3551	183.211	95.3141	189.638	94.9914	201.371	94.1486		182.728	93.1228		179.52	95.7385		183.7	95.3404		189.391	94.5787
183.099	93.1713	183.85	93.0419	179.896	95.8037	179.724	95.6504	184.068	95.352	183.334	95.3112	189.762	94.988	201.497	94.1432		182.852	93.1173		179.649	95.7349		183.824	95.3373		189.514	94.5744
183.229	93.1655	183.975	93.0365	180.026	95.7994	179.85	95.6469	184.2	95.3487	183.458	95.3082	189.887	94.9847	201.62	94.1377		182.978	93.1119		179.773	95.731		183.951	95.3346		189.638	94.57
183.354	93.1593	184.101	93.031	180.147	95.795	179.976	95.643	184.321	95.3456	183.583	95.3055	190.011	94.9808	201.748	94.1323		183.099	93.1066		179.896	95.727		184.068	95.3316		189.762	94.5656
183.474	93.1536	184.223	93.0258	180.275	95.7906	180.096	95.6389	184.449	95.3428	183.707	95.3028	190.135	94.9768	201.87	94.1266		183.229	93.101		180.026	95.7231		184.2	95.3285		189.887	94.5612
183.601	93.1479	184.348	93.0204	180.4	95.7865	180.221	95.6351	184.57	95.3401	183.829	95.2999	190.26	94.9729	201.994	94.1207		183.354	93.0952		180.147	95.719		184.321	95.3256		190.011	94.5565
183.728	93.1419	184.474	93.0151	180.521	95.7823	180.348	95.6312	184.691	95.337	183.954	95.2972	190.384	94.969	202.123	94.115		183.474	93.0897		180.275	95.7147		184.449	95.3228		190.135	94.5517
183.849	93.1361	184.6	93.0096	180.649	95.7783	180.47	95.6273	184.818	95.3341	184.077	95.2944	190.506	94.9651	202.246	94.1097		183.601	93.0841		180.4	95.7108		184.57	95.32		190.26	94.5468
183.976	93.1305	184.724	93.0042	180.772	95.7738	180.597	95.6232	184.942	95.3311	184.203	95.2918	190.632	94.9615	202.369	94.104		183.728	93.0785		180.521	95.7068		184.691	95.3171		190.384	94.542
184.101	93.1249	184.852	92.9986	180.895	95.7696	180.722	95.6187	185.067	95.3282	184.324	95.2891	190.759	94.9574	202.49	94.0983		183.849	93.0729		180.649	95.7028		184.818	95.3142		190.506	94.5374
184.224	93.1187	184.973	92.9931	181.023	95.7658	180.847	95.6144	185.196	95.3252	184.45	95.2861	190.882	94.9536	202.616	94.0924		183.976	93.0673		180.772	95.6985		184.942	95.3114		190.632	94.5327
184.35	93.1129	185.1	92.9877	181.145	95.7618	180.973	95.6101	185.316	95.3223	184.576	95.2831	191.005	94.9497	202.744	94.0867		184.101	93.0618		180.895	95.6942		185.067	95.3087		190.759	94.5278
184.472	93.1075	185.224	92.9823	181.271	95.7578	181.096	95.6058	185.443	95.3198	184.7	95.2804	191.13	94.9456	202.869	94.0808		184.224	93.0559		181.023	95.6901		185.196	95.3056		190.882	94.523
184.596	93.102	185.348	92.977	181.394	95.7541	181.221	95.6016	185.565	95.3169	184.824	95.2777	191.256	94.9416	202.989	94.0748		184.35	93.0503		181.145	95.686		185.316	95.3027		191.005	94.5182
184.717	93.0963	185.469	92.9716	181.523	95.7508	181.347	95.5974	185.693	95.3137	184.946	95.2748	191.38	94.9377	203.113	94.0689		184.472	93.0449		181.271	95.6818		185.443	95.3001		191.13	94.5132
184.844	93.0907	185.594	92.9659	181.645	95.7469	181.472	95.5934	185.815	95.3105	185.071	95.272	191.503	94.9337	203.24	94.0627		184.596	93.0395		181.394	95.6779		185.565	95.2973		191.256	94.5082
184.968	93.0851	185.722	92.9604	181.766	95.7426	181.596	95.5897	185.941	95.3076	185.197	95.2691	191.628	94.9301	203.365	94.0566		184.717	93.034		181.523	95.6741		185.693	95.2943		191.38	94.5033
185.09	93.0798	185.847	92.955	181.892	95.7387	181.72	95.5856	186.06	95.3045	185.318	95.2661	191.751	94.9263	203.491	94.05		184.844	93.0283		181.645	95.6702		185.815	95.2913		191.503	94.4982
185.217	93.0741	185.972	92.9494	182.018	95.7347	181.84	95.5817	186.186	95.3014	185.446	95.263	191.876	94.9222	203.614	94.044		184.968	93.0227		181.766	95.6661		185.941	95.2883		191.628	94.4934
185.341	93.0686	186.096	92.9441	182.136	95.7305	181.966	95.5779	186.308	95.2983	185.572	95.2599	192.002	94.9187	203.739	94.0384		185.09	93.0174		181.892	95.6622		186.06	95.2853		191.751	94.4882
185.464	93.0632	186.225	92.9387	182.267	95.7265	182.093	95.5744	186.437	95.295	185.697	95.2567	192.124	94.915	203.864	94.0327		185.217	93.0118		182.018	95.6582		186.186	95.2822		191.876	94.4831
185.59	93.0573	186.345	92.9331	182.392	95.7222	182.221	95.5707	186.563	95.2916	185.82	95.2536	192.251	94.9114	203.986	94.027		185.341	93.0063		182.136	95.6542		186.308	95.2791		192.002	94.4786
185.717	93.0512	186.468	92.9272	182.514	95.7176	182.343	95.5668	186.686	95.288	185.947	95.2502	192.379	94.9076	204.112	94.0211		185.464	93.001		182.267	95.6505		186.437	95.2759		192.124	94.4738
185.836	93.0455	186.595	92.9213	182.642	95.7132	182.465	95.5629	186.81	95.2846	186.066	95.2464	192.5	94.9041	204.236	94.0153		185.59	92.9952		182.392	95.6464		186.563	95.2726		192.251	94.4692
185.962	93.0399	186.72	92.9155	182.761	95.7086	182.593	95.5588	186.932	95.2814	186.19	95.2429	192.626	94.9002	204.365	94.0093		185.717	92.9892		182.514	95.6422		186.686	95.2691		192.379	94.4644
186.087	93.034	186.843	92.9099	182.888	95.7046	182.714	95.5547	187.056	95.278	186.318	95.2395	192.748	94.8963	204.486	94.0038		185.836	92.9834		182.642	95.638		186.81	95.2655		192.5	94.4597
186.211	93.0287	186.969	92.9041	183.014	95.7008	182.842	95.5504	187.181	95.2745	186.441	95.2362	192.873	94.892	204.614	93.9981		185.962	92.9777		182.761	95.6337		186.932	95.2622		192.626	94.4547
186.335	93.0232	187.094	92.8984	183.137	95.6965	182.964	95.5463	187.308	95.2711	186.568	95.2329	192.993	94.8878	204.735	93.9926		186.087	92.9719		182.888	95.6296		187.056	95.2588		192.748	94.4501
186.461	93.0179	187.217	92.8925	183.263	95.6924	183.092	95.542	187.43	95.2678	186.692	95.2294	193.121	94.8835	204.861	93.9865		186.211	92.9664		183.014	95.6256		187.181	95.2554		192.873	94.4451
186.587	93.0121	187.349	92.8867	183.388	95.6884	183.214	95.5378	187.554	95.2646	186.82	95.2258	193.246	94.879	204.984	93.9805		186.335	92.9608		183.137	95.6214		187.308	95.252		192.993	94.4402
186.711	93.0067	187.47	92.8808	183.512	95.6843	183.34	95.5334	187.681	95.2613	186.94	95.2224	193.37	94.8747	205.111	93.9745		186.461	92.9552		183.263	95.6172		187.43	95.2486		193.121	94.435
186.839	93.0014	187.594	92.8749	183.634	95.68	183.467	95.529	187.801	95.2578	187.063	95.219	193.495	94.8701	205.235	93.9681		186.587	92.9494		183.388	95.6131		187.554	95.2452		193.246	94.4297
186.966	92.9957	187.72	92.8691	183.762	95.676	183.584	95.5245	187.928	95.2542	187.188	95.216	193.621	94.8661	205.361	93.962		186.711	92.9437		183.512	95.6088		187.681	95.2418		193.37	94.4246
187.088	92.9904	187.842	92.8631	183.884	95.6717	183.711	95.5202	188.052	95.2507	187.314	95.2132	193.744	94.8617	205.486	93.9564		186.839	92.9381		183.634	95.6045		187.801	95.2384		193.495	94.4191
187.211	92.9849	187.972	92.8573	184.008	95.6672	183.837	95.5158	188.178	95.2472	187.435	95.21	193.865	94.8577	205.613	93.9508		186.966	92.9324		183.762	95.6003		187.928	95.2351		193.621	94.414
187.335	92.9794	188.09	92.8513	184.133	95.6628	183.961	95.5114	188.299	95.2442	187.564	95.2068	193.993	94.8539	205.736	93.9447		187.088	92.9268		183.884	95.5959		188.052	95.232		193.744	94.4091
187.457	92.9733	188.217	92.8456	184.262	95.6581	184.086	95.507	188.423	95.2411	187.685	95.2034	194.116	94.8502	205.861	93.9388		187.211	92.9211		184.008	95.5915		188.178	95.2286		193.865	94.4043
187.586	92.9669	188.338	92.8395	184.386	95.6537	184.209	95.5025	188.55	95.2381	187.811	95.2001	194.239	94.8463	205.984	93.933		187.335	92.9154		184.133	95.5871		188.299	95.2255		193.993	94.3993
187.711	92.9606	188.466	92.8339	184.511	95.6487	184.336	95.4977	188.675	95.2347	187.934	95.1968	194.364	94.8424	206.108	93.9277		187.457	92.9094		184.262	95.5825		188.423	95.2223		194.116	94.3945
187.832	92.9542	188.591	92.828	184.634	95.6439	184.456	95.493	188.797	95.231	188.058	95.1937	194.489	94.8383	206.233	93.9218		187.586	92.9032		184.386	95.5781		188.55	95.2191		194.239	94.3897
187.957	92.948	188.715	92.822	184.755	95.6387	184.581	95.4882	188.925	95.2275	188.186	95.1906	194.613	94.8338	206.359	93.9158		187.711	92.8973		184.511	95.5732		188.675	95.2158		194.364	94.3851
188.084	92.9417	188.842	92.8162	184.882	95.6333	184.711	95.4833	189.046	95.2244	188.31	95.1876	194.74	94.8296	206.484	93.9102		187.832	92.8911		184.634	95.5685		188.797	95.2124		194.489	94.38
188.207	92.9354	188.967	92.8104	185.006	95.6285	184.832	95.4785	189.173	95.2211	188.435	95.1841	194.867	94.8248	206.609	93.9044		187.957	92.885		184.755	95.5635		188.925	95.2091		194.613	94.3748
188.329	92.9289	189.086	92.8047	185.132	95.6232	184.961	95.4739	189.294	95.2173	188.556	95.1806	194.991	94.8204	206.731	93.8982		188.084	92.879		184.882	95.5583		189.046	95.206		194.74	94.3699
188.457	92.9222	189.214	92.7988	185.256	95.6185	185.082	95.4693	189.421	95.2137	188.683	95.1771	195.112	94.8161	206.857	93.8919		188.207	92.8729		185.006	95.5535		189.173	95.2026		194.867	94.3646
188.579	92.9158	189.34	92.7928	185.381	95.6135	185.202	95.4647	189.544	95.2097	188.805	95.1736	195.24	94.8116	206.982	93.8857		188.329	92.8668		185.132	95.5485		189.294	95.199		194.991	94.3593
188.704	92.9096	189.465	92.7866	185.504	95.6091	185.331	95.4599	189.672	95.2059	188.935	95.1701	195.365	94.8071	207.106	93.8792		188.457	92.8605		185.256	95.5439		189.421	95.1954		195.112	94.354
188.828	92.9034	189.587	92.7807	185.63	95.6043	185.456	95.4551	189.797	95.2022	189.058	95.1664	195.485	94.8025	207.23	93.8726		188.579	92.8543		185.381	95.5391		189.544	95.1916		195.24	94.3487
188.953	92.8971	189.713	92.7744	185.753	95.6002	185.583	95.4512	189.918	95.1985	189.183	95.1628	195.611	94.7982	207.355	93.8661		188.704	92.8481		185.504	95.5345		189.672	95.188		195.365	94.3431
189.077	92.891	189.837	92.7683	185.879	95.5955	185.703	95.4469	190.04	95.1951	189.306	95.1591	195.737	94.7939	207.481	93.8594		188.828	92.8421		185.63	95.5297		189.797	95.1843		195.485	94.3375
189.204	92.8847	189.965	92.7622	186.002	95.5914	185.828	95.4429	190.166	95.1914	189.431	95.1555	195.861	94.7897	207.606	93.8525		188.953	92.8357		185.753	95.5257		189.918	95.1806		195.611	94.3322
189.329	92.8785	190.088	92.756	186.127	95.5879	185.955	95.4391	190.291	95.1877	189.558	95.1517	195.986	94.7852	207.73	93.8453		189.077	92.8296		185.879	95.5212		190.04	95.1771		195.737	94.3266
189.452	92.8722	190.21	92.7499	186.251	95.5837	186.075	95.4351	190.415	95.1842	189.68	95.1478	196.108	94.7813	207.858	93.8386		189.204	92.8235		186.002	95.5172		190.166	95.1735		195.861	94.3211
189.578	92.8655	190.334	92.7438	186.375	95.5795	186.201	95.431	190.541	95.1809	189.806	95.144	196.234	94.7768	207.98	93.832		189.329	92.8173		186.127	95.5135		190.291	95.1697		195.986	94.3153
189.702	92.8594	190.461	92.7377	186.503	95.5748	186.326	95.4269	190.665	95.1776	189.928	95.1404	196.358	94.7722	208.103	93.8248		189.452	92.8111		186.251	95.5094		190.415	95.166		196.108	94.3099
189.825	92.853	190.585	92.7314	186.626	95.5702	186.451	95.4227	190.791	95.1741	190.054	95.1367	196.481	94.7675	208.228	93.8181		189.578	92.8047		186.375	95.5052		190.541	95.1624		196.234	94.3044
189.948	92.8467	190.711	92.7252	186.754	95.565	186.574	95.4184	190.918	95.1701	190.176	95.1328	196.607	94.7628	208.352	93.8117		189.702	92.7985		186.503	95.5009		190.665	95.159		196.358	94.2985
190.075	92.8401	190.834	92.7189	186.874	95.5603	186.7	95.4144	191.043	95.1663	190.3	95.1293	196.73	94.7585	208.476	93.8051		189.825	92.7922		186.626	95.4964		190.791	95.1554		196.481	94.2928
190.201	92.8336	190.961	92.7128	187	95.5554	186.826	95.41	191.165	95.1624	190.426	95.1259	196.855	94.7539	208.605	93.7981		189.948	92.786		186.754	95.4917		190.918	95.1515		196.607	94.2872
190.324	92.827	191.082	92.7066	187.121	95.5505	186.948	95.4057	191.289	95.1584	190.551	95.1221	196.98	94.7493	208.727	93.7916		190.075	92.7795		186.874	95.4874		191.043	95.1478		196.73	94.2818
190.451	92.8203	191.207	92.7005	187.244	95.5453	187.076	95.401	191.414	95.1546	190.673	95.1181	197.107	94.7445	208.851	93.7852		190.201	92.7732		187	95.4827		191.165	95.1442		196.855	94.276
190.575	92.8134	191.334	92.6944	187.371	95.5404	187.197	95.3964	191.538	95.1507	190.801	95.1141	197.232	94.7399	208.978	93.7787		190.324	92.7668		187.121	95.4781		191.289	95.1403		196.98	94.2704
190.698	92.8069	191.458	92.688	187.497	95.5352	187.325	95.3919	191.663	95.1464	190.926	95.1104	197.352	94.7352	209.1	93.7718		190.451	92.7604		187.244	95.4732		191.414	95.1363		197.107	94.2648
190.821	92.8005	191.583	92.6815	187.62	95.5308	187.447	95.3871	191.786	95.1425	191.048	95.1066	197.476	94.7308	209.226	93.7651		190.575	92.7539		187.371	95.4684		191.538	95.1324		197.232	94.2593
190.947	92.794	191.709	92.6752	187.744	95.5262	187.568	95.3823	191.912	95.1386	191.176	95.1028	197.604	94.7261	209.352	93.7589		190.698	92.7474		187.497	95.4635		191.663	95.1284		197.352	94.2535
191.074	92.7875	191.834	92.669	187.868	95.5215	187.694	95.3776	192.034	95.1351	191.298	95.0989	197.725	94.7212	209.474	93.7522		190.821	92.741		187.62	95.459		191.786	95.1246		197.476	94.2479
191.194	92.7809	191.957	92.6628	187.996	95.5167	187.817	95.3727	192.16	95.1316	191.421	95.0952	197.851	94.7171	209.601	93.7453		190.947	92.7346		187.744	95.4543		191.912	95.1207		197.604	94.2425
191.321	92.7746	192.08	92.6565	188.119	95.5118	187.95	95.3679	192.284	95.1278	191.544	95.0912	197.973	94.7123	209.727	93.7384		191.074	92.7283		187.868	95.4495		192.034	95.117		197.725	94.2367
191.445	92.7681	192.201	92.6502	188.243	95.5065	188.074	95.3629	192.41	95.124	191.67	95.0872	198.099	94.7077	209.851	93.7319		191.194	92.7219		187.996	95.4447		192.16	95.1134		197.851	94.2312
191.568	92.7614	192.327	92.6437	188.368	95.5012	188.195	95.3579	192.533	95.1203	191.794	95.0836	198.221	94.7031	209.981	93.7254		191.321	92.7155		188.119	95.4399		192.284	95.1095		197.973	94.2254
191.694	92.7548	192.454	92.6372	188.49	95.4961	188.321	95.3528	192.658	95.1167	191.915	95.0798	198.35	94.6986	210.1	93.7194		191.445	92.7091		188.243	95.4347		192.41	95.1056		198.099	94.2198
191.817	92.7486	192.577	92.6307	188.617	95.4908	188.444	95.3477	192.784	95.1127	192.04	95.0761	198.474	94.6941	210.226	93.7134		191.568	92.7026		188.368	95.4296		192.533	95.1019		198.221	94.2143
191.944	92.7426	192.705	92.6244	188.741	95.4857	188.569	95.3427	192.905	95.1091	192.166	95.0724	198.598	94.6893	210.35	93.7071		191.694	92.696		188.49	95.4245		192.658	95.0982		198.35	94.209
192.068	92.7362	192.825	92.6179	188.865	95.48	188.688	95.3377	193.033	95.1052	192.287	95.0685	198.722	94.6843	210.472	93.7007		191.817	92.6897		188.617	95.4193		192.784	95.0944		198.474	94.2038
192.193	92.7299	192.952	92.6112	188.99	95.4746	188.817	95.3329	193.155	95.1011	192.415	95.0648	198.844	94.6795	210.599	93.6941		191.944	92.6835		188.741	95.4142		192.905	95.0907		198.598	94.1982
192.316	92.7231	193.078	92.6045	189.115	95.4695	188.943	95.3281	193.277	95.0966	192.54	95.0611	198.973	94.675	210.723	93.6875		192.068	92.6771		188.865	95.4089		193.033	95.0868		198.722	94.1925
192.44	92.7164	193.202	92.5979	189.241	95.4647	189.066	95.3235	193.404	95.0926	192.666	95.0572	199.097	94.6699	210.846	93.681		192.193	92.6706		188.99	95.4038		193.155	95.083		198.844	94.1868
192.569	92.7098	193.327	92.5915	189.362	95.4594	189.191	95.3185	193.527	95.0886	192.788	95.0536	199.22	94.6652	210.974	93.6749		192.316	92.6638		189.115	95.3988		193.277	95.0788		198.973	94.1813
192.69	92.7033	193.452	92.5848	189.488	95.4545	189.317	95.3136	193.652	95.0844	192.915	95.0498	199.343	94.6602	211.098	93.6684		192.44	92.6571		189.241	95.3941		193.404	95.0749		199.097	94.1755
192.813	92.6968	193.575	92.5781	189.617	95.4501	189.444	95.3088	193.776	95.0804	193.04	95.0459	199.47	94.6548	211.228	93.6614		192.569	92.6506		189.362	95.389		193.527	95.0711		199.22	94.17
192.936	92.6905	193.7	92.5716	189.739	95.4456	189.563	95.3043	193.903	95.0764	193.164	95.0422	199.592	94.6497	211.349	93.654		192.69	92.644		189.488	95.384		193.652	95.0671		199.343	94.1643
193.065	92.6838	193.825	92.5651	189.864	95.4408	189.689	95.2997	194.025	95.0724	193.286	95.0384	199.714	94.6445	211.474	93.6463		192.813	92.6375		189.617	95.3795		193.776	95.0632		199.47	94.1581
193.186	92.6767	193.95	92.5586	189.986	95.4355	189.814	95.295	194.151	95.0682	193.412	95.0346	199.844	94.6394	211.601	93.639		192.936	92.6311		189.739	95.3749		193.903	95.0593		199.592	94.1519
193.308	92.6697	194.073	92.552	190.112	95.4303	189.936	95.2903	194.275	95.0642	193.535	95.0306	199.966	94.6345	211.725	93.6317		193.065	92.6244		189.864	95.3702		194.025	95.0554		199.714	94.1454
193.433	92.6624	194.202	92.5456	190.235	95.4253	190.066	95.2852	194.397	95.0602	193.66	95.0266	200.089	94.6298	211.85	93.6247		193.186	92.6176		189.986	95.3653		194.151	95.0514		199.844	94.1392
193.561	92.6556	194.324	92.5393	190.361	95.4197	190.186	95.28	194.521	95.0561	193.785	95.0223	200.214	94.6248	211.976	93.6172		193.308	92.6109		190.112	95.3603		194.275	95.0474		199.966	94.1331
193.683	92.6486	194.452	92.5326	190.483	95.4141	190.312	95.2747	194.646	95.0518	193.91	95.0181	200.338	94.6199	212.1	93.6099		193.433	92.604		190.235	95.3553		194.397	95.0434		200.089	94.1272
193.808	92.6417	194.576	92.5259	190.606	95.4084	190.433	95.2696	194.771	95.0479	194.033	95.0139	200.464	94.615	212.223	93.6024		193.561	92.5975		190.361	95.3499		194.521	95.0392		200.214	94.121
193.933	92.6349	194.696	92.5193	190.73	95.4027	190.563	95.2645	194.897	95.0439	194.156	95.0096	200.589	94.6102	212.347	93.595		193.683	92.5906		190.483	95.3444		194.646	95.035		200.338	94.1149
194.056	92.6278	194.821	92.5127	190.857	95.3966	190.684	95.2593	195.019	95.0399	194.281	95.0054	200.712	94.6055	212.475	93.5878		193.808	92.5838		190.606	95.339		194.771	95.0309		200.464	94.1087
194.179	92.6205	194.945	92.506	190.983	95.3906	190.812	95.2539	195.144	95.0356	194.407	95.0009	200.836	94.6005	212.599	93.5808		193.933	92.5771		190.73	95.3336		194.897	95.0267		200.589	94.1026
194.306	92.6136	195.073	92.4991	191.109	95.3844	190.937	95.2486	195.269	95.0314	194.528	94.9966	200.961	94.5956	212.723	93.574		194.056	92.5703		190.857	95.3279		195.019	95.0226		200.712	94.0966
194.43	92.6063	195.193	92.4922	191.233	95.3786	191.06	95.2434	195.391	95.0273	194.651	94.9922	201.087	94.5904	212.847	93.5669		194.179	92.5633		190.983	95.3222		195.144	95.0182		200.836	94.0907
194.553	92.5995	195.321	92.4854	191.357	95.3727	191.185	95.2381	195.516	95.0231	194.778	94.9878	201.21	94.5854	212.967	93.5594		194.306	92.5564		191.109	95.3165		195.269	95.014		200.961	94.0848
194.678	92.5928	195.448	92.4784	191.483	95.3667	191.31	95.233	195.642	95.019	194.903	94.9834	201.334	94.5803	213.095	93.5521		194.43	92.5493		191.233	95.311		195.391	95.0098		201.087	94.0787
194.802	92.5862	195.567	92.4715	191.606	95.3613	191.438	95.2281	195.765	95.015	195.028	94.9792	201.459	94.5751	213.219	93.5454		194.553	92.5424		191.357	95.3054		195.516	95.0054		201.21	94.0724
194.927	92.5794	195.693	92.4646	191.731	95.3557	191.558	95.2231	195.888	95.0107	195.153	94.9745	201.586	94.5698	213.349	93.5383		194.678	92.5356		191.483	95.2998		195.642	95.0012		201.334	94.0662
195.052	92.5725	195.818	92.4575	191.856	95.3504	191.682	95.2181	196.015	95.0064	195.277	94.9701	201.711	94.5644	213.472	93.5313		194.802	92.5288		191.606	95.2947		195.765	94.9971		201.459	94.0603
195.172	92.5656	195.942	92.4505	191.977	95.3452	191.806	95.2129	196.138	95.0019	195.401	94.9659	201.835	94.5589	213.596	93.5241		194.927	92.522		191.731	95.2894		195.888	94.9926		201.586	94.054
195.298	92.5589	196.068	92.4434	192.102	95.3404	191.934	95.2078	196.262	94.9976	195.528	94.9616	201.959	94.5536	213.721	93.517		195.052	92.515		191.856	95.2842		196.015	94.9882		201.711	94.0478
195.421	92.552	196.192	92.4364	192.224	95.3352	192.057	95.2026	196.385	94.9933	195.653	94.9575	202.083	94.5483	213.845	93.5099		195.172	92.508		191.977	95.2791		196.138	94.9839		201.835	94.0415
195.549	92.5451	196.317	92.4294	192.35	95.3303	192.181	95.1972	196.51	94.9891	195.777	94.9535	202.206	94.5432	213.975	93.5028		195.298	92.5012		192.102	95.2741		196.262	94.9796		201.959	94.0353
195.675	92.538	196.438	92.4225	192.474	95.3255	192.305	95.1919	196.635	94.9846	195.903	94.9493	202.332	94.5383	214.097	93.4956		195.421	92.4942		192.224	95.2689		196.385	94.9754		202.083	94.0291
195.797	92.5308	196.568	92.4154	192.601	95.3209	192.43	95.1869	196.762	94.98	196.028	94.9453	202.453	94.5332	214.22	93.4889		195.549	92.4873		192.35	95.2637		196.51	94.9712		202.206	94.023
195.925	92.5234	196.692	92.4084	192.725	95.3166	192.558	95.1818	196.886	94.9753	196.15	94.9412	202.583	94.5278	214.343	93.4813		195.675	92.4803		192.474	95.2587		196.635	94.9669		202.332	94.0169
196.046	92.5156	196.815	92.4013	192.85	95.3116	192.681	95.1762	197.011	94.971	196.275	94.9373	202.704	94.5223	214.473	93.4739		195.797	92.4731		192.601	95.2539		196.762	94.9627		202.453	94.011
196.172	92.508	196.94	92.3943	192.977	95.307	192.805	95.171	197.132	94.9665	196.398	94.9336	202.83	94.5169	214.598	93.4666		195.925	92.4659		192.725	95.2492		196.886	94.9582		202.583	94.0046
196.296	92.5005	197.065	92.3874	193.1	95.3017	192.931	95.1659	197.254	94.9617	196.521	94.9294	202.954	94.5116	214.72	93.4591		196.046	92.4585		192.85	95.2439		197.011	94.9541		202.704	93.9981
196.418	92.4931	197.188	92.3802	193.222	95.2968	193.052	95.1607	197.381	94.9573	196.651	94.9249	203.074	94.5065	214.845	93.4516		196.172	92.4512		192.977	95.239		197.132	94.9501		202.83	93.9918
196.547	92.4854	197.316	92.3729	193.348	95.2913	193.179	95.1556	197.504	94.9529	196.772	94.9206	203.201	94.5011	214.97	93.4439		196.296	92.444		193.1	95.2338		197.254	94.9455		202.954	93.9853
196.672	92.4778	197.439	92.3658	193.473	95.2857	193.306	95.1504	197.63	94.9484	196.894	94.9164	203.327	94.4956	215.095	93.436		196.418	92.4366		193.222	95.2288		197.381	94.9411		203.074	93.979
196.793	92.4702	197.564	92.3586	193.596	95.28	193.428	95.1455	197.754	94.9438	197.017	94.9119	203.452	94.4899	215.219	93.4283		196.547	92.4291		193.348	95.2235		197.504	94.9367		203.201	93.9725
196.916	92.4626	197.691	92.3514	193.72	95.2737	193.553	95.1404	197.879	94.9394	197.144	94.9075	203.576	94.4843	215.345	93.4208		196.672	92.4218		193.473	95.2181		197.63	94.9324		203.327	93.9658
197.042	92.4549	197.821	92.3441	193.843	95.2673	193.68	95.135	198.003	94.9348	197.267	94.9028	203.703	94.4784	215.471	93.4131		196.793	92.4144		193.596	95.2127		197.754	94.9278		203.452	93.9591
197.169	92.447	197.941	92.337	193.969	95.2603	193.803	95.1295	198.128	94.9303	197.39	94.8982	203.826	94.4725	215.596	93.4055		196.916	92.407		193.72	95.207		197.879	94.9234		203.576	93.9526
197.29	92.4395	198.064	92.3298	194.095	95.2538	193.93	95.1244	198.25	94.9255	197.517	94.8935	203.951	94.4669	215.719	93.3977		197.042	92.3995		193.843	95.2011		198.003	94.9188		203.703	93.9457
197.417	92.4324	198.191	92.3227	194.218	95.2472	194.051	95.119	198.376	94.9208	197.641	94.8886	204.075	94.4613	215.843	93.3901		197.169	92.392		193.969	95.1949		198.128	94.9143		203.826	93.939
197.541	92.4252	198.314	92.3155	194.344	95.2408	194.176	95.1135	198.503	94.9167	197.768	94.884	204.197	94.4557	215.97	93.3827		197.29	92.3847		194.095	95.1891		198.25	94.9095		203.951	93.9323
197.664	92.4175	198.437	92.3081	194.464	95.2342	194.303	95.1081	198.623	94.9119	197.889	94.8796	204.324	94.4502	216.092	93.3753		197.417	92.3776		194.218	95.1831		198.376	94.9047		204.075	93.9257
197.788	92.4102	198.563	92.301	194.591	95.228	194.426	95.1023	198.746	94.9067	198.017	94.8746	204.447	94.4448	216.218	93.3676		197.541	92.3703		194.344	95.1771		198.503	94.9003		204.197	93.9192
197.912	92.4027	198.686	92.2936	194.715	95.2222	194.55	95.0972	198.872	94.9019	198.14	94.8698	204.573	94.4396	216.344	93.36		197.664	92.3628		194.464	95.1712		198.623	94.8957		204.324	93.9127
198.036	92.395	198.811	92.2861	194.839	95.2165	194.675	95.0917	198.996	94.8972	198.264	94.8649	204.697	94.4344	216.467	93.3524		197.788	92.3556		194.591	95.1651		198.746	94.8907		204.447	93.9062
198.164	92.3877	198.939	92.2787	194.965	95.2108	194.8	95.0859	199.121	94.8923	198.387	94.8602	204.823	94.4289	216.595	93.3448		197.912	92.3481		194.715	95.1597		198.872	94.8859		204.573	93.8998
198.287	92.3802	199.061	92.2715	195.087	95.2054	194.923	95.0806	199.242	94.8879	198.511	94.8554	204.947	94.4236	216.719	93.3372		198.036	92.3406		194.839	95.1541		198.996	94.881		204.697	93.8934
198.416	92.3731	199.185	92.264	195.211	95.2	195.051	95.0751	199.368	94.8836	198.632	94.8506	205.07	94.4188	216.844	93.3298		198.164	92.3332		194.965	95.1483		199.121	94.8762		204.823	93.8869
198.531	92.3657	199.31	92.2565	195.337	95.1942	195.175	95.0695	199.493	94.8791	198.762	94.8457	205.195	94.4132	216.966	93.3223		198.287	92.3258		195.087	95.143		199.242	94.8717		204.947	93.8804
198.659	92.3577	199.437	92.2487	195.46	95.1885	195.299	95.0643	199.616	94.8745	198.889	94.8407	205.321	94.4075	217.096	93.3145		198.416	92.3185		195.211	95.1375		199.368	94.8671		205.07	93.8743
198.784	92.3497	199.563	92.241	195.586	95.1828	195.424	95.059	199.741	94.8694	199.013	94.8362	205.446	94.4018	217.22	93.3068		198.531	92.3111		195.337	95.1319		199.493	94.8624		205.195	93.8678
198.907	92.342	199.688	92.2336	195.707	95.1771	195.546	95.0535	199.869	94.8645	199.138	94.8315	205.57	94.3958	217.347	93.2995		198.659	92.3032		195.46	95.1264		199.616	94.8577		205.321	93.861
199.037	92.3341	199.814	92.2261	195.833	95.1711	195.668	95.0482	199.994	94.8595	199.26	94.8272	205.696	94.3899	217.469	93.292		198.784	92.2953		195.586	95.1209		199.741	94.8528		205.446	93.8543
199.159	92.3262	199.936	92.2186	195.961	95.1648	195.794	95.0428	200.115	94.8545	199.387	94.8224	205.822	94.3836	217.595	93.2844		198.907	92.2878		195.707	95.1153		199.869	94.848		205.57	93.8476
199.282	92.3183	200.061	92.211	196.081	95.1588	195.918	95.0374	200.238	94.8498	199.51	94.8177	205.948	94.3776	217.721	93.2764		199.037	92.2801		195.833	95.1097		199.994	94.8434		205.696	93.8409
199.406	92.3104	200.188	92.2032	196.208	95.1533	196.041	95.0321	200.366	94.845	199.634	94.813	206.069	94.3719	217.844	93.2683		199.159	92.2724		195.961	95.1038		200.115	94.8384		205.822	93.834
199.527	92.3024	200.31	92.1954	196.331	95.1477	196.164	95.0267	200.488	94.8401	199.761	94.8084	206.192	94.3662	217.969	93.2605		199.282	92.2646		196.081	95.0981		200.238	94.8338		205.948	93.827
199.656	92.2942	200.436	92.1876	196.458	95.142	196.286	95.0214	200.617	94.8351	199.883	94.8036	206.316	94.36	218.094	93.2527		199.406	92.2568		196.208	95.0927		200.366	94.829		206.069	93.8201
199.78	92.2859	200.56	92.18	196.582	95.1365	196.416	95.0158	200.74	94.8301	200.007	94.7988	206.443	94.3543	218.214	93.2444		199.527	92.2489		196.331	95.0872		200.488	94.8243		206.192	93.8133
199.905	92.278	200.684	92.1723	196.709	95.1305	196.542	95.0101	200.865	94.825	200.131	94.7942	206.568	94.3489	218.343	93.2363		199.656	92.2409		196.458	95.0817		200.617	94.8194		206.316	93.8063
200.03	92.2698	200.812	92.1646	196.831	95.1243	196.666	95.0043	200.984	94.8202	200.259	94.7892	206.692	94.3432	218.467	93.2283		199.78	92.233		196.582	95.0761		200.74	94.8144		206.443	93.7994
200.156	92.2621	200.934	92.1568	196.96	95.1181	196.79	94.9985	201.113	94.8155	200.382	94.7843	206.817	94.3375	218.595	93.2199		199.905	92.2252		196.709	95.0703		200.865	94.8096		206.568	93.7926
200.28	92.2538	201.054	92.1489	197.082	95.1119	196.912	94.9929	201.235	94.8108	200.505	94.7792	206.943	94.3317	218.716	93.2119		200.03	92.2172		196.831	95.0643		200.984	94.8047		206.692	93.7858
200.403	92.2456	201.183	92.141	197.205	95.1057	197.04	94.987	201.361	94.8061	200.631	94.7745	207.071	94.3261	218.844	93.2038		200.156	92.2094		196.96	95.0583		201.113	94.7999		206.817	93.7787
200.53	92.2376	201.306	92.1332	197.331	95.0993	197.163	94.981	201.485	94.8009	200.755	94.7697	207.192	94.3203	218.969	93.1958		200.28	92.2014		197.082	95.0524		201.235	94.795		206.943	93.7718
200.656	92.2296	201.433	92.1257	197.455	95.0925	197.292	94.9755	201.613	94.7959	200.881	94.7645	207.316	94.314	219.094	93.1875		200.403	92.1933		197.205	95.0463		201.361	94.7903		207.071	93.7649
200.78	92.2214	201.559	92.1177	197.581	95.0857	197.411	94.9698	201.735	94.7907	201.006	94.7593	207.443	94.308	219.218	93.179		200.53	92.1854		197.331	95.0402		201.485	94.7853		207.192	93.7581
200.902	92.2134	201.682	92.11	197.702	95.0794	197.536	94.9639	201.862	94.7852	201.129	94.7544	207.567	94.3019	219.343	93.1704		200.656	92.1776		197.455	95.034		201.613	94.7802		207.316	93.7508
201.026	92.2055	201.806	92.1021	197.826	95.0726	197.663	94.9585	201.984	94.7799	201.254	94.7495	207.69	94.2958	219.464	93.162		200.78	92.1696		197.581	95.0277		201.735	94.775		207.443	93.7435
201.152	92.1972	201.93	92.0942	197.95	95.0664	197.787	94.9531	202.114	94.7747	201.378	94.7446	207.815	94.2894	219.593	93.1535		200.902	92.1617		197.702	95.0216		201.862	94.7698		207.567	93.7362
201.276	92.189	202.057	92.0862	198.075	95.0604	197.911	94.9474	202.238	94.7697	201.502	94.7397	207.943	94.2831	219.716	93.145		201.026	92.1538		197.826	95.0156		201.984	94.7647		207.69	93.7289
201.4	92.1805	202.178	92.0782	198.201	95.0544	198.034	94.9418	202.356	94.7646	201.624	94.7346	208.066	94.2769	219.841	93.1365		201.152	92.1457		197.95	95.0097		202.114	94.7597		207.815	93.7214
201.523	92.1723	202.305	92.0704	198.327	95.0489	198.157	94.9363	202.482	94.7594	201.754	94.7294	208.188	94.2703	219.965	93.1278		201.276	92.1376		198.075	95.0039		202.238	94.7547		207.943	93.714
201.648	92.1641	202.43	92.0625	198.448	95.0432	198.281	94.9306	202.608	94.7542	201.877	94.7241	208.316	94.2636	220.092	93.1194		201.4	92.1294		198.201	94.9981		202.356	94.7496		208.066	93.7067
201.773	92.1558	202.558	92.0544	198.572	95.0372	198.408	94.9252	202.732	94.7492	202.003	94.7189	208.438	94.2573	220.214	93.1111		201.523	92.1213		198.327	94.9926		202.482	94.7444		208.188	93.699
201.902	92.1473	202.679	92.0463	198.697	95.0314	198.532	94.9193	202.861	94.744	202.125	94.7137	208.566	94.2512	220.341	93.1033		201.648	92.1133		198.448	94.9869		202.608	94.7391		208.316	93.6915
202.024	92.1391	202.805	92.0383	198.823	95.0257	198.655	94.9131	202.983	94.7387	202.253	94.7086	208.689	94.2454	220.464	93.0951		201.773	92.1051		198.572	94.9812		202.732	94.7341		208.438	93.6842
202.149	92.1311	202.929	92.03	198.946	95.0199	198.787	94.9073	203.106	94.7333	202.378	94.7032	208.813	94.2393	220.59	93.0867		201.902	92.0968		198.697	94.9753		202.861	94.7288		208.566	93.6773
202.275	92.1228	203.057	92.0219	199.069	95.0144	198.909	94.9014	203.229	94.7282	202.504	94.698	208.939	94.2332	220.716	93.0786		202.024	92.0887		198.823	94.9694		202.983	94.7236		208.689	93.6703
202.398	92.1148	203.178	92.0137	199.194	95.0087	199.032	94.8953	203.357	94.7229	202.624	94.6927	209.063	94.2272	220.84	93.0702		202.149	92.0806		198.946	94.9636		203.106	94.7182		208.813	93.663
202.522	92.1068	203.303	92.0057	199.317	95.0029	199.157	94.8895	203.481	94.7176	202.752	94.6876	209.186	94.221	220.965	93.0617		202.275	92.0723		199.069	94.9579		203.229	94.7131		208.939	93.6559
202.647	92.0984	203.427	91.9974	199.443	94.9966	199.281	94.8835	203.607	94.7122	202.88	94.6825	209.312	94.2148	221.087	93.0531		202.398	92.0642		199.194	94.952		203.357	94.7078		209.063	93.6487
202.773	92.09	203.555	91.9892	199.567	94.9901	199.405	94.8776	203.731	94.707	203.001	94.6774	209.434	94.2089	221.215	93.0448		202.522	92.0563		199.317	94.9462		203.481	94.7026		209.186	93.6414
202.894	92.0812	203.677	91.981	199.696	94.9836	199.531	94.8718	203.856	94.7014	203.126	94.6724	209.563	94.2029	221.337	93.0361		202.647	92.0479		199.443	94.9401		203.607	94.6974		209.312	93.634
203.018	92.0724	203.801	91.9727	199.814	94.9776	199.655	94.8658	203.978	94.6958	203.25	94.667	209.686	94.1965	221.462	93.0274		202.773	92.0396		199.567	94.9338		203.731	94.6922		209.434	93.6268
203.143	92.0639	203.927	91.9644	199.941	94.9712	199.779	94.8599	204.103	94.6905	203.375	94.662	209.815	94.1901	221.585	93.0184		202.894	92.0311		199.696	94.9277		203.856	94.6869		209.563	93.6195
203.268	92.0554	204.052	91.9561	200.065	94.9644	199.904	94.854	204.225	94.6853	203.5	94.6569	209.936	94.1834	221.712	93.0099		203.018	92.0226		199.814	94.9217		203.978	94.6814		209.686	93.612
203.391	92.0465	204.177	91.9478	200.191	94.9578	200.026	94.8482	204.352	94.6803	203.624	94.6519	210.059	94.177	221.84	93.0016		203.143	92.0142		199.941	94.9156		204.103	94.6763		209.815	93.6042
203.518	92.0379	204.301	91.9396	200.32	94.9511	200.152	94.8424	204.475	94.6747	203.75	94.6465	210.186	94.1706	221.96	92.9933		203.268	92.0058		200.065	94.9092		204.225	94.6711		209.936	93.5966
203.643	92.0288	204.426	91.9314	200.444	94.9446	200.279	94.8367	204.601	94.6693	203.875	94.6412	210.311	94.1642	222.087	92.9844		203.391	91.9972		200.191	94.903		204.352	94.6661		210.059	93.5893
203.767	92.0198	204.549	91.923	200.567	94.9384	200.403	94.8307	204.726	94.6639	203.995	94.6356	210.435	94.1579	222.21	92.9756		203.518	91.9887		200.32	94.8967		204.475	94.6606		210.186	93.5819
203.893	92.0108	204.678	91.9147	200.687	94.9322	200.528	94.8247	204.851	94.6587	204.128	94.6301	210.56	94.1514	222.335	92.967		203.643	91.9801		200.444	94.8907		204.601	94.6552		210.311	93.5743
204.019	92.0018	204.802	91.9062	200.816	94.926	200.652	94.8185	204.974	94.6533	204.246	94.6248	210.686	94.145	222.464	92.9584		203.767	91.9714		200.567	94.8845		204.726	94.6498		210.435	93.5667
204.144	91.9932	204.926	91.8978	200.939	94.9202	200.776	94.8126	205.103	94.6481	204.372	94.6194	210.81	94.1388	222.588	92.9495		203.893	91.9627		200.687	94.8784		204.851	94.6444		210.56	93.5592
204.267	91.9847	205.051	91.8896	201.066	94.9141	200.905	94.8066	205.226	94.643	204.5	94.6141	210.935	94.1326	222.712	92.9406		204.019	91.954		200.816	94.8722		204.974	94.639		210.686	93.5517
204.388	91.9757	205.177	91.8812	201.19	94.9083	201.021	94.8006	205.35	94.6375	204.623	94.6084	211.058	94.1262	222.835	92.9319		204.144	91.9455		200.939	94.8664		205.103	94.6337		210.81	93.5442
204.517	91.9668	205.3	91.8727	201.315	94.9024	201.148	94.7944	205.473	94.6318	204.748	94.6029	211.182	94.1196	222.96	92.923		204.267	91.9371		201.066	94.8603		205.226	94.6285		210.935	93.5366
204.641	91.9581	205.426	91.8641	201.441	94.8963	201.269	94.7882	205.601	94.6264	204.873	94.5975	211.306	94.1133	223.087	92.9142		204.388	91.9285		201.19	94.8545		205.35	94.623		211.058	93.529
204.766	91.9488	205.548	91.8552	201.565	94.8901	201.398	94.782	205.725	94.6211	205	94.5921	211.436	94.1067	223.208	92.9054		204.517	91.9197		201.315	94.8484		205.473	94.6174		211.182	93.5213
204.89	91.9396	205.676	91.8466	201.69	94.8838	201.525	94.7759	205.846	94.6156	205.121	94.5866	211.556	94.1005	223.334	92.8968		204.641	91.9111		201.441	94.8422		205.601	94.6119		211.306	93.5137
205.014	91.9303	205.8	91.838	201.816	94.8774	201.649	94.7697	205.975	94.6099	205.247	94.5813	211.681	94.0941	223.458	92.8883		204.766	91.902		201.565	94.8361		205.725	94.6066		211.436	93.506
205.137	91.9214	205.925	91.8294	201.942	94.8713	201.773	94.7636	206.096	94.6039	205.37	94.5759	211.806	94.0876	223.583	92.8796		204.89	91.8931		201.69	94.8298		205.846	94.6011		211.556	93.4987
205.266	91.9123	206.053	91.8208	202.064	94.8649	201.899	94.7576	206.221	94.5981	205.495	94.5702	211.935	94.0814	223.709	92.8707		205.014	91.8841		201.816	94.8235		205.975	94.5956		211.681	93.4912
205.39	91.9033	206.176	91.8121	202.189	94.8583	202.024	94.7512	206.347	94.5923	205.624	94.5647	212.057	94.0745	223.835	92.8621		205.137	91.8754		201.942	94.8174		206.096	94.5899		211.806	93.4836
205.512	91.894	206.301	91.8032	202.312	94.852	202.146	94.7453	206.47	94.5863	205.745	94.559	212.178	94.0674	223.958	92.8534		205.266	91.8666		202.064	94.8112		206.221	94.5841		211.935	93.4761
205.638	91.8851	206.426	91.7944	202.438	94.8456	202.273	94.7397	206.594	94.5803	205.87	94.5535	212.304	94.0604	224.078	92.8446		205.39	91.8577		202.189	94.8047		206.347	94.5785		212.057	93.4683
205.764	91.8761	206.55	91.7856	202.561	94.8386	202.397	94.734	206.72	94.5747	205.991	94.5479	212.429	94.0536	224.208	92.8355		205.512	91.8486		202.312	94.7986		206.47	94.5727		212.178	93.4604
205.888	91.8664	206.672	91.7771	202.682	94.8315	202.521	94.7278	206.844	94.5686	206.115	94.5422	212.554	94.0464	224.331	92.8263		205.638	91.8398		202.438	94.7926		206.594	94.5669		212.304	93.4525
206.012	91.8572	206.797	91.7684	202.81	94.8246	202.648	94.7217	206.968	94.5626	206.242	94.5364	212.68	94.0395	224.461	92.8173		205.764	91.8308		202.561	94.7863		206.72	94.5613		212.429	93.4445
206.134	91.8482	206.921	91.7594	202.933	94.8176	202.772	94.7155	207.094	94.5565	206.365	94.5306	212.804	94.0322	224.584	92.8079		205.888	91.8217		202.682	94.7797		206.844	94.5554		212.554	93.4364
206.26	91.8392	207.045	91.7505	203.057	94.8106	202.895	94.7096	207.222	94.5504	206.493	94.5248	212.93	94.0251	224.708	92.7984		206.012	91.8128		202.81	94.7731		206.968	94.5495		212.68	93.4284
206.383	91.8303	207.171	91.7415	203.183	94.8038	203.018	94.7038	207.346	94.5444	206.615	94.5189	213.051	94.0182	224.833	92.7891		206.134	91.8038		202.933	94.7666		207.094	94.5435		212.804	93.4201
206.506	91.8212	207.297	91.7323	203.31	94.7973	203.143	94.6982	207.473	94.5386	206.742	94.5132	213.179	94.0109	224.962	92.7794		206.26	91.7949		203.057	94.7601		207.222	94.5376		212.93	93.4117
206.633	91.812	207.423	91.7232	203.433	94.7907	203.271	94.6926	207.596	94.5326	206.867	94.5074	213.305	94.0041	225.084	92.77		206.383	91.7859		203.183	94.7538		207.346	94.5317		213.051	93.4036
206.76	91.8024	207.548	91.7143	203.556	94.784	203.396	94.6868	207.721	94.5269	206.99	94.5017	213.43	93.9976	225.209	92.7608		206.506	91.7767		203.31	94.7478		207.473	94.5259		213.179	93.3951
206.885	91.7928	207.671	91.7053	203.683	94.7775	203.522	94.6808	207.844	94.5212	207.115	94.4959	213.556	93.9913	225.332	92.7516		206.633	91.7676		203.433	94.7416		207.596	94.52		213.305	93.387
207.009	91.7831	207.796	91.6966	203.807	94.7712	203.645	94.6746	207.968	94.5153	207.241	94.49	213.681	93.9846	225.458	92.7424		206.76	91.7584		203.556	94.7354		207.721	94.5143		213.43	93.3792
207.134	91.7737	207.92	91.6874	203.93	94.7655	203.769	94.6685	208.094	94.5098	207.37	94.4841	213.806	93.9779	225.581	92.733		206.885	91.749		203.683	94.7291		207.844	94.5086		213.556	93.3714
207.26	91.7643	208.044	91.6782	204.054	94.7595	203.895	94.6626	208.216	94.5041	207.494	94.4784	213.932	93.971	225.704	92.7234		207.009	91.7398		203.807	94.7229		207.968	94.5027		213.681	93.3635
207.385	91.7551	208.169	91.6693	204.181	94.7536	204.018	94.6565	208.343	94.4983	207.62	94.4727	214.057	93.9643	225.831	92.7144		207.134	91.7306		203.93	94.717		208.094	94.4969		213.806	93.3554
207.51	91.7456	208.295	91.6603	204.306	94.7475	204.142	94.6502	208.469	94.4925	207.741	94.4666	214.181	93.9576	225.953	92.7055		207.26	91.7212		204.054	94.7111		208.216	94.4913		213.932	93.3472
207.635	91.7361	208.419	91.6512	204.426	94.741	204.267	94.6443	208.593	94.487	207.867	94.4606	214.305	93.9505	226.079	92.6964		207.385	91.7122		204.181	94.705		208.343	94.4855		214.057	93.3393
207.758	91.7265	208.542	91.6426	204.555	94.7342	204.389	94.6382	208.715	94.4812	207.991	94.4546	214.426	93.9434	226.208	92.6873		207.51	91.703		204.306	94.6989		208.469	94.4796		214.181	93.3315
207.88	91.7169	208.668	91.6337	204.677	94.7274	204.518	94.6322	208.844	94.4755	208.117	94.4486	214.554	93.9364	226.331	92.6781		207.635	91.6936		204.426	94.6927		208.593	94.4738		214.305	93.3235
208.006	91.7077	208.79	91.6246	204.803	94.7207	204.638	94.6261	208.971	94.4697	208.245	94.4424	214.674	93.9291	226.458	92.6687		207.758	91.6845		204.555	94.6862		208.715	94.4679		214.426	93.3153
208.134	91.6981	208.919	91.6155	204.927	94.7139	204.765	94.6197	209.093	94.4639	208.368	94.4362	214.806	93.9217	226.581	92.6592		207.88	91.6753		204.677	94.6798		208.844	94.462		214.554	93.3073
208.256	91.6887	209.041	91.6063	205.052	94.708	204.892	94.6139	209.215	94.458	208.492	94.4301	214.929	93.9144	226.705	92.6495		208.006	91.6661		204.803	94.6734		208.971	94.456		214.674	93.2989
208.384	91.6793	209.166	91.5974	205.175	94.7014	205.012	94.6083	209.342	94.4515	208.617	94.424	215.054	93.9074	226.829	92.6402		208.134	91.6568		204.927	94.6668		209.093	94.4501		214.806	93.2904
208.508	91.6701	209.292	91.5883	205.301	94.695	205.139	94.6022	209.467	94.4453	208.742	94.4179	215.18	93.9002	226.955	92.6311		208.256	91.6475		205.052	94.6609		209.215	94.444		214.929	93.282
208.632	91.6602	209.414	91.579	205.427	94.6883	205.265	94.5965	209.59	94.4392	208.868	94.4116	215.301	93.8931	227.08	92.6216		208.384	91.6384		205.175	94.6549		209.342	94.4378		215.054	93.2738
208.756	91.6504	209.543	91.5697	205.549	94.6823	205.388	94.5908	209.718	94.4331	208.993	94.4054	215.427	93.8859	227.203	92.6119		208.508	91.6292		205.301	94.6486		209.467	94.4316		215.18	93.2656
208.881	91.6405	209.67	91.5605	205.674	94.6758	205.513	94.5847	209.838	94.4268	209.117	94.3995	215.551	93.8785	227.325	92.6019		208.632	91.6196		205.427	94.6424		209.59	94.4254		215.301	93.2573
209.005	91.6307	209.793	91.5509	205.8	94.6693	205.637	94.5786	209.961	94.4207	209.239	94.3935	215.679	93.8714	227.453	92.5922		208.756	91.61		205.549	94.6365		209.718	94.4193		215.427	93.2489
209.133	91.6205	209.918	91.5416	205.921	94.6631	205.763	94.5725	210.086	94.4143	209.368	94.3876	215.802	93.8646	227.577	92.5821		208.881	91.6005		205.674	94.6303		209.838	94.4131		215.551	93.2402
209.255	91.6104	210.044	91.5322	206.048	94.6568	205.887	94.5662	210.213	94.4078	209.492	94.3818	215.929	93.8576	227.701	92.5723		209.005	91.5908		205.8	94.624		209.961	94.4071		215.679	93.2318
209.38	91.6005	210.167	91.5229	206.171	94.6505	206.013	94.5604	210.338	94.4013	209.615	94.3758	216.055	93.8508	227.824	92.5622		209.133	91.581		205.921	94.6178		210.086	94.401		215.802	93.2233
209.505	91.5905	210.293	91.5131	206.299	94.6441	206.138	94.5543	210.464	94.3949	209.742	94.3699	216.178	93.8435	227.947	92.5524		209.255	91.5713		206.048	94.6115		210.213	94.3948		215.929	93.2149
209.628	91.5806	210.418	91.5033	206.422	94.6374	206.264	94.548	210.588	94.3891	209.869	94.3637	216.303	93.8361	228.072	92.5423		209.38	91.5617		206.171	94.6054		210.338	94.3886		216.055	93.2065
209.755	91.571	210.538	91.4936	206.548	94.6308	206.388	94.5421	210.711	94.3829	209.991	94.3576	216.427	93.8292	228.198	92.532		209.505	91.5518		206.299	94.5992		210.464	94.3824		216.178	93.198
209.876	91.5613	210.666	91.4839	206.672	94.6244	206.512	94.5361	210.835	94.377	210.117	94.3516	216.549	93.8219	228.322	92.5219		209.628	91.542		206.422	94.5927		210.588	94.3764		216.303	93.1892
210.005	91.5516	210.79	91.4742	206.794	94.6176	206.638	94.5302	210.959	94.3709	210.243	94.3457	216.678	93.8142	228.445	92.5118		209.755	91.5323		206.548	94.5864		210.711	94.3703		216.427	93.1806
210.129	91.5419	210.919	91.4644	206.918	94.6113	206.763	94.5243	211.089	94.3643	210.367	94.3395	216.8	93.8066	228.574	92.5021		209.876	91.5226		206.672	94.5802		210.835	94.3643		216.549	93.1719
210.256	91.5321	211.044	91.4547	207.043	94.605	206.891	94.5182	211.213	94.3583	210.489	94.3331	216.928	93.7993	228.699	92.4927		210.005	91.5129		206.794	94.5739		210.959	94.3583		216.678	93.163
210.379	91.5226	211.168	91.4449	207.167	94.5981	207.014	94.512	211.337	94.3523	210.618	94.3266	217.054	93.7916	228.821	92.483		210.129	91.5032		206.918	94.5678		211.089	94.3519		216.8	93.1544
210.504	91.5129	211.295	91.4351	207.292	94.5915	207.139	94.5061	211.462	94.3459	210.743	94.32	217.177	93.7839	228.947	92.4738		210.256	91.4934		207.043	94.5616		211.213	94.3457		216.928	93.146
210.63	91.5028	211.422	91.4253	207.419	94.5849	207.26	94.4997	211.588	94.3395	210.869	94.3138	217.304	93.7767	229.07	92.4643		210.379	91.4838		207.167	94.5551		211.337	94.3394		217.054	93.1373
210.756	91.4927	211.545	91.4157	207.54	94.5779	207.386	94.4934	211.708	94.3332	210.991	94.3074	217.427	93.7693	229.194	92.4548		210.504	91.474		207.292	94.5488		211.462	94.3329		217.177	93.1288
210.876	91.4824	211.666	91.4059	207.668	94.5715	207.512	94.4874	211.837	94.3267	211.115	94.301	217.554	93.7621	229.32	92.4457		210.63	91.4641		207.419	94.5423		211.588	94.3266		217.304	93.1205
211.004	91.4718	211.793	91.3962	207.793	94.5646	207.634	94.4811	211.96	94.3204	211.242	94.2947	217.677	93.7542	229.446	92.4363		210.756	91.4542		207.54	94.5357		211.708	94.3203		217.427	93.112
211.127	91.4614	211.918	91.3866	207.918	94.5576	207.763	94.4744	212.086	94.3138	211.366	94.2883	217.799	93.7465	229.57	92.4265		210.876	91.4441		207.668	94.5295		211.837	94.3138		217.554	93.1039
211.253	91.451	212.044	91.3768	208.043	94.5507	207.884	94.4677	212.211	94.3074	211.491	94.2818	217.925	93.7394	229.691	92.4168		211.004	91.434		207.793	94.5228		211.96	94.3075		217.677	93.0952
211.381	91.4405	212.164	91.3672	208.165	94.5439	208.01	94.4613	212.335	94.3015	211.618	94.275	218.051	93.7322	229.818	92.4071		211.127	91.424		207.918	94.516		212.086	94.3011		217.799	93.0865
211.506	91.4301	212.296	91.3573	208.292	94.5372	208.137	94.455	212.465	94.2947	211.741	94.2686	218.176	93.7247	229.944	92.3972		211.253	91.4139		208.043	94.5092		212.211	94.2946		217.925	93.0781
211.629	91.4193	212.42	91.3473	208.412	94.5313	208.261	94.4489	212.586	94.288	211.864	94.262	218.298	93.7169	230.065	92.3873		211.381	91.4038		208.165	94.5026		212.335	94.2882		218.051	93.0696
211.753	91.4087	212.547	91.3374	208.537	94.5247	208.383	94.4425	212.712	94.2816	211.99	94.2555	218.426	93.7093	230.19	92.3769		211.506	91.3937		208.292	94.4961		212.465	94.2816		218.176	93.0609
211.88	91.3981	212.67	91.3273	208.661	94.5186	208.507	94.4364	212.832	94.275	212.114	94.2488	218.551	93.701	230.318	92.3668		211.629	91.3833		208.412	94.4901		212.586	94.275		218.298	93.0521
212.002	91.3874	212.798	91.3172	208.786	94.5124	208.633	94.4303	212.962	94.2684	212.239	94.2423	218.676	93.6929	230.44	92.3565		211.753	91.373		208.537	94.4836		212.712	94.2686		218.426	93.0431
212.127	91.3768	212.918	91.3072	208.914	94.5063	208.758	94.4239	213.084	94.2619	212.363	94.2359	218.802	93.6848	230.563	92.3461		211.88	91.3627		208.661	94.4775		212.832	94.2619		218.551	93.0339
212.251	91.3659	213.045	91.2972	209.038	94.5001	208.884	94.4177	213.211	94.2549	212.487	94.2293	218.926	93.6769	230.687	92.3354		212.002	91.3523		208.786	94.4714		212.962	94.2553		218.676	93.0247
212.376	91.3553	213.169	91.2869	209.164	94.4937	209.008	94.4117	213.336	94.2482	212.611	94.2228	219.051	93.6691	230.814	92.3253		212.127	91.342		208.914	94.4651		213.084	94.2489		218.802	93.0154
212.504	91.3446	213.292	91.2769	209.285	94.4879	209.13	94.4054	213.46	94.2414	212.736	94.2163	219.175	93.6612	230.939	92.3148		212.251	91.3315		209.038	94.4589		213.211	94.2421		218.926	93.0062
212.627	91.3337	213.422	91.2665	209.411	94.4818	209.258	94.399	213.585	94.2349	212.861	94.2099	219.304	93.6537	231.062	92.3039		212.376	91.3211		209.164	94.4527		213.336	94.2355		219.051	92.9972
212.751	91.3228	213.544	91.2563	209.535	94.4757	209.381	94.3926	213.711	94.2282	212.989	94.2033	219.426	93.6458	231.189	92.2935		212.504	91.3107		209.285	94.4466		213.46	94.2288		219.175	92.988
212.873	91.3119	213.669	91.246	209.662	94.469	209.507	94.3862	213.837	94.2218	213.113	94.1969	219.55	93.6383	231.315	92.2831		212.627	91.3001		209.411	94.4404		213.585	94.2224		219.304	92.9788
213.001	91.3007	213.794	91.2357	209.787	94.4625	209.633	94.3799	213.958	94.2154	213.241	94.1905	219.678	93.6308	231.438	92.2724		212.751	91.2896		209.535	94.4341		213.711	94.2158		219.426	92.9697
213.127	91.2898	213.917	91.2255	209.912	94.4557	209.754	94.3739	214.083	94.209	213.366	94.184	219.801	93.6234	231.562	92.2618		212.873	91.2789		209.662	94.4276		213.837	94.2093		219.55	92.9607
213.249	91.279	214.043	91.2154	210.035	94.4488	209.88	94.3679	214.209	94.2022	213.489	94.1773	219.927	93.6155	231.683	92.2519		213.001	91.2682		209.787	94.4212		213.958	94.203		219.678	92.9516
213.376	91.2685	214.166	91.2049	210.16	94.4418	210.009	94.362	214.333	94.1951	213.615	94.1706	220.049	93.6077	231.813	92.2415		213.127	91.2577		209.912	94.4148		214.083	94.1965		219.801	92.9426
213.501	91.2579	214.293	91.1944	210.284	94.4354	210.131	94.356	214.455	94.1882	213.74	94.1639	220.175	93.5998	231.937	92.2314		213.249	91.2472		210.035	94.4084		214.209	94.1897		219.927	92.9337
213.625	91.2469	214.42	91.1841	210.407	94.4289	210.255	94.3501	214.583	94.1811	213.868	94.157	220.301	93.5921	232.064	92.2211		213.376	91.2367		210.16	94.4019		214.333	94.1829		220.049	92.9246
213.751	91.2361	214.543	91.1738	210.536	94.422	210.383	94.3445	214.705	94.1744	213.991	94.1503	220.422	93.584	232.186	92.2112		213.501	91.2261		210.284	94.3957		214.455	94.176		220.175	92.9156
213.873	91.2254	214.669	91.1634	210.66	94.415	210.508	94.3386	214.833	94.167	214.114	94.1436	220.551	93.5755	232.309	92.201		213.625	91.2155		210.407	94.3895		214.583	94.169		220.301	92.9066
214.001	91.2147	214.794	91.153	210.782	94.4081	210.632	94.3326	214.954	94.1597	214.236	94.1368	220.674	93.5669	232.436	92.1903		213.751	91.2049		210.536	94.3833		214.705	94.1623		220.422	92.8976
214.126	91.2042	214.921	91.1425	210.905	94.4018	210.757	94.3267	215.082	94.1525	214.36	94.13	220.802	93.5585	232.56	92.1798		213.873	91.1944		210.66	94.3768		214.833	94.1553		220.551	92.8882
214.248	91.1935	215.047	91.132	211.034	94.3953	210.883	94.3204	215.208	94.1452	214.489	94.1231	220.927	93.5502	232.687	92.1695		214.001	91.1838		210.782	94.3704		214.954	94.1482		220.674	92.8786
214.376	91.1827	215.168	91.1214	211.157	94.3887	211.006	94.3141	215.335	94.1381	214.612	94.1162	221.05	93.5422	232.808	92.1591		214.126	91.1733		210.905	94.3642		215.082	94.1413		220.802	92.8691
214.502	91.1719	215.296	91.1106	211.283	94.3822	211.13	94.3079	215.458	94.1312	214.739	94.1092	221.175	93.5345	232.936	92.148		214.248	91.1628		211.034	94.3578		215.208	94.1341		220.927	92.8598
214.627	91.1605	215.421	91.0998	211.408	94.376	211.256	94.3017	215.583	94.1245	214.861	94.1022	221.301	93.5267	233.055	92.137		214.376	91.1521		211.157	94.3514		215.335	94.1271		221.05	92.8507
214.753	91.1493	215.544	91.089	211.532	94.3695	211.383	94.2956	215.709	94.1177	214.989	94.0953	221.424	93.5188	233.183	92.1262		214.502	91.1412		211.283	94.3451		215.458	94.1202		221.175	92.8413
214.874	91.1378	215.669	91.0783	211.655	94.3631	211.505	94.2889	215.834	94.1111	215.114	94.0882	221.547	93.5104	233.307	92.1157		214.627	91.1302		211.408	94.3388		215.583	94.1134		221.301	92.8319
214.998	91.126	215.794	91.0674	211.779	94.3567	211.631	94.282	215.955	94.1038	215.239	94.0812	221.674	93.5023	233.427	92.1047		214.753	91.1191		211.532	94.3325		215.709	94.1065		221.424	92.8225
215.127	91.1145	215.921	91.0566	211.905	94.3505	211.753	94.2753	216.082	94.0971	215.366	94.0741	221.8	93.4943	233.556	92.0941		214.874	91.1081		211.655	94.326		215.834	94.0996		221.547	92.8131
215.254	91.103	216.041	91.0456	212.036	94.3446	211.879	94.2689	216.206	94.0907	215.487	94.0672	221.924	93.4863	233.68	92.0835		214.998	91.0967		211.779	94.3194		215.955	94.0925		221.674	92.8035
215.376	91.0916	216.169	91.0346	212.158	94.3384	212.005	94.2627	216.33	94.0838	215.617	94.0601	222.051	93.4779	233.804	92.0728		215.127	91.0855		211.905	94.3129		216.082	94.0856		221.8	92.7942
215.498	91.0806	216.291	91.0236	212.283	94.3322	212.129	94.2566	216.455	94.0766	215.739	94.0528	222.17	93.4695	233.927	92.0622		215.254	91.0743		212.036	94.3068		216.206	94.079		221.924	92.7849
215.619	91.0692	216.419	91.0123	212.411	94.3261	212.253	94.2502	216.58	94.0692	215.862	94.0457	222.298	93.4607	234.052	92.0513		215.376	91.0631		212.158	94.3005		216.33	94.0719		222.051	92.7754
215.751	91.0577	216.544	91.0011	212.531	94.3198	212.38	94.2441	216.705	94.0618	215.988	94.0386	222.423	93.452	234.178	92.0404		215.498	91.0521		212.283	94.2944		216.455	94.0647		222.17	92.7659
215.874	91.0462	216.671	90.9903	212.659	94.3132	212.504	94.2378	216.827	94.0546	216.114	94.0315	222.55	93.4433	234.299	92.0296		215.619	91.0407		212.411	94.2882		216.58	94.0575		222.298	92.756
215.996	91.0348	216.799	90.9793	212.783	94.3067	212.63	94.2314	216.953	94.0476	216.238	94.0243	222.674	93.4347	234.425	92.0186		215.751	91.0294		212.531	94.2819		216.705	94.0502		222.423	92.7462
216.122	91.0233	216.921	90.9682	212.907	94.3002	212.755	94.2253	217.08	94.0405	216.365	94.0172	222.798	93.4263	234.547	92.0074		215.874	91.0182		212.659	94.2755		216.827	94.043		222.55	92.7365
216.247	91.0122	217.046	90.9571	213.031	94.2938	212.881	94.2195	217.204	94.0333	216.486	94.0099	222.925	93.4178	234.674	91.9963		215.996	91.0071		212.783	94.269		216.953	94.0359		222.674	92.7266
216.373	91.0008	217.174	90.9461	213.156	94.287	213.003	94.2136	217.327	94.0261	216.611	94.0026	223.049	93.409	234.798	91.9854		216.122	90.9958		212.907	94.2628		217.08	94.0288		222.798	92.7168
216.5	90.989	217.297	90.9349	213.283	94.2798	213.13	94.2077	217.451	94.0186	216.737	93.9953	223.173	93.4006	234.92	91.9745		216.247	90.9846		213.031	94.2566		217.204	94.0216		222.925	92.7071
216.622	90.9774	217.422	90.9239	213.403	94.2728	213.251	94.2017	217.577	94.0113	216.859	93.9881	223.297	93.3923	235.045	91.9634		216.373	90.9734		213.156	94.2503		217.327	94.0144		223.049	92.6972
216.747	90.9652	217.546	90.913	213.528	94.2657	213.379	94.1954	217.701	94.0041	216.985	93.981	223.423	93.384	235.174	91.9521		216.5	90.962		213.283	94.2438		217.451	94.007		223.173	92.6875
216.873	90.9534	217.67	90.9021	213.654	94.2587	213.506	94.1889	217.829	93.9969	217.108	93.9739	223.55	93.3755	235.299	91.9412		216.622	90.9506		213.403	94.2373		217.577	93.9997		223.297	92.6779
216.999	90.9414	217.797	90.8913	213.776	94.2516	213.631	94.1824	217.952	93.9897	217.238	93.9666	223.673	93.3671	235.423	91.9304		216.747	90.9391		213.528	94.2305		217.701	93.9926		223.423	92.668
217.123	90.9298	217.925	90.8802	213.899	94.2448	213.75	94.176	218.079	93.9824	217.363	93.9594	223.799	93.3588	235.548	91.9196		216.873	90.9278		213.654	94.2238		217.829	93.9854		223.55	92.6583
217.248	90.9181	218.051	90.8689	214.022	94.2378	213.88	94.1699	218.202	93.9753	217.49	93.952	223.922	93.3502	235.672	91.9085		216.999	90.9163		213.776	94.217		217.952	93.9782		223.673	92.6488
217.371	90.9066	218.174	90.8578	214.15	94.2308	214	94.1637	218.325	93.9678	217.615	93.9448	224.049	93.3416	235.798	91.8976		217.123	90.905		213.899	94.2104		218.079	93.9709		223.799	92.6392
217.5	90.8946	218.3	90.8468	214.274	94.2239	214.128	94.1575	218.452	93.9606	217.74	93.9377	224.171	93.3331	235.921	91.8868		217.248	90.8935		214.022	94.2038		218.202	93.9637		223.922	92.6293
217.621	90.8826	218.425	90.8356	214.4	94.2173	214.253	94.1513	218.577	93.953	217.863	93.9307	224.296	93.3248	236.045	91.8758		217.371	90.8822		214.15	94.1973		218.325	93.9563		224.049	92.6196
217.747	90.8708	218.547	90.8246	214.527	94.2108	214.375	94.1452	218.703	93.9455	217.987	93.9235	224.418	93.3164	236.168	91.8649		217.5	90.8707		214.274	94.1907		218.452	93.9492		224.171	92.6099
217.87	90.8588	218.672	90.8133	214.653	94.2044	214.499	94.1387	218.825	93.9377	218.114	93.9163	224.543	93.3079	236.294	91.8538		217.621	90.8591		214.4	94.1843		218.577	93.9419		224.296	92.6003
217.997	90.8469	218.795	90.8019	214.774	94.1979	214.625	94.1323	218.95	93.9303	218.239	93.9089	224.668	93.2991	236.417	91.8427		217.747	90.8477		214.527	94.178		218.703	93.9345		224.418	92.5906
218.121	90.8347	218.921	90.7907	214.901	94.1914	214.753	94.1265	219.075	93.9228	218.362	93.9016	224.794	93.2903	236.542	91.8314		217.87	90.8361		214.653	94.1715		218.825	93.927		224.543	92.5808
218.246	90.8225	219.046	90.7794	215.026	94.1854	214.88	94.1206	219.198	93.9153	218.488	93.8943	224.919	93.2812	236.665	91.8202		217.997	90.8244		214.774	94.1651		218.95	93.9196		224.668	92.5709
218.369	90.8102	219.173	90.7681	215.152	94.1791	215.002	94.1144	219.325	93.9077	218.614	93.887	225.046	93.2723	236.79	91.8089		218.121	90.8127		214.901	94.1589		219.075	93.9122		224.794	92.5608
218.493	90.798	219.294	90.7568	215.273	94.1727	215.126	94.1081	219.448	93.9	218.738	93.8797	225.171	93.2638	236.916	91.7981		218.246	90.801		215.026	94.153		219.198	93.9048		224.919	92.5507
218.618	90.7856	219.42	90.7452	215.397	94.1664	215.25	94.1018	219.574	93.8923	218.863	93.8723	225.296	93.2549	237.04	91.7868		218.369	90.7892		215.152	94.1467		219.325	93.8973		225.046	92.5406
218.745	90.7734	219.545	90.7335	215.524	94.1599	215.374	94.0956	219.7	93.8844	218.988	93.8645	225.416	93.246	237.16	91.7756		218.493	90.7774		215.273	94.1404		219.448	93.8898		225.171	92.5309
218.872	90.7609	219.672	90.7217	215.649	94.1538	215.498	94.0892	219.823	93.8764	219.111	93.8568	225.542	93.237	237.287	91.7645		218.618	90.7654		215.397	94.1341		219.574	93.8823		225.296	92.5208
218.994	90.7484	219.799	90.7099	215.773	94.1473	215.624	94.0826	219.95	93.8687	219.237	93.8491	225.668	93.2278	237.409	91.7531		218.745	90.7535		215.524	94.1277		219.7	93.8744		225.416	92.5108
219.118	90.7361	219.925	90.6982	215.897	94.1405	215.749	94.0765	220.072	93.8611	219.364	93.8413	225.793	93.2185	237.531	91.7418		218.872	90.7413		215.649	94.1215		219.823	93.8666		225.542	92.5007
219.245	90.7237	220.05	90.6865	216.025	94.1341	215.875	94.0704	220.197	93.8534	219.483	93.8335	225.918	93.2094	237.658	91.7304		218.994	90.7291		215.773	94.115		219.95	93.8589		225.668	92.4905
219.37	90.7113	220.173	90.6747	216.149	94.128	215.997	94.0641	220.324	93.8459	219.616	93.8258	226.041	93.2002	237.783	91.7188		219.118	90.7171		215.897	94.1085		220.072	93.8512		225.793	92.4801
219.495	90.6995	220.295	90.6628	216.271	94.1214	216.121	94.0576	220.448	93.838	219.737	93.8179	226.168	93.1914	237.907	91.7071		219.245	90.7051		216.025	94.1022		220.197	93.8435		225.918	92.4699
219.615	90.6873	220.422	90.6507	216.397	94.1151	216.246	94.0513	220.573	93.8302	219.862	93.8103	226.293	93.1821	238.031	91.6955		219.37	90.693		216.149	94.096		220.324	93.8358		226.041	92.4595
219.746	90.675	220.547	90.6387	216.523	94.1084	216.372	94.0448	220.697	93.8221	219.988	93.8024	226.418	93.1729	238.159	91.6839		219.495	90.6811		216.271	94.0895		220.448	93.828		226.168	92.4493
219.868	90.6626	220.67	90.6268	216.647	94.1019	216.498	94.0386	220.821	93.8144	220.113	93.7946	226.54	93.1639	238.282	91.672		219.615	90.669		216.397	94.0832		220.573	93.8203		226.293	92.4388
219.992	90.6505	220.796	90.615	216.77	94.0949	216.624	94.0323	220.945	93.8071	220.238	93.7867	226.666	93.1547	238.406	91.66		219.746	90.6569		216.523	94.0766		220.697	93.8122		226.418	92.4284
220.119	90.6381	220.924	90.6031	216.895	94.0878	216.749	94.0259	221.071	93.7997	220.365	93.7788	226.788	93.1456	238.532	91.648		219.868	90.6447		216.647	94.0703		220.821	93.8045		226.54	92.418
220.244	90.6259	221.051	90.5911	217.02	94.0811	216.875	94.0194	221.198	93.7923	220.493	93.7711	226.913	93.1364	238.652	91.6359		219.992	90.6327		216.77	94.0636		220.945	93.7969		226.666	92.4074
220.367	90.6134	221.171	90.579	217.142	94.0744	216.999	94.0128	221.321	93.7848	220.616	93.7631	227.037	93.1274	238.778	91.6239		220.119	90.6206		216.895	94.0569		221.071	93.7892		226.788	92.3968
220.493	90.6008	221.297	90.5666	217.27	94.067	217.127	94.0063	221.447	93.7771	220.738	93.7553	227.164	93.1185	238.906	91.6121		220.244	90.6085		217.02	94.0503		221.198	93.7817		226.913	92.3862
220.617	90.5883	221.423	90.5543	217.396	94.0593	217.246	93.9992	221.57	93.7691	220.865	93.7473	227.289	93.1096	239.028	91.6004		220.367	90.5962		217.142	94.0436		221.321	93.7739		227.037	92.3757
220.741	90.5754	221.55	90.5419	217.519	94.0519	217.372	93.9925	221.697	93.7614	220.993	93.7394	227.414	93.1003	239.154	91.5886		220.493	90.5837		217.27	94.0366		221.447	93.7662		227.164	92.3653
220.866	90.5626	221.674	90.5295	217.646	94.0445	217.495	93.9856	221.821	93.7537	221.113	93.7313	227.537	93.0909	239.278	91.5772		220.617	90.5713		217.396	94.0292		221.57	93.7582		227.289	92.355
220.994	90.5496	221.796	90.5173	217.772	94.0373	217.619	93.9789	221.947	93.746	221.238	93.7234	227.665	93.0814	239.401	91.5654		220.741	90.5586		217.519	94.0222		221.697	93.7504		227.414	92.3445
221.115	90.5369	221.924	90.505	217.896	94.0297	217.747	93.972	222.074	93.7378	221.364	93.7154	227.79	93.0719	239.526	91.5541		220.866	90.546		217.646	94.0151		221.821	93.7425		227.537	92.334
221.243	90.5236	222.051	90.4928	218.019	94.0228	217.874	93.9652	222.197	93.7296	221.49	93.7075	227.915	93.0622	239.65	91.5427		220.994	90.5335		217.772	94.0081		221.947	93.7347		227.665	92.3234
221.367	90.5108	222.173	90.4806	218.145	94.0157	217.997	93.9583	222.322	93.7215	221.617	93.6995	228.039	93.0525	239.776	91.5313		221.115	90.5209		217.896	94.0009		222.074	93.7266		227.79	92.313
221.493	90.4979	222.301	90.4685	218.269	94.0081	218.123	93.9516	222.443	93.7135	221.739	93.6915	228.163	93.0433	239.897	91.52		221.243	90.5082		218.019	93.994		222.197	93.7185		227.915	92.3025
221.616	90.4849	222.423	90.4561	218.394	94.0007	218.245	93.9448	222.568	93.7054	221.862	93.6834	228.285	93.0339	240.024	91.5083		221.367	90.4957		218.145	93.987		222.322	93.7105		228.039	92.2919
221.743	90.4714	222.545	90.4439	218.518	93.9935	218.37	93.9379	222.697	93.6973	221.988	93.6754	228.409	93.0243	240.146	91.4966		221.493	90.4832		218.269	93.9798		222.443	93.7025		228.163	92.2816
221.868	90.4581	222.672	90.4318	218.641	93.9862	218.496	93.9312	222.824	93.6893	222.114	93.6673	228.537	93.0148	240.269	91.4854		221.616	90.4705		218.394	93.9727		222.568	93.6944		228.285	92.2711
221.991	90.4451	222.796	90.4194	218.766	93.9788	218.623	93.9244	222.947	93.6812	222.239	93.6592	228.66	93.0054	240.395	91.4739		221.743	90.4576		218.518	93.9657		222.697	93.6864		228.409	92.2605
222.114	90.4321	222.92	90.4071	218.892	93.9719	218.742	93.918	223.071	93.6728	222.364	93.6512	228.786	92.9962	240.519	91.462		221.868	90.445		218.641	93.9587		222.824	93.6783		228.537	92.2501
222.239	90.4191	223.044	90.3946	219.014	93.9651	218.87	93.9112	223.191	93.6646	222.489	93.643	228.911	92.9865	240.643	91.4501		221.991	90.4322		218.766	93.9516		222.947	93.6702		228.66	92.2397
222.367	90.4058	223.173	90.3819	219.137	93.9578	218.997	93.9045	223.319	93.6567	222.612	93.6351	229.031	92.977	240.769	91.4382		222.114	90.4196		218.892	93.9449		223.071	93.662		228.786	92.2291
222.487	90.3928	223.294	90.3692	219.262	93.9504	219.12	93.8978	223.444	93.6483	222.738	93.6273	229.161	92.9673	240.895	91.4262		222.239	90.4068		219.014	93.9381		223.191	93.6538		228.911	92.2183
222.613	90.3797	223.42	90.3566	219.389	93.943	219.245	93.891	223.571	93.64	222.864	93.6193	229.284	92.958	241.015	91.4138		222.367	90.3939		219.137	93.9311		223.319	93.6459		229.031	92.2076
222.738	90.3663	223.543	90.3439	219.515	93.9355	219.369	93.8846	223.691	93.6314	222.987	93.6111	229.407	92.9486	241.142	91.4017		222.487	90.381		219.262	93.9241		223.444	93.6378		229.161	92.1967
222.863	90.3531	223.671	90.3314	219.637	93.928	219.494	93.8776	223.82	93.6231	223.113	93.6029	229.535	92.939	241.265	91.3899		222.613	90.3682		219.389	93.917		223.571	93.6296		229.284	92.1859
222.991	90.3403	223.795	90.3187	219.764	93.9203	219.618	93.8703	223.943	93.6146	223.24	93.5945	229.659	92.9295	241.388	91.3778		222.738	90.3551		219.515	93.9101		223.691	93.6212		229.407	92.1751
223.112	90.3272	223.921	90.306	219.889	93.9128	219.743	93.8633	224.071	93.6061	223.366	93.5863	229.786	92.9198	241.512	91.3655		222.863	90.3422		219.637	93.9028		223.82	93.613		229.535	92.1644
223.238	90.3135	224.048	90.2934	220.014	93.9049	219.867	93.8563	224.192	93.5979	223.487	93.5782	229.908	92.9099	241.633	91.3532		222.991	90.3295		219.764	93.8953		223.943	93.6046		229.659	92.1537
223.362	90.2998	224.171	90.2807	220.139	93.8966	219.994	93.849	224.32	93.5899	223.611	93.5699	230.03	92.9001	241.759	91.341		223.112	90.3166		219.889	93.8881		224.071	93.5962		229.786	92.1426
223.487	90.2862	224.298	90.268	220.265	93.8884	220.119	93.8423	224.441	93.5816	223.739	93.5616	230.157	92.8909	241.884	91.3289		223.238	90.3034		220.014	93.8806		224.192	93.5881		229.908	92.1316
223.612	90.2725	224.423	90.2551	220.389	93.8807	220.242	93.8354	224.571	93.5729	223.861	93.5533	230.279	92.8811	242.008	91.3164		223.362	90.2902		220.139	93.8728		224.32	93.5799		230.03	92.1206
223.737	90.2586	224.547	90.2423	220.515	93.8728	220.368	93.8284	224.694	93.5646	223.99	93.5448	230.404	92.8715	242.135	91.3039		223.487	90.2771		220.265	93.8653		224.441	93.5716		230.157	92.1099
223.859	90.2444	224.674	90.2291	220.643	93.8653	220.495	93.8213	224.815	93.556	224.114	93.5362	230.532	92.8619	242.259	91.2915		223.612	90.2638		220.389	93.858		224.571	93.5631		230.279	92.0987
223.986	90.2307	224.799	90.216	220.763	93.8578	220.617	93.8137	224.94	93.5476	224.24	93.5278	230.651	92.8521	242.383	91.2794		223.737	90.2504		220.515	93.8506		224.694	93.5547		230.404	92.0877
224.11	90.2169	224.925	90.2027	220.887	93.8505	220.745	93.8068	225.064	93.5393	224.362	93.5194	230.782	92.8425	242.509	91.2672		223.859	90.2368		220.643	93.8433		224.815	93.5461		230.532	92.0767
224.233	90.2029	225.048	90.1895	221.01	93.8435	220.871	93.8001	225.189	93.5311	224.488	93.5113	230.908	92.8323	242.635	91.255		223.986	90.2233		220.763	93.8357		224.94	93.5377		230.651	92.0658
224.36	90.1889	225.173	90.1764	221.135	93.8366	220.994	93.7933	225.317	93.5226	224.613	93.503	231.029	92.8222	242.756	91.2428		224.11	90.2098		220.887	93.8287		225.064	93.5294		230.782	92.0548
224.483	90.1749	225.297	90.1633	221.26	93.8302	221.121	93.7864	225.44	93.5137	224.737	93.4943	231.154	92.8122	242.879	91.2306		224.233	90.1962		221.01	93.8218		225.189	93.5212		230.908	92.0437
224.609	90.1608	225.423	90.1502	221.386	93.8236	221.244	93.7796	225.564	93.5049	224.863	93.4857	231.279	92.8023	243.004	91.2181		224.36	90.1827		221.135	93.815		225.317	93.5128		231.029	92.0325
224.731	90.147	225.547	90.1369	221.509	93.817	221.37	93.7726	225.691	93.4964	224.984	93.4771	231.403	92.792	243.128	91.2054		224.483	90.1691		221.26	93.8083		225.44	93.504		231.154	92.0214
224.861	90.1331	225.674	90.1236	221.637	93.8099	221.496	93.7655	225.816	93.4881	225.112	93.4683	231.526	92.7821	243.254	91.1934		224.609	90.1555		221.386	93.8016		225.564	93.4953		231.279	92.0102
224.982	90.1193	225.796	90.1102	221.76	93.8025	221.617	93.7581	225.941	93.4796	225.238	93.4597	231.649	92.7718	243.375	91.1813		224.731	90.142		221.509	93.7948		225.691	93.4867		231.403	91.9987
225.109	90.1062	225.92	90.0969	221.885	93.7944	221.744	93.7507	226.067	93.4712	225.359	93.4513	231.778	92.7613	243.502	91.1691		224.861	90.1283		221.637	93.7877		225.816	93.4782		231.526	91.9878
225.233	90.0921	226.05	90.0836	222.013	93.7864	221.864	93.7432	226.191	93.4627	225.487	93.4426	231.905	92.751	243.626	91.1567		224.982	90.1147		221.76	93.7803		225.941	93.4697		231.649	91.9765
225.362	90.078	226.174	90.0704	222.133	93.7784	221.991	93.7351	226.313	93.4535	225.606	93.434	232.026	92.7407	243.751	91.1443		225.109	90.1016		221.885	93.7726		226.067	93.4613		231.778	91.9652
225.482	90.0637	226.298	90.0568	222.258	93.7702	222.115	93.7271	226.441	93.4443	225.735	93.4253	232.151	92.7308	243.876	91.1319		225.233	90.0878		222.013	93.7648		226.191	93.4526		231.905	91.9538
225.608	90.0495	226.422	90.0431	222.382	93.7615	222.24	93.7188	226.57	93.4354	225.861	93.4165	232.274	92.721	244	91.1195		225.362	90.0742		222.133	93.7568		226.313	93.4438		232.026	91.9425
225.728	90.0353	226.546	90.0295	222.509	93.7528	222.365	93.7107	226.694	93.4268	225.988	93.4079	232.4	92.7108	244.124	91.1066		225.482	90.0602		222.258	93.7487		226.441	93.4348		232.151	91.9313
225.856	90.0209	226.674	90.0158	222.634	93.7443	222.493	93.7023	226.817	93.4177	226.112	93.3994	232.523	92.7006	244.248	91.0945		225.608	90.0463		222.382	93.7402		226.57	93.4259		232.274	91.9202
225.979	90.0061	226.799	90.0022	222.757	93.7352	222.617	93.694	226.939	93.4088	226.237	93.3907	232.65	92.6904	244.372	91.0825		225.728	90.0324		222.509	93.7318		226.694	93.4173		232.4	91.9087
226.104	89.9916	226.924	89.9888	222.879	93.7264	222.74	93.6858	227.065	93.4	226.363	93.3821	232.772	92.6799	244.497	91.0699		225.856	90.0184		222.634	93.7233		226.817	93.4085		232.523	91.8976
226.229	89.9771	227.052	89.9752	223.004	93.7177	222.864	93.6777	227.192	93.3912	226.488	93.3732	232.898	92.6699	244.62	91.0573		225.979	90.0041		222.757	93.7146		226.939	93.3998		232.65	91.8865
226.354	89.9623	227.179	89.9617	223.129	93.7092	222.991	93.6698	227.315	93.3823	226.614	93.3643	233.026	92.6597	244.743	91.0449		226.104	89.9902		222.879	93.7061		227.065	93.3911		232.772	91.8749
226.478	89.9479	227.3	89.948	223.253	93.7009	223.118	93.6623	227.44	93.3734	226.734	93.3554	233.146	92.6492	244.869	91.0324		226.229	89.9761		223.004	93.6977		227.192	93.3822		232.898	91.8636
226.602	89.9335	227.425	89.9342	223.381	93.6926	223.241	93.6549	227.566	93.3646	226.862	93.3465	233.271	92.639	244.994	91.0198		226.354	89.962		223.129	93.6895		227.315	93.3733		233.026	91.8523
226.73	89.9192	227.549	89.9206	223.505	93.6842	223.364	93.6475	227.688	93.356	226.988	93.3376	233.398	92.6285	245.118	91.0071		226.478	89.9479		223.253	93.6816		227.44	93.3644		233.146	91.8408
226.853	89.9049	227.673	89.9068	223.628	93.676	223.489	93.6402	227.814	93.3473	227.11	93.3288	233.521	92.6182	245.242	90.9943		226.602	89.9339		223.381	93.6737		227.566	93.3555		233.271	91.8294
226.979	89.8903	227.795	89.893	223.752	93.6678	223.618	93.6329	227.938	93.3383	227.238	93.32	233.646	92.608	245.368	90.9819		226.73	89.9199		223.505	93.6658		227.688	93.3468		233.398	91.8178
227.104	89.8759	227.923	89.8791	223.879	93.6599	223.744	93.6256	228.062	93.3295	227.36	93.3111	233.769	92.598	245.49	90.9691		226.853	89.9059		223.628	93.6581		227.814	93.3381		233.521	91.8063
227.227	89.8616	228.049	89.8651	224.003	93.6519	223.865	93.6177	228.186	93.3207	227.488	93.3021	233.896	92.5879	245.616	90.9562		226.979	89.8917		223.752	93.6503		227.938	93.3292		233.646	91.795
227.352	89.8473	228.173	89.8511	224.13	93.6444	223.992	93.6098	228.311	93.3114	227.607	93.2931	234.02	92.5777	245.743	90.9437		227.104	89.8775		223.879	93.6427		228.062	93.3203		233.769	91.7835
227.477	89.8323	228.298	89.8369	224.25	93.6368	224.116	93.6019	228.439	93.3021	227.732	93.2839	234.148	92.5672	245.864	90.9309		227.227	89.8634		224.003	93.6348		228.186	93.3114		233.896	91.772
227.604	89.8171	228.421	89.8227	224.378	93.6293	224.24	93.5937	228.562	93.2927	227.859	93.2748	234.27	92.5566	245.988	90.9181		227.352	89.8492		224.13	93.6271		228.311	93.3023		234.02	91.7607
227.724	89.802	228.547	89.8085	224.501	93.6218	224.366	93.5852	228.687	93.2836	227.985	93.2659	234.394	92.5463	246.111	90.9055		227.477	89.8346		224.25	93.6193		228.439	93.293		234.148	91.749
227.849	89.7866	228.672	89.7941	224.628	93.6139	224.489	93.5763	228.815	93.2748	228.109	93.2567	234.516	92.5358	246.235	90.8925		227.604	89.8199		224.378	93.6115		228.562	93.2837		234.27	91.7374
227.975	89.7717	228.798	89.7797	224.752	93.6058	224.614	93.5682	228.938	93.2657	228.236	93.2476	234.644	92.5252	246.364	90.8796		227.724	89.8053		224.501	93.6035		228.687	93.2747		234.394	91.7259
228.099	89.7565	228.923	89.7653	224.873	93.5976	224.738	93.5598	229.06	93.2565	228.357	93.2384	234.769	92.5147	246.486	90.8669		227.849	89.7903		224.628	93.5951		228.815	93.2658		234.516	91.7142
228.22	89.7417	229.048	89.7511	224.999	93.5889	224.865	93.5514	229.187	93.2473	228.482	93.2293	234.893	92.5044	246.611	90.8538		227.975	89.7757		224.752	93.587		228.938	93.2566		234.644	91.7024
228.348	89.7266	229.175	89.7369	225.12	93.5797	224.988	93.543	229.312	93.2384	228.61	93.2201	235.014	92.4938	246.738	90.8408		228.099	89.7609		224.873	93.5787		229.06	93.2475		234.769	91.6908
228.471	89.7115	229.299	89.7224	225.251	93.5706	225.113	93.5346	229.436	93.2293	228.734	93.2108	235.137	92.4834	246.861	90.8275		228.22	89.7464		224.999	93.5702		229.187	93.2383		234.893	91.6791
228.598	89.6964	229.421	89.7078	225.37	93.5611	225.235	93.5264	229.559	93.2204	228.859	93.2015	235.266	92.4728	246.982	90.8139		228.348	89.7317		225.12	93.5614		229.312	93.2292		235.014	91.6673
228.722	89.6814	229.545	89.6934	225.498	93.5514	225.362	93.5183	229.687	93.2116	228.984	93.1925	235.392	92.4622	247.109	90.8005		228.471	89.7169		225.251	93.5526		229.436	93.2201		235.137	91.6555
228.847	89.6663	229.668	89.6789	225.622	93.5415	225.488	93.5102	229.81	93.2025	229.109	93.1834	235.514	92.4518	247.236	90.787		228.598	89.7021		225.37	93.5437		229.559	93.211		235.266	91.6434
228.971	89.6514	229.795	89.6644	225.748	93.531	225.611	93.5026	229.936	93.1931	229.235	93.1742	235.637	92.4411	247.361	90.7734		228.722	89.6874		225.498	93.5349		229.687	93.2021		235.392	91.6314
229.099	89.6363	229.922	89.6499	225.876	93.5208	225.737	93.495	230.06	93.1835	229.358	93.1648	235.765	92.4301	247.482	90.7602		228.847	89.6726		225.622	93.5259		229.81	93.193		235.514	91.6194
229.216	89.621	230.045	89.6355	226.001	93.5109	225.861	93.4869	230.184	93.1739	229.483	93.1555	235.887	92.4195	247.61	90.747		228.971	89.6579		225.748	93.5168		229.936	93.1837		235.637	91.6073
229.343	89.6055	230.173	89.6209	226.121	93.501	225.988	93.4791	230.308	93.1645	229.607	93.146	236.011	92.4082	247.729	90.7339		229.099	89.6431		225.876	93.5079		230.06	93.1742		235.765	91.5952
229.467	89.5899	230.298	89.6059	226.25	93.4911	226.111	93.4709	230.436	93.1552	229.732	93.1364	236.133	92.3969	247.854	90.7211		229.216	89.6282		226.001	93.4989		230.184	93.1647		235.887	91.5832
229.595	89.5741	230.424	89.5912	226.373	93.4815	226.238	93.4627	230.558	93.1457	229.858	93.1269	236.262	92.3854	247.978	90.7082		229.343	89.6132		226.121	93.49		230.308	93.1552		236.011	91.5711
229.717	89.5584	230.546	89.5764	226.5	93.4719	226.361	93.4547	230.685	93.136	229.982	93.1177	236.386	92.3742	248.099	90.6952		229.467	89.5979		226.25	93.481		230.436	93.1458		236.133	91.559
229.844	89.5425	230.673	89.5617	226.624	93.4622	226.486	93.4465	230.809	93.1262	230.109	93.1081	236.509	92.363	248.227	90.6825		229.595	89.5826		226.373	93.4721		230.558	93.1363		236.262	91.5468
229.966	89.5264	230.798	89.5467	226.749	93.4538	226.61	93.4378	230.933	93.1163	230.232	93.0984	236.634	92.352	248.35	90.6695		229.717	89.5674		226.5	93.4633		230.685	93.1268		236.386	91.5347
230.093	89.5103	230.921	89.5318	226.869	93.4453	226.734	93.4291	231.055	93.1067	230.353	93.0888	236.76	92.3411	248.475	90.6568		229.844	89.5521		226.624	93.4544		230.809	93.1171		236.509	91.5227
230.216	89.4938	231.045	89.5168	226.994	93.4369	226.859	93.4202	231.18	93.0972	230.479	93.0792	236.883	92.3301	248.598	90.6442		229.966	89.5365		226.749	93.4458		230.933	93.1074		236.634	91.5107
230.342	89.4778	231.17	89.5018	227.118	93.4282	226.983	93.412	231.307	93.0877	230.602	93.0698	237.007	92.3192	248.724	90.6313		230.093	89.521		226.869	93.4372		231.055	93.0978		236.76	91.4989
230.464	89.4616	231.293	89.4868	227.245	93.4194	227.11	93.4033	231.432	93.0781	230.731	93.0603	237.134	92.3083	248.846	90.6188		230.216	89.5053		226.994	93.4286		231.18	93.0882		236.883	91.4871
230.595	89.4454	231.417	89.4717	227.365	93.4104	227.239	93.3946	231.552	93.0684	230.855	93.0507	237.258	92.2978	248.973	90.606		230.342	89.4898		227.118	93.4201		231.307	93.0787		237.007	91.4753
230.716	89.4295	231.542	89.4567	227.492	93.4011	227.363	93.3859	231.678	93.0587	230.982	93.0409	237.381	92.2871	249.097	90.5929		230.464	89.4742		227.245	93.4113		231.432	93.0692		237.134	91.4636
230.844	89.4135	231.668	89.4415	227.617	93.3919	227.483	93.3773	231.801	93.0489	231.106	93.0312	237.506	92.2763	249.219	90.5796		230.595	89.4586		227.365	93.4025		231.552	93.0596		237.258	91.4519
230.965	89.3976	231.792	89.4264	227.743	93.383	227.608	93.3687	231.928	93.0392	231.231	93.0214	237.632	92.265	249.346	90.5663		230.716	89.4431		227.492	93.3935		231.678	93.0498		237.381	91.44
231.092	89.3815	231.919	89.4111	227.866	93.3742	227.733	93.3603	232.054	93.0294	231.356	93.0117	237.756	92.254	249.468	90.5533		230.844	89.4275		227.617	93.3846		231.801	93.0401		237.506	91.4279
231.214	89.3655	232.039	89.3959	227.992	93.3645	227.858	93.3522	232.178	93.0196	231.478	93.0019	237.881	92.2426	249.59	90.5406		230.965	89.412		227.743	93.3758		231.928	93.0303		237.632	91.4157
231.339	89.3493	232.164	89.3805	228.117	93.3551	227.982	93.3444	232.303	93.0098	231.606	92.992	238.005	92.2313	249.719	90.5276		231.092	89.3963		227.866	93.3672		232.054	93.0206		237.756	91.4037
231.465	89.3328	232.289	89.3649	228.24	93.346	228.106	93.3363	232.428	93.0001	231.73	92.9823	238.129	92.2201	249.84	90.5141		231.214	89.3807		227.992	93.3583		232.178	93.0108		237.881	91.3916
231.59	89.3166	232.418	89.3495	228.363	93.3371	228.231	93.3279	232.547	92.9901	231.857	92.9723	238.255	92.2089	249.966	90.5009		231.339	89.3649		228.117	93.3497		232.303	93.0009		238.005	91.3794
231.714	89.3001	232.542	89.3339	228.486	93.328	228.359	93.3194	232.677	92.9804	231.98	92.9623	238.378	92.1973	250.092	90.487		231.465	89.3489		228.24	93.3412		232.428	92.9912		238.129	91.3671
231.836	89.2839	232.665	89.3181	228.613	93.3191	228.479	93.3106	232.798	92.9709	232.103	92.9523	238.505	92.1858	250.215	90.4733		231.59	89.3331		228.363	93.3325		232.547	92.9812		238.255	91.3549
231.964	89.2672	232.792	89.3023	228.739	93.3105	228.607	93.302	232.923	92.961	232.225	92.9423	238.628	92.1743	250.341	90.4595		231.714	89.317		228.486	93.3237		232.677	92.9713		238.378	91.3422
232.09	89.2509	232.914	89.2865	228.862	93.3018	228.729	93.2932	233.048	92.9513	232.349	92.9324	238.754	92.1627	250.463	90.4462		231.836	89.301		228.613	93.3149		232.798	92.9616		238.505	91.3295
232.212	89.2341	233.039	89.2704	228.986	93.2924	228.859	93.2841	233.175	92.9415	232.476	92.9225	238.88	92.1517	250.587	90.4326		231.964	89.2848		228.739	93.3062		232.923	92.9517		238.628	91.3169
232.336	89.2174	233.165	89.2546	229.114	93.2835	228.983	93.2752	233.299	92.9316	232.601	92.9125	239.005	92.1403	250.712	90.419		232.09	89.2687		228.862	93.2975		233.048	92.9419		238.754	91.3045
232.462	89.2009	233.288	89.2385	229.238	93.2742	229.106	93.2661	233.422	92.9217	232.724	92.9026	239.127	92.1289	250.835	90.4051		232.212	89.2522		228.986	93.2883		233.175	92.932		238.88	91.2921
232.587	89.1842	233.413	89.2225	229.363	93.2646	229.228	93.2567	233.545	92.9118	232.848	92.8927	239.251	92.1173	250.96	90.3911		232.336	89.236		229.114	93.2793		233.299	92.922		239.005	91.2796
232.71	89.1679	233.536	89.2065	229.485	93.2551	229.354	93.2475	233.673	92.9018	232.974	92.8825	239.377	92.1057	251.082	90.377		232.462	89.2197		229.238	93.2702		233.422	92.9121		239.127	91.267
232.835	89.1511	233.662	89.1904	229.61	93.2451	229.477	93.2381	233.795	92.8922	233.099	92.8725	239.503	92.0944	251.21	90.3629		232.587	89.2034		229.363	93.2607		233.545	92.9022		239.251	91.2542
232.958	89.1341	233.787	89.1743	229.733	93.2356	229.599	93.2287	233.921	92.8823	233.223	92.8626	239.628	92.0831	251.334	90.3494		232.71	89.1872		229.485	93.2513		233.673	92.8921		239.377	91.2414
233.086	89.1167	233.914	89.1583	229.859	93.2259	229.725	93.2195	234.047	92.8723	233.348	92.8527	239.751	92.0717	251.458	90.3359		232.835	89.1707		229.61	93.2416		233.795	92.8823		239.503	91.2287
233.21	89.0997	234.041	89.1423	229.981	93.216	229.848	93.2104	234.17	92.8621	233.47	92.8427	239.873	92.06	251.581	90.3225		232.958	89.1542		229.733	93.2321		233.921	92.8725		239.628	91.2162
233.334	89.0826	234.164	89.1261	230.107	93.2064	229.975	93.2013	234.292	92.8517	233.599	92.8326	240.001	92.049	251.707	90.3086		233.086	89.1375		229.859	93.2227		234.047	92.8625		239.751	91.2038
233.46	89.0653	234.288	89.1102	230.234	93.1973	230.101	93.1919	234.417	92.8413	233.72	92.8225	240.122	92.0377	251.829	90.2951		233.21	89.121		229.981	93.2132		234.17	92.8524		239.873	91.1912
233.582	89.0481	234.414	89.094	230.358	93.1872	230.222	93.1824	234.548	92.8312	233.843	92.8124	240.246	92.0263	251.954	90.2811		233.334	89.1043		230.107	93.2039		234.292	92.8422		240.001	91.1788
233.708	89.0306	234.538	89.0778	230.484	93.1773	230.346	93.173	234.667	92.821	233.969	92.8024	240.372	92.0149	252.081	90.2677		233.46	89.0877		230.234	93.1946		234.417	92.8319		240.122	91.1664
233.831	89.0136	234.661	89.0617	230.612	93.1679	230.474	93.1633	234.793	92.8109	234.094	92.7923	240.495	92.0035	252.204	90.2543		233.582	89.071		230.358	93.1848		234.548	92.8218		240.246	91.1537
233.956	88.9964	234.787	89.0456	230.735	93.1581	230.598	93.1544	234.918	92.8006	234.219	92.7823	240.621	91.9918	252.326	90.2408		233.708	89.0542		230.484	93.1752		234.667	92.8117		240.372	91.1413
234.081	88.9791	234.913	89.0294	230.861	93.1484	230.722	93.1457	235.042	92.79	234.344	92.772	240.746	91.9803	252.452	90.227		233.831	89.0377		230.612	93.1656		234.793	92.8016		240.495	91.1289
234.206	88.9621	235.039	89.0131	230.985	93.1385	230.847	93.1366	235.164	92.7795	234.472	92.7616	240.87	91.9686	252.576	90.2132		233.956	89.021		230.735	93.1563		234.918	92.7914		240.621	91.1163
234.329	88.9451	235.164	88.9967	231.112	93.1288	230.974	93.1273	235.291	92.7693	234.595	92.7513	240.996	91.9566	252.701	90.199		234.081	89.0042		230.861	93.1471		235.042	92.781		240.746	91.1036
234.455	88.9278	235.286	88.9802	231.235	93.1192	231.099	93.118	235.414	92.759	234.72	92.7411	241.121	91.9447	252.828	90.1853		234.206	88.9876		230.985	93.1375		235.164	92.7706		240.87	91.0909
234.579	88.9102	235.412	88.9637	231.356	93.1091	231.223	93.1086	235.538	92.7491	234.85	92.7308	241.244	91.9325	252.952	90.1717		234.329	88.9709		231.112	93.128		235.291	92.7603		240.996	91.0778
234.706	88.8928	235.537	88.947	231.481	93.0989	231.339	93.0995	235.665	92.7392	234.97	92.7204	241.367	91.9203	253.074	90.1581		234.455	88.954		231.235	93.1186		235.414	92.75		241.121	91.065
234.83	88.8752	235.663	88.9303	231.608	93.0898	231.469	93.0902	235.785	92.7292	235.095	92.7098	241.494	91.9086	253.2	90.1441		234.579	88.9369		231.356	93.1088		235.538	92.7399		241.244	91.0521
234.952	88.8577	235.786	88.9138	231.731	93.0804	231.593	93.0805	235.911	92.7187	235.221	92.6992	241.619	91.8968	253.323	90.1303		234.706	88.9199		231.481	93.0992		235.665	92.7298		241.367	91.0392
235.081	88.8398	235.908	88.897	231.855	93.0706	231.719	93.0711	236.038	92.7084	235.344	92.6886	241.742	91.8852	253.446	90.1163		234.83	88.9028		231.608	93.09		235.785	92.7195		241.494	91.0263
235.204	88.8221	236.035	88.8801	231.981	93.0607	231.843	93.061	236.161	92.6982	235.467	92.6781	241.866	91.8737	253.568	90.1028		234.952	88.8858		231.731	93.0805		235.911	92.709		241.619	91.0135
235.327	88.8045	236.161	88.8633	232.105	93.0509	231.97	93.0505	236.285	92.6879	235.591	92.6678	241.989	91.8618	253.696	90.0893		235.081	88.8684		231.855	93.0708		236.038	92.6985		241.742	91.0008
235.454	88.7867	236.283	88.8464	232.229	93.0409	232.095	93.0403	236.408	92.6776	235.719	92.6575	242.111	91.8499	253.823	90.0753		235.204	88.8511		231.981	93.0608		236.161	92.6882		241.866	90.9883
235.577	88.7687	236.41	88.8296	232.353	93.0307	232.22	93.0303	236.533	92.6668	235.84	92.6469	242.24	91.8383	253.944	90.0617		235.327	88.8339		232.105	93.0507		236.285	92.6778		241.989	90.9755
235.701	88.7507	236.533	88.8125	232.48	93.0207	232.342	93.0204	236.66	92.6563	235.966	92.6363	242.365	91.8267	254.072	90.0478		235.454	88.8165		232.229	93.0406		236.408	92.6675		242.111	90.9626
235.823	88.7322	236.659	88.7956	232.602	93.0109	232.47	93.0106	236.783	92.6454	236.092	92.6257	242.488	91.8148	254.195	90.0339		235.577	88.7991		232.353	93.0305		236.533	92.6568		242.24	90.95
235.948	88.7135	236.784	88.7786	232.731	93.0011	232.594	93.0005	236.907	92.6348	236.218	92.6151	242.612	91.8032	254.318	90.0198		235.701	88.7816		232.48	93.0206		236.66	92.6463		242.365	90.9372
236.074	88.6951	236.91	88.7614	232.85	92.9903	232.72	92.9903	237.031	92.6241	236.34	92.6047	242.735	91.7911	254.445	90.0059		235.823	88.7639		232.602	93.0108		236.783	92.6355		242.488	90.9243
236.199	88.6767	237.035	88.744	232.978	92.9795	232.844	92.9803	237.158	92.6135	236.467	92.594	242.861	91.7789	254.569	89.9916		235.948	88.7461		232.731	93.0008		236.907	92.625		242.612	90.9115
236.321	88.6582	237.158	88.7267	233.099	92.9692	232.965	92.9705	237.282	92.603	236.591	92.5833	242.983	91.7668	254.691	89.9775		236.074	88.7283		232.85	92.9903		237.031	92.6144		242.735	90.8985
236.446	88.6395	237.281	88.7091	233.224	92.959	233.09	92.9604	237.407	92.5923	236.715	92.5726	243.109	91.7546	254.814	89.9635		236.199	88.7103		232.978	92.9799		237.158	92.6038		242.861	90.8852
236.567	88.6205	237.409	88.6916	233.347	92.9488	233.215	92.9507	237.53	92.5819	236.841	92.5617	243.233	91.7424	254.938	89.9494		236.321	88.6925		233.099	92.9699		237.282	92.5931		242.983	90.8721
236.694	88.6018	237.536	88.6741	233.474	92.9387	233.341	92.9408	237.652	92.5709	236.967	92.5507	243.359	91.7303	255.061	89.9356		236.446	88.6743		233.224	92.9597		237.407	92.5825		243.109	90.8591
236.82	88.5833	237.659	88.6568	233.598	92.9286	233.465	92.9305	237.782	92.5601	237.092	92.54	243.484	91.7181	255.188	89.9214		236.567	88.6561		233.347	92.9497		237.53	92.5718		243.233	90.8459
236.944	88.5649	237.786	88.6394	233.722	92.9178	233.59	92.9202	237.905	92.5494	237.216	92.5292	243.61	91.7057	255.311	89.9074		236.694	88.638		233.474	92.9397		237.652	92.5608		243.359	90.833
237.071	88.5468	237.908	88.6218	233.848	92.907	233.715	92.9093	238.031	92.5386	237.338	92.5183	243.732	91.6936	255.436	89.8931		236.82	88.62		233.598	92.9296		237.782	92.5501		243.484	90.8198
237.193	88.5287	238.03	88.6043	233.974	92.8961	233.841	92.8988	238.153	92.5279	237.461	92.5075	243.854	91.681	255.559	89.8792		236.944	88.6022		233.722	92.919		237.905	92.5393		243.61	90.8066
237.321	88.5101	238.156	88.5867	234.097	92.8857	233.965	92.8887	238.279	92.5171	237.585	92.4965	243.982	91.6688	255.685	89.8652		237.071	88.5843		233.848	92.9082		238.031	92.5285		243.732	90.7933
237.445	88.4919	238.283	88.5691	234.223	92.8753	234.091	92.8785	238.404	92.5064	237.708	92.4856	244.106	91.6571	255.807	89.8513		237.193	88.5665		233.974	92.8974		238.153	92.5177		243.854	90.7801
237.567	88.4734	238.408	88.5516	234.346	92.8649	234.212	92.8681	238.528	92.4957	237.835	92.4747	244.23	91.6445	255.935	89.8372		237.321	88.5484		234.097	92.8872		238.279	92.5068		243.982	90.767
237.693	88.4548	238.533	88.5341	234.469	92.8541	234.336	92.858	238.651	92.4848	237.962	92.4637	244.352	91.6323	256.056	89.8228		237.445	88.5305		234.223	92.8769		238.404	92.496		244.106	90.7542
237.816	88.4363	238.657	88.5163	234.593	92.8431	234.46	92.8477	238.775	92.4737	238.086	92.4527	244.477	91.6201	256.181	89.8084		237.567	88.5125		234.346	92.8665		238.528	92.4852		244.23	90.7409
237.942	88.4173	238.781	88.4983	234.718	92.8318	234.584	92.8376	238.901	92.4627	238.211	92.4416	244.599	91.6077	256.307	89.7937		237.693	88.4944		234.469	92.8561		238.651	92.4742		244.352	90.7275
238.067	88.3984	238.905	88.4803	234.841	92.8206	234.711	92.8274	239.027	92.4521	238.335	92.4304	244.725	91.5954	256.429	89.7796		237.816	88.4763		234.593	92.8454		238.775	92.4632		244.477	90.7142
238.189	88.3788	239.03	88.4622	234.965	92.8097	234.835	92.8175	239.151	92.441	238.461	92.4193	244.851	91.5833	256.554	89.7654		237.942	88.4578		234.718	92.8347		238.901	92.4521		244.599	90.7007
238.317	88.3595	239.154	88.444	235.093	92.7993	234.958	92.808	239.275	92.4301	238.586	92.4081	244.977	91.5711	256.68	89.751		238.067	88.4393		234.841	92.824		239.027	92.4413		244.725	90.6875
238.44	88.3401	239.284	88.4255	235.218	92.7884	235.08	92.7982	239.396	92.4188	238.71	92.397	245.1	91.5591	256.806	89.7363		238.189	88.4205		234.965	92.8136		239.151	92.4301		244.851	90.6744
238.565	88.321	239.405	88.4071	235.343	92.778	235.206	92.7883	239.521	92.4077	238.835	92.3857	245.225	91.5468	256.926	89.7223		238.317	88.4018		235.093	92.8036		239.275	92.4191		244.977	90.6611
238.689	88.3012	239.529	88.3888	235.466	92.7676	235.333	92.7783	239.648	92.3967	238.961	92.3746	245.349	91.534	257.05	89.7082		238.44	88.3828		235.218	92.7933		239.396	92.4079		245.1	90.6477
238.816	88.2815	239.654	88.37	235.591	92.7566	235.456	92.7681	239.773	92.3854	239.087	92.3635	245.472	91.5216	257.174	89.6941		238.565	88.3641		235.343	92.7832		239.521	92.3967		245.225	90.6345
238.938	88.262	239.78	88.3516	235.715	92.7467	235.581	92.7577	239.899	92.3741	239.21	92.3524	245.595	91.5088	257.298	89.6796		238.689	88.345		235.466	92.7729		239.648	92.3856		245.349	90.6211
239.065	88.2425	239.903	88.3329	235.84	92.7368	235.708	92.7476	240.019	92.363	239.333	92.3414	245.72	91.4962	257.428	89.6653		238.816	88.3257		235.591	92.7623		239.773	92.3744		245.472	90.6078
239.186	88.2229	240.029	88.3146	235.963	92.7272	235.829	92.7372	240.143	92.3523	239.46	92.3303	245.841	91.4839	257.551	89.6513		238.938	88.3068		235.715	92.7522		239.899	92.3632		245.595	90.5942
239.31	88.2035	240.153	88.2961	236.088	92.7176	235.957	92.727	240.268	92.341	239.581	92.3192	245.968	91.4714	257.674	89.6367		239.065	88.2877		235.84	92.7422		240.019	92.3522		245.72	90.5807
239.432	88.1841	240.281	88.2773	236.211	92.7079	236.079	92.7164	240.391	92.33	239.703	92.3081	246.095	91.4589	257.8	89.6223		239.186	88.2688		235.963	92.7322		240.143	92.3413		245.841	90.5676
239.557	88.1647	240.404	88.2588	236.333	92.6975	236.201	92.706	240.515	92.3187	239.83	92.297	246.216	91.4463	257.922	89.6082		239.31	88.2498		236.088	92.7223		240.268	92.3301		245.968	90.5541
239.683	88.1448	240.531	88.2403	236.46	92.6874	236.327	92.6956	240.64	92.3077	239.958	92.2857	246.344	91.4337	258.046	89.594		239.432	88.2307		236.211	92.7121		240.391	92.319		246.095	90.5406
239.804	88.1247	240.654	88.2216	236.583	92.6768	236.452	92.6851	240.767	92.2963	240.081	92.2748	246.467	91.4213	258.17	89.5793		239.557	88.2118		236.333	92.7017		240.515	92.3079		246.216	90.5272
239.93	88.1048	240.777	88.2027	236.71	92.6661	236.578	92.6748	240.89	92.2849	240.206	92.2638	246.593	91.4087	258.295	89.5648		239.683	88.1926		236.46	92.6915		240.64	92.2967		246.344	90.5138
240.059	88.0847	240.899	88.1839	236.831	92.6552	236.697	92.6644	241.011	92.2734	240.329	92.2526	246.717	91.3963	258.418	89.5502		239.804	88.1731		236.583	92.6809		240.767	92.2856		246.467	90.5003
240.181	88.0647	241.024	88.165	236.956	92.6436	236.821	92.6541	241.135	92.2621	240.454	92.2411	246.84	91.384	258.54	89.5356		239.93	88.1537		236.71	92.6704		240.89	92.2743		246.593	90.4868
240.306	88.0444	241.15	88.1462	237.086	92.6323	236.95	92.6435	241.259	92.2508	240.578	92.2298	246.966	91.3714	258.669	89.5213		240.059	88.1343		236.831	92.6598		241.011	92.263		246.717	90.4732
240.43	88.0244	241.276	88.127	237.21	92.621	237.075	92.6332	241.385	92.2392	240.702	92.2184	247.091	91.3586	258.79	89.5067		240.181	88.1149		236.956	92.6489		241.135	92.2516		246.84	90.4598
240.554	88.004	241.401	88.1077	237.332	92.6091	237.202	92.6229	241.512	92.2278	240.826	92.207	247.215	91.3462	258.917	89.492		240.306	88.0953		237.086	92.6379		241.259	92.2403		246.966	90.4463
240.676	87.9832	241.523	88.0885	237.46	92.5977	237.322	92.6127	241.635	92.2166	240.952	92.1956	247.34	91.3331	259.043	89.4771		240.43	88.0757		237.21	92.6271		241.385	92.2288		247.091	90.4327
240.801	87.9623	241.652	88.0689	237.582	92.5868	237.448	92.6023	241.76	92.2052	241.078	92.1841	247.464	91.3202	259.165	89.4621		240.554	88.0558		237.332	92.616		241.512	92.2174		247.215	90.4191
240.926	87.9422	241.775	88.0494	237.71	92.5756	237.571	92.5918	241.887	92.1937	241.204	92.1725	247.59	91.307	259.291	89.4476		240.676	88.0358		237.46	92.6052		241.635	92.2061		247.34	90.4051
241.05	87.9218	241.9	88.03	237.832	92.5639	237.693	92.5809	242.011	92.1822	241.329	92.1607	247.714	91.2935	259.417	89.433		240.801	88.0156		237.582	92.5945		241.76	92.1946		247.464	90.3911
241.172	87.9015	242.024	88.0104	237.958	92.5523	237.82	92.5702	242.131	92.1709	241.452	92.1491	247.839	91.2803	259.54	89.4184		240.926	87.9958		237.71	92.5837		241.887	92.1831		247.59	90.3773
241.295	87.8812	242.149	87.9908	238.081	92.5408	237.947	92.5597	242.259	92.1598	241.578	92.1374	247.962	91.2673	259.664	89.4035		241.05	87.9759		237.832	92.5724		242.011	92.1715		247.714	90.3633
241.422	87.8605	242.276	87.971	238.206	92.5293	238.07	92.549	242.382	92.148	241.7	92.126	248.083	91.2544	259.785	89.3891		241.172	87.956		237.958	92.5613		242.131	92.16		247.839	90.3493
241.546	87.8397	242.398	87.9512	238.331	92.5176	238.192	92.5384	242.506	92.1363	241.824	92.1144	248.21	91.2416	259.909	89.3743		241.295	87.936		238.081	92.5502		242.259	92.1486		247.962	90.3354
241.668	87.8188	242.524	87.9315	238.454	92.5064	238.318	92.528	242.629	92.1246	241.949	92.1029	248.333	91.2287	260.035	89.3601		241.422	87.9158		238.206	92.5391		242.382	92.137		248.083	90.3217
241.798	87.7976	242.646	87.9119	238.578	92.4955	238.44	92.5175	242.753	92.1131	242.073	92.0911	248.462	91.2155	260.159	89.3457		241.546	87.8955		238.331	92.528		242.506	92.1254		248.21	90.308
241.921	87.7768	242.772	87.8921	238.705	92.4843	238.566	92.5067	242.881	92.1016	242.196	92.0792	248.587	91.2026	260.284	89.3312		241.668	87.8752		238.454	92.5172		242.629	92.1137		248.333	90.2944
242.042	87.7563	242.9	87.8722	238.828	92.4723	238.688	92.4963	243.005	92.0901	242.32	92.0674	248.707	91.1895	260.409	89.3172		241.798	87.8547		238.578	92.5065		242.753	92.1021		248.462	90.2806
242.168	87.7355	243.023	87.8523	238.953	92.4608	238.813	92.4861	243.126	92.0785	242.447	92.0556	248.833	91.1768	260.532	89.3026		241.921	87.8344		238.705	92.4955		242.881	92.0904		248.587	90.2669
242.291	87.7145	243.147	87.8324	239.077	92.4497	238.938	92.4757	243.254	92.0667	242.572	92.0438	248.956	91.1641	260.655	89.2879		242.042	87.8143		238.828	92.4843		243.005	92.0788		248.707	90.2534
242.417	87.6933	243.274	87.8124	239.203	92.4384	239.063	92.4654	243.377	92.055	242.695	92.0318	249.081	91.1513	260.781	89.2734		242.168	87.7939		238.953	92.4734		243.126	92.0671		248.833	90.2397
242.54	87.6719	243.399	87.7926	239.327	92.4273	239.188	92.4551	243.501	92.0431	242.82	92.0197	249.203	91.1384	260.902	89.2591		242.291	87.7734		239.077	92.4627		243.254	92.0552		248.956	90.226
242.663	87.6506	243.523	87.7728	239.449	92.416	239.314	92.4448	243.626	92.0316	242.943	92.0076	249.329	91.1253	261.03	89.2446		242.417	87.7529		239.203	92.4519		243.377	92.0434		249.081	90.2124
242.788	87.629	243.645	87.7527	239.574	92.4048	239.436	92.4349	243.752	92.02	243.068	91.9956	249.455	91.1122	261.154	89.2302		242.54	87.7322		239.327	92.4412		243.501	92.0314		249.203	90.1987
242.913	87.6076	243.771	87.7326	239.7	92.3931	239.561	92.4247	243.875	92.0083	243.193	91.9832	249.578	91.099	261.277	89.2155		242.663	87.7117		239.449	92.4304		243.626	92.0196		249.329	90.185
243.038	87.5869	243.896	87.7123	239.823	92.3813	239.687	92.414	243.997	91.996	243.319	91.9712	249.701	91.0858	261.402	89.2008		242.788	87.6909		239.574	92.4198		243.752	92.0078		249.455	90.1712
243.161	87.5658	244.019	87.692	239.948	92.3693	239.811	92.4032	244.125	91.9836	243.443	91.9594	249.828	91.0729	261.526	89.1864		242.913	87.6701		239.7	92.4089		243.875	91.9957		249.578	90.1572
243.287	87.5441	244.145	87.6719	240.072	92.3576	239.932	92.3924	244.246	91.9711	243.568	91.9476	249.954	91.06	261.651	89.1712		243.038	87.6496		239.823	92.3977		243.997	91.9836		249.701	90.1433
243.408	87.5221	244.273	87.6518	240.195	92.3458	240.06	92.3814	244.37	91.9585	243.694	91.9356	250.076	91.0467	261.776	89.1565		243.161	87.6289		239.948	92.3862		244.125	91.9715		249.828	90.1296
243.536	87.5007	244.397	87.6316	240.322	92.3341	240.186	92.371	244.495	91.9465	243.815	91.9236	250.201	91.0335	261.9	89.1417		243.287	87.608		240.072	92.375		244.246	91.9593		249.954	90.1156
243.655	87.4791	244.52	87.6113	240.444	92.3224	240.309	92.3599	244.619	91.9346	243.942	91.9118	250.322	91.0202	262.025	89.1267		243.408	87.5869		240.195	92.3636		244.37	91.9471		250.076	90.1016
243.786	87.4576	244.643	87.5909	240.573	92.3107	240.434	92.3486	244.744	91.9227	244.064	91.8998	250.449	91.0068	262.147	89.1117		243.536	87.5661		240.322	92.3525		244.495	91.935		250.201	90.0876
243.91	87.4363	244.771	87.5702	240.695	92.2988	240.556	92.3375	244.87	91.9108	244.191	91.8879	250.573	90.9928	262.273	89.097		243.655	87.5452		240.444	92.3411		244.619	91.9232		250.322	90.0735
244.033	87.415	244.895	87.5496	240.818	92.2868	240.681	92.326	244.997	91.8987	244.312	91.8758	250.698	90.9794	262.398	89.0817		243.786	87.5242		240.573	92.3297		244.744	91.9113		250.449	90.0593
244.157	87.3934	245.022	87.5291	240.944	92.2747	240.808	92.3142	245.12	91.887	244.439	91.8639	250.823	90.9662	262.523	89.0669		243.91	87.5033		240.695	92.3182		244.87	91.8994		250.573	90.0449
244.282	87.3712	245.146	87.5084	241.07	92.2629	240.931	92.3029	245.246	91.8752	244.564	91.8518	250.949	90.9532	262.644	89.052		244.033	87.4823		240.818	92.3064		244.997	91.8872		250.698	90.0306
244.408	87.349	245.271	87.4877	241.193	92.2511	241.052	92.2917	245.368	91.8632	244.684	91.8397	251.075	90.9401	262.77	89.0368		244.157	87.4613		240.944	92.2944		245.12	91.8755		250.823	90.0165
244.531	87.3269	245.393	87.4669	241.319	92.239	241.178	92.2806	245.491	91.8517	244.807	91.8277	251.196	90.927	262.894	89.022		244.282	87.4398		241.07	92.2829		245.246	91.8635		250.949	90.0026
244.658	87.305	245.518	87.4459	241.44	92.2269	241.304	92.2695	245.618	91.8401	244.93	91.8156	251.321	90.9138	263.019	89.0071		244.408	87.4184		241.193	92.2714		245.368	91.8515		251.075	89.9884
244.78	87.2827	245.642	87.425	241.566	92.2146	241.429	92.258	245.741	91.8279	245.057	91.8035	251.44	90.9008	263.142	88.9923		244.531	87.3969		241.319	92.2598		245.491	91.8397		251.196	89.9745
244.903	87.2603	245.767	87.4041	241.688	92.2028	241.555	92.2469	245.866	91.8155	245.181	91.7913	251.564	90.8875	263.267	88.9773		244.658	87.3755		241.44	92.2482		245.618	91.8278		251.321	89.9604
245.03	87.2378	245.892	87.383	241.814	92.191	241.678	92.2356	245.99	91.803	245.305	91.7791	251.69	90.8745	263.393	88.9621		244.78	87.3538		241.566	92.2363		245.741	91.8157		251.44	89.9466
245.154	87.2149	246.017	87.3619	241.937	92.1792	241.803	92.2243	246.111	91.7906	245.43	91.767	251.814	90.8612	263.518	88.947		244.903	87.3322		241.688	92.2248		245.866	91.8034		251.564	89.9324
245.276	87.192	246.143	87.3409	242.058	92.1677	241.926	92.2133	246.238	91.7781	245.555	91.7548	251.935	90.8476	263.64	88.9319		245.03	87.3104		241.814	92.2133		245.99	91.7911		251.69	89.9183
245.401	87.1691	246.267	87.3197	242.182	92.1562	242.049	92.2024	246.364	91.7658	245.681	91.7425	252.064	90.8341	263.765	88.9164		245.154	87.2884		241.937	92.2018		246.111	91.7788		251.814	89.9041
245.523	87.1467	246.393	87.2986	242.308	92.1442	242.172	92.1913	246.487	91.7537	245.805	91.7303	252.186	90.8201	263.891	88.901		245.276	87.2665		242.058	92.1905		246.238	91.7664		251.935	89.8897
245.649	87.1244	246.518	87.2774	242.436	92.1327	242.296	92.1804	246.613	91.7415	245.93	91.718	252.31	90.8062	264.017	88.8858		245.401	87.2444		242.182	92.1793		246.364	91.7542		252.064	89.8752
245.774	87.1019	246.641	87.2563	242.56	92.1209	242.422	92.1693	246.736	91.7291	246.056	91.7053	252.438	90.7926	264.139	88.8706		245.523	87.2227		242.308	92.1677		246.487	91.742		252.186	89.8606
245.898	87.0792	246.764	87.2353	242.683	92.1091	242.549	92.1584	246.858	91.7169	246.181	91.6929	252.559	90.7794	264.263	88.8554		245.649	87.2009		242.436	92.1566		246.613	91.7297		252.31	89.846
246.024	87.0563	246.89	87.214	242.807	92.097	242.673	92.1475	246.985	91.705	246.302	91.6804	252.686	90.7656	264.385	88.8399		245.774	87.1791		242.56	92.1451		246.736	91.7172		252.438	89.8316
246.145	87.0334	247.013	87.1927	242.932	92.0847	242.796	92.1366	247.107	91.6928	246.427	91.668	252.81	90.7521	264.511	88.8245		245.898	87.1572		242.683	92.1337		246.858	91.7049		252.559	89.8174
246.272	87.0104	247.14	87.1714	243.054	92.0721	242.92	92.1259	247.232	91.6804	246.554	91.6553	252.933	90.7383	264.631	88.8096		246.024	87.1351		242.807	92.1223		246.985	91.6927		252.686	89.8028
246.393	86.9876	247.261	87.15	243.179	92.0597	243.044	92.115	247.355	91.668	246.679	91.6424	253.058	90.7251	264.757	88.7944		246.145	87.1131		242.932	92.1107		247.107	91.6804		252.81	89.7883
246.519	86.9649	247.388	87.1285	243.305	92.0469	243.17	92.1041	247.479	91.6554	246.806	91.6297	253.181	90.7118	264.884	88.7799		246.272	87.0909		243.054	92.099		247.232	91.6678		252.933	89.7739
246.641	86.9422	247.515	87.107	243.429	92.0339	243.294	92.0934	247.608	91.6424	246.928	91.617	253.31	90.6981	265.004	88.7649		246.393	87.0688		243.179	92.0874		247.355	91.6552		253.058	89.7598
246.764	86.9193	247.638	87.0852	243.554	92.0211	243.418	92.0827	247.733	91.6297	247.051	91.6042	253.432	90.6847	265.132	88.75		246.519	87.0467		243.305	92.0755		247.479	91.6426		253.181	89.7459
246.893	86.8961	247.765	87.0635	243.682	92.0079	243.542	92.0716	247.855	91.6173	247.178	91.5913	253.555	90.6713	265.257	88.7353		246.641	87.0246		243.429	92.0636		247.608	91.6297		253.31	89.7315
247.016	86.8727	247.892	87.0416	243.803	91.9954	243.668	92.0606	247.98	91.6046	247.303	91.5787	253.68	90.6576	265.384	88.7206		246.764	87.0023		243.554	92.0519		247.733	91.6169		253.432	89.7173
247.137	86.8495	248.016	87.0198	243.93	91.9831	243.795	92.0494	248.102	91.5919	247.426	91.5659	253.807	90.6437	265.504	88.7057		246.893	86.9798		243.682	92.0398		247.855	91.6043		253.555	89.7033
247.264	86.8262	248.139	86.998	244.053	91.9708	243.917	92.0382	248.229	91.5794	247.549	91.5533	253.929	90.63	265.629	88.6911		247.016	86.9572		243.803	92.028		247.98	91.5916		253.68	89.6891
247.389	86.803	248.262	86.9758	244.18	91.9585	244.044	92.0271	248.353	91.5669	247.674	91.5405	254.057	90.6162	265.753	88.6766		247.137	86.9347		243.93	92.0162		248.102	91.5789		253.807	89.6747
247.513	86.7796	248.385	86.9536	244.301	91.9462	244.167	92.0157	248.476	91.5546	247.798	91.5277	254.183	90.6025	265.878	88.6617		247.264	86.9121		244.053	92.0045		248.229	91.5663		253.929	89.6605
247.637	86.7561	248.512	86.9315	244.425	91.934	244.292	92.004	248.601	91.5421	247.92	91.5151	254.302	90.5886	266.002	88.6469		247.389	86.8894		244.18	91.9928		248.353	91.5537		254.057	89.6464
247.762	86.7328	248.632	86.9094	244.546	91.9225	244.417	91.992	248.725	91.5299	248.046	91.5024	254.429	90.5748	266.13	88.6315		247.513	86.8666		244.301	91.981		248.476	91.5412		254.183	89.6321
247.89	86.7093	248.763	86.8873	244.674	91.9112	244.536	91.98	248.85	91.5176	248.171	91.4898	254.554	90.5613	266.252	88.6167		247.637	86.8438		244.425	91.969		248.601	91.5286		254.302	89.6177
248.013	86.6856	248.887	86.8652	244.795	91.8995	244.66	91.9675	248.974	91.505	248.298	91.4771	254.679	90.5477	266.377	88.602		247.762	86.8211		244.546	91.9573		248.725	91.5161		254.429	89.6032
248.135	86.6619	249.012	86.843	244.919	91.8877	244.788	91.9554	249.099	91.4921	248.418	91.4644	254.801	90.5339	266.5	88.587		247.89	86.7983		244.674	91.9456		248.85	91.5037		254.554	89.589
248.257	86.6383	249.137	86.8208	245.044	91.8756	244.91	91.943	249.224	91.4793	248.547	91.4516	254.927	90.5203	266.626	88.5718		248.013	86.7754		244.795	91.9335		248.974	91.491		254.679	89.5748
248.382	86.6146	249.258	86.7983	245.167	91.8627	245.034	91.9307	249.346	91.4664	248.67	91.4386	255.053	90.5062	266.75	88.5568		248.135	86.7524		244.919	91.9215		249.099	91.4783		254.801	89.5604
248.509	86.5906	249.385	86.7759	245.295	91.8501	245.16	91.9183	249.472	91.4532	248.797	91.4256	255.177	90.4925	266.873	88.5419		248.257	86.7296		245.044	91.9093		249.224	91.4655		254.927	89.5461
248.632	86.5666	249.509	86.7536	245.42	91.8374	245.287	91.9061	249.594	91.4401	248.917	91.4127	255.303	90.4787	266.998	88.5269		248.382	86.7065		245.167	91.8967		249.346	91.4525		255.053	89.5315
248.755	86.5428	249.634	86.7313	245.543	91.8246	245.41	91.8942	249.72	91.4272	249.046	91.3997	255.426	90.4649	267.121	88.5119		248.509	86.6833		245.295	91.8842		249.472	91.4394		255.177	89.5172
248.881	86.5188	249.76	86.7088	245.667	91.8115	245.536	91.8822	249.843	91.4145	249.17	91.3868	255.55	90.451	267.245	88.4967		248.632	86.6601		245.42	91.8718		249.594	91.4264		255.303	89.5028
249.004	86.4946	249.883	86.686	245.79	91.7981	245.659	91.8705	249.967	91.4014	249.291	91.3739	255.673	90.4373	267.371	88.4816		248.755	86.637		245.543	91.8594		249.72	91.4135		255.426	89.4884
249.133	86.4703	250.008	86.6633	245.917	91.7844	245.785	91.8588	250.093	91.3887	249.416	91.3609	255.797	90.4236	267.493	88.4661		248.881	86.6138		245.667	91.8468		249.843	91.4007		255.55	89.4739
249.253	86.4458	250.131	86.6407	246.042	91.7716	245.909	91.8475	250.218	91.376	249.541	91.3479	255.92	90.4098	267.617	88.4506		249.004	86.5903		245.79	91.8343		249.967	91.3877		255.673	89.4594
249.379	86.4217	250.258	86.618	246.17	91.7582	246.028	91.8359	250.341	91.3631	249.666	91.3348	256.045	90.3959	267.742	88.4352		249.133	86.5668		245.917	91.8216		250.093	91.3748		255.797	89.4449
249.505	86.3974	250.382	86.5953	246.291	91.7448	246.154	91.8246	250.466	91.3501	249.792	91.3217	256.17	90.3821	267.866	88.4199		249.253	86.5433		246.042	91.8095		250.218	91.3619		255.92	89.4302
249.629	86.373	250.507	86.5725	246.418	91.7319	246.281	91.8132	250.592	91.3371	249.917	91.3089	256.292	90.3681	267.991	88.4047		249.379	86.5198		246.17	91.797		250.341	91.349		256.045	89.4156
249.752	86.3489	250.634	86.5496	246.54	91.7186	246.402	91.8016	250.713	91.3244	250.041	91.2959	256.419	90.3539	268.117	88.3894		249.505	86.4963		246.291	91.7847		250.466	91.3359		256.17	89.401
249.875	86.3246	250.757	86.5269	246.661	91.7052	246.531	91.7899	250.839	91.3116	250.164	91.2829	256.54	90.3396	268.241	88.374		249.629	86.4728		246.418	91.7726		250.592	91.323		256.292	89.3864
250.002	86.3002	250.883	86.5041	246.786	91.692	246.657	91.778	250.966	91.2983	250.288	91.27	256.666	90.3257	268.366	88.3588		249.752	86.4493		246.54	91.7601		250.713	91.3102		256.419	89.3716
250.127	86.2761	251.008	86.4811	246.908	91.6789	246.781	91.7664	251.089	91.285	250.411	91.2568	256.793	90.3116	268.489	88.3437		249.875	86.4258		246.661	91.7475		250.839	91.2973		256.54	89.3568
250.249	86.2514	251.133	86.4581	247.032	91.6659	246.909	91.7549	251.212	91.272	250.535	91.2435	256.918	90.2976	268.615	88.3285		250.002	86.4021		246.786	91.735		250.966	91.2842		256.666	89.3422
250.373	86.2269	251.255	86.435	247.157	91.653	247.029	91.7432	251.338	91.2586	250.661	91.2303	257.044	90.2831	268.738	88.3136		250.127	86.3786		246.908	91.7226		251.089	91.2709		256.793	89.3276
250.498	86.2028	251.382	86.4117	247.281	91.6398	247.155	91.7313	251.461	91.2453	250.787	91.2171	257.163	90.2688	268.864	88.2983		250.249	86.3548		247.032	91.7104		251.212	91.2577		256.918	89.313
250.621	86.1783	251.507	86.3885	247.404	91.6266	247.276	91.7192	251.586	91.2323	250.912	91.2037	257.291	90.2545	268.988	88.2828		250.373	86.331		247.157	91.6981		251.338	91.2445		257.044	89.2983
250.747	86.1537	251.63	86.3651	247.532	91.6139	247.401	91.7072	251.71	91.2195	251.034	91.1905	257.415	90.2401	269.111	88.2672		250.498	86.3072		247.281	91.6855		251.461	91.2312		257.163	89.2836
250.872	86.1292	251.754	86.342	247.657	91.6016	247.526	91.6953	251.836	91.2066	251.161	91.177	257.542	90.2261	269.236	88.2515		250.621	86.2834		247.404	91.6729		251.586	91.218		257.291	89.2687
250.997	86.1047	251.879	86.3188	247.782	91.5893	247.65	91.6834	251.959	91.1933	251.282	91.1635	257.664	90.2121	269.361	88.2361		250.747	86.2594		247.532	91.6606		251.71	91.205		257.415	89.2536
251.12	86.0804	252.004	86.2954	247.904	91.5767	247.775	91.6716	252.083	91.1799	251.411	91.1502	257.789	90.1979	269.484	88.2208		250.872	86.2356		247.657	91.6484		251.836	91.1918		257.542	89.2388
251.247	86.0558	252.125	86.272	248.025	91.5643	247.896	91.6595	252.209	91.1665	251.534	91.1368	257.914	90.1838	269.608	88.2052		250.997	86.2118		247.782	91.6364		251.959	91.1784		257.664	89.2241
251.369	86.0307	252.253	86.2487	248.154	91.5514	248.022	91.6473	252.332	91.1532	251.657	91.1235	258.037	90.1697	269.728	88.1894		251.12	86.1879		247.904	91.6241		252.083	91.165		257.789	89.2094
251.492	86.006	252.377	86.2254	248.277	91.5385	248.149	91.635	252.455	91.1399	251.782	91.1103	258.16	90.1552	269.858	88.1736		251.247	86.1639		248.025	91.6119		252.209	91.1516		257.914	89.1945
251.617	85.9812	252.504	86.202	248.402	91.5253	248.27	91.6227	252.582	91.1264	251.907	91.097	258.285	90.1407	269.98	88.1578		251.369	86.1397		248.154	91.5994		252.332	91.1384		258.037	89.1795
251.742	85.9558	252.626	86.1787	248.526	91.5124	248.398	91.6102	252.707	91.1131	252.034	91.0836	258.412	90.1263	270.105	88.1424		251.492	86.1157		248.277	91.5868		252.455	91.1251		258.16	89.1644
251.867	85.9307	252.752	86.1553	248.653	91.4998	248.519	91.5979	252.829	91.0996	252.155	91.0703	258.534	90.112	270.229	88.1268		251.617	86.0916		248.402	91.574		252.582	91.1117		258.285	89.1493
251.989	85.9057	252.876	86.1318	248.775	91.4868	248.642	91.5859	252.956	91.086	252.281	91.0571	258.659	90.098	270.352	88.1116		251.742	86.0673		248.526	91.5613		252.707	91.0984		258.412	89.1343
252.113	85.8803	253.001	86.1081	248.9	91.4731	248.766	91.5737	253.08	91.0724	252.404	91.0438	258.784	90.0836	270.479	88.0965		251.867	86.043		248.653	91.5489		252.829	91.0849		258.534	89.1194
252.239	85.8549	253.126	86.0843	249.025	91.4599	248.889	91.5613	253.203	91.0588	252.53	91.0305	258.908	90.0692	270.606	88.0808		251.989	86.0188		248.775	91.5363		252.956	91.0715		258.659	89.1048
252.361	85.8296	253.254	86.0605	249.147	91.4467	249.013	91.5488	253.324	91.0456	252.654	91.017	259.033	90.055	270.725	88.065		252.113	85.9942		248.9	91.5234		253.08	91.0581		258.784	89.09
252.487	85.8043	253.376	86.0369	249.269	91.4334	249.14	91.5363	253.452	91.0325	252.779	91.0036	259.155	90.0407	270.852	88.0493		252.239	85.9696		249.025	91.5106		253.203	91.0446		258.908	89.075
252.613	85.7792	253.5	86.0132	249.397	91.4203	249.264	91.5239	253.576	91.0193	252.902	90.9901	259.281	90.0262	270.977	88.0342		252.361	85.9451		249.147	91.4978		253.324	91.0313		259.033	89.06
252.736	85.7542	253.626	85.9895	249.52	91.4069	249.389	91.5115	253.703	91.0062	253.027	90.9767	259.406	90.0119	271.098	88.0189		252.487	85.9206		249.269	91.4848		253.452	91.018		259.155	89.045
252.861	85.7288	253.75	85.9658	249.646	91.3935	249.513	91.4993	253.824	90.9932	253.151	90.9631	259.531	89.9979	271.223	88.0033		252.613	85.8962		249.397	91.4721		253.576	91.0047		259.281	89.0302
252.99	85.7035	253.877	85.9421	249.768	91.3799	249.64	91.4873	253.949	90.98	253.277	90.9497	259.656	89.9837	271.347	87.9875		252.736	85.8719		249.52	91.4592		253.703	90.9914		259.406	89.0154
253.107	85.6782	253.998	85.9183	249.894	91.3664	249.761	91.4748	254.072	90.9665	253.399	90.9363	259.779	89.9696	271.473	87.9725		252.861	85.8473		249.646	91.4464		253.824	90.9781		259.531	89.0006
253.233	85.6525	254.126	85.8946	250.017	91.3531	249.887	91.462	254.199	90.9529	253.525	90.9229	259.905	89.9552	271.603	87.9569		252.99	85.8228		249.768	91.4336		253.949	90.9648		259.656	88.9856
253.362	85.6269	254.252	85.8709	250.14	91.3398	250.01	91.4494	254.324	90.9394	253.65	90.9095	260.026	89.9408	271.724	87.9413		253.107	85.7982		249.894	91.4206		254.072	90.9514		259.779	88.971
253.485	85.6014	254.376	85.8472	250.267	91.3262	250.138	91.4368	254.448	90.9257	253.777	90.8961	260.15	89.9264	271.849	87.9261		253.233	85.7736		250.017	91.4076		254.199	90.9379		259.905	88.956
253.609	85.5758	254.499	85.8234	250.389	91.3126	250.261	91.4241	254.573	90.9119	253.899	90.8823	260.275	89.9118	271.969	87.9108		253.362	85.7489		250.14	91.3946		254.324	90.9244		260.026	88.941
253.733	85.5503	254.627	85.7995	250.512	91.2987	250.386	91.4118	254.698	90.8984	254.024	90.8685	260.402	89.8975	272.095	87.8954		253.485	85.7243		250.267	91.3815		254.448	90.9109		260.15	88.9262
253.855	85.5244	254.747	85.7755	250.637	91.2852	250.508	91.3994	254.821	90.8845	254.146	90.8548	260.524	89.8831	272.221	87.8795		253.609	85.6996		250.389	91.3683		254.573	90.8971		260.275	88.9113
253.979	85.4984	254.874	85.7516	250.765	91.2716	250.633	91.3869	254.944	90.8709	254.274	90.841	260.647	89.8686	272.347	87.8641		253.733	85.6749		250.512	91.3553		254.698	90.8835		260.402	88.8965
254.105	85.4727	254.999	85.7276	250.887	91.2577	250.756	91.3739	255.068	90.857	254.395	90.8272	260.77	89.854	272.471	87.8491		253.855	85.65		250.637	91.3423		254.821	90.8697		260.524	88.8813
254.227	85.4471	255.125	85.7034	251.012	91.2443	250.884	91.3611	255.195	90.8431	254.522	90.8133	260.893	89.8394	272.594	87.8341		253.979	85.625		250.765	91.3292		254.944	90.8559		260.647	88.8663
254.354	85.4213	255.251	85.6792	251.139	91.2301	251.006	91.3483	255.317	90.8295	254.646	90.7993	261.022	89.8244	272.719	87.8184		254.105	85.6001		250.887	91.3158		255.068	90.8421		260.77	88.8515
254.476	85.3957	255.375	85.6549	251.261	91.2167	251.129	91.3354	255.44	90.8161	254.771	90.7853	261.146	89.81	272.842	87.8032		254.227	85.5753		251.012	91.3027		255.195	90.8282		260.893	88.8368
254.6	85.3707	255.5	85.6305	251.388	91.2033	251.253	91.3225	255.565	90.8025	254.895	90.7713	261.269	89.7955	272.964	87.7876		254.354	85.5503		251.139	91.2892		255.317	90.8144		261.022	88.8214
254.73	85.3451	255.622	85.6062	251.511	91.1895	251.38	91.3097	255.69	90.7892	255.019	90.7573	261.396	89.7808	273.089	87.7724		254.476	85.5253		251.261	91.276		255.44	90.8007		261.146	88.8066
254.851	85.3195	255.748	85.5819	251.633	91.1761	251.504	91.297	255.813	90.7758	255.145	90.7434	261.523	89.7663	273.215	87.7569		254.6	85.5006		251.388	91.2629		255.565	90.7869		261.269	88.7916
254.977	85.2937	255.87	85.5575	251.76	91.1627	251.629	91.284	255.937	90.7619	255.27	90.7296	261.646	89.7512	273.339	87.7414		254.73	85.4756		251.511	91.2496		255.69	90.7733		261.396	88.7766
255.1	85.2682	255.999	85.5331	251.881	91.1491	251.752	91.2712	256.065	90.7482	255.395	90.7156	261.769	89.7367	273.466	87.726		254.851	85.4507		251.633	91.2365		255.813	90.7596		261.523	88.7616
255.226	85.2426	256.126	85.5087	252.007	91.1359	251.876	91.2586	256.192	90.7344	255.517	90.7018	261.892	89.7225	273.589	87.7105		254.977	85.4256		251.76	91.2233		255.937	90.7457		261.646	88.7463
255.35	85.2166	256.249	85.4843	252.13	91.1227	252.002	91.2465	256.316	90.7206	255.643	90.6878	262.015	89.7078	273.708	87.6949		255.1	85.4006		251.881	91.2101		256.065	90.7319		261.769	88.7314
255.476	85.1906	256.371	85.4598	252.259	91.1089	252.127	91.2339	256.439	90.7067	255.766	90.6739	262.143	89.6933	273.835	87.6791		255.226	85.3757		252.007	91.1972		256.192	90.7181		261.892	88.7165
255.598	85.1643	256.497	85.4356	252.379	91.0956	252.25	91.2214	256.56	90.6926	255.891	90.6602	262.266	89.679	273.959	87.6632		255.35	85.3505		252.13	91.1846		256.316	90.7042		262.015	88.7013
255.724	85.1381	256.621	85.4113	252.505	91.0815	252.375	91.209	256.689	90.6789	256.017	90.6465	262.393	89.6642	274.084	87.6474		255.476	85.3252		252.259	91.1714		256.439	90.6903		262.143	88.6862
255.849	85.1116	256.747	85.3871	252.629	91.0677	252.499	91.1963	256.813	90.6652	256.139	90.6327	262.514	89.6495	274.208	87.6319		255.598	85.2999		252.379	91.1585		256.56	90.6764		262.266	88.6711
255.971	85.0856	256.874	85.3627	252.754	91.0538	252.624	91.1838	256.935	90.6515	256.269	90.6189	262.641	89.635	274.334	87.6159		255.724	85.2747		252.505	91.1453		256.689	90.6627		262.393	88.6558
256.096	85.0594	256.997	85.3381	252.88	91.0394	252.75	91.1714	257.061	90.6379	256.391	90.6052	262.764	89.6203	274.457	87.6002		255.849	85.2494		252.629	91.132		256.813	90.649		262.514	88.6407
256.22	85.0335	257.123	85.3136	253.002	91.0256	252.872	91.1588	257.186	90.6242	256.514	90.5914	262.888	89.6058	274.579	87.5843		255.971	85.2241		252.754	91.1188		256.935	90.6352		262.641	88.6255
256.347	85.0074	257.248	85.2891	253.126	91.0117	252.996	91.1459	257.31	90.6107	256.638	90.5778	263.01	89.5911	274.706	87.5684		256.096	85.1987		252.88	91.1054		257.061	90.6215		262.764	88.6102
256.471	84.9809	257.372	85.2645	253.25	90.9975	253.12	91.1331	257.435	90.5969	256.764	90.564	263.137	89.5761	274.83	87.5525		256.22	85.1735		253.002	91.0922		257.186	90.6078		262.888	88.5951
256.591	84.9547	257.498	85.2399	253.377	90.9835	253.243	91.1201	257.558	90.5832	256.887	90.5503	263.258	89.5616	274.956	87.5372		256.347	85.1482		253.126	91.0788		257.31	90.5943		263.01	88.5798
256.718	84.9285	257.622	85.2153	253.5	90.9697	253.369	91.1072	257.682	90.5695	257.018	90.5364	263.383	89.5469	275.08	87.5216		256.471	85.1227		253.25	91.0653		257.435	90.5804		263.137	88.5643
256.842	84.902	257.747	85.1904	253.621	90.9563	253.495	91.0945	257.807	90.5557	257.14	90.5223	263.508	89.532	275.201	87.5061		256.591	85.0973		253.377	91.0518		257.558	90.5667		263.258	88.5494
256.969	84.8755	257.871	85.1655	253.748	90.9426	253.619	91.0818	257.93	90.5416	257.266	90.5083	263.637	89.5173	275.325	87.4903		256.718	85.0719		253.5	91.0385		257.682	90.5529		263.383	88.5343
257.094	84.8487	257.994	85.1408	253.869	90.9281	253.741	91.0691	258.057	90.5277	257.388	90.4942	263.755	89.5025	275.45	87.4745		256.842	85.0462		253.621	91.0254		257.807	90.539		263.508	88.5191
257.216	84.8222	258.122	85.1161	253.996	90.914	253.867	91.0557	258.179	90.5136	257.514	90.4802	263.885	89.4878	275.575	87.4587		256.969	85.0205		253.748	91.0122		257.93	90.5249		263.637	88.5038
257.339	84.7958	258.247	85.0914	254.123	90.9002	253.993	91.0426	258.308	90.4996	257.632	90.4662	264.006	89.4734	275.7	87.443		257.094	84.9948		253.869	90.9986		258.057	90.5109		263.755	88.4885
257.464	84.7692	258.37	85.0667	254.244	90.886	254.117	91.0295	258.432	90.4855	257.761	90.4521	264.131	89.4585	275.825	87.4273		257.216	84.9691		253.996	90.9849		258.179	90.4969		263.885	88.4732
257.589	84.7426	258.496	85.0421	254.367	90.8716	254.241	91.0164	258.557	90.4712	257.884	90.4378	264.255	89.4437	275.947	87.4115		257.339	84.9436		254.123	90.9714		258.308	90.4829		264.006	88.4582
257.714	84.7163	258.62	85.0173	254.495	90.8578	254.365	91.003	258.682	90.4571	258.009	90.4238	264.383	89.4291	276.075	87.3957		257.464	84.918		254.244	90.9578		258.432	90.4688		264.131	88.4429
257.84	84.6898	258.744	84.9925	254.617	90.8439	254.487	90.9897	258.803	90.443	258.133	90.4097	264.504	89.4145	276.196	87.3794		257.589	84.8924		254.367	90.944		258.557	90.4545		264.255	88.4276
257.963	84.6634	258.873	84.9676	254.746	90.8299	254.613	90.9767	258.927	90.4292	258.255	90.3956	264.63	89.3995	276.323	87.3634		257.714	84.8668		254.495	90.9304		258.682	90.4404		264.383	88.4124
258.087	84.6374	258.995	84.9429	254.867	90.8158	254.735	90.9633	259.054	90.4149	258.381	90.3816	264.754	89.3848	276.449	87.3475		257.84	84.8412		254.617	90.9168		258.803	90.4264		264.504	88.3969
258.211	84.6113	259.118	84.9182	254.993	90.802	254.859	90.9498	259.177	90.4006	258.507	90.3674	264.879	89.3696	276.575	87.3318		257.963	84.8155		254.746	90.9033		258.927	90.4124		264.63	88.3815
258.335	84.5855	259.244	84.8932	255.12	90.7884	254.985	90.9366	259.301	90.3863	258.627	90.3533	265.001	89.3548	276.698	87.3155		258.087	84.7901		254.867	90.8895		259.054	90.3983		264.754	88.3662
258.462	84.5593	259.369	84.8683	255.244	90.7746	255.107	90.9237	259.425	90.3719	258.754	90.3389	265.124	89.3397	276.822	87.2994		258.211	84.7647		254.993	90.8759		259.177	90.384		264.879	88.3507
258.586	84.5328	259.494	84.8434	255.365	90.7609	255.234	90.9104	259.551	90.3573	258.877	90.3248	265.251	89.3248	276.946	87.2833		258.335	84.7393		255.12	90.8625		259.301	90.3698		265.001	88.3352
258.712	84.5062	259.62	84.8184	255.487	90.7473	255.359	90.8974	259.675	90.3428	259.002	90.3109	265.373	89.3104	277.071	87.2675		258.462	84.7138		255.244	90.8492		259.425	90.3554		265.124	88.3196
258.837	84.4795	259.747	84.7935	255.615	90.7338	255.482	90.8845	259.801	90.3287	259.127	90.2968	265.499	89.2957	277.191	87.2515		258.586	84.6881		255.365	90.8357		259.551	90.341		265.251	88.3041
258.961	84.4532	259.872	84.7686	255.736	90.72	255.605	90.8718	259.924	90.3144	259.253	90.2823	265.623	89.2808	277.32	87.2353		258.712	84.6623		255.487	90.8224		259.675	90.3268		265.373	88.289
259.084	84.4267	259.997	84.7435	255.862	90.7059	255.731	90.8587	260.046	90.3	259.375	90.2681	265.748	89.2659	277.442	87.2191		258.837	84.6365		255.615	90.8091		259.801	90.3127		265.499	88.2736
259.204	84.4	260.122	84.7187	255.986	90.6919	255.857	90.8455	260.172	90.2856	259.501	90.254	265.873	89.2513	277.57	87.2029		258.961	84.6109		255.736	90.7959		259.924	90.2983		265.623	88.258
259.334	84.3734	260.244	84.6938	256.111	90.6777	255.98	90.8325	260.298	90.2717	259.624	90.2398	265.997	89.2367	277.692	87.1871		259.084	84.5851		255.862	90.7823		260.046	90.2841		265.748	88.2425
259.459	84.347	260.373	84.6687	256.232	90.6632	256.105	90.8197	260.421	90.2577	259.75	90.2255	266.123	89.2222	277.816	87.1709		259.204	84.5593		255.986	90.7687		260.172	90.2698		265.873	88.2271
259.581	84.3202	260.497	84.6437	256.36	90.6487	256.229	90.8068	260.545	90.2435	259.874	90.2112	266.246	89.2073	277.943	87.1551		259.334	84.5336		256.111	90.7551		260.298	90.2557		265.997	88.2119
259.706	84.2934	260.621	84.6188	256.484	90.6348	256.353	90.7936	260.67	90.2294	260.001	90.1973	266.37	89.1925	278.068	87.1394		259.459	84.5079		256.232	90.7415		260.421	90.2416		266.123	88.1965
259.832	84.2667	260.745	84.5939	256.605	90.6203	256.475	90.7804	260.793	90.2153	260.123	90.1829	266.498	89.1774	278.189	87.1233		259.581	84.4819		256.36	90.7278		260.545	90.2274		266.246	88.1812
259.955	84.24	260.873	84.5688	256.731	90.606	256.605	90.7666	260.917	90.2012	260.245	90.1683	266.619	89.1618	278.317	87.1071		259.706	84.4561		256.484	90.7142		260.67	90.2134		266.37	88.166
260.079	84.2132	260.996	84.5435	256.855	90.5919	256.728	90.7531	261.042	90.187	260.369	90.1541	266.741	89.1468	278.437	87.091		259.832	84.4303		256.605	90.7003		260.793	90.1991		266.498	88.1503
260.203	84.1863	261.12	84.5186	256.978	90.5773	256.851	90.7389	261.169	90.1726	260.498	90.1399	266.868	89.1319	278.563	87.0751		259.955	84.4044		256.731	90.6863		260.917	90.1848		266.619	88.1345
260.326	84.1598	261.246	84.4936	257.104	90.5635	256.977	90.7248	261.288	90.1583	260.621	90.1257	266.989	89.1169	278.685	87.0594		260.079	84.3784		256.855	90.6725		261.042	90.1706		266.741	88.1189
260.452	84.1333	261.37	84.4685	257.228	90.5489	257.101	90.7109	261.414	90.1441	260.744	90.1112	267.113	89.1016	278.811	87.0435		260.203	84.3524		256.978	90.6581		261.169	90.1563		266.868	88.1035
260.574	84.1067	261.497	84.4434	257.353	90.5346	257.226	90.6972	261.541	90.1297	260.869	90.0968	267.238	89.0864	278.935	87.0273		260.326	84.3267		257.104	90.6442		261.288	90.142		266.989	88.0881
260.703	84.0798	261.619	84.4183	257.478	90.5203	257.349	90.6834	261.663	90.1152	260.998	90.0825	267.365	89.0713	279.06	87.0115		260.452	84.3009		257.228	90.6299		261.414	90.1277		267.113	88.0725
260.83	84.0532	261.746	84.3931	257.598	90.5066	257.472	90.6694	261.785	90.1007	261.122	90.0682	267.49	89.0563	279.185	86.9955		260.574	84.275		257.353	90.6159		261.541	90.1132		267.238	88.0569
260.951	84.0269	261.87	84.3678	257.723	90.4924	257.596	90.6558	261.912	90.0863	261.246	90.0535	267.614	89.0412	279.312	86.9793		260.703	84.249		257.478	90.6018		261.663	90.0988		267.365	88.0414
261.076	84.0005	261.999	84.3427	257.851	90.4783	257.721	90.6422	262.037	90.0718	261.367	90.039	267.74	89.0264	279.436	86.9636		260.83	84.2231		257.598	90.588		261.785	90.0845		267.49	88.0259
261.201	83.9744	262.12	84.3175	257.974	90.4638	257.845	90.6286	262.163	90.0576	261.493	90.0246	267.862	89.0118	279.56	86.9479		260.951	84.1973		257.723	90.5741		261.912	90.0699		267.614	88.0102
261.326	83.9486	262.245	84.2925	258.094	90.4489	257.968	90.6151	262.284	90.0434	261.618	90.0099	267.987	88.997	279.681	86.9321		261.076	84.1716		257.851	90.5602		262.037	90.0554		267.74	87.995
261.45	83.9224	262.368	84.2673	258.223	90.4347	258.092	90.602	262.41	90.0292	261.742	89.9954	268.109	88.9819	279.809	86.916		261.201	84.1459		257.974	90.5462		262.163	90.0411		267.862	87.9798
261.574	83.8959	262.493	84.2424	258.344	90.4199	258.215	90.5892	262.537	90.0147	261.869	89.9809	268.237	88.9668	279.932	86.9002		261.326	84.1205		258.094	90.532		262.284	90.0266		267.987	87.9646
261.698	83.8695	262.617	84.2175	258.471	90.4058	258.34	90.5763	262.658	90.0001	261.991	89.9663	268.36	88.952	280.06	86.884		261.45	84.0949		258.223	90.5183		262.41	90.0123		268.109	87.949
261.825	83.843	262.741	84.1924	258.596	90.3915	258.463	90.5631	262.783	89.9854	262.117	89.9516	268.485	88.9369	280.182	86.8679		261.574	84.0692		258.344	90.5046		262.537	89.9978		268.237	87.9335
261.949	83.8163	262.867	84.1673	258.721	90.3774	258.588	90.5496	262.911	89.971	262.24	89.937	268.609	88.9221	280.308	86.8519		261.698	84.0435		258.471	90.491		262.658	89.9832		268.36	87.918
262.073	83.7897	262.995	84.1424	258.848	90.3627	258.714	90.5363	263.031	89.9564	262.361	89.9224	268.734	88.9073	280.432	86.836		261.825	84.0177		258.596	90.4773		262.783	89.9685		268.485	87.9024
262.198	83.7627	263.12	84.1175	258.967	90.3484	258.838	90.523	263.157	89.9418	262.488	89.9081	268.855	88.8923	280.555	86.8198		261.949	83.9918		258.721	90.4635		262.911	89.954		268.609	87.887
262.323	83.7359	263.243	84.0924	259.091	90.334	258.963	90.5098	263.281	89.9273	262.614	89.8937	268.978	88.877	280.674	86.8034		262.073	83.966		258.848	90.4495		263.031	89.9394		268.734	87.8717
262.45	83.7085	263.368	84.0674	259.218	90.3197	259.087	90.4966	263.406	89.9126	262.739	89.879	269.107	88.8616	280.798	86.787		262.198	83.9401		258.967	90.4357		263.157	89.9249		268.855	87.8561
262.569	83.6809	263.493	84.0424	259.344	90.3054	259.211	90.4833	263.531	89.8981	262.864	89.8644	269.234	88.8465	280.925	86.7709		262.323	83.9142		259.091	90.4219		263.281	89.9105		268.978	87.8402
262.695	83.6536	263.618	84.0175	259.468	90.2908	259.337	90.4697	263.657	89.8834	262.987	89.8499	269.353	88.8314	281.052	86.7549		262.45	83.8879		259.218	90.4082		263.406	89.8958		269.107	87.8243
262.821	83.6265	263.746	83.9923	259.592	90.2763	259.46	90.4561	263.781	89.8689	263.109	89.8349	269.475	88.8164	281.176	86.7384		262.569	83.8617		259.344	90.3944		263.531	89.8813		269.234	87.8087
262.947	83.5994	263.866	83.9672	259.714	90.2616	259.584	90.4423	263.904	89.8547	263.236	89.8201	269.605	88.8011	281.3	86.7224		262.695	83.8355		259.468	90.3803		263.657	89.8666		269.353	87.7931
263.069	83.5724	263.993	83.942	259.838	90.2466	259.709	90.4286	264.027	89.8404	263.359	89.8057	269.728	88.7858	281.424	86.7064		262.821	83.8094		259.592	90.3662		263.781	89.8519		269.475	87.7774
263.193	83.5454	264.115	83.9172	259.964	90.2318	259.835	90.4151	264.151	89.826	263.485	89.791	269.854	88.7705	281.547	86.6905		262.947	83.7833		259.714	90.3519		263.904	89.8374		269.605	87.7618
263.318	83.5184	264.243	83.8922	260.089	90.2169	259.956	90.4017	264.278	89.812	263.608	89.7765	269.978	88.7554	281.672	86.6744		263.069	83.7572		259.838	90.3376		264.027	89.823		269.728	87.7461
263.441	83.4913	264.368	83.8672	260.212	90.2018	260.078	90.388	264.401	89.7978	263.734	89.7618	270.104	88.7405	281.797	86.6584		263.193	83.7313		259.964	90.3234		264.151	89.8085		269.854	87.7305
263.568	83.4643	264.491	83.8421	260.334	90.1867	260.206	90.374	264.526	89.7834	263.858	89.7471	270.229	88.7257	281.921	86.6426		263.318	83.7053		260.089	90.3093		264.278	89.7942		269.978	87.7149
263.694	83.4374	264.619	83.8168	260.461	90.1718	260.333	90.36	264.652	89.7685	263.985	89.7323	270.353	88.7111	282.044	86.6266		263.441	83.6792		260.212	90.2949		264.401	89.7798		270.104	87.6995
263.818	83.411	264.744	83.7915	260.584	90.1575	260.457	90.3461	264.777	89.7537	264.105	89.7178	270.474	88.6956	282.169	86.6106		263.568	83.6532		260.334	90.2804		264.526	89.7653		270.229	87.6841
263.938	83.3845	264.864	83.7663	260.707	90.1428	260.581	90.3325	264.902	89.7392	264.235	89.7033	270.6	88.6803	282.295	86.5946		263.694	83.6271		260.461	90.2659		264.652	89.7504		270.353	87.6688
264.062	83.3577	264.986	83.7412	260.832	90.128	260.704	90.3188	265.024	89.7245	264.357	89.6891	270.726	88.6652	282.417	86.5782		263.818	83.6012		260.584	90.2518		264.777	89.7357		270.474	87.6531
264.19	83.3309	265.119	83.7162	260.955	90.1137	260.828	90.3049	265.149	89.7096	264.484	89.6748	270.848	88.6499	282.545	86.5616		263.938	83.5754		260.707	90.2377		264.902	89.7213		270.6	87.6374
[truncated: 6,957 more rows]

## Sheet: Raman spectra data
1000C Raman data
CS20K-based carbon fibers				CS15K-based carbon fibers				CS9K-based carbon fibers
Raman Shift (cm-1)	Intensity (a.u.)	Offset intensity		Raman Shift (cm-1)	Intensity (a.u.)	Offset intensity		Raman Shift (cm-1)	Intensity (a.u.)	Offset intensity
3045.31	0.876981	100.877		3045.24	-0.96043	897.311		3045.24	41.3306	1641.33
3044.68	2.72586	102.726		3044.61	3.61607	910.125		3044.61	40.1564	1640.16
3044.05	3.49664	103.497		3043.98	6.48223	918.15		3043.99	37.0375	1637.04
3043.43	3.93921	103.939		3043.36	9.48575	926.56		3043.36	32.9721	1632.97
3042.8	4.44541	104.445		3042.73	12.3938	934.703		3042.73	28.5046	1628.5
3042.17	5.39482	105.395		3042.1	13.3959	937.509		3042.1	25.9022	1625.9
3041.55	5.88779	105.888		3041.47	13.9829	939.152		3041.48	21.5796	1621.58
3040.92	6.04906	106.049		3040.85	14.0308	939.286		3040.85	19.8577	1619.86
3040.29	6.28459	106.285		3040.22	12.749	935.697		3040.22	17.4223	1617.42
3039.66	6.04476	106.045		3039.59	11.0678	930.99		3039.59	16.0485	1616.05
3039.04	5.50008	105.5		3038.96	8.97756	925.137		3038.97	15.2809	1615.28
3038.41	5.58525	105.585		3038.34	6.5722	918.402		3038.34	15.1267	1615.13
3037.78	5.19519	105.195		3037.71	3.36486	909.422		3037.71	15.6508	1615.65
3037.15	4.69628	104.696		3037.08	1.64271	904.6		3037.08	15.1461	1615.15
3036.52	4.31687	104.317		3036.45	1.58891	904.449		3036.45	15.8529	1615.85
3035.89	4.15356	104.154		3035.82	1.96425	905.5		3035.83	17.0122	1617.01
3035.27	5.5945	105.594		3035.19	1.37439	903.848		3035.2	17.3655	1617.37
3034.64	5.64177	105.642		3034.57	1.8191	905.093		3034.57	19.1213	1619.12
3034.01	4.66732	104.667		3033.94	3.65693	910.239		3033.94	18.9859	1618.99
3033.38	4.84477	104.845		3033.31	3.89715	910.912		3033.31	18.5596	1618.56
3032.75	4.64032	104.64		3032.68	3.37756	909.457		3032.68	18.531	1618.53
3032.12	6.04637	106.046		3032.05	5.3006	914.842		3032.05	18.8116	1618.81
3031.49	7.78893	107.789		3031.42	5.66876	915.873		3031.43	19.3324	1619.33
3030.87	7.52049	107.52		3030.79	6.2031	917.369		3030.8	19.8118	1619.81
3030.24	7.88182	107.882		3030.16	5.53549	915.499		3030.17	19.8723	1619.87
3029.61	7.17992	107.18		3029.54	5.91086	916.55		3029.54	18.2405	1618.24
3028.98	5.30034	105.3		3028.91	7.04645	919.73		3028.91	16.867	1616.87
3028.35	4.25936	104.259		3028.28	8.33075	923.326		3028.28	17.0411	1617.04
3027.72	3.99455	103.995		3027.65	8.46184	923.693		3027.65	16.572	1616.57
3027.09	2.65425	102.654		3027.02	7.69156	921.536		3027.02	16.9183	1616.92
3026.46	2.72141	102.721		3026.39	7.64473	921.405		3026.39	18.4407	1618.44
3025.83	4.16027	104.16		3025.76	7.07984	919.824		3025.76	20.0157	1620.02
3025.2	2.26921	102.269		3025.13	7.2261	920.233		3025.13	19.6845	1619.68
3024.57	1.63289	101.633		3024.5	7.37786	920.658		3024.5	22.096	1622.1
3023.94	1.76258	101.763		3023.87	6.24173	917.477		3023.87	22.7482	1622.75
3023.31	1.27743	101.277		3023.24	4.42647	912.394		3023.24	21.4904	1621.49
3022.68	2.24398	102.244		3022.61	3.65345	910.23		3022.61	22.6371	1622.64
3022.05	3.52322	103.523		3021.98	3.2544	909.112		3021.98	21.1812	1621.18
3021.42	5.27254	105.273		3021.35	3.09086	908.654		3021.35	18.7338	1618.73
3020.79	3.6084	103.608		3020.72	4.16511	911.662		3020.72	16.6304	1616.63
3020.16	3.55863	103.559		3020.09	5.11462	914.321		3020.09	18.6047	1618.6
3019.53	4.1083	104.108		3019.45	5.73724	916.064		3019.46	20.2994	1620.3
3018.9	5.23546	105.235		3018.82	3.55231	909.946		3018.83	23.3358	1623.34
3018.26	4.69613	104.696		3018.19	3.65394	910.231		3018.2	23.604	1623.6
3017.63	4.62573	104.626		3017.56	2.2004	906.161		3017.56	22.7615	1622.76
3017	4.19625	104.196		3016.93	1.24422	903.484		3016.93	26.4752	1626.48
3016.37	2.62978	102.63		3016.3	-0.093204	899.739		3016.3	28.96	1628.96
3015.74	1.80208	101.802		3015.67	-1.29696	896.369		3015.67	28.8395	1628.84
3015.11	2.39032	102.39		3015.04	-1.80449	894.947		3015.04	28.4109	1628.41
3014.48	2.85666	102.857		3014.4	-2.46378	893.101		3014.41	28.8938	1628.89
3013.85	3.51763	103.518		3013.77	-3.64826	889.785		3013.78	29.8146	1629.81
3013.21	3.80158	103.802		3013.14	-4.90751	886.259		3013.14	31.4644	1631.46
3012.58	2.80076	102.801		3012.51	-4.23029	888.155		3012.51	30.4055	1630.41
3011.95	0.879266	100.879		3011.88	-4.73078	886.754		3011.88	30.4581	1630.46
3011.32	-0.147199	99.8528		3011.25	-2.65509	892.566		3011.25	28.1731	1628.17
3010.69	-0.157686	99.8423		3010.61	-0.015786	899.956		3010.62	27.2322	1627.23
3010.05	0.312602	100.313		3009.98	1.95017	905.46		3009.98	26.1953	1626.2
3009.42	-0.2715	99.7285		3009.35	5.07198	914.202		3009.35	24.2716	1624.27
3008.79	-2.29271	97.7073		3008.72	7.61616	921.325		3008.72	21.7118	1621.71
3008.16	-3.77928	96.2207		3008.08	10.1356	928.38		3008.09	22.3188	1622.32
3007.52	-5.0299	94.9701		3007.45	10.4732	929.325		3007.45	20.8402	1620.84
3006.89	-4.22998	95.77		3006.82	10.1887	928.528		3006.82	22.7039	1622.7
3006.26	-3.64281	96.3572		3006.19	9.77445	927.368		3006.19	21.8533	1621.85
3005.62	-2.11697	97.883		3005.55	8.31279	923.276		3005.56	22.261	1622.26
3004.99	1.51398	101.514		3004.92	6.97967	919.543		3004.92	23.7874	1623.79
3004.36	2.66291	102.663		3004.29	6.96159	919.492		3004.29	25.2451	1625.25
3003.73	6.10331	106.103		3003.65	6.67499	918.69		3003.66	29.3917	1629.39
3003.09	6.7898	106.79		3003.02	4.00952	911.227		3003.02	29.784	1629.78
3002.46	7.2171	107.217		3002.39	2.84911	907.978		3002.39	30.5345	1630.53
3001.83	6.2296	106.23		3001.75	2.64592	907.409		3001.76	32.0825	1632.08
3001.19	5.55131	105.551		3001.12	0.572524	901.603		3001.12	31.1336	1631.13
3000.56	5.92312	105.923		3000.49	-0.038536	899.892		3000.49	31.286	1631.29
2999.92	5.6286	105.629		2999.85	0.796267	902.23		2999.85	33.0179	1633.02
2999.29	6.0867	106.087		2999.22	1.77477	904.969		2999.22	33.9509	1633.95
2998.66	5.63846	105.638		2998.58	0.913524	902.558		2998.59	34.8119	1634.81
2998.02	3.38831	103.388		2997.95	1.82255	905.103		2997.95	33.0948	1633.09
2997.39	3.40156	103.402		2997.32	2.98804	908.367		2997.32	29.7507	1629.75
2996.75	1.839	101.839		2996.68	4.83768	913.546		2996.68	27.7388	1627.74
2996.12	1.89674	101.897		2996.05	5.37901	915.061		2996.05	27.9278	1627.93
2995.48	1.36779	101.368		2995.41	4.84773	913.574		2995.42	24.7845	1624.78
2994.85	1.75039	101.75		2994.78	5.62974	915.763		2994.78	22.4822	1622.48
2994.22	2.06367	102.064		2994.14	5.40966	915.147		2994.15	23.151	1623.15
2993.58	1.84264	101.843		2993.51	6.41381	917.959		2993.51	22.433	1622.43
2992.95	2.37303	102.373		2992.87	6.11648	917.126		2992.88	21.7506	1621.75
2992.31	2.64233	102.642		2992.24	4.72862	913.24		2992.24	22.7488	1622.75
2991.68	3.50631	103.506		2991.6	4.2836	911.994		2991.61	24.9932	1624.99
2991.04	2.95612	102.956		2990.97	3.9843	911.156		2990.97	28.2365	1628.24
2990.41	3.41399	103.414		2990.33	4.34301	912.16		2990.34	29.177	1629.18
2989.77	3.32562	103.326		2989.7	5.27546	914.771		2989.7	30.3369	1630.34
2989.13	2.39681	102.397		2989.06	6.40907	917.945		2989.07	30.4788	1630.48
2988.5	1.70133	101.701		2988.43	7.58379	921.235		2988.43	33.3875	1633.39
2987.86	1.00598	101.006		2987.79	7.96883	922.313		2987.79	35.0693	1635.07
2987.23	2.38914	102.389		2987.16	6.98433	919.556		2987.16	36.5026	1636.5
2986.59	3.51201	103.512		2986.52	5.31384	914.879		2986.52	35.4184	1635.42
2985.96	4.66202	104.662		2985.88	4.24748	911.893		2985.89	33.968	1633.97
2985.32	3.59446	103.594		2985.25	1.9351	905.418		2985.25	31.5184	1631.52
2984.68	4.73479	104.735		2984.61	-0.257259	899.28		2984.61	30.7408	1630.74
2984.05	4.40192	104.402		2983.98	-0.850519	897.619		2983.98	29.8087	1629.81
2983.41	3.33481	103.335		2983.34	-0.495266	898.613		2983.34	27.1105	1627.11
2982.77	5.38342	105.383		2982.7	-0.302138	899.154		2982.71	25.5234	1625.52
2982.14	4.86024	104.86		2982.07	-0.640569	898.206		2982.07	24.3774	1624.38
2981.5	2.58146	102.581		2981.43	-1.10713	896.9		2981.43	23.0725	1623.07
2980.86	0.614076	100.614		2980.79	-1.04137	897.084		2980.8	22.7814	1622.78
2980.23	-2.93068	97.0693		2980.16	-0.899696	897.481		2980.16	23.7602	1623.76
2979.59	-4.58929	95.4107		2979.52	0.136836	900.383		2979.52	23.6734	1623.67
2978.95	-4.58397	95.416		2978.88	-1.14219	896.802		2978.88	24.3814	1624.38
2978.32	-4.6975	95.3025		2978.24	-1.60395	895.509		2978.25	24.8649	1624.86
2977.68	-5.77225	94.2277		2977.61	-2.19392	893.857		2977.61	25.1369	1625.14
2977.04	-8.1716	91.8284		2976.97	-1.22302	896.576		2976.97	25.2974	1625.3
2976.4	-11.284	88.716		2976.33	-1.64466	895.395		2976.34	25.7438	1625.74
2975.77	-12.4316	87.5684		2975.69	-3.69943	889.642		2975.7	25.2232	1625.22
2975.13	-14.1577	85.8423		2975.06	-4.66663	886.933		2975.06	26.6245	1626.62
2974.49	-15.0824	84.9176		2974.42	-6.1173	882.872		2974.42	26.0871	1626.09
2973.85	-14.213	85.787		2973.78	-5.69695	884.049		2973.78	26.0593	1626.06
2973.22	-13.7557	86.2443		2973.14	-6.57812	881.581		2973.15	25.54	1625.54
2972.58	-12.7104	87.2896		2972.51	-6.56899	881.607		2972.51	27.4144	1627.41
2971.94	-12.5625	87.4375		2971.87	-3.60294	889.912		2971.87	29.4839	1629.48
2971.3	-11.942	88.058		2971.23	0.413055	901.157		2971.23	29.2486	1629.25
2970.66	-9.06147	90.9385		2970.59	2.85418	907.992		2970.59	29.546	1629.55
2970.03	-10.7795	89.2205		2969.95	4.55234	912.747		2969.96	27.9535	1627.95
2969.39	-8.75312	91.2469		2969.31	7.24329	920.281		2969.32	28.0408	1628.04
[truncated: 3,275 more rows]

## Sheet: WAXRD data
																CS9.4K-based CFs				CS15K-based CFs				CS20K-based CFs
[truncated: 6,286 more rows]
